# Supplementary material for: Transcriptomic analysis of the upper lip and primary palate development in mice
Source: Front Genet. 2023 Jan 6;13:1039850. doi: 10.3389/fgene.2022.1039850 (PMC9852879; doi:10.3389/fgene.2022.1039850)
Supplement: Supplementary file 2 [file Table3.XLSX]

## Sheet: GO-E11 5vsgroupE10 5_deg_down
Category	Term	Count	%	PValue	Genes	List Total	Pop Hits	Pop Total	Fold Enrichment	Bonferroni	Benjamini	FDR
GOTERM_BP_DIRECT	GO:0007275~multicellular organism development	85	18.1624	8.76634e-32	TRIM71, SEMA5B, RTL1, ROBO3, FHL1, RAX, NRARP, OTP, NR2E1, DACH2, CELSR2, CHRDL1, EDA2R, CELSR3, SOX2, SMPD3, SOX3, SHH, SIX6, FGF8, ZIC2, ZIC3, ZIC1, PITX2, PITX1, EPHB1, NKX2-9, EOMES, EMX1, ADGRV1, UNC5A, METRN, ISLR2, MITF, PAX6, PROX1, PAX5, OLIG2, SHISA2, MYT1, PAX2, PTP4A1, GAPDH, NGEF, HMX1, CRB2, DLX2, FOXG1, ARX, DBX1, WNT8B, ASCL1, DLL1, FSTL4, DLL3, PRTG, ADGRG1, CDH20, ERBB4, CDH22, …	351	1095	20094	4.4439	2.011e-28	2.011e-28	1.9321e-28
GOTERM_BP_DIRECT	GO:0030182~neuron differentiation	39	8.33333	4.03514e-25	BRSK2, FOXG1, WNT8B, OTP, NR2E1, ASCL1, DLL1, CHRDL1, SOX2, SHH, FGF8, FUT9, ZIC3, OTX2, NKX6-1, PITX2, HES5, NKX2-2, EOMES, EMX1, GSX1, WNT7A, PAX6, ATP2B2, TBR1, OLIG2, BHLHA15, VAX1, POU3F2, VAX2, POU4F1, DAB1, DOK5, LHX2, LHX1, NOVA2, LHX5, LHX4, NEUROG2	351	245	20094	9.11293	9.25662e-22	4.62831e-22	4.44673e-22
GOTERM_BP_DIRECT	GO:0007399~nervous system development	44	9.40171	2.61104e-20	ROBO3, SEMA5B, BRSK2, NRSN1, ARX, SLC1A2, OTP, LRP2, ASCL1, DLL1, CHRDL1, DLL3, ADGRG1, ATCAY, SOX1, ZIC2, FUT9, ERBB4, ZIC3, ZIC1, APOB, EPHB1, HES5, NKX2-2, NTNG2, ADGRV1, METRN, ISLR2, PAX5, ZIC5, OLIG2, VAX1, MYT1, POU3F2, POU4F1, DAB1, LHX2, LHX1, NOVA2, FGF18, ADGRB1, NES, NEUROG2, NGEF	351	438	20094	5.75093	5.98972e-17	1.99657e-17	1.91824e-17
GOTERM_BP_DIRECT	GO:0030154~cell differentiation	62	13.2479	1.54178e-17	TDRKH, SEMA5B, ROBO3, FOXE3, FOXE1, FOXI2, FHL1, OTP, NR2E1, SOX21, CHRDL1, EDA2R, SOX2, RIMS2, SOX3, SOX1, FGF8, ZIC2, ZIC3, ZIC1, NKX2-9, EOMES, NKX6-2, METRN, SOX13, MITF, PAX6, PAX5, MYT1, POU3F2, PAX2, NR5A1, NGEF, MEG3, DLX2, ARX, ILDR2, ASCL1, DLL1, FSTL4, DLL3, ADGRG1, NKX2-1, OTX2, NKX6-1, NKX2-4, NKX2-3, HES5, NKX2-2, NTNG2, FZD5, CDX1, NR0B1, ZIC5, VAX1, DLK1, FGF15, NR6A1, DAB1, LHX1,…	351	1022	20094	3.47296	3.53685e-14	8.84212e-15	8.49522e-15
GOTERM_BP_DIRECT	GO:0006355~regulation of transcription, DNA-templated	67	14.3162	2.75323e-16	FOXE3, FOXE1, FOXI2, RAX, OTP, NR2E1, SOX21, CELSR2, SOX2, SOX3, SHH, SIX6, SOX1, PITX2, PITX1, NKX2-9, EOMES, EMX1, SOX13, MITF, PAX6, TBR1, PROX1, BHLHA15, PAX5, OLIG2, POU3F1, MYT1, POU3F2, PAX2, POU3F4, NR5A1, RFX4, VGLL2, HMX1, DLX2, IGSF1, FOXG1, ARX, DBX1, SCRT2, NKX2-1, OTX2, NKX6-1, NKX2-4, NKX2-3, HES5, NKX2-2, TCFL5, GSX1, CDX1, ZBTB16, GSX2, FOXJ1, ARID3A, POU2F2, VAX1, VAX2, POU4F1, …	351	1237	20094	3.10073	5.0937e-13	1.26318e-13	1.21362e-13
GOTERM_BP_DIRECT	GO:0006357~regulation of transcription from RNA polymerase II promoter	77	16.453	6.24288e-16	FOXE3, FOXE1, ONECUT2, FOXI2, RAX, NR2E1, DACH2, SOX2, SIX6, ZIC2, SALL3, ZIC3, SALL4, ZIC1, PITX2, PITX1, NKX2-9, EOMES, EMX1, GM43517, NKX6-2, PRKCB, SOX13, MITF, PAX6, TBR1, PROX1, BHLHA15, PAX5, OLIG2, POU3F1, MYT1, POU3F2, KLF15, PAX2, POU3F4, NR5A1, TOX2, TAL2, RFX4, VGLL2, HMX1, DLX2, FOXG1, ARX, DBX1, ASCL1, ZSCAN10, NKX2-1, ZIM1, OTX2, NKX6-1, NKX2-4, NKX2-3, HES5, NKX2-2, GSX1, CDX1, ZB…	351	1606	20094	2.74476	1.52811e-12	2.38686e-13	2.29322e-13
GOTERM_BP_DIRECT	GO:0007417~central nervous system development	21	4.48718	1.97313e-14	EMX1, SHC3, GSX1, NCAN, ZBTB16, GSX2, ZIC4, ZIC5, VAX1, VAX2, PAX2, HAPLN1, CYP26A1, SHH, DAB1, CYP26C1, ZIC2, ZIC3, ZIC1, NRCAM, OTX2	351	119	20094	10.1026	4.5334e-11	6.46623e-12	6.21254e-12
GOTERM_BP_DIRECT	GO:0021879~forebrain neuron differentiation	8	1.7094	1.42435e-10	SOX2, DLX2, SOX1, NKX2-1, OTP, LHX5, ASCL1, POU3F4	351	11	20094	41.6348	3.26745e-07	4.08431e-08	3.92407e-08
GOTERM_BP_DIRECT	GO:0045165~cell fate commitment	15	3.20513	1.63205e-10	NKX6-2, ONECUT2, SOX13, WNT7A, WNT8B, PAX6, MITF, NR2E1, SOX2, SHH, FGF8, ERBB4, OTX2, NEUROG2, VSX2	351	83	20094	10.346	3.74391e-07	4.1599e-08	3.9967e-08
GOTERM_BP_DIRECT	GO:0045944~positive regulation of transcription from RNA polymerase II promoter	54	11.5385	6.07813e-10	ONECUT2, RAX, SOX21, SOX2, SOX3, SHH, SOX1, ZIC2, ZIC3, SALL4, ZIC1, PITX2, PITX1, LMO1, NKX2-9, EOMES, MITF, PAX6, TBR1, PROX1, BHLHA15, PAX5, POU3F1, MYT1, POU3F2, KLF15, PAX2, NR5A1, TOX2, RFX4, VGLL2, DLX2, ASCL1, DLL1, GALR1, NKX2-1, OTX2, NKX2-3, HES5, NKX2-2, FZD5, GSX1, CDX1, WNT7A, FOXJ1, ARID3A, ARID3B, POU2F2, POU4F1, NR6A1, LHX2, LHX4, NEUROG2, VSX2	351	1216	20094	2.54226	1.39432e-06	1.39432e-07	1.33962e-07
GOTERM_BP_DIRECT	GO:0030900~forebrain development	15	3.20513	1.04465e-09	FOXG1, ARX, PAX6, LRP2, ZIC5, POU3F1, VAX2, SOX2, SOX3, SHH, SOX1, ZIC3, ZIC1, OTX2, NEUROG2	351	95	20094	9.03914	2.39642e-06	2.17857e-07	2.09309e-07
GOTERM_BP_DIRECT	GO:0000122~negative regulation of transcription from RNA polymerase II promoter	45	9.61538	7.41146e-09	DLX2, MAGEL2, FOXE1, FOXG1, ENO1B, ARX, NRARP, OTP, NR2E1, PRDM12, ASCL1, SOX2, SOX3, SCRT2, SHH, SOX1, SALL4, NKX2-1, NKX6-1, PITX2, HES5, TCFL5, LMO1, EOMES, PLK3, NKX6-2, ZBTB16, SOX13, PAWR, FOXJ1, PAX6, NR0B1, MITF, PAX5, OLIG2, PROX1, POU3F1, VAX1, VAX2, POU4F1, PAX2, SCRT1, NR6A1, VSX2, HMX1	351	975	20094	2.64221	1.70017e-05	1.41682e-06	1.36124e-06
GOTERM_BP_DIRECT	GO:0048663~neuron fate commitment	10	2.13675	8.28441e-09	SOX2, SHH, NKX6-2, GSX1, GSX2, NKX2-1, OTX2, OLIG2, ASCL1, POU3F2	351	36	20094	15.9022	1.90043e-05	1.46188e-06	1.40453e-06
GOTERM_BP_DIRECT	GO:0007405~neuroblast proliferation	11	2.35043	1.0166e-08	SOX2, SHH, DCT, FOXG1, OTP, PAX6, NR2E1, PROX1, ASCL1, VAX1, VSX2	351	49	20094	12.8516	2.33205e-05	1.66577e-06	1.60041e-06
GOTERM_BP_DIRECT	GO:0043010~camera-type eye development	13	2.77778	1.34577e-08	FOXE3, RAX, PAX6, MITF, NR2E1, VAX1, VAX2, PAX2, SHH, PITX2, CRYAB, HES5, VSX2	351	80	20094	9.30278	3.08714e-05	2.05813e-06	1.97738e-06
GOTERM_BP_DIRECT	GO:0021772~olfactory bulb development	9	1.92308	3.27731e-08	EOMES, DLX2, ZIC3, LHX2, ZIC1, ARX, GSX2, PAX6, NR2E1	351	30	20094	17.1744	7.51787e-05	4.69885e-06	4.5145e-06
GOTERM_BP_DIRECT	GO:0009653~anatomical structure morphogenesis	12	2.5641	4.48068e-08	SOX2, EOMES, SOX3, FOXE3, SOX1, FOXE1, ONECUT2, LHX1, FOXI2, PITX2, PITX1, SOX21	351	72	20094	9.54131	0.000102782	6.0166e-06	5.78055e-06
GOTERM_BP_DIRECT	GO:0048709~oligodendrocyte differentiation	11	2.35043	4.72096e-08	DLX2, SHH, NKX6-2, PTPRZ1, NKX2-1, OTX2, OLIG2, NKX6-1, ASCL1, HES5, NKX2-2	351	57	20094	11.0478	0.000108293	6.0166e-06	5.78055e-06
GOTERM_BP_DIRECT	GO:0007420~brain development	21	4.48718	7.51696e-08	EOMES, EMX1, FOXG1, GSX2, RAX, FOXJ1, PAX6, AK4, NR2E1, POU3F1, VAX1, POU3F2, POU3F4, ADGRG1, LHX2, CDH22, ZIC1, NKX2-1, PITX2, NES, HES5	351	273	20094	4.40368	0.000172424	9.07575e-06	8.71968e-06
GOTERM_BP_DIRECT	GO:0001764~neuron migration	16	3.4188	8.42042e-08	EOMES, ROBO3, ITGA3, ARX, PAX6, ASCL1, VAX1, POU4F1, CELSR2, CELSR3, DAB1, SOX1, NKX2-1, NKX6-1, PITX2, NEUROG2	351	154	20094	5.94783	0.000193146	9.65823e-06	9.27931e-06
GOTERM_BP_DIRECT	GO:0045665~negative regulation of neuron differentiation	12	2.5641	1.56314e-07	SOX2, SOX3, SHH, FOXG1, PAX6, OLIG2, NR2E1, ASCL1, SOX21, DLL1, HES5, NKX2-2	351	81	20094	8.48116	0.00035852	1.70754e-05	1.64055e-05
GOTERM_BP_DIRECT	GO:0048708~astrocyte differentiation	8	1.7094	1.68128e-07	EOMES, SHH, DAB1, PAX6, NR2E1, VAX1, HES5, NKX2-2	351	25	20094	18.3193	0.000385611	1.75311e-05	1.68433e-05
GOTERM_BP_DIRECT	GO:0007411~axon guidance	17	3.63248	2.04556e-07	MEG3, ROBO3, SEMA5B, UNC5A, CNTN6, ARX, PAX6, VAX1, PRTG, SHH, LHX2, RTN4RL1, NKX2-1, NRCAM, OTX2, EPHB1, NEUROG2	351	188	20094	5.17667	0.000469141	2.04022e-05	1.96018e-05
GOTERM_BP_DIRECT	GO:0009887~animal organ morphogenesis	15	3.20513	6.74733e-07	NTNG2, CDX1, WNT7A, WNT8B, PAX5, DLL1, SOX3, FGF15, FGF8, TH, FGF18, NKX2-1, OTX2, LHX4, PITX2	351	157	20094	5.46954	0.00154664	6.44933e-05	6.1963e-05
GOTERM_BP_DIRECT	GO:0021537~telencephalon development	8	1.7094	8.40598e-07	EMX1, FGF8, LHX2, RFX4, LHX1, NKX2-1, SLC1A2, HES5	351	31	20094	14.7736	0.00192647	7.71333e-05	7.41071e-05
GOTERM_BP_DIRECT	GO:0048665~neuron fate specification	7	1.49573	1.57724e-06	GSX2, OTX2, ASCL1, POU3F2, POU4F1, DLL1, NKX2-2	351	22	20094	18.2152	0.00361165	0.000139161	0.000133701
GOTERM_BP_DIRECT	GO:0021987~cerebral cortex development	11	2.35043	2.22143e-06	SOX2, EOMES, EMX1, TH, LHX2, FOXG1, PAX6, TBR1, NR2E1, PAX5, ASCL1	351	85	20094	7.40855	0.00508301	0.00018874	0.000181335
GOTERM_BP_DIRECT	GO:0021978~telencephalon regionalization	5	1.06838	5.99353e-06	SHH, LHX2, GSX2, OTX2, PAX6	351	8	20094	35.7799	0.0136551	0.000491041	0.000471777
GOTERM_BP_DIRECT	GO:0007389~pattern specification process	9	1.92308	7.99877e-06	SHH, ZIC3, CDX1, LHX1, ZIC1, GSX2, RAX, NKX2-1, ASCL1	351	59	20094	8.73272	0.0181819	0.000632731	0.000607907
GOTERM_BP_DIRECT	GO:0022008~neurogenesis	10	2.13675	1.40897e-05	EOMES, LHX2, FABP7, FOXG1, PRDM12, HAP1, NKX6-1, ASCL1, EPHB1, NEUROG2	351	83	20094	6.89733	0.0318052	0.00107739	0.00103512
GOTERM_BP_DIRECT	GO:0048714~positive regulation of oligodendrocyte differentiation	7	1.49573	1.99171e-05	SHH, NKX6-2, PTPRZ1, GSX2, OLIG2, NKX6-1, NKX2-2	351	33	20094	12.1435	0.0446621	0.00147386	0.00141604
GOTERM_BP_DIRECT	GO:0045893~positive regulation of transcription, DNA-templated	30	6.41026	2.22489e-05	MEG3, FOXE1, MSTN, SOX2, SHH, ZIC2, ERBB4, ZIC3, ZIC1, NKX2-1, OTX2, PITX2, HES5, EOMES, KCNH2, ZBTB16, WNT7A, FOXJ1, PAX6, MITF, PAX5, POU2F2, POU3F1, MT3, KLF15, PAX2, NR5A1, LHX2, LHX1, LHX5	351	712	20094	2.41213	0.0497588	0.00159496	0.00153239
GOTERM_BP_DIRECT	GO:0002052~positive regulation of neuroblast proliferation	7	1.49573	2.38327e-05	SOX2, SHH, DCT, FOXG1, OTP, PAX6, NR2E1	351	34	20094	11.7863	0.0532051	0.00165673	0.00159173
GOTERM_BP_DIRECT	GO:0071542~dopaminergic neuron differentiation	7	1.49573	2.83447e-05	SHH, FGF8, OTP, OTX2, PAX5, NEUROG2, PAX2	351	35	20094	11.4496	0.0629547	0.00191243	0.0018374
GOTERM_BP_DIRECT	GO:0010001~glial cell differentiation	6	1.28205	3.21499e-05	CRB1, METRN, ASCL1, POU3F1, KLF15, PAX2	351	22	20094	15.6131	0.071099	0.0021072	0.00202453
GOTERM_BP_DIRECT	GO:0010628~positive regulation of gene expression	26	5.55556	3.54573e-05	PTGFR, TFRC, ARX, WNT8B, DLL1, RIMS2, SHH, TRIM6, FGF8, NKX2-1, APOB, NKX2-2, ITGA3, WNT7A, PAWR, PAX6, MITF, POU3F1, MYT1, MT3, POU4F1, ACTA2, NR5A1, FGF15, RNF207, FGF18	351	583	20094	2.55308	0.0781202	0.00225942	0.00217077
GOTERM_BP_DIRECT	GO:0009953~dorsal/ventral pattern formation	8	1.7094	4.01476e-05	SHH, FGF8, LHX2, LHX1, FOXG1, WNT7A, OTX2, PAX6	351	54	20094	8.48116	0.0879865	0.00248915	0.0023915
GOTERM_BP_DIRECT	GO:0042472~inner ear morphogenesis	9	1.92308	4.33429e-05	SOX2, FGF8, FOXG1, ZIC1, ATP2B2, OTX2, OTOP1, DLL1, PAX2	351	74	20094	6.96258	0.0946474	0.00261654	0.00251389
GOTERM_BP_DIRECT	GO:0021529~spinal cord oligodendrocyte cell differentiation	4	0.854701	5.10527e-05	SOX13, OLIG2, ASCL1, NKX2-2	351	5	20094	45.7983	0.11052	0.00300294	0.00288513
GOTERM_BP_DIRECT	GO:0021527~spinal cord association neuron differentiation	5	1.06838	5.71299e-05	GSX1, LHX1, GSX2, LHX5, ASCL1	351	13	20094	22.0184	0.122835	0.0032764	0.00314786
GOTERM_BP_DIRECT	GO:0007219~Notch signaling pathway	11	2.35043	7.78859e-05	SOX2, DLX2, KRT19, CNTN6, GSX2, NRARP, DTX4, ASCL1, DLL1, HES5, DLL3	351	127	20094	4.95848	0.163624	0.00435781	0.00418684
GOTERM_BP_DIRECT	GO:0007267~cell-cell signaling	9	1.92308	8.32353e-05	SHH, GJB3, LHX1, WNT7A, WNT8B, LHX5, BHLHA15, CXCL13, DLL1	351	81	20094	6.36087	0.173826	0.00454624	0.00436787
GOTERM_BP_DIRECT	GO:0021846~cell proliferation in forebrain	5	1.06838	0.000139525	FGF8, FABP7, ARX, WNT7A, LHX5	351	16	20094	17.89	0.273919	0.00744351	0.00715148
GOTERM_BP_DIRECT	GO:0045666~positive regulation of neuron differentiation	10	2.13675	0.00015148	SOX2, SHH, LIN28A, DAB1, FOXG1, VWC2, NKX6-1, ASCL1, NEUROG2, NKX2-2	351	112	20094	5.11142	0.293564	0.00789763	0.00758779
GOTERM_BP_DIRECT	GO:0060041~retina development in camera-type eye	9	1.92308	0.00016203	CRB1, LHX2, LHX1, RPL24, PAX6, NR2E1, VAX2, DLL1, SLC4A5	351	89	20094	5.78911	0.310457	0.00825992	0.00793586
GOTERM_BP_DIRECT	GO:0021798~forebrain dorsal/ventral pattern formation	4	0.854701	0.000174095	FGF8, GSX2, NKX2-1, PAX6	351	7	20094	32.7131	0.329283	0.00868202	0.0083414
GOTERM_BP_DIRECT	GO:2000179~positive regulation of neural precursor cell proliferation	6	1.28205	0.000213104	ADGRG1, LHX2, NR2E1, PROX1, ASCL1, NES	351	32	20094	10.734	0.386707	0.0104013	0.00999323
GOTERM_BP_DIRECT	GO:0060563~neuroepithelial cell differentiation	5	1.06838	0.000228211	EMX1, FGF8, OTX2, VAX1, DLL1	351	18	20094	15.9022	0.407601	0.0109066	0.0104787
GOTERM_BP_DIRECT	GO:0048839~inner ear development	8	1.7094	0.000234122	SOX2, SHH, ADGRV1, H2-K1, ATP2B2, PROX1, DLL1, POU3F4	351	71	20094	6.45046	0.415582	0.0109607	0.0105307
GOTERM_BP_DIRECT	GO:0098609~cell-cell adhesion	13	2.77778	0.000277775	ADGRV1, ITGA3, TTYH1, CELSR2, CELSR3, VNN1, CDH20, CDH22, IGDCC3, PKP2, NRCAM, TJP3, JAM2	351	206	20094	3.61273	0.471284	0.0127443	0.0122443
GOTERM_BP_DIRECT	GO:0001709~cell fate determination	5	1.06838	0.000285115	PAX6, PROX1, CHRDL1, PAX2, DLL3	351	19	20094	15.0652	0.480115	0.0128246	0.0123214
GOTERM_BP_DIRECT	GO:0035116~embryonic hindlimb morphogenesis	6	1.28205	0.000329156	SHH, FGF8, ZBTB16, WNT7A, PITX2, PITX1	351	35	20094	9.81392	0.530087	0.0145208	0.0139511
GOTERM_BP_DIRECT	GO:0007601~visual perception	11	2.35043	0.000340677	TRPM1, CRB1, ADGRV1, ZIC2, TH, ABCA4, RRH, NR2E1, VAX2, CPLX3, VSX2	351	152	20094	4.14294	0.542348	0.0147455	0.014167
GOTERM_BP_DIRECT	GO:0009952~anterior/posterior pattern specification	10	2.13675	0.000389172	CYP26A1, SHH, CYP26C1, ZIC3, CDX1, LHX1, ZBTB16, OTX2, PAX6, HES5	351	127	20094	4.50771	0.590548	0.0165326	0.015884
GOTERM_BP_DIRECT	GO:0021796~cerebral cortex regionalization	4	0.854701	0.000407113	EOMES, EMX1, ADGRG1, PAX6	351	9	20094	25.4435	0.607063	0.0169803	0.0163141
GOTERM_BP_DIRECT	GO:0061351~neural precursor cell proliferation	6	1.28205	0.000429561	CNTNAP2, ADGRG1, PAX6, NR2E1, ASCL1, EPHB1	351	37	20094	9.28344	0.626794	0.0175966	0.0169063
GOTERM_BP_DIRECT	GO:0048646~anatomical structure formation involved in morphogenesis	5	1.06838	0.000516341	SOX2, SHH, LHX2, LHX1, NKX2-1	351	22	20094	13.0109	0.69419	0.0207804	0.0199652
GOTERM_BP_DIRECT	GO:0061101~neuroendocrine cell differentiation	4	0.854701	0.000574094	OTP, ASCL1, POU3F2, NKX2-2	351	10	20094	22.8991	0.732156	0.0227064	0.0218156
GOTERM_BP_DIRECT	GO:0045892~negative regulation of transcription, DNA-templated	25	5.34188	0.000617283	MEG3, MAGEL2, FOXG1, ENO1B, ASCL1, TRIM6, ZIC2, ZSCAN10, NKX2-1, PITX1, HES5, DUSP5, NKX6-2, ZBTB16, SOX13, NR0B1, TBR1, PAX5, PROX1, POU3F1, MT3, PAX2, LHX1, CRYAB, HMX1	351	662	20094	2.16193	0.757435	0.0233669	0.0224501
GOTERM_BP_DIRECT	GO:0045746~negative regulation of Notch signaling pathway	6	1.28205	0.00062135	MEG3, DLX2, NRARP, DLL1, DLK1, DLL3	351	40	20094	8.58718	0.759689	0.0233669	0.0224501
GOTERM_BP_DIRECT	GO:0045747~positive regulation of Notch signaling pathway	6	1.28205	0.00062135	SOX2, CNTN6, GSX2, ASCL1, DLL1, HES5	351	40	20094	8.58718	0.759689	0.0233669	0.0224501
GOTERM_BP_DIRECT	GO:0030324~lung development	10	2.13675	0.000641377	SMPD3, NKX2-9, SHH, FGF8, ITGA3, ZIC3, FGF18, NKX2-1, PROX1, PITX2	351	136	20094	4.2094	0.770486	0.023731	0.0227999
GOTERM_BP_DIRECT	GO:0010467~gene expression	13	2.77778	0.00069104	EOMES, CRB1, RTL1, CNTNAP2, WNT8B, PAX6, TBR1, SOX2, SHH, ZIC2, ZIC3, ZIC1, NKX2-1	351	228	20094	3.26413	0.795215	0.0251626	0.0241754
GOTERM_BP_DIRECT	GO:0021954~central nervous system neuron development	5	1.06838	0.000729737	FGF8, NOVA2, FOXG1, ASCL1, NEUROG2	351	24	20094	11.9266	0.812622	0.0261565	0.0251303
GOTERM_BP_DIRECT	GO:0021707~cerebellar granule cell differentiation	4	0.854701	0.000779215	WNT7A, ATP2B2, PROX1, CBLN1	351	11	20094	20.8174	0.832742	0.0275003	0.0264214
GOTERM_BP_DIRECT	GO:0009791~post-embryonic development	9	1.92308	0.00081898	MEG3, EMX1, TAL2, LHX1, APOB, MYT1, NKX2-3, DLK1, LLGL2	351	113	20094	4.55956	0.847335	0.0284658	0.027349
GOTERM_BP_DIRECT	GO:0007409~axonogenesis	9	1.92308	0.000867707	NKX2-9, NTNG2, CNTNAP2, BRSK2, DAB1, PTPRZ1, METRN, PAX6, VAX2	351	114	20094	4.51957	0.863494	0.0297092	0.0285437
GOTERM_BP_DIRECT	GO:0021530~spinal cord oligodendrocyte cell fate specification	3	0.641026	0.000897139	OLIG2, ASCL1, NKX2-2	351	3	20094	57.2479	0.872413	0.0302652	0.0290779
GOTERM_BP_DIRECT	GO:0007155~cell adhesion	23	4.91453	0.000927477	CNTNAP2, SPON1, CNTN6, ITGA3, TTYH1, NCAN, NRXN3, CELSR2, HAPLN1, CELSR3, IGSF11, PRTG, CLDN10, ADGRG1, DAB1, IBSP, CDH20, CDH22, CYP1B1, NRCAM, FOLR1, EPHB1, HES5	351	602	20094	2.18721	0.880998	0.0305038	0.0293071
GOTERM_BP_DIRECT	GO:0021549~cerebellum development	7	1.49573	0.000930806	CNTNAP2, LHX1, ATP2B2, LHX5, CKB, HAP1, MYO16	351	65	20094	6.16515	0.881905	0.0305038	0.0293071
GOTERM_BP_DIRECT	GO:0048469~cell maturation	6	1.28205	0.00107461	FZD5, BHLHA15, ASCL1, POU2F2, NEUROG2, HES5	351	45	20094	7.63305	0.915118	0.0347206	0.0333584
GOTERM_BP_DIRECT	GO:0031018~endocrine pancreas development	5	1.06838	0.00115668	NKX6-2, ONECUT2, NKX6-1, MYT1, NKX2-2	351	27	20094	10.6015	0.929698	0.0363481	0.0349221
GOTERM_BP_DIRECT	GO:2001222~regulation of neuron migration	5	1.06838	0.00115668	NTNG2, SCRT2, CAMK2A, NKX6-1, SCRT1	351	27	20094	10.6015	0.929698	0.0363481	0.0349221
GOTERM_BP_DIRECT	GO:0001501~skeletal system development	9	1.92308	0.00121113	SMPD3, WFIKKN1, ZIC3, ZBTB16, NCAN, ZIC1, PITX1, HAPLN1, DLL3	351	120	20094	4.29359	0.937962	0.037545	0.036072
GOTERM_BP_DIRECT	GO:0001947~heart looping	7	1.49573	0.00127467	EOMES, SHH, FGF8, ZIC3, TBR1, FOLR1, DLL1	351	69	20094	5.80775	0.946387	0.0377398	0.0362592
GOTERM_BP_DIRECT	GO:0006836~neurotransmitter transport	6	1.28205	0.00131147	RIMS2, RIMS3, SLC32A1, SLC6A13, SLC6A1, CPLX3	351	47	20094	7.30824	0.950732	0.0377398	0.0362592
GOTERM_BP_DIRECT	GO:0050767~regulation of neurogenesis	6	1.28205	0.00131147	SOX2, PAX6, ASCL1, POU4F1, DLL1, HES5	351	47	20094	7.30824	0.950732	0.0377398	0.0362592
GOTERM_BP_DIRECT	GO:0097475~motor neuron migration	4	0.854701	0.00131612	DAB1, ASCL1, CELSR2, CELSR3	351	13	20094	17.6147	0.951256	0.0377398	0.0362592
GOTERM_BP_DIRECT	GO:0097154~GABAergic neuron differentiation	4	0.854701	0.00131612	DLX2, GSX2, NKX2-1, ASCL1	351	13	20094	17.6147	0.951256	0.0377398	0.0362592
GOTERM_BP_DIRECT	GO:0007406~negative regulation of neuroblast proliferation	4	0.854701	0.00131612	PAX6, PROX1, VAX1, VSX2	351	13	20094	17.6147	0.951256	0.0377398	0.0362592
GOTERM_BP_DIRECT	GO:0048863~stem cell differentiation	7	1.49573	0.00137409	SOX2, LIN28A, ZIC3, ZSCAN10, A2M, SOX21, PAX2	351	70	20094	5.72479	0.957333	0.0389156	0.0373888
GOTERM_BP_DIRECT	GO:0021892~cerebral cortex GABAergic interneuron differentiation	3	0.641026	0.00177359	DLX2, NKX2-1, ASCL1	351	4	20094	42.9359	0.982961	0.0484359	0.0465356
GOTERM_BP_DIRECT	GO:0045686~negative regulation of glial cell differentiation	3	0.641026	0.00177359	NKX6-2, LIN28A, NKX6-1	351	4	20094	42.9359	0.982961	0.0484359	0.0465356
GOTERM_BP_DIRECT	GO:0021979~hypothalamus cell differentiation	3	0.641026	0.00177359	OTP, HAP1, POU3F2	351	4	20094	42.9359	0.982961	0.0484359	0.0465356
GOTERM_BP_DIRECT	GO:0007224~smoothened signaling pathway	8	1.7094	0.00194314	DISP2, SHH, SALL3, ZIC3, PAX6, NKX6-1, HES5, NKX2-2	351	101	20094	4.53448	0.98846	0.0523709	0.0503163
GOTERM_BP_DIRECT	GO:0050768~negative regulation of neurogenesis	5	1.06838	0.00196334	PRTG, LHX2, WNT7A, MT3, DLL3	351	31	20094	9.23353	0.988983	0.0523709	0.0503163
GOTERM_BP_DIRECT	GO:0021794~thalamus development	4	0.854701	0.00204041	CNTNAP2, SHH, TAL2, OLIG2	351	15	20094	15.2661	0.990772	0.0535916	0.0514891
GOTERM_BP_DIRECT	GO:0001843~neural tube closure	8	1.7094	0.00205583	TRIM71, CECR2, ZIC2, LHX2, SALL4, LRP2, ZIC5, PAX2	351	102	20094	4.49003	0.991093	0.0535916	0.0514891
GOTERM_BP_DIRECT	GO:0021983~pituitary gland development	5	1.06838	0.00221337	SOX3, NKX2-1, PAX6, PITX2, PITX1	351	32	20094	8.94498	0.993799	0.0570503	0.0548121
GOTERM_BP_DIRECT	GO:0007507~heart development	14	2.99145	0.00227858	ITGA3, FOXJ1, LRP2, ASCL1, POU4F1, SHH, FGF15, FGF8, TH, ERBB4, ZIC3, SALL4, PKP2, PITX2	351	298	20094	2.6895	0.994663	0.0580784	0.0557998
GOTERM_BP_DIRECT	GO:0035137~hindlimb morphogenesis	4	0.854701	0.00247908	SALL3, ZBTB16, WNT7A, PITX1	351	16	20094	14.312	0.996634	0.0618153	0.0593902
GOTERM_BP_DIRECT	GO:0021854~hypothalamus development	4	0.854701	0.00247908	SOX3, GSX1, RAX, NKX2-1	351	16	20094	14.312	0.996634	0.0618153	0.0593902
GOTERM_BP_DIRECT	GO:0021521~ventral spinal cord interneuron specification	3	0.641026	0.00292195	SHH, SOX1, DBX1	351	5	20094	34.3487	0.998785	0.0710124	0.0682264
GOTERM_BP_DIRECT	GO:0021544~subpallium development	3	0.641026	0.00292195	DLX2, FGF8, GSX2	351	5	20094	34.3487	0.998785	0.0710124	0.0682264
GOTERM_BP_DIRECT	GO:0060042~retina morphogenesis in camera-type eye	4	0.854701	0.00297175	SOX2, CRB1, DLL1, VSX2	351	17	20094	13.4701	0.998916	0.0710124	0.0682264
GOTERM_BP_DIRECT	GO:0048712~negative regulation of astrocyte differentiation	4	0.854701	0.00297175	DAB1, NR2E1, HES5, DLL3	351	17	20094	13.4701	0.998916	0.0710124	0.0682264
GOTERM_BP_DIRECT	GO:0016055~Wnt signaling pathway	12	2.5641	0.00306455	SOX2, FZD5, CCDC88C, FZD8, WNT7A, WNT8B, MITF, PITX2, CPZ, VAX2, CELSR2, TMEM198	351	237	20094	2.89863	0.999125	0.0724751	0.0696317
GOTERM_BP_DIRECT	GO:0048167~regulation of synaptic plasticity	6	1.28205	0.00335326	IGSF11, RIMS2, RIMS3, ADGRB1, ATP2B2, CHRDL1	351	58	20094	5.92219	0.99955	0.0784937	0.0754142
GOTERM_BP_DIRECT	GO:0048715~negative regulation of oligodendrocyte differentiation	4	0.854701	0.00352046	DLX2, NKX6-2, NKX6-1, HES5	351	18	20094	12.7217	0.999693	0.0807593	0.0775909
GOTERM_BP_DIRECT	GO:0021895~cerebral cortex neuron differentiation	4	0.854701	0.00352046	EOMES, EMX1, NKX2-1, NR2E1	351	18	20094	12.7217	0.999693	0.0807593	0.0775909
GOTERM_BP_DIRECT	GO:0030010~establishment of cell polarity	5	1.06838	0.00418658	CRB2, SHH, BRSK2, WNT7A, EPHB1	351	38	20094	7.53261	0.999934	0.0950892	0.0913586
GOTERM_BP_DIRECT	GO:0006811~ion transport	21	4.48718	0.00438519	KCNG1, CLIC6, KCNH2, SLC13A3, KCNJ12, TTYH1, CHRNA6, GRIK3, MLC1, ATP2B2, OTOP1, ATP2C2, GRIK2, CP, SLC4A5, TRPM1, CLDN10, ASIC4, SCN11A, SLCO4A1, SLC38A8	351	599	20094	2.00702	0.999958	0.0986238	0.0947545
GOTERM_BP_DIRECT	GO:0001708~cell fate specification	5	1.06838	0.00460202	SOX2, EOMES, SHH, OTX2, TBR1	351	39	20094	7.33947	0.999975	0.102347	0.0983315
GOTERM_BP_DIRECT	GO:0032355~response to estradiol	8	1.7094	0.00463996	PTGFR, TH, WNT7A, WFDC1, APOB, GGT1, SLC6A1, CRYAB	351	118	20094	3.88121	0.999977	0.102347	0.0983315
GOTERM_BP_DIRECT	GO:0031290~retinal ganglion cell axon guidance	4	0.854701	0.00479336	ZIC2, RPL24, NRCAM, EPHB1	351	20	20094	11.4496	0.999984	0.103748	0.0996779
GOTERM_BP_DIRECT	GO:0048856~anatomical structure development	6	1.28205	0.00479395	SHH, OTX2, PAX6, NR2E1, PAX5, PAX2	351	63	20094	5.45218	0.999984	0.103748	0.0996779
GOTERM_BP_DIRECT	GO:0006096~glycolytic process	5	1.06838	0.00504431	PKLR, ENO1B, ENO3, GAPDH, ENO4	351	40	20094	7.15598	0.999991	0.108146	0.103903
GOTERM_BP_DIRECT	GO:0021766~hippocampus development	7	1.49573	0.00515689	DLX2, DAB1, SLC32A1, ZIC3, ZIC1, NKX2-1, LHX5	351	91	20094	4.40368	0.999993	0.109536	0.105239
GOTERM_BP_DIRECT	GO:0051216~cartilage development	7	1.49573	0.00543783	SMPD3, DLX2, ZBTB16, WNT7A, PITX1, HES5, MATN3	351	92	20094	4.35582	0.999996	0.114444	0.109954
GOTERM_BP_DIRECT	GO:0030334~regulation of cell migration	8	1.7094	0.00555961	FRMD5, FGF15, FGF8, ERBB4, GSX2, FGF18, PAX6, PITX2	351	122	20094	3.75396	0.999997	0.115943	0.111394
GOTERM_BP_DIRECT	GO:0021902~commitment of neuronal cell to specific neuron type in forebrain	3	0.641026	0.0059959	PAX6, TBR1, ASCL1	351	7	20094	24.5348	0.999999	0.122809	0.117991
GOTERM_BP_DIRECT	GO:0061072~iris morphogenesis	3	0.641026	0.0059959	FOXE3, PAX6, PITX2	351	7	20094	24.5348	0.999999	0.122809	0.117991
GOTERM_BP_DIRECT	GO:0010975~regulation of neuron projection development	5	1.06838	0.0070969	NTNG2, BRSK2, NRCAM, PAX6, TBR1	351	44	20094	6.50544	1	0.144073	0.138421
GOTERM_BP_DIRECT	GO:0048311~mitochondrion distribution	3	0.641026	0.00790288	ATCAY, HAP1, SLC4A5	351	8	20094	21.4679	1	0.159028	0.152789
GOTERM_BP_DIRECT	GO:0007612~learning	6	1.28205	0.00840985	CNTNAP2, TH, NRXN3, AMPH, SORCS3, SLC6A1	351	72	20094	4.77066	1	0.167758	0.161177
GOTERM_BP_DIRECT	GO:0006366~transcription from RNA polymerase II promoter	11	2.35043	0.00889869	NR5A1, NKX2-9, FOXE3, GSX1, LHX1, SP6, PAX6, PROX1, NKX6-1, NKX2-3, POU3F4	351	237	20094	2.65707	1	0.175979	0.169075
GOTERM_BP_DIRECT	GO:0035567~non-canonical Wnt signaling pathway	4	0.854701	0.00907019	FZD5, CCDC88C, FZD8, WNT7A	351	25	20094	9.15966	1	0.177838	0.170861
GOTERM_BP_DIRECT	GO:0048935~peripheral nervous system neuron development	3	0.641026	0.0100445	ONECUT2, ASCL1, POU4F1	351	9	20094	19.0826	1	0.191918	0.184389
GOTERM_BP_DIRECT	GO:0003310~pancreatic A cell differentiation	3	0.641026	0.0100445	NKX6-2, PAX6, NKX6-1	351	9	20094	19.0826	1	0.191918	0.184389
GOTERM_BP_DIRECT	GO:0048664~neuron fate determination	3	0.641026	0.0100445	FOXG1, OTX2, PROX1	351	9	20094	19.0826	1	0.191918	0.184389
GOTERM_BP_DIRECT	GO:0097150~neuronal stem cell population maintenance	4	0.854701	0.010123	SOX2, PROX1, DLL1, HES5	351	26	20094	8.80736	1	0.191918	0.184389
GOTERM_BP_DIRECT	GO:2000300~regulation of synaptic vesicle exocytosis	6	1.28205	0.0104999	RIMS2, RIMS3, PRKCB, CHRNA6, NRXN3, WNT7A	351	76	20094	4.51957	1	0.195827	0.188144
GOTERM_BP_DIRECT	GO:0019827~stem cell population maintenance	6	1.28205	0.0104999	SOX2, EOMES, LIN28A, ZIC3, SALL4, MIAT	351	76	20094	4.51957	1	0.195827	0.188144
GOTERM_BP_DIRECT	GO:0021554~optic nerve development	3	0.641026	0.0124121	RPL24, PAX2, NKX2-2	351	10	20094	17.1744	1	0.2211	0.212426
GOTERM_BP_DIRECT	GO:1902667~regulation of axon guidance	3	0.641026	0.0124121	NOVA2, TBR1, ZSWIM5	351	10	20094	17.1744	1	0.2211	0.212426
GOTERM_BP_DIRECT	GO:0048382~mesendoderm development	3	0.641026	0.0124121	EOMES, LHX1, OTX2	351	10	20094	17.1744	1	0.2211	0.212426
GOTERM_BP_DIRECT	GO:0021517~ventral spinal cord development	3	0.641026	0.0124121	DAB1, LHX1, PAX6	351	10	20094	17.1744	1	0.2211	0.212426
GOTERM_BP_DIRECT	GO:0060019~radial glial cell differentiation	3	0.641026	0.0124121	EMX1, METRN, MIAT	351	10	20094	17.1744	1	0.2211	0.212426
GOTERM_BP_DIRECT	GO:0050678~regulation of epithelial cell proliferation	4	0.854701	0.0124333	ARX, WNT7A, HES5, NKX2-3	351	28	20094	8.17827	1	0.2211	0.212426
GOTERM_BP_DIRECT	GO:0001755~neural crest cell migration	5	1.06838	0.0127022	SEMA5B, SHH, FGF15, ERBB4, PAX6	351	52	20094	5.5046	1	0.224145	0.215351
GOTERM_BP_DIRECT	GO:0031122~cytoplasmic microtubule organization	5	1.06838	0.0144436	PLK3, CCDC88C, STMN3, FIGNL2, SLAIN1	351	54	20094	5.30073	1	0.252929	0.243006
GOTERM_BP_DIRECT	GO:0000578~embryonic axis specification	3	0.641026	0.0149972	FZD5, WNT7A, CHRDL1	351	11	20094	15.6131	1	0.253367	0.243426
GOTERM_BP_DIRECT	GO:0090009~primitive streak formation	3	0.641026	0.0149972	ZIC3, LHX1, OTX2	351	11	20094	15.6131	1	0.253367	0.243426
GOTERM_BP_DIRECT	GO:0009880~embryonic pattern specification	4	0.854701	0.0150209	ZIC3, ERBB4, LHX1, ZBTB16	351	30	20094	7.63305	1	0.253367	0.243426
GOTERM_BP_DIRECT	GO:0014003~oligodendrocyte development	4	0.854701	0.0150209	SHH, ASCL1, HES5, NKX2-2	351	30	20094	7.63305	1	0.253367	0.243426
GOTERM_BP_DIRECT	GO:0030878~thyroid gland development	4	0.854701	0.0150209	SHH, FGF8, FOXE1, NKX2-1	351	30	20094	7.63305	1	0.253367	0.243426
GOTERM_BP_DIRECT	GO:0010468~regulation of gene expression	16	3.4188	0.0162619	EOMES, FOXG1, PAX6, MITF, TBR1, PRDM12, PROX1, ASCL1, KLF15, DLK1, SLC4A5, SOX2, SHH, TRIM6, LHX1, NOVA2	351	462	20094	1.98261	1	0.272298	0.261615
GOTERM_BP_DIRECT	GO:0007368~determination of left/right symmetry	6	1.28205	0.0164421	SHH, FGF8, ZIC3, FOXJ1, PITX2, DLL1	351	85	20094	4.04103	1	0.273319	0.262596
GOTERM_BP_DIRECT	GO:1904936~interneuron migration	3	0.641026	0.0177916	SOX1, ARX, NKX2-1	351	12	20094	14.312	1	0.291527	0.28009
GOTERM_BP_DIRECT	GO:0001823~mesonephros development	3	0.641026	0.0177916	LHX1, ZBTB16, PAX2	351	12	20094	14.312	1	0.291527	0.28009
GOTERM_BP_DIRECT	GO:0007269~neurotransmitter secretion	4	0.854701	0.01943	RIMS2, PTPRN2, NRXN3, WNT7A	351	33	20094	6.93913	1	0.316117	0.303715
GOTERM_BP_DIRECT	GO:0006887~exocytosis	7	1.49573	0.020065	RIMS2, BRSK2, RIMS3, SCRN1, HAP1, CPLX3, LLGL2	351	122	20094	3.28471	1	0.324149	0.311431
GOTERM_BP_DIRECT	GO:0030949~positive regulation of vascular endothelial growth factor receptor signaling pathway	3	0.641026	0.0207871	PRKCB, FGF18, MT3	351	13	20094	13.211	1	0.328866	0.315964
GOTERM_BP_DIRECT	GO:0048339~paraxial mesoderm development	3	0.641026	0.0207871	ZIC2, ZIC3, DLL3	351	13	20094	13.211	1	0.328866	0.315964
GOTERM_BP_DIRECT	GO:0033327~Leydig cell differentiation	3	0.641026	0.0207871	NR5A1, NKX2-1, NR0B1	351	13	20094	13.211	1	0.328866	0.315964
GOTERM_BP_DIRECT	GO:0043066~negative regulation of apoptotic process	20	4.2735	0.022055	PTGFR, PLK3, FOXE3, DYRK3, TFRC, WNT7A, MITF, LRP2, NR2E1, ASCL1, POU4F1, MT3, PAX2, SHH, FGF8, NUAK2, KRT18, ERBB4, LHX4, CRYAB	351	657	20094	1.74271	1	0.346535	0.332939
GOTERM_BP_DIRECT	GO:0031016~pancreas development	4	0.854701	0.0227242	SHH, ONECUT2, ILDR2, PAX2	351	35	20094	6.54261	1	0.354621	0.340708
GOTERM_BP_DIRECT	GO:0035136~forelimb morphogenesis	3	0.641026	0.023976	SALL3, ZBTB16, WNT7A	351	14	20094	12.2674	1	0.366252	0.351883
GOTERM_BP_DIRECT	GO:0003309~type B pancreatic cell differentiation	3	0.641026	0.023976	PAX6, NKX6-1, NKX2-2	351	14	20094	12.2674	1	0.366252	0.351883
GOTERM_BP_DIRECT	GO:0030326~embryonic limb morphogenesis	5	1.06838	0.0241081	SHH, SALL4, ZBTB16, WNT7A, SP9	351	63	20094	4.54348	1	0.366252	0.351883
GOTERM_BP_DIRECT	GO:0043491~protein kinase B signaling	5	1.06838	0.0241081	SMPD3, PLK3, CNTNAP2, MT3, PAX2	351	63	20094	4.54348	1	0.366252	0.351883
GOTERM_BP_DIRECT	GO:0010259~multicellular organism aging	4	0.854701	0.0263027	NR5A1, TH, SLC1A2, CRYAB	351	37	20094	6.18896	1	0.396963	0.381389
GOTERM_BP_DIRECT	GO:0031076~embryonic camera-type eye development	3	0.641026	0.0273507	FZD5, PITX2, NES	351	15	20094	11.4496	1	0.397946	0.382333
GOTERM_BP_DIRECT	GO:0070986~left/right axis specification	3	0.641026	0.0273507	ZIC3, PITX2, DLL1	351	15	20094	11.4496	1	0.397946	0.382333
GOTERM_BP_DIRECT	GO:0071482~cellular response to light stimulus	3	0.641026	0.0273507	TRPM1, CRB1, RRH	351	15	20094	11.4496	1	0.397946	0.382333
GOTERM_BP_DIRECT	GO:0032525~somite rostral/caudal axis specification	3	0.641026	0.0273507	LHX1, NRARP, OTX2	351	15	20094	11.4496	1	0.397946	0.382333
GOTERM_BP_DIRECT	GO:0030858~positive regulation of epithelial cell differentiation	3	0.641026	0.0273507	SOX2, PAX6, NKX2-2	351	15	20094	11.4496	1	0.397946	0.382333
GOTERM_BP_DIRECT	GO:0042493~response to drug	12	2.5641	0.0274086	EMX1, FABP3, DAB1, ITGA3, PRKCB, ALDH1A1, SLC1A2, GAD2, WFDC1, AK4, NKX6-1, ENO3	351	324	20094	2.12029	1	0.397946	0.382333
GOTERM_BP_DIRECT	GO:0001525~angiogenesis	11	2.35043	0.0276226	RTL1, SHH, ADGRG1, FZD5, FGF18, NRXN3, FZD8, WNT7A, CYP1B1, NR2E1, EPHB1	351	284	20094	2.21735	1	0.39853	0.382895
GOTERM_BP_DIRECT	GO:0042475~odontogenesis of dentin-containing tooth	5	1.06838	0.0308299	DLX2, SHH, PITX2, DLL1, NKX2-3	351	68	20094	4.2094	1	0.434929	0.417865
GOTERM_BP_DIRECT	GO:0001706~endoderm formation	3	0.641026	0.0309038	EOMES, DUSP5, LHX1	351	16	20094	10.734	1	0.434929	0.417865
GOTERM_BP_DIRECT	GO:0070593~dendrite self-avoidance	3	0.641026	0.0309038	PRTG, CNTN6, NRCAM	351	16	20094	10.734	1	0.434929	0.417865
GOTERM_BP_DIRECT	GO:0002064~epithelial cell development	3	0.641026	0.0309038	ONECUT2, PAX6, SLC4A5	351	16	20094	10.734	1	0.434929	0.417865
GOTERM_BP_DIRECT	GO:0007156~homophilic cell adhesion via plasma membrane adhesion molecules	8	1.7094	0.0313577	IGSF11, PRTG, CDH20, CNTN6, CDH22, NRCAM, CELSR2, CELSR3	351	172	20094	2.66269	1	0.438625	0.421417
GOTERM_BP_DIRECT	GO:0009888~tissue development	4	0.854701	0.0322015	NR5A1, NTNG2, SALL4, DLL3	351	40	20094	5.72479	1	0.446273	0.428765
GOTERM_BP_DIRECT	GO:0007519~skeletal muscle tissue development	5	1.06838	0.0322935	MEG3, RTL1, SHH, VGLL2, PITX2	351	69	20094	4.1484	1	0.446273	0.428765
GOTERM_BP_DIRECT	GO:0007166~cell surface receptor signaling pathway	9	1.92308	0.033558	ADGRG1, ADGRV1, FZD5, ERBB4, ADGRB1, FZD8, CXCL13, CELSR2, CELSR3	351	213	20094	2.41892	1	0.446274	0.428766
GOTERM_BP_DIRECT	GO:0042127~regulation of cell proliferation	9	1.92308	0.033558	SHH, ARX, WNT7A, LHX5, MITF, ASCL1, PITX2, NKX2-3, TCFL5	351	213	20094	2.41892	1	0.446274	0.428766
GOTERM_BP_DIRECT	GO:0001569~branching involved in blood vessel morphogenesis	4	0.854701	0.0343084	SHH, FGF8, NRARP, PITX2	351	41	20094	5.58516	1	0.446274	0.428766
GOTERM_BP_DIRECT	GO:0007492~endoderm development	4	0.854701	0.0343084	EOMES, LHX1, NKX2-1, OTX2	351	41	20094	5.58516	1	0.446274	0.428766
GOTERM_BP_DIRECT	GO:0035283~central nervous system segmentation	2	0.42735	0.0345337	ZIC2, ZIC3	351	2	20094	57.2479	1	0.446274	0.428766
GOTERM_BP_DIRECT	GO:0060163~subpallium neuron fate commitment	2	0.42735	0.0345337	GSX2, ASCL1	351	2	20094	57.2479	1	0.446274	0.428766
GOTERM_BP_DIRECT	GO:0006546~glycine catabolic process	2	0.42735	0.0345337	GLDC, AMT	351	2	20094	57.2479	1	0.446274	0.428766
GOTERM_BP_DIRECT	GO:0032901~positive regulation of neurotrophin production	2	0.42735	0.0345337	SHH, HAP1	351	2	20094	57.2479	1	0.446274	0.428766
GOTERM_BP_DIRECT	GO:0021937~cerebellar Purkinje cell-granule cell precursor cell signaling involved in regulation of granule cell precursor cell proliferation	2	0.42735	0.0345337	LHX1, LHX5	351	2	20094	57.2479	1	0.446274	0.428766
GOTERM_BP_DIRECT	GO:0021985~neurohypophysis development	2	0.42735	0.0345337	OTP, POU3F2	351	2	20094	57.2479	1	0.446274	0.428766
GOTERM_BP_DIRECT	GO:0061621~canonical glycolysis	3	0.641026	0.0346281	ENO1B, ENO3, GAPDH	351	17	20094	10.1026	1	0.446274	0.428766
GOTERM_BP_DIRECT	GO:0048699~generation of neurons	3	0.641026	0.0346281	FGF8, GSX2, ASCL1	351	17	20094	10.1026	1	0.446274	0.428766
GOTERM_BP_DIRECT	GO:0035264~multicellular organism growth	7	1.49573	0.0360838	SMPD3, MEG3, CNTNAP2, TAL2, SLC1A2, DLK1, LLGL2	351	140	20094	2.86239	1	0.462437	0.444294
GOTERM_BP_DIRECT	GO:0001656~metanephros development	4	0.854701	0.036485	SHH, FGF8, LHX1, PAX2	351	42	20094	5.45218	1	0.464981	0.446739
GOTERM_BP_DIRECT	GO:0031175~neuron projection development	8	1.7094	0.0367111	CNTNAP2, ATCAY, UNC5A, STMN3, STMN4, PRDM12, HAP1, POU4F1	351	178	20094	2.57294	1	0.465278	0.447024
GOTERM_BP_DIRECT	GO:0014002~astrocyte development	3	0.641026	0.0385165	POU3F2, MT3, DLL1	351	18	20094	9.54131	1	0.475127	0.456486
GOTERM_BP_DIRECT	GO:0021702~cerebellar Purkinje cell differentiation	3	0.641026	0.0385165	LHX1, ATP2B2, LHX5	351	18	20094	9.54131	1	0.475127	0.456486
GOTERM_BP_DIRECT	GO:0040019~positive regulation of embryonic development	3	0.641026	0.0385165	MEG3, LHX1, OTX2	351	18	20094	9.54131	1	0.475127	0.456486
GOTERM_BP_DIRECT	GO:0003323~type B pancreatic cell development	3	0.641026	0.0385165	NKX6-1, DLL1, NKX2-2	351	18	20094	9.54131	1	0.475127	0.456486
GOTERM_BP_DIRECT	GO:0048468~cell development	4	0.854701	0.0387309	SHH, FOXE3, DCT, NKX2-2	351	43	20094	5.32538	1	0.475127	0.456486
GOTERM_BP_DIRECT	GO:0030534~adult behavior	4	0.854701	0.0387309	CNTNAP2, SLC1A2, NRXN3, PAX5	351	43	20094	5.32538	1	0.475127	0.456486
GOTERM_BP_DIRECT	GO:0031667~response to nutrient levels	5	1.06838	0.0402148	PRL3B1, KRT18, TH, PROX1, PAX2	351	74	20094	3.8681	1	0.490706	0.471454
GOTERM_BP_DIRECT	GO:0048596~embryonic camera-type eye morphogenesis	3	0.641026	0.0425624	FZD5, TH, PAX6	351	19	20094	9.03914	1	0.516604	0.496336
GOTERM_BP_DIRECT	GO:0072089~stem cell proliferation	5	1.06838	0.0436656	TRIM71, SHH, FGF8, NR2E1, NES	351	76	20094	3.76631	1	0.527204	0.50652
GOTERM_BP_DIRECT	GO:0046326~positive regulation of glucose import	4	0.854701	0.0458791	FGF15, ERBB4, SLC1A2, KLF15	351	46	20094	4.97808	1	0.54816	0.526654
GOTERM_BP_DIRECT	GO:0045494~photoreceptor cell maintenance	4	0.854701	0.0458791	CRB2, CRB1, ADGRV1, ABCA4	351	46	20094	4.97808	1	0.54816	0.526654
GOTERM_BP_DIRECT	GO:0050965~detection of temperature stimulus involved in sensory perception of pain	3	0.641026	0.0467589	PAWR, PRDM12, EPHB1	351	20	20094	8.58718	1	0.555777	0.533972
GOTERM_BP_DIRECT	GO:0050769~positive regulation of neurogenesis	4	0.854701	0.0483968	LRP2, HAP1, ASCL1, DLL3	351	47	20094	4.87216	1	0.558301	0.536397
GOTERM_BP_DIRECT	GO:0030539~male genitalia development	3	0.641026	0.0510998	SOX2, SHH, FGF8	351	21	20094	8.17827	1	0.558301	0.536397
GOTERM_BP_DIRECT	GO:0007530~sex determination	3	0.641026	0.0510998	NR5A1, SOX3, NR0B1	351	21	20094	8.17827	1	0.558301	0.536397
GOTERM_BP_DIRECT	GO:0042462~eye photoreceptor cell development	3	0.641026	0.0510998	CRB1, TH, PAX6	351	21	20094	8.17827	1	0.558301	0.536397
GOTERM_BP_DIRECT	GO:0022010~central nervous system myelination	3	0.641026	0.0510998	CNTNAP2, NKX6-2, HES5	351	21	20094	8.17827	1	0.558301	0.536397
GOTERM_BP_DIRECT	GO:0060996~dendritic spine development	3	0.641026	0.0510998	CNTNAP2, CAMK2A, EPHB1	351	21	20094	8.17827	1	0.558301	0.536397
GOTERM_BP_DIRECT	GO:0002930~trabecular meshwork development	2	0.42735	0.051352	FOXE3, CYP1B1	351	3	20094	38.1652	1	0.558301	0.536397
GOTERM_BP_DIRECT	GO:0070858~negative regulation of bile acid biosynthetic process	2	0.42735	0.051352	FGF15, PROX1	351	3	20094	38.1652	1	0.558301	0.536397
GOTERM_BP_DIRECT	GO:0014719~skeletal muscle satellite cell activation	2	0.42735	0.051352	WNT7A, EPHB1	351	3	20094	38.1652	1	0.558301	0.536397
GOTERM_BP_DIRECT	GO:0060066~oviduct development	2	0.42735	0.051352	LHX1, WNT7A	351	3	20094	38.1652	1	0.558301	0.536397
GOTERM_BP_DIRECT	GO:0001840~neural plate development	2	0.42735	0.051352	ZIC2, ZIC3	351	3	20094	38.1652	1	0.558301	0.536397
GOTERM_BP_DIRECT	GO:0048852~diencephalon morphogenesis	2	0.42735	0.051352	SOX2, OTX2	351	3	20094	38.1652	1	0.558301	0.536397
GOTERM_BP_DIRECT	GO:0021778~oligodendrocyte cell fate specification	2	0.42735	0.051352	PAX6, OLIG2	351	3	20094	38.1652	1	0.558301	0.536397
GOTERM_BP_DIRECT	GO:0002072~optic cup morphogenesis involved in camera-type eye development	2	0.42735	0.051352	ALDH1A1, PAX2	351	3	20094	38.1652	1	0.558301	0.536397
GOTERM_BP_DIRECT	GO:0097477~lateral motor column neuron migration	2	0.42735	0.051352	DAB1, LHX1	351	3	20094	38.1652	1	0.558301	0.536397
GOTERM_BP_DIRECT	GO:0021543~pallium development	2	0.42735	0.051352	FGF8, PAX6	351	3	20094	38.1652	1	0.558301	0.536397
GOTERM_BP_DIRECT	GO:0019464~glycine decarboxylation via glycine cleavage system	2	0.42735	0.051352	GLDC, AMT	351	3	20094	38.1652	1	0.558301	0.536397
GOTERM_BP_DIRECT	GO:0021986~habenula development	2	0.42735	0.051352	PAX6, POU4F1	351	3	20094	38.1652	1	0.558301	0.536397
GOTERM_BP_DIRECT	GO:0042391~regulation of membrane potential	6	1.28205	0.0523973	RIMS2, KCNH2, RIMS3, CHRNA6, GRIK3, GRIK2	351	116	20094	2.9611	1	0.564316	0.542176
GOTERM_BP_DIRECT	GO:0007613~memory	6	1.28205	0.0523973	KCNK10, TH, ITGA3, SORCS3, RIN1, SLC6A1	351	116	20094	2.9611	1	0.564316	0.542176
GOTERM_BP_DIRECT	GO:0008306~associative learning	4	0.854701	0.0536305	CNTNAP2, NPTX2, RIN1, SLC6A1	351	49	20094	4.67329	1	0.569576	0.54723
GOTERM_BP_DIRECT	GO:0045787~positive regulation of cell cycle	4	0.854701	0.0536305	FOXG1, NR2E1, PROX1, ASCL1	351	49	20094	4.67329	1	0.569576	0.54723
GOTERM_BP_DIRECT	GO:0001654~eye development	4	0.854701	0.0536305	SOX2, FOXE3, SIX6, CHRDL1	351	49	20094	4.67329	1	0.569576	0.54723
GOTERM_BP_DIRECT	GO:0050910~detection of mechanical stimulus involved in sensory perception of sound	3	0.641026	0.0555786	SOX2, ADGRV1, ATP2B2	351	22	20094	7.80653	1	0.587546	0.564495
GOTERM_BP_DIRECT	GO:0043525~positive regulation of neuron apoptotic process	5	1.06838	0.0590757	PAWR, GRIK2, ASCL1, POU4F1, BBC3	351	84	20094	3.40761	1	0.619317	0.595019
GOTERM_BP_DIRECT	GO:0001658~branching involved in ureteric bud morphogenesis	4	0.854701	0.059124	SHH, FGF8, LHX1, PAX2	351	51	20094	4.49003	1	0.619317	0.595019
GOTERM_BP_DIRECT	GO:0030902~hindbrain development	3	0.641026	0.0649263	SHH, PAX6, TBR1	351	24	20094	7.15598	1	0.665438	0.639331
GOTERM_BP_DIRECT	GO:0002021~response to dietary excess	3	0.641026	0.0649263	CNTNAP2, PCSK1N, PNPLA3	351	24	20094	7.15598	1	0.665438	0.639331
GOTERM_BP_DIRECT	GO:0060441~epithelial tube branching involved in lung morphogenesis	3	0.641026	0.0649263	SOX2, SHH, NKX2-1	351	24	20094	7.15598	1	0.665438	0.639331
GOTERM_BP_DIRECT	GO:0033326~cerebrospinal fluid secretion	2	0.42735	0.0678782	CELSR2, SLC4A5	351	4	20094	28.6239	1	0.665438	0.639331
GOTERM_BP_DIRECT	GO:1902725~negative regulation of satellite cell differentiation	2	0.42735	0.0678782	MSTN, EPHB1	351	4	20094	28.6239	1	0.665438	0.639331
GOTERM_BP_DIRECT	GO:0021692~cerebellar Purkinje cell layer morphogenesis	2	0.42735	0.0678782	CNTNAP2, ATP2B2	351	4	20094	28.6239	1	0.665438	0.639331
GOTERM_BP_DIRECT	GO:0035502~metanephric part of ureteric bud development	2	0.42735	0.0678782	LHX1, FOXJ1	351	4	20094	28.6239	1	0.665438	0.639331
GOTERM_BP_DIRECT	GO:0032889~regulation of vacuole fusion, non-autophagic	2	0.42735	0.0678782	ENO3, ENO4	351	4	20094	28.6239	1	0.665438	0.639331
GOTERM_BP_DIRECT	GO:0098727~maintenance of cell number	2	0.42735	0.0678782	ZIC3, ZIC1	351	4	20094	28.6239	1	0.665438	0.639331
GOTERM_BP_DIRECT	GO:0072049~comma-shaped body morphogenesis	2	0.42735	0.0678782	LHX1, HES5	351	4	20094	28.6239	1	0.665438	0.639331
GOTERM_BP_DIRECT	GO:0021759~globus pallidus development	2	0.42735	0.0678782	ARX, NKX2-1	351	4	20094	28.6239	1	0.665438	0.639331
GOTERM_BP_DIRECT	GO:0051939~gamma-aminobutyric acid import	2	0.42735	0.0678782	SLC6A13, SLC6A1	351	4	20094	28.6239	1	0.665438	0.639331
GOTERM_BP_DIRECT	GO:1902723~negative regulation of skeletal muscle satellite cell proliferation	2	0.42735	0.0678782	MSTN, EPHB1	351	4	20094	28.6239	1	0.665438	0.639331
GOTERM_BP_DIRECT	GO:0007386~compartment pattern specification	2	0.42735	0.0678782	DLL1, DLL3	351	4	20094	28.6239	1	0.665438	0.639331
GOTERM_BP_DIRECT	GO:0042481~regulation of odontogenesis	2	0.42735	0.0678782	SHH, SP6	351	4	20094	28.6239	1	0.665438	0.639331
GOTERM_BP_DIRECT	GO:0006520~cellular amino acid metabolic process	3	0.641026	0.0697833	PM20D1, GLDC, GGT1	351	25	20094	6.86974	1	0.681204	0.654478
GOTERM_BP_DIRECT	GO:0021915~neural tube development	4	0.854701	0.0708641	TRIM71, CECR2, SALL4, HES5	351	55	20094	4.16348	1	0.688823	0.661799
GOTERM_BP_DIRECT	GO:0001890~placenta development	4	0.854701	0.073951	RTL1, GJB3, LHX4, LLGL2	351	56	20094	4.08913	1	0.714533	0.6865
GOTERM_BP_DIRECT	GO:0050770~regulation of axonogenesis	3	0.641026	0.074755	BRSK2, WNT7A, POU3F2	351	26	20094	6.60552	1	0.714533	0.6865
GOTERM_BP_DIRECT	GO:0007498~mesoderm development	3	0.641026	0.074755	ZIC3, LHX2, POU4F1	351	26	20094	6.60552	1	0.714533	0.6865
GOTERM_BP_DIRECT	GO:0014032~neural crest cell development	3	0.641026	0.074755	CYP26A1, CYP26C1, KBTBD8	351	26	20094	6.60552	1	0.714533	0.6865
GOTERM_BP_DIRECT	GO:0008285~negative regulation of cell proliferation	13	2.77778	0.0756239	MEG3, FZD5, ZBTB16, PAX6, PROX1, DLL1, MYO16, ADGRG1, PTPRZ1, ERBB4, PKP2, CYP1B1, VSX2	351	431	20094	1.72673	1	0.719839	0.691598
GOTERM_BP_DIRECT	GO:0010629~negative regulation of gene expression	12	2.5641	0.0763983	MIR124-2HG, SHH, TRIM6, FGF15, STC2, PAWR, WNT8B, MIR124A-1HG, POU3F2, POU4F1, CRYAB, MYT1	351	387	20094	1.77513	1	0.724206	0.695793
GOTERM_BP_DIRECT	GO:0070371~ERK1 and ERK2 cascade	4	0.854701	0.0803005	CNTNAP2, ENO1B, FGF18, MT3	351	58	20094	3.94813	1	0.750144	0.720714
GOTERM_BP_DIRECT	GO:0008543~fibroblast growth factor receptor signaling pathway	4	0.854701	0.0835612	TRIM71, FGF15, FGF8, FGF18	351	59	20094	3.88121	1	0.750144	0.720714
GOTERM_BP_DIRECT	GO:0046427~positive regulation of JAK-STAT cascade	4	0.854701	0.0835612	PRL3B1, ERBB4, CYP1B1, HES5	351	59	20094	3.88121	1	0.750144	0.720714
GOTERM_BP_DIRECT	GO:0009449~gamma-aminobutyric acid biosynthetic process	2	0.42735	0.0841172	ALDH1A1, GAD2	351	5	20094	22.8991	1	0.750144	0.720714
GOTERM_BP_DIRECT	GO:0021871~forebrain regionalization	2	0.42735	0.0841172	SHH, LHX1	351	5	20094	22.8991	1	0.750144	0.720714
GOTERM_BP_DIRECT	GO:0061205~paramesonephric duct development	2	0.42735	0.0841172	LHX1, PAX2	351	5	20094	22.8991	1	0.750144	0.720714
GOTERM_BP_DIRECT	GO:0034653~retinoic acid catabolic process	2	0.42735	0.0841172	CYP26A1, CYP26C1	351	5	20094	22.8991	1	0.750144	0.720714
GOTERM_BP_DIRECT	GO:0016199~axon midline choice point recognition	2	0.42735	0.0841172	ROBO3, FOXG1	351	5	20094	22.8991	1	0.750144	0.720714
GOTERM_BP_DIRECT	GO:0045608~negative regulation of auditory receptor cell differentiation	2	0.42735	0.0841172	DLL1, HES5	351	5	20094	22.8991	1	0.750144	0.720714
GOTERM_BP_DIRECT	GO:0048496~maintenance of animal organ identity	2	0.42735	0.0841172	ADGRV1, PKP2	351	5	20094	22.8991	1	0.750144	0.720714
GOTERM_BP_DIRECT	GO:0070445~regulation of oligodendrocyte progenitor proliferation	2	0.42735	0.0841172	EMX1, PTPRZ1	351	5	20094	22.8991	1	0.750144	0.720714
GOTERM_BP_DIRECT	GO:1904457~positive regulation of neuronal action potential	2	0.42735	0.0841172	CNTNAP2, PAWR	351	5	20094	22.8991	1	0.750144	0.720714
GOTERM_BP_DIRECT	GO:0021631~optic nerve morphogenesis	2	0.42735	0.0841172	EPHB1, PAX2	351	5	20094	22.8991	1	0.750144	0.720714
GOTERM_BP_DIRECT	GO:0071073~positive regulation of phospholipid biosynthetic process	2	0.42735	0.0841172	FABP3, ERBB4	351	5	20094	22.8991	1	0.750144	0.720714
GOTERM_BP_DIRECT	GO:1904447~folic acid import into cell	2	0.42735	0.0841172	LRP2, FOLR1	351	5	20094	22.8991	1	0.750144	0.720714
GOTERM_BP_DIRECT	GO:0008283~cell proliferation	11	2.35043	0.0844749	CNTNAP2, SHH, FGF8, ZBTB16, FGF18, PAX6, NR2E1, LRP2, PROX1, NKX6-1, VSX2	351	348	20094	1.80956	1	0.750144	0.720714
GOTERM_BP_DIRECT	GO:0060122~inner ear receptor stereocilium organization	3	0.641026	0.0850207	CECR2, ADGRV1, HES5	351	28	20094	6.1337	1	0.750144	0.720714
GOTERM_BP_DIRECT	GO:0006306~DNA methylation	3	0.641026	0.0850207	EOMES, MEG3, PAX6	351	28	20094	6.1337	1	0.750144	0.720714
GOTERM_BP_DIRECT	GO:0001822~kidney development	7	1.49573	0.0861806	CYP26A1, SHH, FGF8, LHX1, LRP2, PROX1, PAX2	351	175	20094	2.28991	1	0.757465	0.727747
GOTERM_BP_DIRECT	GO:0007416~synapse assembly	4	0.854701	0.0868778	ERBB4, NRXN3, WNT7A, CBLN1	351	60	20094	3.81652	1	0.757786	0.728056
GOTERM_BP_DIRECT	GO:0043588~skin development	4	0.854701	0.0868778	SHH, ITGA3, GJB3, SOX21	351	60	20094	3.81652	1	0.757786	0.728056
GOTERM_BP_DIRECT	GO:2000378~negative regulation of reactive oxygen species metabolic process	3	0.641026	0.0903043	MT3, CRYAB, PAX2	351	29	20094	5.92219	1	0.78469	0.753904
GOTERM_BP_DIRECT	GO:0051402~neuron apoptotic process	5	1.06838	0.0920396	FGF8, GRIK2, GAPDH, POU4F1, NES	351	98	20094	2.92081	1	0.79675	0.765491
GOTERM_BP_DIRECT	GO:0031047~gene silencing by RNA	4	0.854701	0.0936748	TRIM71, TDRKH, LIN28B, LIN28A	351	62	20094	3.69341	1	0.807857	0.776163
GOTERM_BP_DIRECT	GO:0031641~regulation of myelination	3	0.641026	0.0956817	NKX6-2, PTPRZ1, HES5	351	30	20094	5.72479	1	0.819007	0.786875
GOTERM_BP_DIRECT	GO:0007043~cell-cell junction assembly	3	0.641026	0.0956817	CDH20, CDH22, PKP2	351	30	20094	5.72479	1	0.819007	0.786875

## Sheet: GO-E11 5vsgroupE10 5_deg_up
Category	Term	Count	%	PValue	Genes	List Total	Pop Hits	Pop Total	Fold Enrichment	Bonferroni	Benjamini	FDR
GOTERM_BP_DIRECT	GO:0007155~cell adhesion	71	11.6776	7.83902e-27	COL16A1, COL12A1, PCDH11X, TNC, ALCAM, ADGRE5, BOC, SVEP1, PGM5, TMEM8B, POSTN, PCDHGA6, EGFL6, EPHA8, APLP1, GP1BA, EMP2, COL6A2, CDHR1, CDH10, COL6A1, ITGA8, COL8A2, CDH12, COL6A3, COL8A1, PKP1, COL6A6, PLCB1, DSC3, ASTN1, NLGN3, LAMA2, PCDH10, NRXN1, LAMA3, THY1, THBS2, PCDHB22, PCDHB21, PCDH18, COL19A1, PCDHB20, FBLN5, FLRT2, NCAM1, IGFBP7, VCAM1, PCDH9, AMBN, PCDHB15, PCDHB14, MFAP4, SDK1, C…	515	602	20094	4.60173	2.40344e-23	2.40344e-23	2.34857e-23
GOTERM_BP_DIRECT	GO:0030198~extracellular matrix organization	40	6.57895	7.93271e-25	COL17A1, COL16A1, HPSE2, ELN, NDNF, OLFML2A, FBLN5, COL19A1, ADAMTSL1, ADAMTS5, ADAMTS2, ADAMTSL3, ADAMTS17, PDGFRA, SCARA3, POSTN, TGFB2, EGFL6, COL24A1, WNT3A, COL25A1, MMP2, AMBN, APLP1, COLQ, ADAMTS20, COL1A1, SMOC2, COL3A1, COL1A2, COL5A1, COL5A2, ITGA8, COL8A2, COL8A1, COL6A6, COL9A2, TGFBI, MATN4, MATN2	515	184	20094	8.48206	2.43217e-21	1.21608e-21	1.18832e-21
GOTERM_BP_DIRECT	GO:0007156~homophilic cell adhesion via plasma membrane adhesion molecules	29	4.76974	5.30068e-15	ROBO2, PCDH10, PCDH11X, PCDHB22, PCDHB21, PCDH18, PCDHB20, PCDHGA8, PCDHGA6, PCDH9, PCDHGA2, PCDHB15, PCDHB14, SDK1, PCDHB19, PCDHB18, PCDHB17, CDH10, CDHR1, CDH12, PCDHB6, PCDHB5, PCDHB4, FAT4, PCDHB3, PCDHB9, PCDHB8, DSC3, PCDHB7	515	172	20094	6.57853	1.63389e-11	5.41729e-12	5.29361e-12
GOTERM_BP_DIRECT	GO:0007411~axon guidance	24	3.94737	5.67402e-10	ROBO2, SEMA5A, LGI1, NRP2, TGFB2, LAMA2, WNT3A, EPHA8, LAMA3, WNT5A, SEMA4F, UNC5C, UNC5D, GFRA3, RUNX3, GDF7, EFNA3, EDNRA, ALCAM, FLRT2, BOC, CNTN4, EPHA3, MATN2	515	188	20094	4.98095	1.73965e-06	4.34913e-07	4.24984e-07
GOTERM_BP_DIRECT	GO:0010628~positive regulation of gene expression	40	6.57895	5.06372e-08	PTGER4, PID1, NRXN1, LEF1, MPL, TNC, ALOX12B, NTS, CLU, FGF2, CYP26B1, WNT11, C1QTNF1, LMNA, HEY2, BLNK, OSR2, TGFB2, GSN, BCL11A, WNT3A, TESC, OSR1, CAV1, WNT5A, NFATC2, RAB27A, NFATC1, INHBA, NGF, KLF4, DKK1, SOX10, RUNX2, GDF7, BMP2, ALDH1A2, PKP1, RBMS3, PF4	515	583	20094	2.67701	0.000155242	2.61637e-05	2.55663e-05
GOTERM_BP_DIRECT	GO:0007275~multicellular organism development	60	9.86842	5.12009e-08	SEMA5A, ROBO2, RYR2, NRP2, SERPINE2, MYT1L, HIF3A, FZD10, FGF2, CLGN, TMEM100, HEY2, RSPO2, PDGFRA, EGFL6, EPHA8, FST, WNT5A, PAX3, UNC5C, UNC5D, DKK1, DKK2, ZAR1, PAX1, DKK4, GREM2, CDH10, PAX9, ITGA8, CDH12, EPHA3, SATB2, MST1R, NKD1, COL19A1, EGFR, FSTL5, WNT11, FLRT2, FRZB, WIF1, MSX1, NTNG1, WNT10B, GADD45B, WNT3A, EYA4, SEMA4F, BICC1, ARHGAP24, BMP3, BMP2, KIF26B, MAB21L2, MGP, SLCO4C1, SNA…	515	1095	20094	2.13794	0.00015697	2.61637e-05	2.55663e-05
GOTERM_BP_DIRECT	GO:0002062~chondrocyte differentiation	13	2.13816	1.15311e-07	OSR2, WNT10B, OSR1, LTBP3, PTH1R, RUNX3, RUNX2, PTHLH, COL3A1, BMP2, NFIB, TRPS1, TGFBI	515	67	20094	7.57055	0.000353482	5.05063e-05	4.93532e-05
GOTERM_BP_DIRECT	GO:0001649~osteoblast differentiation	15	2.46711	3.25992e-07	GDF10, WNT10B, WNT3A, LEF1, FGF2, RUNX2, GLIS1, COL1A1, BMP3, BMP2, WNT11, LOX, PENK, RSPO2, SP7	515	102	20094	5.73786	0.000998992	0.000114759	0.000112139
GOTERM_BP_DIRECT	GO:0090090~negative regulation of canonical Wnt signaling pathway	17	2.79605	3.36866e-07	CAV1, WNT5A, PRICKLE1, DKK1, SOX10, NKD1, DKK2, BICC1, NKD2, DKK4, GREM1, BMP2, WNT11, FRZB, SNAI2, NOTUM, RBMS3	515	134	20094	4.94998	0.0010323	0.000114759	0.000112139
GOTERM_BP_DIRECT	GO:0007165~signal transduction	67	11.0197	4.67226e-07	PTPRR, RASL11B, DIRAS2, PTH1R, FZD10, ADRA1B, OLFML2A, RERG, MC4R, EDNRA, HTR6, IL18RAP, GRM7, ADGRE5, GRAP2, ADORA1, LEPR, TCP11L2, ANXA1, IL1R1, NFAM1, WNT5A, MAGI2, NPY1R, UNC5C, UNC5D, AVPR1A, ADRA2A, SSTR5, ADAMTS20, GREM1, MRAS, ADGRB2, SPARCL1, RHOV, AGTR2, PLCB1, PTGER4, ENPEP, CHRNA5, PDE1A, NRXN1, NOD2, EGFR, IL1RL2, PROKR2, WNT11, OLFML3, GNG4, ADGRG6, S1PR3, WNT10B, GABRA1, GABRP, GPR…	515	1368	20094	1.91094	0.00143149	0.000143251	0.000139981
GOTERM_BP_DIRECT	GO:0042060~wound healing	15	2.46711	7.46476e-07	PDGFRA, TGFB2, POSTN, GSN, CAV1, WNT5A, TNC, FGF2, EGFR, AQP1, COL1A1, TREML1, COL3A1, LOX, HPSE	515	109	20094	5.36938	0.00228608	0.000208063	0.000203313
GOTERM_BP_DIRECT	GO:0030282~bone mineralization	11	1.80921	2.24205e-06	BMP2, COL1A2, WNT11, LOX, RSPO2, LTBP3, PTN, PTH1R, DNM3OS, PHEX, PTHLH	515	59	20094	7.27444	0.00685057	0.000568662	0.000555679
GOTERM_BP_DIRECT	GO:0001501~skeletal system development	15	2.46711	2.41116e-06	TGFB2, FST, WFIKKN2, LTBP3, PTH1R, DNM3OS, RUNX2, PTHLH, PAX1, COL1A1, COL3A1, COL1A2, TRPS1, COL5A2, FBN1	515	120	20094	4.87718	0.00736536	0.000568662	0.000555679
GOTERM_BP_DIRECT	GO:0009887~animal organ morphogenesis	17	2.79605	2.85256e-06	NTNG1, PDGFRA, WNT10B, LAMA2, WNT3A, LAMA3, WNT5A, FGF2, PAX1, GREM1, TGM1, GREM2, BMP2, WNT11, PRKAR1B, PAX9, NBL1	515	157	20094	4.22482	0.00870784	0.000624711	0.000610449
GOTERM_BP_DIRECT	GO:0060325~face morphogenesis	9	1.48026	7.88836e-06	COL1A1, PDGFRA, TGFB2, MMP2, LEF1, PAX9, ARID5B, MSX1, DKK1	515	41	20094	8.56481	0.0238957	0.00160008	0.00156355
GOTERM_BP_DIRECT	GO:0030199~collagen fibril organization	10	1.64474	8.35006e-06	GREM1, COL1A1, TGFB2, ADAMTS2, COL3A1, COL1A2, ANXA2, LOX, COL5A1, COL5A2	515	54	20094	7.22546	0.0252765	0.00160008	0.00156355
GOTERM_BP_DIRECT	GO:0001503~ossification	14	2.30263	9.45839e-06	GDF10, IFITM1, LRRC17, PTN, PTH1R, RUNX3, RUNX2, GFRA4, COL1A1, IGSF10, BMP3, BMP2, COL5A2, MGP	515	117	20094	4.66876	0.0285831	0.00170585	0.0016669
GOTERM_BP_DIRECT	GO:0016055~Wnt signaling pathway	20	3.28947	1.21122e-05	WNT10B, WNT3A, LEF1, WNT5A, FZD10, APCDD1, DKK1, NKD1, DKK2, NKD2, DKK4, BMP2, WNT11, WIF1, DAAM2, FRZB, RSPO2, RSPO3, NOTUM, LGR6	515	237	20094	3.29261	0.0364551	0.00206311	0.002016
GOTERM_BP_DIRECT	GO:0051965~positive regulation of synapse assembly	11	1.80921	1.81955e-05	NLGN3, LINGO2, FLRT2, ADGRB2, LRRN3, ADGRE5, NRXN1, SLITRK3, SLITRK6, SYNDIG1, THBS2	515	74	20094	5.7999	0.0542603	0.00293618	0.00286914
GOTERM_BP_DIRECT	GO:0060070~canonical Wnt signaling pathway	13	2.13816	2.0759e-05	WNT10B, WNT3A, LEF1, WNT5A, FZD10, KLF4, DKK1, FGF2, EDNRA, WNT11, FRZB, RSPO2, RSPO3	515	108	20094	4.69655	0.0616644	0.00318235	0.00310969
GOTERM_BP_DIRECT	GO:0030509~BMP signaling pathway	13	2.13816	2.50025e-05	TGFB2, TMPRSS6, WNT3A, FST, LEF1, WNT5A, SMAD9, RUNX2, GDF7, TMEM100, BMP2, BMPER, MSX1	515	110	20094	4.61116	0.073794	0.00365036	0.00356702
GOTERM_BP_DIRECT	GO:0007507~heart development	22	3.61842	2.99535e-05	NRP2, TGFB2, VCAM1, MMP2, OSR1, PAX3, NFATC1, CACNA1C, PTN, PCSK5, BICC1, PDLIM3, EDNRA, COL3A1, BMP2, PDLIM2, LOX, ALDH1A2, HEY2, MSX1, PAM, FBN1	515	298	20094	2.88048	0.0877478	0.00417443	0.00407912
GOTERM_BP_DIRECT	GO:0045778~positive regulation of ossification	7	1.15132	3.1848e-05	PTGER4, WNT10B, TGFB2, BMP2, WNT5A, PTN, RUNX2	515	25	20094	10.9249	0.0930314	0.00424547	0.00414854
GOTERM_BP_DIRECT	GO:0001525~angiogenesis	21	3.45395	4.67435e-05	NRP2, ENPEP, ANXA2, COL24A1, CAV1, NRXN1, MMP2, NDNF, HIF3A, THY1, FGF2, ARHGAP24, TMEM100, GREM1, EDNRA, LEPR, COL8A2, COL8A1, RSPO3, CSPG4, TGFBI	515	284	20094	2.8851	0.133522	0.00597148	0.00583515
GOTERM_BP_DIRECT	GO:0071300~cellular response to retinoic acid	10	1.64474	5.63622e-05	COL1A1, CYP26B1, BRINP1, ALDH1A2, TESC, OSR1, TNC, KLF4, EPHA3, AQP1	515	68	20094	5.73786	0.158704	0.00664641	0.00649466
GOTERM_BP_DIRECT	GO:0042475~odontogenesis of dentin-containing tooth	10	1.64474	5.63622e-05	PDGFRA, BMP2, BCL11B, AMBN, FST, NFIC, LEF1, TNC, MSX1, RUNX2	515	68	20094	5.73786	0.158704	0.00664641	0.00649466
GOTERM_BP_DIRECT	GO:0030178~negative regulation of Wnt signaling pathway	9	1.48026	7.34537e-05	DKK4, WIF1, FRZB, NOTUM, APCDD1, DKK1, NKD1, DKK2, NKD2	515	55	20094	6.38468	0.201657	0.00834107	0.00815064
GOTERM_BP_DIRECT	GO:0010977~negative regulation of neuron projection development	11	1.80921	0.000100626	MYLIP, LGALS1, EFEMP1, WNT3A, BCL11A, STMN2, SPOCK1, CSPG4, DKK1, EPHA3, RUNX1T1	515	90	20094	4.7688	0.265479	0.0110186	0.010767
GOTERM_BP_DIRECT	GO:0090263~positive regulation of canonical Wnt signaling pathway	12	1.97368	0.000120007	SEMA5A, COL1A1, WNT10B, ZEB2, WNT3A, DAAM2, CAV1, RSPO2, RSPO3, FGF2, EGFR, DKK2	515	110	20094	4.25645	0.307857	0.0126876	0.0123979
GOTERM_BP_DIRECT	GO:0007268~chemical synaptic transmission	16	2.63158	0.000147616	NLGN3, GRIA1, GABRP, GRIA2, GABRA1, CHRNA5, NRXN1, HTR1B, CACNA1C, DOC2B, CACNA1G, HTR6, DLG2, GRM7, PENK, APBA1	515	194	20094	3.21794	0.364043	0.0148936	0.0145535
GOTERM_BP_DIRECT	GO:0001568~blood vessel development	10	1.64474	0.000150587	COL1A1, TGFB2, COL3A1, COL1A2, LOX, BMPER, COL5A1, ALDH1A2, HEY2, AHR	515	77	20094	5.0672	0.369811	0.0148936	0.0145535
GOTERM_BP_DIRECT	GO:0030335~positive regulation of cell migration	19	3.125	0.000166487	SEMA5A, PDGFRA, LRRC15, TGFB2, CEMIP, CAV1, MMP2, SYNPO2, LEF1, SEMA4F, EGFR, ADRA2A, AQP1, COL1A1, BMP2, WNT11, SNAI2, HPSE, LGR6	515	264	20094	2.80808	0.399799	0.0159515	0.0155873
GOTERM_BP_DIRECT	GO:0006811~ion transport	32	5.26316	0.000177712	GRIA1, GRIA2, RYR2, CHRNA5, KCNK9, SLC40A1, CACNA1C, KCNA6, SLC8A1, KCNV1, KCNMB2, PIEZO2, SLC17A6, SCN3A, KCNJ2, CACNG4, GABRP, GABRA1, KCNJ6, KCND3, KCNB1, CACNA2D3, ATP2B4, SLC5A7, TRPV6, KCNS2, KCNS3, SLCO4C1, SLCO2A1, SFXN3, CACHD1, FXYD7	515	599	20094	2.08441	0.420109	0.0165111	0.0161341
GOTERM_BP_DIRECT	GO:0030324~lung development	13	2.13816	0.000198123	PDGFRA, MME, WNT5A, PTN, FGF2, EGFR, PHEX, ADAMTS2, COL3A1, LOX, NFIB, ALDH1A2, MGP	515	136	20094	3.72961	0.455291	0.017866	0.0174581
GOTERM_BP_DIRECT	GO:0060021~palate development	10	1.64474	0.000222537	OSR2, PDGFRA, WNT11, SATB2, OSR1, WFIKKN2, SNAI2, ARID5B, INHBA, MSX1	515	81	20094	4.81697	0.494585	0.0194943	0.0190492
GOTERM_BP_DIRECT	GO:0048251~elastic fiber assembly	5	0.822368	0.000251776	MFAP4, COL3A1, LOX, LTBP3, FBLN5	515	13	20094	15.0067	0.537932	0.0214429	0.0209534
GOTERM_BP_DIRECT	GO:0008284~positive regulation of cell proliferation	33	5.42763	0.000259052	PTGER4, HPSE2, LEF1, MPL, TNC, PTH1R, NOD2, PTN, CLU, FGF2, EGFR, PTHLH, EDNRA, EFEMP1, IL11RA1, OSR2, WNT10B, PDGFRA, TGFB2, WNT3A, WNT5A, PAX3, EMP2, AVPR1A, NGF, RUNX2, GREM1, CLCF1, ALDH1A2, MAB21L2, CD248, HPSE, AGTR2	515	640	20094	2.01184	0.548128	0.0214663	0.0209762
GOTERM_BP_DIRECT	GO:0042476~odontogenesis	7	1.15132	0.000275955	OSR2, OSR1, PAX9, INHBA, MSX1, PAM, PHEX	515	36	20094	7.58673	0.570956	0.0222652	0.0217569
GOTERM_BP_DIRECT	GO:0098609~cell-cell adhesion	16	2.63158	0.00028407	VCAM1, LAMA3, THY1, EGFR, DLG2, LGALS1, CDH10, BOC, CDH12, ITGA8, PKP1, FAT4, ICOS, CD200, DSC3, ASTN1	515	206	20094	3.03048	0.581501	0.0223323	0.0218224
GOTERM_BP_DIRECT	GO:0072201~negative regulation of mesenchymal cell proliferation	4	0.657895	0.000314184	WNT11, WNT5A, LMNA, PTN	515	6	20094	26.0117	0.618422	0.0235295	0.0229923
GOTERM_BP_DIRECT	GO:0008217~regulation of blood pressure	10	1.64474	0.000320967	EDNRA, ENPEP, COL1A2, LVRN, NPY1R, CACNA1C, AHR, AVPR1A, ADRA1B, SLC8A1	515	85	20094	4.59029	0.626278	0.0235295	0.0229923
GOTERM_BP_DIRECT	GO:0035115~embryonic forelimb morphogenesis	7	1.15132	0.000322322	OSR2, ALDH1A2, OSR1, RSPO2, CACNA1C, MSX1, RUNX2	515	37	20094	7.38168	0.627828	0.0235295	0.0229923
GOTERM_BP_DIRECT	GO:0016477~cell migration	20	3.28947	0.000350375	NTNG1, PDGFRA, TGFB2, ENPEP, MMP2, LAMA3, WNT5A, NFATC2, PAX3, EMP2, MST1R, TSPAN11, AQP1, COL5A1, SNAI2, CD248, SVEP1, RHOV, EPHA3, ASTN1	515	305	20094	2.55852	0.65851	0.0249825	0.0244122
GOTERM_BP_DIRECT	GO:0034765~regulation of ion transmembrane transport	13	2.13816	0.000358908	KCNJ6, KCNB1, KCND3, CACNA2D3, CACNA1C, KCNA6, CACNA1G, KCNV1, KCNS2, KCNS3, SCN3A, KCNJ2, CACNG4	515	145	20094	3.49812	0.667332	0.0250094	0.0244384
GOTERM_BP_DIRECT	GO:0043410~positive regulation of MAPK cascade	15	2.46711	0.00039752	GADD45B, EPHA8, TRP73, ALOX12B, NOD2, ADRA1B, FGF2, ADRA2A, BMP2, C1QTNF2, C1QTNF1, LEPR, ADORA1, CSPG4, TRIM12A	515	190	20094	3.08033	0.704486	0.0265017	0.0258966
GOTERM_BP_DIRECT	GO:0045893~positive regulation of transcription, DNA-templated	35	5.75658	0.000397612	EHF, LEF1, CHD3, AHR, FGF2, EGFR, GLIS1, WNT11, NCOA1, OSR2, ZFHX3, WNT3A, IRX6, TESC, WNT5A, TRP73, PAX3, NFATC2, SMAD9, NFATC1, INHBA, KLF4, RUNX3, SOX10, RUNX2, GDF7, GREM1, COL1A1, BMP2, NFIA, NFIB, TRIM16, AGTR2, PLCB1, CREB5	515	712	20094	1.91799	0.704569	0.0265017	0.0258966
GOTERM_BP_DIRECT	GO:0060349~bone morphogenesis	7	1.15132	0.000433224	OSR2, CYP26B1, SP5, MSX1, LTBP3, PAX1, PAPPA2	515	39	20094	7.00314	0.73514	0.028261	0.0276157
GOTERM_BP_DIRECT	GO:0001822~kidney development	14	2.30263	0.000587181	TGFB2, MME, HPGD, WNT5A, TRP73, ARID5B, PCSK5, BICC1, CYP26B1, WNT11, ALDH1A2, ITGA8, FAT4, FBN1	515	175	20094	3.1214	0.834838	0.0375062	0.0366499
GOTERM_BP_DIRECT	GO:0030514~negative regulation of BMP signaling pathway	8	1.31579	0.000601554	GREM1, GREM2, BMPER, TMPRSS6, CAV1, WNT5A, DKK1, NBL1	515	57	20094	5.47614	0.841962	0.0376401	0.0367807
GOTERM_BP_DIRECT	GO:0035987~endodermal cell differentiation	6	0.986842	0.000767329	MMP2, COL12A1, COL6A1, LAMA3, COL8A1, INHBA	515	29	20094	8.07258	0.904967	0.0470526	0.0459783
GOTERM_BP_DIRECT	GO:0008285~negative regulation of cell proliferation	24	3.94737	0.00078766	CDKN2B, IFITM1, TGFB2, BCL11B, SERPINE2, CAV1, TESC, MAGI2, SLFN3, TRP73, INHBA, PTH1R, KLF4, FGF2, RERG, BMP2, NFIB, FRZB, ALDH1A2, GJB6, LMNA, ADORA1, MSX1, CD200	515	431	20094	2.17267	0.910715	0.0473523	0.0462712
GOTERM_BP_DIRECT	GO:0001837~epithelial to mesenchymal transition	7	1.15132	0.00084153	TGFB2, BMP2, WNT11, LEF1, SNAI2, NFATC1, MSX1	515	44	20094	6.20733	0.924318	0.0496179	0.0484851
GOTERM_BP_DIRECT	GO:0007169~transmembrane receptor protein tyrosine kinase signaling pathway	11	1.80921	0.00090854	PDGFRA, EPHA8, BLNK, CSPG4, MST1R, NGF, GFRA3, EGFR, EPHA3, FRK, GFRA4	515	118	20094	3.63722	0.938385	0.0515849	0.0504071
GOTERM_BP_DIRECT	GO:0032355~response to estradiol	11	1.80921	0.00090854	GHR, NCOA1, COL1A1, POSTN, GJB2, ANXA1, HPGD, ALDH1A2, PENK, PTN, PAM	515	118	20094	3.63722	0.938385	0.0515849	0.0504071
GOTERM_BP_DIRECT	GO:0055085~transmembrane transport	24	3.94737	0.000947688	RYR2, ABCA8B, KCNB1, ABCA6, KCND3, SLC2A13, ABCA9, TAP1, CACNA1C, KCNA6, SLC8A1, AQP1, KCNV1, SLC5A7, GJB2, TRPV6, KCNS2, GJB6, KCNS3, SLCO4C1, SFXN3, SLC17A6, SCN3A, GPR155	515	437	20094	2.14284	0.94536	0.0527998	0.0515943
GOTERM_BP_DIRECT	GO:0030154~cell differentiation	44	7.23684	0.000973599	SEMA5A, ROBO2, NRP2, EHF, SERPINE2, MYT1L, FGF2, NKD1, EGFR, COL19A1, GLIS1, CLGN, SYNE1, TMEM100, FSTL5, FRZB, NTNG1, OSR2, EGFL6, GADD45B, TESC, OSR1, CAV1, FST, TMEM176B, WNT5A, EYA4, SMAD9, SEMA4F, KLF4, SOX10, RUNX2, ARHGAP24, BMP3, BMP2, ELF5, SLCO4C1, MGP, ITGA8, TLL1, CSPG4, ZFP750, FRK, BRDT	515	1022	20094	1.67981	0.949537	0.0527998	0.0515943
GOTERM_BP_DIRECT	GO:0007399~nervous system development	24	3.94737	0.0009816	ROBO2, CHODL, SEMA5A, NTNG1, MYLIP, NRP2, SERPINE2, MYT1L, EPHA8, MAGI2, PAX3, SEMA4F, NDNF, MST1R, LDB2, GFRA3, PCDH18, GFRA4, BOC, ITGA8, CNTN3, CNTN4, MDGA2, NBL1	515	438	20094	2.13794	0.950761	0.0527998	0.0515943
GOTERM_BP_DIRECT	GO:0051966~regulation of synaptic transmission, glutamatergic	6	0.986842	0.00105267	NLGN3, GRIA2, SERPINE2, GRM7, FRRS1L, DKK1	515	31	20094	7.55177	0.960411	0.0550272	0.0537709
GOTERM_BP_DIRECT	GO:0016525~negative regulation of angiogenesis	10	1.64474	0.00105891	TGFB2, EFNA3, ADGRB2, PLK2, ATP2B4, PTN, THBS2, KLF4, FBLN5, PF4	515	100	20094	3.90175	0.961161	0.0550272	0.0537709
GOTERM_BP_DIRECT	GO:0007267~cell-cell signaling	9	1.48026	0.00108753	GREM1, WNT10B, GJB2, WNT11, WNT3A, GJB6, WNT5A, THY1, ADRA1B	515	81	20094	4.33528	0.964427	0.0554777	0.0542111
GOTERM_BP_DIRECT	GO:0030326~embryonic limb morphogenesis	8	1.31579	0.00110376	GREM1, TGFB2, CYP26B1, ALDH1A2, WNT5A, LEF1, MSX1, DKK1	515	63	20094	4.9546	0.966157	0.0554777	0.0542111
GOTERM_BP_DIRECT	GO:0030334~regulation of cell migration	11	1.80921	0.00117386	DOCK10, LAMA2, TNN, LAMA3, LMNA, TNC, UNC5C, LDB2, THY1, FGF2, EPHA3	515	122	20094	3.51797	0.972708	0.0573546	0.0560451
GOTERM_BP_DIRECT	GO:0048812~neuron projection morphogenesis	9	1.48026	0.00117867	NRXN1, WNT5A, EPB41L3, SLITRK6, NGF, SGK1, CLU, NBL1, EGFR	515	82	20094	4.28241	0.973108	0.0573546	0.0560451
GOTERM_BP_DIRECT	GO:0002076~osteoblast development	5	0.822368	0.00120824	TNN, SATB2, PTH1R, RUNX2, PTHLH	515	19	20094	10.2678	0.975441	0.0573546	0.0560451
GOTERM_BP_DIRECT	GO:0006366~transcription from RNA polymerase II promoter	16	2.63158	0.00121593	WNT10B, EHF, BCL11B, WNT3A, LEF1, SLC40A1, NFATC2, NFATC1, INHBA, AHR, HIF3A, KLF4, SOX10, FGF2, BMP2, MSX1	515	237	20094	2.63409	0.976015	0.0573546	0.0560451
GOTERM_BP_DIRECT	GO:1900020~positive regulation of protein kinase C activity	4	0.657895	0.00124586	CEMIP, NRXN1, WNT5A, EGFR	515	9	20094	17.3411	0.97812	0.0578758	0.0565544
GOTERM_BP_DIRECT	GO:0001974~blood vessel remodeling	7	1.15132	0.0013423	TGFB2, EDNRA, ELN, BGN, RSPO3, AHR, ADRA1B	515	48	20094	5.69005	0.983727	0.0614251	0.0600227
GOTERM_BP_DIRECT	GO:0000902~cell morphogenesis	10	1.64474	0.0013984	GREM1, TGFB2, CDH10, CDH12, GP1BA, MSX1, AHR, SHROOM1, CLU, EGFR	515	104	20094	3.75168	0.986302	0.0630516	0.0616121
GOTERM_BP_DIRECT	GO:0007189~adenylate cyclase-activating G-protein coupled receptor signaling pathway	11	1.80921	0.00149929	MC4R, PTGER4, ADGRB2, ADGRE5, ADGRG6, S1PR3, ADCY2, PTH1R, PTHLH, ADCY5, PF4	515	126	20094	3.40629	0.989951	0.0666205	0.0650995
GOTERM_BP_DIRECT	GO:0007193~adenylate cyclase-inhibiting G-protein coupled receptor signaling pathway	7	1.15132	0.00166509	EDNRA, GRM7, ADORA1, HTR1B, S1PR3, SSTR5, ADCY5	515	50	20094	5.46245	0.99396	0.0729308	0.0712657
GOTERM_BP_DIRECT	GO:0008283~cell proliferation	20	3.28947	0.00168947	OSR2, WNT10B, ENPEP, HPSE2, WNT3A, CAV1, WNT5A, PAX3, PTH1R, FGF2, RUNX2, EGFR, PAX1, IL18RAP, NFIB, ALDH1A2, MAB21L2, CSPG4, TGFBI, IL11RA1	515	348	20094	2.24238	0.994396	0.0729565	0.0712909
GOTERM_BP_DIRECT	GO:0045944~positive regulation of transcription from RNA polymerase II promoter	49	8.05921	0.00192024	EHF, PID1, MYT1L, SLC40A1, HIF3A, LDB2, AHR, FGF2, HEY2, NCOA1, OSR2, ANXA2, OSR1, WNT5A, TRP73, PAX3, SOX10, RUNX2, PAX1, GREM1, ZEB2, ELF5, PAX9, CREB5, NFIX, TMPRSS6, SATB2, LEF1, NOD2, GLIS1, FBLN5, EGFR, MSX1, WNT10B, ZFHX3, BCL11B, WNT3A, NFATC2, NFATC1, INHBA, KLF4, BMP3, BMP2, NFIA, NFIB, NFIC, SP7, ZFP750, PF4	515	1216	20094	1.57225	0.997242	0.0808907	0.0790439
GOTERM_BP_DIRECT	GO:0038098~sequestering of BMP from receptor via BMP binding	3	0.493421	0.00192597	GREM1, GREM2, NBL1	515	3	20094	39.0175	0.99729	0.0808907	0.0790439
GOTERM_BP_DIRECT	GO:0031175~neuron projection development	13	2.13816	0.00215924	LGI1, EPHA8, NRXN1, STMN2, TNC, NGF, RUNX3, GPRIN3, GPRIN2, EDNRA, NCAM1, CNTN4, MATN2	515	178	20094	2.84959	0.998676	0.0894625	0.0874199
GOTERM_BP_DIRECT	GO:0048839~inner ear development	8	1.31579	0.00222765	TGFB2, GJB2, BMP2, BMPER, GJB6, EYA4, IGFBP7, CXCL14	515	71	20094	4.39634	0.998927	0.0910664	0.0889873
GOTERM_BP_DIRECT	GO:0016485~protein processing	9	1.48026	0.00230297	ENPEP, ADAMTS2, MME, CPXM2, TLL1, PCSK5, ASPRV1, PHEX, PTHLH	515	91	20094	3.85887	0.999149	0.0919665	0.0898668
GOTERM_BP_DIRECT	GO:2001028~positive regulation of endothelial cell chemotaxis	4	0.657895	0.0023555	SEMA5A, SMOC2, SNAI2, FGF2	515	11	20094	14.1882	0.999276	0.0919665	0.0898668
GOTERM_BP_DIRECT	GO:0007158~neuron cell-cell adhesion	4	0.657895	0.0023555	NLGN3, NRXN1, ASTN2, ASTN1	515	11	20094	14.1882	0.999276	0.0919665	0.0898668
GOTERM_BP_DIRECT	GO:0006813~potassium ion transport	11	1.80921	0.00236965	KCNV1, KCNJ6, KCNK9, KCNB1, KCNS2, KCND3, KCNS3, KCNMB2, KCNA6, KCNJ2, AQP1	515	134	20094	3.20293	0.999307	0.0919665	0.0898668
GOTERM_BP_DIRECT	GO:0032331~negative regulation of chondrocyte differentiation	5	0.822368	0.00299391	GREM1, EFEMP1, SNAI2, LTBP3, PTHLH	515	24	20094	8.12864	0.999898	0.110108	0.107594
GOTERM_BP_DIRECT	GO:0042246~tissue regeneration	5	0.822368	0.00299391	IGSF10, GSN, APOD, PTN, LGR6	515	24	20094	8.12864	0.999898	0.110108	0.107594
GOTERM_BP_DIRECT	GO:0070588~calcium ion transmembrane transport	9	1.48026	0.00301537	RYR2, EDNRA, TRPV6, CACNA2D3, ATP2B4, CACNA1C, CACNG4, SLC8A1, CACNA1G	515	95	20094	3.69639	0.999905	0.110108	0.107594
GOTERM_BP_DIRECT	GO:0007179~transforming growth factor beta receptor signaling pathway	9	1.48026	0.00301537	TGFB2, COL3A1, BMP2, COL1A2, HPGD, WFIKKN2, ITGA8, SMAD9, LTBP3	515	95	20094	3.69639	0.999905	0.110108	0.107594
GOTERM_BP_DIRECT	GO:0030168~platelet activation	6	0.986842	0.00301666	TREML1, ENTPD1, SERPINE2, WNT3A, ADRA2A, PF4	515	39	20094	6.00269	0.999905	0.110108	0.107594
GOTERM_BP_DIRECT	GO:0045444~fat cell differentiation	9	1.48026	0.00321772	GDF10, WNT10B, WNT3A, ARID5B, KLF4, PLCB1, GLIS1, CREB5, RUNX1T1	515	96	20094	3.65789	0.999949	0.116065	0.113415
GOTERM_BP_DIRECT	GO:0072089~stem cell proliferation	8	1.31579	0.00328405	OSR2, WNT11, NFIB, WNT5A, PAX3, NFATC1, FGF2, RUNX2	515	76	20094	4.1071	0.999958	0.11708	0.114407
GOTERM_BP_DIRECT	GO:0030177~positive regulation of Wnt signaling pathway	6	0.986842	0.00337636	ZEB2, BMP2, LEF1, RSPO2, RSPO3, LGR6	515	40	20094	5.85262	0.999969	0.118987	0.116271
GOTERM_BP_DIRECT	GO:0090082~positive regulation of heart induction by negative regulation of canonical Wnt signaling pathway	3	0.493421	0.00378664	WNT11, WNT5A, DKK1	515	4	20094	29.2631	0.999991	0.130896	0.127908
GOTERM_BP_DIRECT	GO:0019233~sensory perception of pain	8	1.31579	0.00379966	EDNRA, DLG2, MME, PENK, NPY1R, NGF, SCN3A, AQP1	515	78	20094	4.00179	0.999991	0.130896	0.127908
GOTERM_BP_DIRECT	GO:0001942~hair follicle development	7	1.15132	0.00389359	TGFB2, TRPS1, INHBA, LDB2, APCDD1, DKK1, EGFR	515	59	20094	4.62919	0.999994	0.13098	0.12799
GOTERM_BP_DIRECT	GO:0060394~negative regulation of pathway-restricted SMAD protein phosphorylation	4	0.657895	0.00393025	GREM1, PMEPA1, LDLRAD4, DKK1	515	13	20094	12.0054	0.999994	0.13098	0.12799
GOTERM_BP_DIRECT	GO:0071305~cellular response to vitamin D	4	0.657895	0.00393025	PENK, TNC, PTN, PHEX	515	13	20094	12.0054	0.999994	0.13098	0.12799
GOTERM_BP_DIRECT	GO:0042474~middle ear morphogenesis	5	0.822368	0.00404583	OSR2, EDNRA, OSR1, EYA4, MSX1	515	26	20094	7.50336	0.999996	0.131963	0.12895
GOTERM_BP_DIRECT	GO:2000647~negative regulation of stem cell proliferation	5	0.822368	0.00404583	WNT11, NFIB, SNAI2, NFATC1, FGF2	515	26	20094	7.50336	0.999996	0.131963	0.12895
GOTERM_BP_DIRECT	GO:0043588~skin development	7	1.15132	0.00423479	COL1A1, ADAMTS2, COL3A1, BCL11B, COL5A1, COL5A2, ASPRV1	515	60	20094	4.55204	0.999998	0.136672	0.133552
GOTERM_BP_DIRECT	GO:0045669~positive regulation of osteoblast differentiation	8	1.31579	0.00437451	GDF10, PTGER4, WNT10B, IFITM1, BMP2, LMNA, FGF2, RUNX2	515	80	20094	3.90175	0.999999	0.138271	0.135114
GOTERM_BP_DIRECT	GO:0060395~SMAD protein signal transduction	8	1.31579	0.00437451	GDF10, BMP3, TGFB2, BMP2, MAGI2, SMAD9, INHBA, GDF7	515	80	20094	3.90175	0.999999	0.138271	0.135114
GOTERM_BP_DIRECT	GO:2001222~regulation of neuron migration	5	0.822368	0.00465483	NTNG1, IGSF10, FLRT2, UNC5C, UNC5D	515	27	20094	7.22546	0.999999	0.14563	0.142305
GOTERM_BP_DIRECT	GO:0099560~synaptic membrane adhesion	5	0.822368	0.00532255	NTNG1, NRXN1, SLITRK3, SPARCL1, EPHA3	515	28	20094	6.96741	1	0.164838	0.161074
GOTERM_BP_DIRECT	GO:0048856~anatomical structure development	7	1.15132	0.00539103	ZEB2, WIF1, EYA4, PAX9, SPARCL1, PAX3, PAX1	515	63	20094	4.33528	1	0.165289	0.161515
GOTERM_BP_DIRECT	GO:0009612~response to mechanical stimulus	7	1.15132	0.00582329	COL1A1, POSTN, COL3A1, CAV1, MMP2, TNC, PIEZO2	515	64	20094	4.26754	1	0.176774	0.172738
GOTERM_BP_DIRECT	GO:0003184~pulmonary valve morphogenesis	4	0.657895	0.00601956	ROBO2, TGFB2, HEY2, NFATC1	515	15	20094	10.4047	1	0.180941	0.17681
GOTERM_BP_DIRECT	GO:0030501~positive regulation of bone mineralization	6	0.986842	0.00620711	OSR2, WNT10B, BMP2, OSR1, PTN, SLC8A1	515	46	20094	5.08924	1	0.183041	0.178862
GOTERM_BP_DIRECT	GO:0071260~cellular response to mechanical stimulus	9	1.48026	0.00620884	PTGER4, COL1A1, EDNRA, WNT11, CAV1, PIEZO2, EGFR, KCNJ2, AQP1	515	107	20094	3.28184	1	0.183041	0.178862
GOTERM_BP_DIRECT	GO:0001764~neuron migration	11	1.80921	0.0063636	COL3A1, NRP2, TNN, SATB2, SPOCK1, NDNF, MDGA2, GFRA3, ASTN2, ASTN1, MATN2	515	154	20094	2.78696	1	0.185817	0.181575
GOTERM_BP_DIRECT	GO:0000122~negative regulation of transcription from RNA polymerase II promoter	39	6.41447	0.00678881	NFIX, TMPRSS6, MYT1L, SATB2, LEF1, CHD3, AHR, LDB2, FBLN5, GLIS1, TBX22, TRPS1, HEY2, MSX1, LMCD1, OSR2, WNT10B, ZFHX3, BCL11A, OSR1, CAV1, FST, PAX3, ARID5B, NFATC2, NFATC1, KLF4, DKK1, RUNX3, SOX10, TBX15, ZEB2, BMP2, NFIB, NFIC, SP5, SNAI2, ZFP750, FRK	515	975	20094	1.5607	1	0.196363	0.19188
GOTERM_BP_DIRECT	GO:0001666~response to hypoxia	13	2.13816	0.006964	RYR2, TGFB2, POSTN, VCAM1, CAV1, MMP2, HIF3A, SLC8A1, EDNRA, BMP2, PENK, ADORA1, PAM	515	206	20094	2.46227	1	0.199548	0.194992
GOTERM_BP_DIRECT	GO:0060402~calcium ion transport into cytosol	4	0.657895	0.00726955	RYR2, CACNA1C, SLC8A1, CACNA1G	515	16	20094	9.75437	1	0.206374	0.201663
GOTERM_BP_DIRECT	GO:0055074~calcium ion homeostasis	6	0.986842	0.00743817	SGCD, TRPV6, CAV1, FAM20A, PTHLH, SLC8A1	515	48	20094	4.87718	1	0.209224	0.204447
GOTERM_BP_DIRECT	GO:0032870~cellular response to hormone stimulus	5	0.822368	0.00770157	ROBO2, GHR, NCOA1, IGFBP7, ADRA2A	515	31	20094	6.29314	1	0.214664	0.209763
GOTERM_BP_DIRECT	GO:0071372~cellular response to follicle-stimulating hormone stimulus	4	0.657895	0.00866175	EDNRA, EPHA8, INHBA, EPHA3	515	17	20094	9.18058	1	0.239252	0.233789
GOTERM_BP_DIRECT	GO:0010862~positive regulation of pathway-restricted SMAD protein phosphorylation	6	0.986842	0.00882977	GDF10, BMP3, TGFB2, BMP2, INHBA, GDF7	515	50	20094	4.6821	1	0.241715	0.236196
GOTERM_BP_DIRECT	GO:0071560~cellular response to transforming growth factor beta stimulus	7	1.15132	0.00896379	COL1A1, POSTN, CAV1, WNT5A, PENK, PDE3A, FBN1	515	70	20094	3.90175	1	0.243212	0.237659
GOTERM_BP_DIRECT	GO:0014012~peripheral nervous system axon regeneration	3	0.493421	0.00914936	MMP2, TNC, APOD	515	6	20094	19.5087	1	0.24393	0.238361
GOTERM_BP_DIRECT	GO:0048263~determination of dorsal identity	3	0.493421	0.00914936	GREM1, GREM2, NBL1	515	6	20094	19.5087	1	0.24393	0.238361
GOTERM_BP_DIRECT	GO:0051216~cartilage development	8	1.31579	0.00930216	BMP3, COL3A1, BMP2, SATB2, MGP, WNT5A, SMAD9, MSX1	515	92	20094	3.39282	1	0.245866	0.240252
GOTERM_BP_DIRECT	GO:0042493~response to drug	17	2.79605	0.00964355	RPH3AL, TGFB2, ANXA1, MMP2, TRP73, NFATC2, INHBA, PTN, SLC6A2, SLC8A1, COL1A1, LGALS1, LOX, PDE3A, APOD, NCAM1, PAM	515	324	20094	2.04721	1	0.252711	0.246941
GOTERM_BP_DIRECT	GO:2000738~positive regulation of stem cell differentiation	4	0.657895	0.0101994	TACSTD2, PTN, SP7, FGF2	515	18	20094	8.67055	1	0.263767	0.257745
GOTERM_BP_DIRECT	GO:0003007~heart morphogenesis	7	1.15132	0.0102375	TGFB2, FLRT2, COL5A1, ALDH1A2, MSX1, FAT4, SLC8A1	515	72	20094	3.79337	1	0.263767	0.257745
GOTERM_BP_DIRECT	GO:0001755~neural crest cell migration	6	0.986842	0.0103914	SEMA5A, ZEB2, NRP2, PAX3, SEMA4F, SOX10	515	52	20094	4.50202	1	0.265501	0.259439
GOTERM_BP_DIRECT	GO:0019933~cAMP-mediated signaling	5	0.822368	0.01069	ADGRG6, PDE3A, ADCY2, AHR, PDE7B	515	34	20094	5.73786	1	0.270871	0.264687
GOTERM_BP_DIRECT	GO:0045597~positive regulation of cell differentiation	7	1.15132	0.0109203	GHR, BMP2, LEF1, SMAD9, PTN, CLU, FGF2	515	73	20094	3.7414	1	0.27444	0.268175
GOTERM_BP_DIRECT	GO:2000648~positive regulation of stem cell proliferation	6	0.986842	0.0112389	OSR2, WNT5A, PAX3, NGF, FGF2, RUNX2	515	53	20094	4.41707	1	0.28015	0.273754
GOTERM_BP_DIRECT	GO:0007160~cell-matrix adhesion	8	1.31579	0.0116094	COL3A1, VCAM1, TNN, ITGA8, EMP2, LYPD3, HPSE, TMEM8B	515	96	20094	3.25146	1	0.287051	0.280497
GOTERM_BP_DIRECT	GO:0035904~aorta development	5	0.822368	0.0118307	ROBO2, EDNRA, COL3A1, LOX, PRICKLE1	515	35	20094	5.57393	1	0.289208	0.282605
GOTERM_BP_DIRECT	GO:0048546~digestive tract morphogenesis	4	0.657895	0.0118853	WNT5A, TRP73, SOX10, EGFR	515	19	20094	8.21421	1	0.289208	0.282605
GOTERM_BP_DIRECT	GO:0006954~inflammatory response	19	3.125	0.0120854	GM10591, PTGER4, ANXA1, IL1R1, TRIL, TRP73, NOD2, PPBP, IL1RL2, CYP26B1, BMP2, IL18RAP, PRKCQ, S1PR3, CSPG4, HPSE, AGTR2, CHST2, PF4	515	390	20094	1.90085	1	0.290606	0.283971
GOTERM_BP_DIRECT	GO:0045907~positive regulation of vasoconstriction	6	0.986842	0.0121323	CAV1, TBXAS1, NPY1R, AVPR1A, ADRA1B, EGFR	515	54	20094	4.33528	1	0.290606	0.283971
GOTERM_BP_DIRECT	GO:0044691~tooth eruption	3	0.493421	0.0125934	COL1A1, ADAMTS5, FAM20A	515	7	20094	16.7218	1	0.294742	0.288013
GOTERM_BP_DIRECT	GO:0010544~negative regulation of platelet activation	3	0.493421	0.0125934	PDGFRA, C1QTNF1, SERPINE2	515	7	20094	16.7218	1	0.294742	0.288013
GOTERM_BP_DIRECT	GO:0001957~intramembranous ossification	3	0.493421	0.0125934	COL1A1, CTSK, MMP2	515	7	20094	16.7218	1	0.294742	0.288013
GOTERM_BP_DIRECT	GO:1905606~regulation of presynapse assembly	5	0.822368	0.0130466	WNT3A, NRXN1, SLITRK3, SLITRK6, MDGA2	515	36	20094	5.41909	1	0.301359	0.294478
GOTERM_BP_DIRECT	GO:0009968~negative regulation of signal transduction	6	0.986842	0.0130726	TREML1, CAV1, DDIT4L, PMEPA1, RGS7BP, LDLRAD4	515	55	20094	4.25645	1	0.301359	0.294478
GOTERM_BP_DIRECT	GO:0006816~calcium ion transport	10	1.64474	0.0140266	RYR2, TRPV6, CAV1, CACNA2D3, CACHD1, ATP2B4, NFATC1, CACNA1C, CACNG4, SLC8A1	515	148	20094	2.63632	1	0.31934	0.312049
GOTERM_BP_DIRECT	GO:1903078~positive regulation of protein localization to plasma membrane	6	0.986842	0.014061	WNT3A, NRXN1, ATP2B4, EGFR, EPHA3, NKD2	515	56	20094	4.18044	1	0.31934	0.312049
GOTERM_BP_DIRECT	GO:0032570~response to progesterone	5	0.822368	0.0143394	NCOA1, TGFB2, GJB2, CAV1, PTN	515	37	20094	5.27263	1	0.323269	0.315888
GOTERM_BP_DIRECT	GO:0008219~cell death	5	0.822368	0.0157104	TGFB2, BRINP1, EMP1, EMP2, EMP3	515	38	20094	5.13388	1	0.349045	0.341076
GOTERM_BP_DIRECT	GO:0043113~receptor clustering	5	0.822368	0.0157104	GM49486, DLG2, MAGI2, PTN, THY1	515	38	20094	5.13388	1	0.349045	0.341076
GOTERM_BP_DIRECT	GO:0030155~regulation of cell adhesion	6	0.986842	0.0161856	GSN, LAMA2, EPHA8, TNN, LAMA3, TNC	515	58	20094	4.03629	1	0.353962	0.345881
GOTERM_BP_DIRECT	GO:0001756~somitogenesis	6	0.986842	0.0161856	IFITM1, ZEB2, WNT3A, WNT5A, LEF1, PAX1	515	58	20094	4.03629	1	0.353962	0.345881
GOTERM_BP_DIRECT	GO:0048341~paraxial mesoderm formation	3	0.493421	0.0165089	WNT11, WNT5A, LEF1	515	8	20094	14.6316	1	0.353962	0.345881
GOTERM_BP_DIRECT	GO:0019800~peptide cross-linking via chondroitin 4-sulfate glycosaminoglycan	3	0.493421	0.0165089	SPOCK3, BGN, NDNF	515	8	20094	14.6316	1	0.353962	0.345881
GOTERM_BP_DIRECT	GO:0007204~positive regulation of cytosolic calcium ion concentration	11	1.80921	0.0165209	PTGER4, PDGFRA, EDNRA, C1QTNF1, CACNA1C, PTH1R, AVPR1A, ADRA1B, SLC8A1, ADCY5, CACNA1G	515	178	20094	2.41119	1	0.353962	0.345881
GOTERM_BP_DIRECT	GO:0043010~camera-type eye development	7	1.15132	0.0166245	EFEMP1, ALDH1A2, MAB21L2, SLITRK6, CACNA1C, AHR, FBN1	515	80	20094	3.41403	1	0.353962	0.345881
GOTERM_BP_DIRECT	GO:0010976~positive regulation of neuron projection development	11	1.80921	0.0171141	SERPINE2, BCL11A, TNN, NRXN1, WNT5A, MAGI2, STMN2, NDNF, PTN, NGF, EPHA3	515	179	20094	2.39772	1	0.357933	0.349761
GOTERM_BP_DIRECT	GO:0030901~midbrain development	5	0.822368	0.0171612	WNT3A, WNT5A, SMAD9, MSX1, GDF7	515	39	20094	5.00224	1	0.357933	0.349761
GOTERM_BP_DIRECT	GO:0086091~regulation of heart rate by cardiac conduction	5	0.822368	0.0171612	KCND3, CAV1, CACNA1C, KCNJ2, CACNA1G	515	39	20094	5.00224	1	0.357933	0.349761
GOTERM_BP_DIRECT	GO:0048678~response to axon injury	5	0.822368	0.0186928	LGALS1, APOD, FGF2, MATN4, MATN2	515	40	20094	4.87718	1	0.387244	0.378403
GOTERM_BP_DIRECT	GO:0045165~cell fate commitment	7	1.15132	0.0196014	WNT10B, BMP2, WNT11, WNT3A, WNT5A, HEY2, GDF7	515	83	20094	3.29063	1	0.403342	0.394133
GOTERM_BP_DIRECT	GO:0002027~regulation of heart rate	5	0.822368	0.0203065	RYR2, EDNRA, IRX5, SLC8A1, CACNA1G	515	41	20094	4.75823	1	0.412317	0.402903
GOTERM_BP_DIRECT	GO:0001816~cytokine production	5	0.822368	0.0203065	WNT3A, WNT5A, NFATC2, NFATC1, S1PR3	515	41	20094	4.75823	1	0.412317	0.402903
GOTERM_BP_DIRECT	GO:0031340~positive regulation of vesicle fusion	3	0.493421	0.0208698	ANXA1, ANXA2, DOC2B	515	9	20094	13.0058	1	0.412818	0.403393
GOTERM_BP_DIRECT	GO:0006929~substrate-dependent cell migration	3	0.493421	0.0208698	EPHA8, SNAI2, CSPG4	515	9	20094	13.0058	1	0.412818	0.403393
GOTERM_BP_DIRECT	GO:0042487~regulation of odontogenesis of dentin-containing tooth	3	0.493421	0.0208698	BMP2, APCDD1, RUNX2	515	9	20094	13.0058	1	0.412818	0.403393
GOTERM_BP_DIRECT	GO:0014050~negative regulation of glutamate secretion	3	0.493421	0.0208698	HTR6, GRM7, ADORA1	515	9	20094	13.0058	1	0.412818	0.403393
GOTERM_BP_DIRECT	GO:0030308~negative regulation of cell growth	9	1.48026	0.0211479	GREM1, TGFB2, WNT11, SERPINE2, GNG4, FRZB, INHBA, MSX1, RERG	515	133	20094	2.64028	1	0.415637	0.406148
GOTERM_BP_DIRECT	GO:0060326~cell chemotaxis	7	1.15132	0.021776	SEMA5A, PDGFRA, VCAM1, LOX, LEF1, PRKCQ, CXCL14	515	85	20094	3.2132	1	0.424291	0.414604
GOTERM_BP_DIRECT	GO:0034614~cellular response to reactive oxygen species	5	0.822368	0.0220034	PDGFRA, MMP2, EGFR, PDK2, SLC8A1	515	42	20094	4.64494	1	0.424291	0.414604
GOTERM_BP_DIRECT	GO:0001656~metanephros development	5	0.822368	0.0220034	ROBO2, OSR2, OSR1, ITGA8, FBN1	515	42	20094	4.64494	1	0.424291	0.414604
GOTERM_BP_DIRECT	GO:1903672~positive regulation of sprouting angiogenesis	4	0.657895	0.0225978	BMPER, TNN, KLF4, FGF2	515	24	20094	6.50291	1	0.43303	0.423144
GOTERM_BP_DIRECT	GO:0060348~bone development	7	1.15132	0.022922	PTGER4, BMP2, OGN, BGN, SMAD9, NOTUM, PHEX	515	86	20094	3.17584	1	0.436515	0.426549
GOTERM_BP_DIRECT	GO:0048675~axon extension	5	0.822368	0.0237843	NLGN3, SEMA5A, EDNRA, SEMA4F, NGF	515	43	20094	4.53692	1	0.450139	0.439862
GOTERM_BP_DIRECT	GO:0035567~non-canonical Wnt signaling pathway	4	0.657895	0.025203	WNT11, FRZB, WNT5A, FZD10	515	25	20094	6.2428	1	0.468126	0.457438
GOTERM_BP_DIRECT	GO:0031295~T cell costimulation	4	0.657895	0.025203	LGALS1, CAV1, TNFRSF14, ICOS	515	25	20094	6.2428	1	0.468126	0.457438
GOTERM_BP_DIRECT	GO:0010594~regulation of endothelial cell migration	3	0.493421	0.0256507	BMPER, EMP2, PTN	515	10	20094	11.7052	1	0.468126	0.457438
GOTERM_BP_DIRECT	GO:0061037~negative regulation of cartilage development	3	0.493421	0.0256507	TGFB2, FRZB, CTSK	515	10	20094	11.7052	1	0.468126	0.457438
GOTERM_BP_DIRECT	GO:0060346~bone trabecula formation	3	0.493421	0.0256507	COL1A1, WNT10B, MMP2	515	10	20094	11.7052	1	0.468126	0.457438
GOTERM_BP_DIRECT	GO:0007494~midgut development	3	0.493421	0.0256507	ALDH1A2, WNT5A, EGFR	515	10	20094	11.7052	1	0.468126	0.457438
GOTERM_BP_DIRECT	GO:0007409~axonogenesis	8	1.31579	0.0272346	NTNG1, BCL11B, WNT3A, TNN, WNT5A, APLP1, SLITRK3, SLITRK6	515	114	20094	2.73807	1	0.49409	0.482809
GOTERM_BP_DIRECT	GO:0050673~epithelial cell proliferation	7	1.15132	0.0279095	EHF, WNT5A, COL8A2, COL8A1, FGF2, EGFR, RUNX2	515	90	20094	3.03469	1	0.503356	0.491863
GOTERM_BP_DIRECT	GO:0032526~response to retinoic acid	6	0.986842	0.0283581	NCOA1, GJB2, IGFBP7, TRIM16, KLF4, DKK1	515	67	20094	3.4941	1	0.506236	0.494678
GOTERM_BP_DIRECT	GO:0021766~hippocampus development	7	1.15132	0.0292596	HSD3B6, NCOA1, ZEB2, WNT3A, LEF1, TRP73, ATP2B4	515	91	20094	3.00134	1	0.506236	0.494678
GOTERM_BP_DIRECT	GO:0010811~positive regulation of cell-substrate adhesion	5	0.822368	0.0296389	SMOC2, EGFL6, COL8A1, NDNF, PTN	515	46	20094	4.24103	1	0.506236	0.494678
GOTERM_BP_DIRECT	GO:0060412~ventricular septum morphogenesis	5	0.822368	0.0296389	ROBO2, TGFB2, WNT11, HEY2, NFATC1	515	46	20094	4.24103	1	0.506236	0.494678
GOTERM_BP_DIRECT	GO:0048662~negative regulation of smooth muscle cell proliferation	5	0.822368	0.0296389	BMP2, CAV1, OGN, APOD, KLF4	515	46	20094	4.24103	1	0.506236	0.494678
GOTERM_BP_DIRECT	GO:0071230~cellular response to amino acid stimulus	9	1.48026	0.0297868	COL1A1, PDGFRA, COL3A1, COL1A2, COL16A1, MMP2, COL5A2, COL6A1, EGFR	515	142	20094	2.47294	1	0.506236	0.494678
GOTERM_BP_DIRECT	GO:0050679~positive regulation of epithelial cell proliferation	7	1.15132	0.030652	OSR2, OSR1, WNT5A, NOD2, FGF2, EGFR, RUNX2	515	92	20094	2.96872	1	0.506236	0.494678
GOTERM_BP_DIRECT	GO:0071805~potassium ion transmembrane transport	8	1.31579	0.03079	KCNV1, KCNK9, KCNB1, KCNS2, KCND3, KCNS3, KCNA6, KCNJ2	515	117	20094	2.66786	1	0.506236	0.494678
GOTERM_BP_DIRECT	GO:0071313~cellular response to caffeine	3	0.493421	0.0308275	RYR2, GSTM7, SLC8A1	515	11	20094	10.6411	1	0.506236	0.494678
GOTERM_BP_DIRECT	GO:0010881~regulation of cardiac muscle contraction by regulation of the release of sequestered calcium ion	3	0.493421	0.0308275	RYR2, CACNA1C, SLC8A1	515	11	20094	10.6411	1	0.506236	0.494678
GOTERM_BP_DIRECT	GO:0098911~regulation of ventricular cardiac muscle cell action potential	3	0.493421	0.0308275	RYR2, CAV1, CACNA1C	515	11	20094	10.6411	1	0.506236	0.494678
GOTERM_BP_DIRECT	GO:0090091~positive regulation of extracellular matrix disassembly	3	0.493421	0.0308275	SEMA5A, TGFB2, HPSE	515	11	20094	10.6411	1	0.506236	0.494678
GOTERM_BP_DIRECT	GO:0032060~bleb assembly	3	0.493421	0.0308275	EMP1, EMP2, EMP3	515	11	20094	10.6411	1	0.506236	0.494678
GOTERM_BP_DIRECT	GO:0070257~positive regulation of mucus secretion	3	0.493421	0.0308275	PTGER4, ALOX12B, EGFR	515	11	20094	10.6411	1	0.506236	0.494678
GOTERM_BP_DIRECT	GO:0048843~negative regulation of axon extension involved in axon guidance	4	0.657895	0.0308761	SEMA5A, WNT3A, WNT5A, SEMA4F	515	27	20094	5.78037	1	0.506236	0.494678
GOTERM_BP_DIRECT	GO:0070509~calcium ion import	4	0.657895	0.0308761	TRPV6, CACNA1C, SLC8A1, CACNA1G	515	27	20094	5.78037	1	0.506236	0.494678
GOTERM_BP_DIRECT	GO:0006883~cellular sodium ion homeostasis	4	0.657895	0.0308761	TESC, AGTR2, SGK1, SLC8A1	515	27	20094	5.78037	1	0.506236	0.494678
GOTERM_BP_DIRECT	GO:0010718~positive regulation of epithelial to mesenchymal transition	5	0.822368	0.0317632	COL1A1, TGFB2, BMP2, GLIPR2, LEF1	515	47	20094	4.1508	1	0.51801	0.506183
GOTERM_BP_DIRECT	GO:0043066~negative regulation of apoptotic process	26	4.27632	0.0320013	LEF1, MPL, SLC40A1, CLU, EGFR, AQP1, RNF157, INSL6, CKMT1, EDNRA, WNT11, ADORA1, MSX1, TGFB2, BCL11B, PLK2, OSR1, WNT5A, DKK1, SOX10, ADAMTS20, GREM1, AGO4, PDE3A, SNAI2, SGK1	515	657	20094	1.54407	1	0.519132	0.50728
GOTERM_BP_DIRECT	GO:0048666~neuron development	6	0.986842	0.0334252	TGFB2, MYT1L, TRP73, NCAM1, NGF, GFRA3	515	70	20094	3.34436	1	0.539377	0.527063
GOTERM_BP_DIRECT	GO:0030900~forebrain development	7	1.15132	0.0350865	PCDH9, NFIB, ALDH1A2, APLP1, TRP73, MSX1, DKK1	515	95	20094	2.87497	1	0.560287	0.547495
GOTERM_BP_DIRECT	GO:0050804~modulation of synaptic transmission	7	1.15132	0.0350865	NLGN3, NTNG1, GRIA1, PRKAR1B, WNT3A, NCAM1, NGF	515	95	20094	2.87497	1	0.560287	0.547495
GOTERM_BP_DIRECT	GO:0003198~epithelial to mesenchymal transition involved in endocardial cushion formation	3	0.493421	0.0363767	TMEM100, SNAI2, MSX1	515	12	20094	9.75437	1	0.574902	0.561776
GOTERM_BP_DIRECT	GO:0048846~axon extension involved in axon guidance	3	0.493421	0.0363767	NRP2, ALCAM, WNT5A	515	12	20094	9.75437	1	0.574902	0.561776
GOTERM_BP_DIRECT	GO:0045780~positive regulation of bone resorption	4	0.657895	0.0371607	MC4R, PTGER4, LTBP3, EGFR	515	29	20094	5.38172	1	0.584281	0.570941
GOTERM_BP_DIRECT	GO:0060173~limb development	5	0.822368	0.0386597	GREM1, RSPO2, RSPO3, PAM, DKK1	515	50	20094	3.90175	1	0.602093	0.588347
GOTERM_BP_DIRECT	GO:0043065~positive regulation of apoptotic process	17	2.79605	0.0386864	NCOA1, WNT10B, TGFB2, ANXA1, GADD45B, HPGD, MMP2, TRP73, UNC5C, PTN, CLU, BMP2, WNT11, LGALS1, FRZB, ALDH1A2, PMAIP1	515	383	20094	1.73185	1	0.602093	0.588347
GOTERM_BP_DIRECT	GO:0070527~platelet aggregation	4	0.657895	0.0405293	PDGFRA, WNT3A, MPL, GP1BA	515	30	20094	5.20233	1	0.621263	0.607078
GOTERM_BP_DIRECT	GO:0009314~response to radiation	4	0.657895	0.0405293	COL3A1, IL1R1, PENK, SNAI2	515	30	20094	5.20233	1	0.621263	0.607078
GOTERM_BP_DIRECT	GO:0008542~visual learning	6	0.986842	0.0410057	NLGN3, CACNA1C, SGK1, ADRA1B, NTS, RAG1	515	74	20094	3.16358	1	0.621263	0.607078
GOTERM_BP_DIRECT	GO:0042472~inner ear morphogenesis	6	0.986842	0.0410057	MYO15, WNT3A, FRZB, WNT5A, SLITRK6, ITGA8	515	74	20094	3.16358	1	0.621263	0.607078
GOTERM_BP_DIRECT	GO:0048706~embryonic skeletal system development	5	0.822368	0.0411338	COL1A1, EDNRA, WNT11, WNT5A, PCSK5	515	51	20094	3.82524	1	0.621263	0.607078
GOTERM_BP_DIRECT	GO:0007157~heterophilic cell-cell adhesion via plasma membrane cell adhesion molecules	5	0.822368	0.0411338	LGALS1, VCAM1, ALCAM, NRXN1, FAT4	515	51	20094	3.82524	1	0.621263	0.607078
GOTERM_BP_DIRECT	GO:0033689~negative regulation of osteoblast proliferation	3	0.493421	0.042276	GREM1, TNN, AHR	515	13	20094	9.00403	1	0.623165	0.608937
GOTERM_BP_DIRECT	GO:0021527~spinal cord association neuron differentiation	3	0.493421	0.042276	WNT3A, PAX3, GDF7	515	13	20094	9.00403	1	0.623165	0.608937
GOTERM_BP_DIRECT	GO:0097435~supramolecular fiber organization	3	0.493421	0.042276	MFAP4, COL3A1, COL5A1	515	13	20094	9.00403	1	0.623165	0.608937
GOTERM_BP_DIRECT	GO:0008347~glial cell migration	3	0.493421	0.042276	TGFB2, CSPG4, MATN2	515	13	20094	9.00403	1	0.623165	0.608937
GOTERM_BP_DIRECT	GO:0032330~regulation of chondrocyte differentiation	3	0.493421	0.042276	TRPS1, PRKG2, PTHLH	515	13	20094	9.00403	1	0.623165	0.608937
GOTERM_BP_DIRECT	GO:0043552~positive regulation of phosphatidylinositol 3-kinase activity	4	0.657895	0.0440465	PDGFRA, EPHA8, NOD2, FGF2	515	31	20094	5.03451	1	0.646156	0.631404
GOTERM_BP_DIRECT	GO:2000300~regulation of synaptic vesicle exocytosis	6	0.986842	0.0451551	CHRNA5, GRM7, HTR1B, APBA1, ADRA2A, PPFIA2	515	76	20094	3.08033	1	0.659265	0.644213
GOTERM_BP_DIRECT	GO:0071407~cellular response to organic cyclic compound	6	0.986842	0.0473204	WNT10B, BMP2, LGALS1, SP5, SMAD9, NOD2	515	77	20094	3.04032	1	0.662992	0.647855
GOTERM_BP_DIRECT	GO:0048146~positive regulation of fibroblast proliferation	6	0.986842	0.0473204	PDGFRA, ANXA2, WNT5A, CD248, EGFR, AQP1	515	77	20094	3.04032	1	0.662992	0.647855
GOTERM_BP_DIRECT	GO:0002092~positive regulation of receptor internalization	4	0.657895	0.0477106	GREM1, GM49486, WNT3A, MAGI2	515	32	20094	4.87718	1	0.662992	0.647855
GOTERM_BP_DIRECT	GO:0007166~cell surface receptor signaling pathway	11	1.80921	0.0480258	ANXA1, ADGRB2, ADGRE5, CLCF1, ADGRG6, NCAM1, FZD10, AGTR2, PTH1R, EGFR, PAPPA2	515	213	20094	2.01499	1	0.662992	0.647855
GOTERM_BP_DIRECT	GO:0048711~positive regulation of astrocyte differentiation	3	0.493421	0.048504	BMP2, SERPINE2, CLCF1	515	14	20094	8.36089	1	0.662992	0.647855
GOTERM_BP_DIRECT	GO:0003197~endocardial cushion development	3	0.493421	0.048504	TMEM100, NFATC1, EPHA3	515	14	20094	8.36089	1	0.662992	0.647855
GOTERM_BP_DIRECT	GO:0003214~cardiac left ventricle morphogenesis	3	0.493421	0.048504	TGFB2, HEY2, AHR	515	14	20094	8.36089	1	0.662992	0.647855
GOTERM_BP_DIRECT	GO:0060317~cardiac epithelial to mesenchymal transition	3	0.493421	0.048504	TGFB2, BMP2, HEY2	515	14	20094	8.36089	1	0.662992	0.647855
GOTERM_BP_DIRECT	GO:0002067~glandular epithelial cell differentiation	3	0.493421	0.048504	NFIB, CAV1, KLF4	515	14	20094	8.36089	1	0.662992	0.647855
GOTERM_BP_DIRECT	GO:2001241~positive regulation of extrinsic apoptotic signaling pathway in absence of ligand	3	0.493421	0.048504	SRPX, TGFB2, INHBA	515	14	20094	8.36089	1	0.662992	0.647855
GOTERM_BP_DIRECT	GO:0010717~regulation of epithelial to mesenchymal transition	3	0.493421	0.048504	GREM1, PHLDB2, EPHA3	515	14	20094	8.36089	1	0.662992	0.647855
GOTERM_BP_DIRECT	GO:0086002~cardiac muscle cell action potential involved in contraction	3	0.493421	0.048504	CACNA1C, KCNJ2, CACNA1G	515	14	20094	8.36089	1	0.662992	0.647855
GOTERM_BP_DIRECT	GO:0033138~positive regulation of peptidyl-serine phosphorylation	7	1.15132	0.0488564	WNT3A, CAV1, NRXN1, WNT5A, ATP2B4, NGF, EGFR	515	103	20094	2.65167	1	0.662992	0.647855
GOTERM_BP_DIRECT	GO:0048705~skeletal system morphogenesis	5	0.822368	0.0490823	COL1A1, PDGFRA, MMP2, ARID5B, RUNX2	515	54	20094	3.61273	1	0.662992	0.647855
GOTERM_BP_DIRECT	GO:0045786~negative regulation of cell cycle	5	0.822368	0.0490823	BMP2, BRINP1, HPGD, INHBA, RUNX3	515	54	20094	3.61273	1	0.662992	0.647855
GOTERM_BP_DIRECT	GO:0045471~response to ethanol	8	1.31579	0.0497523	VCAM1, GSN, HPGD, PENK, TBXAS1, TNC, HTR1B, CDO1	515	130	20094	2.40108	1	0.662992	0.647855
GOTERM_BP_DIRECT	GO:0051897~positive regulation of protein kinase B signaling	8	1.31579	0.0497523	SEMA5A, C1QTNF1, NRXN1, HPSE, MST1R, NTS, FGF2, EGFR	515	130	20094	2.40108	1	0.662992	0.647855
GOTERM_BP_DIRECT	GO:1903225~negative regulation of endodermal cell differentiation	2	0.328947	0.0505065	COL5A1, COL5A2	515	2	20094	39.0175	1	0.662992	0.647855
GOTERM_BP_DIRECT	GO:0060775~planar cell polarity pathway involved in gastrula mediolateral intercalation	2	0.328947	0.0505065	WNT11, WNT5A	515	2	20094	39.0175	1	0.662992	0.647855
GOTERM_BP_DIRECT	GO:0072239~metanephric glomerulus vasculature development	2	0.328947	0.0505065	OSR1, AQP1	515	2	20094	39.0175	1	0.662992	0.647855
GOTERM_BP_DIRECT	GO:1902618~cellular response to fluoride	2	0.328947	0.0505065	COL1A1, PLCB1	515	2	20094	39.0175	1	0.662992	0.647855
GOTERM_BP_DIRECT	GO:0051885~positive regulation of timing of anagen	2	0.328947	0.0505065	WNT10B, WNT5A	515	2	20094	39.0175	1	0.662992	0.647855
GOTERM_BP_DIRECT	GO:1902748~positive regulation of lens fiber cell differentiation	2	0.328947	0.0505065	ZEB2, FGF2	515	2	20094	39.0175	1	0.662992	0.647855
GOTERM_BP_DIRECT	GO:0019221~cytokine-mediated signaling pathway	9	1.48026	0.0506002	GHR, GREM2, IL1R1, IL10RB, CAV1, MPL, LEPR, IL11RA1, PF4	515	158	20094	2.22251	1	0.662992	0.647855
GOTERM_BP_DIRECT	GO:0016339~calcium-dependent cell-cell adhesion via plasma membrane cell adhesion molecules	4	0.657895	0.0515194	CDH10, NRXN1, CDH12, PCDH18	515	33	20094	4.72939	1	0.669315	0.654034
GOTERM_BP_DIRECT	GO:1990138~neuron projection extension	4	0.657895	0.0515194	SEMA5A, POSTN, ALCAM, TNN	515	33	20094	4.72939	1	0.669315	0.654034
GOTERM_BP_DIRECT	GO:0001819~positive regulation of cytokine production	6	0.986842	0.0518328	PTGER4, WNT3A, NFAM1, WNT5A, AGTR2, ADRA2A	515	79	20094	2.96335	1	0.670546	0.655237
GOTERM_BP_DIRECT	GO:0051092~positive regulation of NF-kappaB transcription factor activity	9	1.48026	0.0521493	GREM1, IL18RAP, CAV1, WNT5A, PRKCQ, NOD2, NTS, CLU, TRIM12A	515	159	20094	2.20854	1	0.671806	0.656468
GOTERM_BP_DIRECT	GO:0042311~vasodilation	5	0.822368	0.0548177	ADORA1, AGTR2, VSTM4, EGFR, ADRA2A	515	56	20094	3.4837	1	0.680456	0.66492
GOTERM_BP_DIRECT	GO:0070233~negative regulation of T cell apoptotic process	3	0.493421	0.0550401	BCL11B, PRKCQ, RAG1	515	15	20094	7.8035	1	0.680456	0.66492
GOTERM_BP_DIRECT	GO:0042730~fibrinolysis	3	0.493421	0.0550401	ANXA2, TMPRSS6, GP1BA	515	15	20094	7.8035	1	0.680456	0.66492
GOTERM_BP_DIRECT	GO:0033173~calcineurin-NFAT signaling cascade	3	0.493421	0.0550401	ADGRB2, NFATC2, NFATC1	515	15	20094	7.8035	1	0.680456	0.66492
GOTERM_BP_DIRECT	GO:2001046~positive regulation of integrin-mediated signaling pathway	3	0.493421	0.0550401	LAMA2, EMP2, PCSK5	515	15	20094	7.8035	1	0.680456	0.66492
GOTERM_BP_DIRECT	GO:0060389~pathway-restricted SMAD protein phosphorylation	3	0.493421	0.0550401	TGFB2, BMP2, GDF7	515	15	20094	7.8035	1	0.680456	0.66492
GOTERM_BP_DIRECT	GO:0061029~eyelid development in camera-type eye	3	0.493421	0.0550401	OSR2, INHBA, EGFR	515	15	20094	7.8035	1	0.680456	0.66492
GOTERM_BP_DIRECT	GO:0006518~peptide metabolic process	3	0.493421	0.0550401	MME, CPXM2, PAM	515	15	20094	7.8035	1	0.680456	0.66492
GOTERM_BP_DIRECT	GO:0033690~positive regulation of osteoblast proliferation	3	0.493421	0.0550401	BMP2, HPSE, FBLN5	515	15	20094	7.8035	1	0.680456	0.66492
GOTERM_BP_DIRECT	GO:0035815~positive regulation of renal sodium excretion	3	0.493421	0.0550401	PTGER4, AGTR2, AVPR1A	515	15	20094	7.8035	1	0.680456	0.66492
GOTERM_BP_DIRECT	GO:0043278~response to morphine	4	0.657895	0.0554706	GHR, EDNRA, PENK, ADRA1B	515	34	20094	4.59029	1	0.683024	0.667429
GOTERM_BP_DIRECT	GO:0042593~glucose homeostasis	9	1.48026	0.0569784	RPH3AL, KCNB1, LEPR, CACNA1C, ADRA1B, PDK2, ADRA2A, SSTR5, FBN1	515	162	20094	2.16764	1	0.698784	0.68283
GOTERM_BP_DIRECT	GO:0007568~aging	10	1.64474	0.0576838	GJB2, VCAM1, GSN, MMP2, GJB6, PENK, APOD, NCAM1, PTH1R, FGF2	515	191	20094	2.0428	1	0.700641	0.684644
GOTERM_BP_DIRECT	GO:0003151~outflow tract morphogenesis	5	0.822368	0.0578154	TGFB2, WNT11, ELN, HEY2, NPY1R	515	57	20094	3.42259	1	0.700641	0.684644
GOTERM_BP_DIRECT	GO:0071320~cellular response to cAMP	5	0.822368	0.0578154	WNT10B, PENK, AHR, SLC8A1, AQP1	515	57	20094	3.42259	1	0.700641	0.684644
GOTERM_BP_DIRECT	GO:0008584~male gonad development	8	1.31579	0.0586575	NCOA1, INSL6, TGFB2, AGO4, TESC, WNT5A, ARID5B, INHBA	515	135	20094	2.31215	1	0.705083	0.688986
GOTERM_BP_DIRECT	GO:0006006~glucose metabolic process	6	0.986842	0.0590566	NPY1R, APOD, PGM5, PDK2, PGM2L1, FBN1	515	82	20094	2.85494	1	0.705083	0.688986
GOTERM_BP_DIRECT	GO:0043406~positive regulation of MAP kinase activity	6	0.986842	0.0590566	GHR, NOD2, MST1R, FGF2, EGFR, ADRA2A	515	82	20094	2.85494	1	0.705083	0.688986
GOTERM_BP_DIRECT	GO:0055001~muscle cell development	4	0.657895	0.0595618	LOX, MYOF, WFIKKN2, SLC8A1	515	35	20094	4.45914	1	0.705083	0.688986
GOTERM_BP_DIRECT	GO:0016032~viral process	4	0.657895	0.0595618	A, VCAM1, TNFRSF14, MST1R	515	35	20094	4.45914	1	0.705083	0.688986
GOTERM_BP_DIRECT	GO:0035116~embryonic hindlimb morphogenesis	4	0.657895	0.0595618	OSR2, OSR1, RSPO2, MSX1	515	35	20094	4.45914	1	0.705083	0.688986
GOTERM_BP_DIRECT	GO:0002720~positive regulation of cytokine production involved in immune response	3	0.493421	0.0618645	WNT5A, TNFRSF14, NOD2	515	16	20094	7.31578	1	0.71576	0.699419
GOTERM_BP_DIRECT	GO:0046632~alpha-beta T cell differentiation	3	0.493421	0.0618645	ANXA1, BCL11B, LEF1	515	16	20094	7.31578	1	0.71576	0.699419
GOTERM_BP_DIRECT	GO:0061053~somite development	3	0.493421	0.0618645	WNT11, FRZB, WNT5A	515	16	20094	7.31578	1	0.71576	0.699419
GOTERM_BP_DIRECT	GO:0016322~neuron remodeling	3	0.493421	0.0618645	EDNRA, EPHA8, CSPG4	515	16	20094	7.31578	1	0.71576	0.699419
GOTERM_BP_DIRECT	GO:0045793~positive regulation of cell size	3	0.493421	0.0618645	PRR16, TRP73, AHR	515	16	20094	7.31578	1	0.71576	0.699419
GOTERM_BP_DIRECT	GO:0030857~negative regulation of epithelial cell differentiation	3	0.493421	0.0618645	CAV1, FST, OSR1	515	16	20094	7.31578	1	0.71576	0.699419
GOTERM_BP_DIRECT	GO:0043392~negative regulation of DNA binding	4	0.657895	0.0637905	NFIB, LEF1, WFIKKN2, MSX1	515	36	20094	4.33528	1	0.735269	0.718482
GOTERM_BP_DIRECT	GO:0007266~Rho protein signal transduction	5	0.822368	0.0640682	EPS8, EDNRA, COL1A2, ARHGDIB, CDC42EP2	515	59	20094	3.30657	1	0.735705	0.718908
GOTERM_BP_DIRECT	GO:0007416~synapse assembly	5	0.822368	0.0673221	NLGN3, DNM3, SDK1, NRXN1, SLITRK6	515	60	20094	3.25146	1	0.770185	0.752601
GOTERM_BP_DIRECT	GO:0045666~positive regulation of neuron differentiation	7	1.15132	0.0678357	NCOA1, SH3GL3, BMP2, BRINP1, NGF, NBL1, GDF7	515	112	20094	2.43859	1	0.773176	0.755524
GOTERM_BP_DIRECT	GO:0045956~positive regulation of calcium ion-dependent exocytosis	3	0.493421	0.0689582	KCNB1, DOC2B, CACNA1G	515	17	20094	6.88544	1	0.783058	0.76518
GOTERM_BP_DIRECT	GO:0071310~cellular response to organic substance	4	0.657895	0.072649	WNT10B, EDNRA, LOX, SATB2	515	38	20094	4.1071	1	0.812309	0.793763
GOTERM_BP_DIRECT	GO:0050807~regulation of synapse organization	4	0.657895	0.072649	WNT3A, WNT5A, SPARCL1, DKK1	515	38	20094	4.1071	1	0.812309	0.793763
GOTERM_BP_DIRECT	GO:0051968~positive regulation of synaptic transmission, glutamatergic	4	0.657895	0.072649	NLGN3, NRXN1, EGFR, CACNG4	515	38	20094	4.1071	1	0.812309	0.793763
GOTERM_BP_DIRECT	GO:0003138~primary heart field specification	2	0.328947	0.0747967	WNT11, WNT5A	515	3	20094	26.0117	1	0.812309	0.793763
GOTERM_BP_DIRECT	GO:1905686~positive regulation of plasma membrane repair	2	0.328947	0.0747967	ANXA2, AHNAK	515	3	20094	26.0117	1	0.812309	0.793763
GOTERM_BP_DIRECT	GO:0031104~dendrite regeneration	2	0.328947	0.0747967	PTN, MATN2	515	3	20094	26.0117	1	0.812309	0.793763
GOTERM_BP_DIRECT	GO:2001212~regulation of vasculogenesis	2	0.328947	0.0747967	HEY2, EMP2	515	3	20094	26.0117	1	0.812309	0.793763
GOTERM_BP_DIRECT	GO:2000298~regulation of Rho-dependent protein serine/threonine kinase activity	2	0.328947	0.0747967	SYNPO2, THY1	515	3	20094	26.0117	1	0.812309	0.793763
GOTERM_BP_DIRECT	GO:0060128~corticotropin hormone secreting cell differentiation	2	0.328947	0.0747967	BMP2, FGF2	515	3	20094	26.0117	1	0.812309	0.793763
GOTERM_BP_DIRECT	GO:0036023~embryonic skeletal limb joint morphogenesis	2	0.328947	0.0747967	OSR2, OSR1	515	3	20094	26.0117	1	0.812309	0.793763
GOTERM_BP_DIRECT	GO:1901660~calcium ion export	2	0.328947	0.0747967	ATP2B4, SLC8A1	515	3	20094	26.0117	1	0.812309	0.793763
GOTERM_BP_DIRECT	GO:0006874~cellular calcium ion homeostasis	7	1.15132	0.0749924	RYR2, EDNRA, CAV1, ATP2B4, CACNA1C, PTH1R, SLC8A1	515	115	20094	2.37498	1	0.812309	0.793763
GOTERM_BP_DIRECT	GO:0050680~negative regulation of epithelial cell proliferation	6	0.986842	0.075135	WNT10B, TGFB2, CDKN2B, WNT5A, PTN, RUNX3	515	88	20094	2.66028	1	0.812309	0.793763
GOTERM_BP_DIRECT	GO:0048566~embryonic digestive tract development	3	0.493421	0.076303	TGFB2, ALDH1A2, PCSK5	515	18	20094	6.50291	1	0.812309	0.793763
GOTERM_BP_DIRECT	GO:0071625~vocalization behavior	3	0.493421	0.076303	NLGN3, BRINP1, NRXN1	515	18	20094	6.50291	1	0.812309	0.793763
GOTERM_BP_DIRECT	GO:0071711~basement membrane organization	3	0.493421	0.076303	COL3A1, FLRT2, CAV1	515	18	20094	6.50291	1	0.812309	0.793763
GOTERM_BP_DIRECT	GO:0048066~developmental pigmentation	3	0.493421	0.076303	EDNRA, ZEB2, PAX3	515	18	20094	6.50291	1	0.812309	0.793763
GOTERM_BP_DIRECT	GO:0010812~negative regulation of cell-substrate adhesion	3	0.493421	0.076303	COL1A1, LGALS1, SPOCK1	515	18	20094	6.50291	1	0.812309	0.793763
GOTERM_BP_DIRECT	GO:0071773~cellular response to BMP stimulus	4	0.657895	0.077273	TMEM100, BMP2, KCND3, RUNX2	515	39	20094	4.00179	1	0.819789	0.801072
GOTERM_BP_DIRECT	GO:0008544~epidermis development	5	0.822368	0.077585	CERS3, SVEP1, KLF4, ZFP750, EGFR	515	63	20094	3.09663	1	0.820261	0.801534
GOTERM_BP_DIRECT	GO:0001934~positive regulation of protein phosphorylation	12	1.97368	0.0781724	PTGER4, EDNRA, BMP2, ANXA2, LRRN3, WNT3A, WNT5A, LEPR, FAM20A, NGF, FGF2, EGFR	515	264	20094	1.77352	1	0.823631	0.804827
GOTERM_BP_DIRECT	GO:0007626~locomotory behavior	7	1.15132	0.0799932	MYO15, PENK, NPY1R, APBA1, ADRA1B, ADCY5, ASTN1	515	117	20094	2.33438	1	0.839928	0.820752
GOTERM_BP_DIRECT	GO:0070374~positive regulation of ERK1 and ERK2 cascade	11	1.80921	0.0813274	GM10591, PDGFRA, EDNRA, BMP2, BMPER, GLIPR2, NRXN1, NOD2, NGF, FGF2, EGFR	515	235	20094	1.82635	1	0.846739	0.827407
GOTERM_BP_DIRECT	GO:0034394~protein localization to cell surface	4	0.657895	0.0820227	WNT11, EMP2, ASTN2, FBLN5	515	40	20094	3.90175	1	0.846739	0.827407
GOTERM_BP_DIRECT	GO:0048701~embryonic cranial skeleton morphogenesis	4	0.657895	0.0820227	PDGFRA, TBX15, IRX5, RUNX2	515	40	20094	3.90175	1	0.846739	0.827407
GOTERM_BP_DIRECT	GO:0045595~regulation of cell differentiation	4	0.657895	0.0820227	WNT3A, KLF4, RUNX3, RUNX2	515	40	20094	3.90175	1	0.846739	0.827407
GOTERM_BP_DIRECT	GO:0009888~tissue development	4	0.657895	0.0820227	NTNG1, POSTN, LAMA2, LAMA3	515	40	20094	3.90175	1	0.846739	0.827407
GOTERM_BP_DIRECT	GO:0035994~response to muscle stretch	3	0.493421	0.0838816	RYR2, GSN, SLC8A1	515	19	20094	6.16065	1	0.855408	0.835878
GOTERM_BP_DIRECT	GO:0019229~regulation of vasoconstriction	3	0.493421	0.0838816	CACNA1C, ADRA1B, ADRA2A	515	19	20094	6.16065	1	0.855408	0.835878
GOTERM_BP_DIRECT	GO:0060078~regulation of postsynaptic membrane potential	3	0.493421	0.0838816	GRIA1, GABRA1, RGS7BP	515	19	20094	6.16065	1	0.855408	0.835878
GOTERM_BP_DIRECT	GO:0018108~peptidyl-tyrosine phosphorylation	6	0.986842	0.0839784	PDGFRA, EDNRA, EFEMP1, NOD2, EGFR, EPHA3	515	91	20094	2.57258	1	0.855408	0.835878
GOTERM_BP_DIRECT	GO:0001569~branching involved in blood vessel morphogenesis	4	0.657895	0.086895	SEMA5A, EDNRA, LEF1, AHR	515	41	20094	3.80658	1	0.877875	0.857833
GOTERM_BP_DIRECT	GO:0032092~positive regulation of protein binding	6	0.986842	0.0870431	BMP2, WNT3A, CAV1, PLK2, WNT5A, NGF	515	92	20094	2.54462	1	0.877875	0.857833
GOTERM_BP_DIRECT	GO:0030512~negative regulation of transforming growth factor beta receptor signaling pathway	6	0.986842	0.0870431	BMP2, RASL11B, CAV1, WFIKKN2, PMEPA1, LDLRAD4	515	92	20094	2.54462	1	0.877875	0.857833
GOTERM_BP_DIRECT	GO:0007566~embryo implantation	5	0.822368	0.0885812	MMP2, EMP2, IGFBP7, PCSK5, IL11RA1	515	66	20094	2.95587	1	0.890459	0.870129
GOTERM_BP_DIRECT	GO:0031290~retinal ganglion cell axon guidance	3	0.493421	0.0916772	ROBO2, ALCAM, SEMA4F	515	20	20094	5.85262	1	0.901665	0.881079
GOTERM_BP_DIRECT	GO:1904707~positive regulation of vascular smooth muscle cell proliferation	4	0.657895	0.0918867	HPGD, MMP2, HTR1B, FGF2	515	42	20094	3.71595	1	0.901665	0.881079
GOTERM_BP_DIRECT	GO:0006887~exocytosis	7	1.15132	0.0932899	RPH3AL, KCNB1, SYT16, RAB27A, DOC2B, PRSS12, NKD2	515	122	20094	2.23871	1	0.901665	0.881079
GOTERM_BP_DIRECT	GO:0009410~response to xenobiotic stimulus	8	1.31579	0.0933735	TGFB2, MMP2, PDE3A, NFATC2, NCAM1, INHBA, AHR, PAM	515	151	20094	2.06715	1	0.901665	0.881079
GOTERM_BP_DIRECT	GO:0048468~cell development	4	0.657895	0.0969944	IRX5, IRX6, LEF1, ARID5B	515	43	20094	3.62953	1	0.901665	0.881079
GOTERM_BP_DIRECT	GO:0043542~endothelial cell migration	4	0.657895	0.0969944	GREM1, SNAI2, VSTM4, FGF2	515	43	20094	3.62953	1	0.901665	0.881079
GOTERM_BP_DIRECT	GO:0045664~regulation of neuron differentiation	4	0.657895	0.0969944	ZFHX3, EFNA3, BCL11B, NGF	515	43	20094	3.62953	1	0.901665	0.881079
GOTERM_BP_DIRECT	GO:0060842~arterial endothelial cell differentiation	2	0.328947	0.0984667	TMEM100, HEY2	515	4	20094	19.5087	1	0.901665	0.881079
GOTERM_BP_DIRECT	GO:2001170~negative regulation of ATP biosynthetic process	2	0.328947	0.0984667	ENTPD1, PID1	515	4	20094	19.5087	1	0.901665	0.881079
GOTERM_BP_DIRECT	GO:0070268~cornification	2	0.328947	0.0984667	CERS3, CYP26B1	515	4	20094	19.5087	1	0.901665	0.881079
GOTERM_BP_DIRECT	GO:0035582~sequestering of BMP in extracellular matrix	2	0.328947	0.0984667	NBL1, FBN1	515	4	20094	19.5087	1	0.901665	0.881079
GOTERM_BP_DIRECT	GO:0071806~protein transmembrane transport	2	0.328947	0.0984667	EDNRA, HPSE	515	4	20094	19.5087	1	0.901665	0.881079
GOTERM_BP_DIRECT	GO:2001199~negative regulation of dendritic cell differentiation	2	0.328947	0.0984667	TMEM176B, TMEM176A	515	4	20094	19.5087	1	0.901665	0.881079
GOTERM_BP_DIRECT	GO:0060675~ureteric bud morphogenesis	2	0.328947	0.0984667	WNT11, TACSTD2	515	4	20094	19.5087	1	0.901665	0.881079
GOTERM_BP_DIRECT	GO:0048050~post-embryonic eye morphogenesis	2	0.328947	0.0984667	EFEMP1, FBN1	515	4	20094	19.5087	1	0.901665	0.881079
GOTERM_BP_DIRECT	GO:0021828~gonadotrophin-releasing hormone neuronal migration to the hypothalamus	2	0.328947	0.0984667	NRP2, NDNF	515	4	20094	19.5087	1	0.901665	0.881079
GOTERM_BP_DIRECT	GO:0003093~regulation of glomerular filtration	2	0.328947	0.0984667	ADORA1, EMP2	515	4	20094	19.5087	1	0.901665	0.881079
GOTERM_BP_DIRECT	GO:0042481~regulation of odontogenesis	2	0.328947	0.0984667	PAX9, MSX1	515	4	20094	19.5087	1	0.901665	0.881079
GOTERM_BP_DIRECT	GO:0060571~morphogenesis of an epithelial fold	2	0.328947	0.0984667	EGFR, GDF7	515	4	20094	19.5087	1	0.901665	0.881079
GOTERM_BP_DIRECT	GO:0021773~striatal medium spiny neuron differentiation	2	0.328947	0.0984667	BCL11B, INHBA	515	4	20094	19.5087	1	0.901665	0.881079
GOTERM_BP_DIRECT	GO:0003220~left ventricular cardiac muscle tissue morphogenesis	2	0.328947	0.0984667	RYR2, EDNRA	515	4	20094	19.5087	1	0.901665	0.881079
GOTERM_BP_DIRECT	GO:1990523~bone regeneration	2	0.328947	0.0984667	POSTN, LGR6	515	4	20094	19.5087	1	0.901665	0.881079
GOTERM_BP_DIRECT	GO:0097118~neuroligin clustering involved in postsynaptic membrane assembly	2	0.328947	0.0984667	NRXN1, MAGI2	515	4	20094	19.5087	1	0.901665	0.881079
GOTERM_BP_DIRECT	GO:0035910~ascending aorta morphogenesis	2	0.328947	0.0984667	TGFB2, HEY2	515	4	20094	19.5087	1	0.901665	0.881079
GOTERM_BP_DIRECT	GO:0060437~lung growth	2	0.328947	0.0984667	PDGFRA, RSPO2	515	4	20094	19.5087	1	0.901665	0.881079
GOTERM_BP_DIRECT	GO:0030182~neuron differentiation	11	1.80921	0.099556	WNT10B, WNT11, IRX5, WNT3A, IRX6, MYT1L, ALDH1A2, WNT5A, NBL1, RUNX3, RUNX2	515	245	20094	1.75181	1	0.901665	0.881079
GOTERM_BP_DIRECT	GO:0055117~regulation of cardiac muscle contraction	3	0.493421	0.0996737	RYR2, ADORA1, ADRA1B	515	21	20094	5.57393	1	0.901665	0.881079
GOTERM_BP_DIRECT	GO:0001508~action potential	3	0.493421	0.0996737	KCNB1, KCNMB2, CACNA1G	515	21	20094	5.57393	1	0.901665	0.881079
GOTERM_BP_DIRECT	GO:2000311~regulation of AMPA receptor activity	3	0.493421	0.0996737	NLGN3, NRXN1, CACNG4	515	21	20094	5.57393	1	0.901665	0.881079
GOTERM_BP_DIRECT	GO:0051481~negative regulation of cytosolic calcium ion concentration	3	0.493421	0.0996737	RYR2, NPY1R, SLC8A1	515	21	20094	5.57393	1	0.901665	0.881079
GOTERM_BP_DIRECT	GO:0090050~positive regulation of cell migration involved in sprouting angiogenesis	3	0.493421	0.0996737	ANXA1, PLK2, FGF2	515	21	20094	5.57393	1	0.901665	0.881079
GOTERM_BP_DIRECT	GO:0060292~long term synaptic depression	3	0.493421	0.0996737	GRIA1, PLK2, ADORA1	515	21	20094	5.57393	1	0.901665	0.881079
GOTERM_BP_DIRECT	GO:0060322~head development	3	0.493421	0.0996737	OSR2, EDNRA, IL11RA1	515	21	20094	5.57393	1	0.901665	0.881079

## Sheet: GO-E12 5vsgroupE10 5_deg_down
Category	Term	Count	%	PValue	Genes	List Total	Pop Hits	Pop Total	Fold Enrichment	Bonferroni	Benjamini	FDR
GOTERM_BP_DIRECT	GO:0007275~multicellular organism development	108	13.0277	5.43071e-27	ZFP568, RTL1, SEMA5B, RAX, IKZF1, DACH2, CELSR2, CELSR3, SOX2, SOX3, DACH1, FGF8, PITX1, NKX2-9, EOMES, ISLR2, MITF, SHISA2, ISL1, MYT1, FANCD2, ALPK3, FREM2, NGEF, DLX1, DLX2, ADCYAP1R1, COL13A1, FOXG1, ARX, ADGRG1, NEUROD4, CDH20, HESX1, ALX3, OTX2, NKX6-1, NKX2-3, NKX2-2, FZD5, FZD4, GREB1, FZD8, SSC5D, TMEM198, DAB1, HOOK1, TLX2, LHX1, AGO2, NES, VSX2, RET, TRIM71, ROBO3, NR2E1, CHRDL1, EDA2R…	623	1095	20094	3.18118	1.75629e-23	1.75629e-23	1.71448e-23
GOTERM_BP_DIRECT	GO:0006355~regulation of transcription, DNA-templated	104	12.5452	1.12169e-20	ZFP568, FOXI2, RAX, IKZF1, CELSR2, SOX2, SOX3, DACH1, SOX1, CHEK2, PITX1, SOX4, PKNOX2, NKX2-9, EOMES, FOXH1, SOX13, TBR1, MITF, HMGA1B, POU3F1, ISL1, MYT1, POU3F2, MYCN, RFX4, PGR, DLX1, DLX2, SRCAP, IGSF1, FOXG1, ARX, GATA5, BHLHE22, GATA1, SCRT2, NEUROD4, HESX1, NKX2-1, ALX3, OTX2, NKX6-1, NKX2-3, NKX2-2, POU2F1, ZBTB16, HMGA1, NR2F1, POU2F2, SCRT1, LHX3, TLX2, LHX1, AGO2, LHX5, LHX4, VSX2, FO…	623	1237	20094	2.7117	3.62754e-17	1.81377e-17	1.77059e-17
GOTERM_BP_DIRECT	GO:0030182~neuron differentiation	42	5.06634	6.6695e-19	RET, BRSK2, FOXG1, WNT8B, NR2E1, BHLHE22, ASCL1, DLL1, CHRDL1, SOX2, SHH, NEUROD4, SALL1, FGF8, CCND1, FUT9, ZIC3, OTX2, NKX6-1, HES5, NKX2-2, EOMES, EMX1, GSX1, PAX6, ACSL4, TBR1, OLIG2, VAX1, ISL1, POU3F2, VAX2, POU4F1, HIPK2, DAB1, LHX3, DOK5, LHX1, NOVA2, LHX5, LHX4, FOXA2	623	245	20094	5.52919	2.15692e-15	7.18972e-16	7.01854e-16
GOTERM_BP_DIRECT	GO:0030154~cell differentiation	86	10.3739	4.22834e-17	TDRKH, SEMA5B, ROBO3, FOXE3, FOXE1, FOXI2, NR2E1, CHRDL1, EDA2R, SOX2, RIMS2, SOX3, SOX1, FGF8, ZIC2, ZIC3, PEG10, ZIC1, SPEG, SOX4, NKX3-2, NKX2-9, EOMES, SRRM4, NKX6-2, METRN, SOX13, NAV1, MITF, PAX6, FOXL1, PAX5, ISL1, MYT1, POU3F2, PAX2, ETV5, CIT, NR5A1, HAND1, KIT, RARB, NGEF, HEMGN, MEG3, FOXC2, DLX1, DLX2, ADCYAP1R1, COL13A1, MYRF, ARX, ILDR2, ASCL1, DLL1, DLL3, ADGRG1, NEUROD4, NKX2-1, O…	623	1022	20094	2.7141	1.36744e-13	2.73952e-14	2.6743e-14
GOTERM_BP_DIRECT	GO:0006357~regulation of transcription from RNA polymerase II promoter	114	13.7515	4.2355e-17	ZFP568, EPO, FOXI2, RAX, IKZF1, DACH2, IKZF2, SOX2, DACH1, SALL1, SALL3, SALL4, PITX1, ZFP442, PKNOX2, NKX2-9, EOMES, GM43517, NKX6-2, PRKCB, FOXH1, SOX13, TBR1, MITF, POU3F1, ISL1, MYT1, POU3F2, MYCN, RFX4, PGR, DLX1, DLX2, FOXG1, ARX, GATA5, BHLHE22, GATA1, NEUROD4, ZSCAN10, HESX1, NKX2-1, ALX3, OTX2, NKX6-1, NKX2-3, NKX2-2, POU2F1, ZBTB16, NR2F1, POU2F2, LHX3, TLX2, LHX1, SP6, TAF4B, LHX5, LHX…	623	1606	20094	2.28948	1.36976e-13	2.73952e-14	2.6743e-14
GOTERM_BP_DIRECT	GO:0007399~nervous system development	50	6.03136	6.75029e-15	RET, SEMA5B, ROBO3, NRSN1, CHRDL1, SOX1, ATCAY, ZIC2, DPYSL5, ZIC3, ZIC1, RGS9, SRRM4, ADGRV1, METRN, ISLR2, NAV1, PAX5, OLIG2, MYT1, POU3F2, CIT, ADGRB1, NGEF, BRSK2, ARX, LRP2, BHLHE22, ASCL1, DLL1, DLL3, ADGRG1, NEUROD4, FUT9, ERBB4, IGF2BP1, IGF2BP3, ECT2, APOB, HES5, NKX2-2, NR2F1, LHFPL4, ZIC5, VAX1, POU4F1, DAB1, NOVA2, LHX1, NES	623	438	20094	3.68192	2.19018e-11	3.63841e-12	3.55178e-12
GOTERM_BP_DIRECT	GO:0000122~negative regulation of transcription from RNA polymerase II promoter	78	9.40893	3.37894e-14	ZFP568, FOXE1, EPO, ENO1B, NR2E1, ENO1, IKZF1, SOX2, SOX3, SHH, JPH2, SOX1, DACH1, SALL1, CCND1, SALL4, DNMT3B, NKX3-2, EOMES, NKX6-2, FOXH1, SOX13, PAWR, MITF, PAX6, PROX1, PAX5, OLIG2, POU3F1, ISL1, PAX2, ETV5, ZFP819, RIPPLY3, CCNE1, HAND1, TFEC, RARB, IRF8, LCOR, SINHCAF, HMX1, FOXC2, DLX1, DLX2, MAGEL2, ZBTB46, UHRF1, FOXG1, ARX, GATA5, ZBTB42, PRDM12, ASCL1, BARX2, GATA1, SCRT2, NRIP1, BEND…	623	975	20094	2.58029	1.0915e-10	1.56107e-11	1.5239e-11
GOTERM_BP_DIRECT	GO:0007417~central nervous system development	23	2.77443	1.34504e-11	EMX1, SHC3, GSX1, NCAN, ZBTB16, CHD7, GSX2, ZIC4, MSI1, ZIC5, VAX1, VAX2, PAX2, HAPLN1, CYP26A1, SHH, DAB1, CYP26C1, ZIC2, ZIC3, ZIC1, NRCAM, OTX2	623	119	20094	6.23389	4.34984e-08	5.43732e-09	5.30786e-09
GOTERM_BP_DIRECT	GO:0045944~positive regulation of transcription from RNA polymerase II promoter	81	9.77081	1.21978e-10	ONECUT2, CHD7, RAX, IKZF1, IKZF2, SOX2, SOX3, SHH, SOX1, SALL1, ZIC2, ZIC3, SALL4, NAMPT, ZIC1, PITX1, SOX4, NKX2-9, EOMES, SLC11A1, FOXH1, MITF, PAX6, TBR1, HMGA1B, PROX1, PAX5, POU3F1, ISL1, MYT1, POU3F2, PAX2, ETV5, NR5A1, TOX2, MYCN, RFX4, HAND1, TFEC, RARB, IRF8, PGR, VGLL2, FOXC2, DLX1, DLX2, GATA5, ASCL1, DLL1, BARX2, GATA1, NRIP1, NKX2-1, OTX2, NKX2-3, HES5, NKX2-2, POU2F1, FZD5, GSX1, CD…	623	1216	20094	2.14847	3.94476e-07	4.38307e-08	4.27871e-08
GOTERM_BP_DIRECT	GO:0043010~camera-type eye development	18	2.17129	2.93167e-10	FOXC2, FOXE3, LAMA1, CHD7, RAX, PAX6, MITF, NR2E1, VAX1, VAX2, PAX2, SHH, NEUROD4, GPD2, HESX1, BMPR1B, HES5, VSX2	623	80	20094	7.25706	9.48102e-07	9.48103e-08	9.25529e-08
GOTERM_BP_DIRECT	GO:0048663~neuron fate commitment	13	1.56815	4.41837e-10	NKX6-2, GSX1, GSX2, OLIG2, ASCL1, EPOP, ISL1, POU3F2, SOX2, SHH, GBX1, NKX2-1, OTX2	623	36	20094	11.6471	1.4289e-06	1.299e-07	1.26807e-07
GOTERM_BP_DIRECT	GO:0009653~anatomical structure morphogenesis	16	1.93004	4.3832e-09	RET, EOMES, FOXC2, FOXE3, FOXE1, ONECUT2, FOXI2, FOXL1, SOX2, SOX3, SOX1, LHX1, PITX1, SOX4, FREM2, FOXA2	623	72	20094	7.16747	1.41752e-05	1.18127e-06	1.15315e-06
GOTERM_BP_DIRECT	GO:0030900~forebrain development	18	2.17129	4.8122e-09	FOXG1, ARX, NR2F1, PAX6, LRP2, ZIC5, IKZF1, POU3F1, VAX2, SSTR4, SOX2, SOX3, SHH, SOX1, ZIC3, ZIC1, HESX1, OTX2	623	95	20094	6.11121	1.55625e-05	1.19713e-06	1.16862e-06
GOTERM_BP_DIRECT	GO:0048665~neuron fate specification	10	1.20627	8.54574e-09	DMRTA2, GSX2, OTX2, ASCL1, POU3F2, POU4F1, ISL1, DLL1, FOXA2, NKX2-2	623	22	20094	14.6607	2.76365e-05	1.97406e-06	1.92706e-06
GOTERM_BP_DIRECT	GO:0048709~oligodendrocyte differentiation	14	1.68878	1.48113e-08	DLX1, DLX2, NKX6-2, MYRF, OLIG2, ASCL1, VTN, SHH, NEUROD4, NKX2-1, OTX2, NKX6-1, HES5, NKX2-2	623	57	20094	7.92194	4.78986e-05	3.19331e-06	3.11728e-06
GOTERM_BP_DIRECT	GO:0045165~cell fate commitment	16	1.93004	3.36922e-08	NKX6-2, ONECUT2, SOX13, GATA5, WNT8B, PAX6, MITF, NR2E1, GATA1, SOX2, SHH, FGF8, NEUROD4, ERBB4, OTX2, VSX2	623	83	20094	6.21756	0.000108955	6.81003e-06	6.64788e-06
GOTERM_BP_DIRECT	GO:0021796~cerebral cortex regionalization	7	0.844391	6.66435e-08	EOMES, EMX1, DMRTA2, ADGRG1, NR2F1, PAX6, BHLHE22	623	9	20094	25.0861	0.000215502	1.26779e-05	1.23761e-05
GOTERM_BP_DIRECT	GO:0021772~olfactory bulb development	10	1.20627	1.96886e-07	EOMES, DLX2, SALL1, ZIC3, CHD7, ZIC1, ARX, GSX2, PAX6, NR2E1	623	30	20094	10.7512	0.000636527	3.50822e-05	3.42469e-05
GOTERM_BP_DIRECT	GO:0007389~pattern specification process	13	1.56815	2.06111e-07	CDX1, GSX2, RAX, SHROOM3, ASCL1, ACVR2B, SHH, ZIC3, LHX1, ZIC1, NKX2-1, ALX3, FOXA2	623	59	20094	7.10673	0.00066634	3.50822e-05	3.42469e-05
GOTERM_BP_DIRECT	GO:0021879~forebrain neuron differentiation	7	0.844391	3.47558e-07	SOX2, DLX1, DLX2, SOX1, NKX2-1, LHX5, ASCL1	623	11	20094	20.525	0.00112337	5.62002e-05	5.48621e-05
GOTERM_BP_DIRECT	GO:0048708~astrocyte differentiation	9	1.08565	5.46957e-07	EOMES, SHH, DAB1, MYCN, PAX6, NR2E1, VAX1, HES5, NKX2-2	623	25	20094	11.6113	0.0017673	8.42314e-05	8.22259e-05
GOTERM_BP_DIRECT	GO:0045893~positive regulation of transcription, DNA-templated	48	5.79011	9.73816e-07	RET, MEG3, FOXC2, FOXE1, MSTN, MYRF, EPO, CITED4, GATA5, IKZF1, GATA1, SOX2, SHH, SALL1, ZIC2, ERBB4, ZIC3, CHEK2, ZIC1, NKX2-1, OTX2, SOX4, HES5, EOMES, KCNH2, FZD4, ZBTB16, FOXH1, HMGA1, PAX6, MITF, HMGA1B, PAX5, POU2F2, POU3F1, MT3, PAX2, ETV5, KLF1, HIPK2, NR5A1, MYCN, LHX3, LHX1, IRF8, LHX5, PGR, FOXA2	623	712	20094	2.1744	0.00314437	0.000143151	0.000139743
GOTERM_BP_DIRECT	GO:0045665~negative regulation of neuron differentiation	14	1.68878	1.14934e-06	FOXG1, PAX6, OLIG2, NR2E1, ASCL1, ISL1, DLL1, CIT, SOX2, SOX3, SHH, HES5, NKX2-2, FOXA2	623	81	20094	5.5747	0.00371007	0.000161607	0.00015776
GOTERM_BP_DIRECT	GO:0097154~GABAergic neuron differentiation	7	0.844391	1.22415e-06	DLX1, DLX2, SALL1, GSX2, NKX2-1, BHLHE22, ASCL1	623	13	20094	17.3673	0.00395108	0.000164954	0.000161027
GOTERM_BP_DIRECT	GO:0001764~neuron migration	19	2.29192	1.4002e-06	EOMES, ROBO3, HSP90AA1, USP9X, ITGA3, ARX, NR2F1, NAV1, PAX6, ASCL1, VAX1, POU4F1, CELSR2, CELSR3, DAB1, NEUROD4, SOX1, NKX2-1, NKX6-1	623	154	20094	3.97934	0.00451803	0.00018113	0.000176818
GOTERM_BP_DIRECT	GO:0021987~cerebral cortex development	14	1.68878	2.01979e-06	EOMES, EMX1, FOXG1, ATP1A3, PAX6, TBR1, PAX5, WDR62, NR2E1, ASCL1, SOX2, TH, MGARP, GART	623	85	20094	5.31236	0.00651073	0.000248783	0.000242859
GOTERM_BP_DIRECT	GO:0007405~neuroblast proliferation	11	1.3269	2.07704e-06	SOX2, DMRTA2, SHH, NEUROD4, FOXG1, PAX6, NR2E1, PROX1, ASCL1, VAX1, VSX2	623	49	20094	7.24061	0.00669463	0.000248783	0.000242859
GOTERM_BP_DIRECT	GO:0007507~heart development	27	3.25694	2.20496e-06	FOXC2, LRP2, ASCL1, SHH, SALL1, FGF8, ERBB4, ZIC3, RPS6KA2, SALL4, SOX4, ITGA3, TXNRD2, CAD, SYPL2, FOXL1, ISL1, ACVR2B, POU4F1, RIPPLY3, FGF15, TH, HAND1, PKP2, ATM, ALPK3, FREM2	623	298	20094	2.92231	0.00710548	0.000254673	0.000248609
GOTERM_BP_DIRECT	GO:0001501~skeletal system development	16	1.93004	4.55783e-06	FOXC2, COL13A1, WFIKKN1, NCAN, ZBTB16, CHD7, ACVR2B, HAPLN1, DLL3, RECQL4, ZIC3, ZIC1, BMPR1B, PITX1, SOX4, NKX3-2	623	120	20094	4.30048	0.014632	0.000508277	0.000496175
GOTERM_BP_DIRECT	GO:0045666~positive regulation of neuron differentiation	15	1.80941	9.43229e-06	EPO, FOXG1, ASCL1, ETV5, SOX2, SHH, LIN28A, DAB1, SALL1, VWC2, DNMT3B, ECT2, NKX6-1, NKX2-2, FOXA2	623	112	20094	4.31968	0.0300436	0.000999598	0.000975798
GOTERM_BP_DIRECT	GO:0045892~negative regulation of transcription, DNA-templated	43	5.18697	9.5818e-06	ZFP568, MEG3, MAGEL2, FOXG1, ENO1B, ENO1, BHLHE22, IKZF1, ASCL1, ING4, TRIM6, JPH2, DACH1, SALL1, BTAF1, ZIC2, ZSCAN10, HESX1, NKX2-1, DNMT3B, PITX1, HES5, DUSP5, NKX6-2, POU2F1, ZBTB16, HMGA1, SOX13, NR0B1, TBR1, HMGA1B, PAX5, PROX1, POU3F1, ISL1, MT3, PAX2, ZFP819, MYBBP1A, LHX1, HAND1, RCOR2, HMX1	623	662	20094	2.09502	0.0305125	0.000999598	0.000975798
GOTERM_BP_DIRECT	GO:0021527~spinal cord association neuron differentiation	6	0.723764	2.92794e-05	LHX3, GSX1, LHX1, GSX2, LHX5, ASCL1	623	13	20094	14.8863	0.090346	0.00295905	0.0028886
GOTERM_BP_DIRECT	GO:0021983~pituitary gland development	8	0.965018	4.51378e-05	SOX3, SALL1, LHX3, HESX1, NKX2-1, PAX6, PITX1, ISL1	623	32	20094	8.0634	0.135824	0.0044235	0.00431818
GOTERM_BP_DIRECT	GO:0009791~post-embryonic development	14	1.68878	4.75916e-05	MEG3, EMX1, USP9X, SCHIP1, MYT1, ACVR2B, DLK1, TAL2, LHX1, AGO2, ATM, APOB, NKX2-3, LLGL2	623	113	20094	3.99602	0.142655	0.0045268	0.00441902
GOTERM_BP_DIRECT	GO:0048863~stem cell differentiation	11	1.3269	5.59396e-05	SOX2, DMRTA2, LIN28A, ZIC3, ZSCAN10, KIT, HESX1, A2M, EPOP, ISL1, PAX2	623	70	20094	5.06842	0.165493	0.00516882	0.00504575
GOTERM_BP_DIRECT	GO:0071542~dopaminergic neuron differentiation	8	0.965018	8.31991e-05	DMRTA2, SHH, FGF8, OTX2, VEGFD, PAX5, PAX2, FOXA2	623	35	20094	7.37225	0.235916	0.00747405	0.0072961
GOTERM_BP_DIRECT	GO:0006836~neurotransmitter transport	9	1.08565	8.7229e-05	RIMS2, RIMS4, RIMS3, SLC32A1, SLC6A15, SLC6A13, SLC6A11, SLC6A1, CPLX3	623	47	20094	6.17622	0.24581	0.00762429	0.00744275
GOTERM_BP_DIRECT	GO:0060041~retina development in camera-type eye	12	1.44753	9.36548e-05	RET, CRB1, NEUROD4, MFRP, LAMA1, LHX1, CHD7, PAX6, NR2E1, BMPR1B, VAX2, DLL1	623	89	20094	4.3488	0.261322	0.00797052	0.00778074
GOTERM_BP_DIRECT	GO:0021892~cerebral cortex GABAergic interneuron differentiation	4	0.482509	0.000115358	DLX1, DLX2, NKX2-1, ASCL1	623	4	20094	32.2536	0.311395	0.00941553	0.00919135
GOTERM_BP_DIRECT	GO:0097150~neuronal stem cell population maintenance	7	0.844391	0.000116457	SOX2, FANCD2, IGF2BP1, PROX1, WDR62, DLL1, HES5	623	26	20094	8.68366	0.313839	0.00941553	0.00919135
GOTERM_BP_DIRECT	GO:0031018~endocrine pancreas development	7	0.844391	0.000145838	NKX6-2, ONECUT2, NKX6-1, MYT1, SOX4, FOXA2, NKX2-2	623	27	20094	8.36205	0.376043	0.0115034	0.0112295
GOTERM_BP_DIRECT	GO:0010628~positive regulation of gene expression	36	4.34258	0.000156337	RET, TFRC, ARX, GATA5, WNT8B, IKZF1, DLL1, TTBK1, RIMS2, SHH, TRIM6, FGF8, RPS6KA2, PLCG2, NKX2-1, DNMT3B, ITGB8, APOB, NKX2-2, ITGA3, SLC11A1, PAWR, PAX6, MITF, POU3F1, MYT1, MT3, POU4F1, KLF1, NR5A1, FGF15, MYCN, RNF207, KIT, AGO2, ATM	623	583	20094	1.99165	0.396877	0.0119573	0.0116726
GOTERM_BP_DIRECT	GO:0009952~anterior/posterior pattern specification	14	1.68878	0.000158987	CDX1, ZBTB16, FOXH1, PAX6, ACVR2B, HIPK2, CYP26A1, SHH, CYP26C1, ZIC3, LHX1, OTX2, HES5, FOXA2	623	127	20094	3.55552	0.402025	0.0119573	0.0116726
GOTERM_BP_DIRECT	GO:0060563~neuroepithelial cell differentiation	6	0.723764	0.000171387	EMX1, FGF8, OTX2, VAX1, DLL1, SOX4	623	18	20094	10.7512	0.425532	0.0125969	0.012297
GOTERM_BP_DIRECT	GO:0006306~DNA methylation	7	0.844391	0.000180789	EOMES, MEG3, HELLS, BEND3, DNMT3B, BAZ2A, PAX6	623	28	20094	8.0634	0.442741	0.0129927	0.0126834
GOTERM_BP_DIRECT	GO:0006096~glycolytic process	8	0.965018	0.000201736	PKM, PKLR, ENO1B, ENO1, ENO3, GAPDH, ENO4, HK2	623	40	20094	6.45072	0.479247	0.0140825	0.0137472
GOTERM_BP_DIRECT	GO:0042493~response to drug	24	2.89505	0.000204662	RET, EMX1, ADCYAP1R1, ITGA3, PRKCB, ATP1A3, GAD2, WFDC1, SLC6A11, AK4, LRP8, ENO3, HSPD1, HSD11B2, LDHA, FABP3, DAB1, CCND1, SCNN1B, ALDH1A1, DNMT3B, RAD54L, NCKAP1L, NKX6-1	623	324	20094	2.38916	0.484152	0.0140825	0.0137472
GOTERM_BP_DIRECT	GO:0001709~cell fate determination	6	0.723764	0.0002267	HAND1, PAX6, PROX1, CHRDL1, PAX2, DLL3	623	19	20094	10.1854	0.519645	0.0152739	0.0149102
GOTERM_BP_DIRECT	GO:0009953~dorsal/ventral pattern formation	9	1.08565	0.000238667	SHH, FGF8, LHX3, LHX1, FOXG1, OTX2, PAX6, BMPR1B, FOXA2	623	54	20094	5.3756	0.537885	0.015752	0.015377
GOTERM_BP_DIRECT	GO:0021529~spinal cord oligodendrocyte cell differentiation	4	0.482509	0.00028174	SOX13, OLIG2, ASCL1, NKX2-2	623	5	20094	25.8029	0.597989	0.0175221	0.0171049
GOTERM_BP_DIRECT	GO:0021521~ventral spinal cord interneuron specification	4	0.482509	0.00028174	SHH, SOX1, LHX3, DBX1	623	5	20094	25.8029	0.597989	0.0175221	0.0171049
GOTERM_BP_DIRECT	GO:0021544~subpallium development	4	0.482509	0.00028174	DLX1, DLX2, FGF8, GSX2	623	5	20094	25.8029	0.597989	0.0175221	0.0171049
GOTERM_BP_DIRECT	GO:0007420~brain development	21	2.53317	0.000347792	EOMES, EMX1, FOXG1, GSX2, RAX, SLC6A11, PAX6, AK4, ATP2B1, NR2E1, POU3F1, VAX1, POU3F2, ADGRG1, ZIC1, HESX1, NKX2-1, ATM, SLC38A3, NES, HES5	623	273	20094	2.48105	0.675333	0.0212219	0.0207166
GOTERM_BP_DIRECT	GO:0006366~transcription from RNA polymerase II promoter	19	2.29192	0.000441034	NKX2-9, FOXE3, POU2F1, GSX1, CHD7, PAX6, PROX1, ISL1, BARX2, GATA1, NR5A1, SALL1, LHX1, SP6, LCOR, TAF4B, NKX6-1, NKX2-3, FOXA2	623	237	20094	2.58573	0.75988	0.026413	0.0257841
GOTERM_BP_DIRECT	GO:0042472~inner ear morphogenesis	10	1.20627	0.000453004	SOX2, ALDH1A3, FGF8, FOXG1, CHD7, ZIC1, OTX2, OTOP1, DLL1, PAX2	623	74	20094	4.3586	0.769002	0.0266366	0.0260024
GOTERM_BP_DIRECT	GO:0010001~glial cell differentiation	6	0.723764	0.000475401	CRB1, NEUROD4, METRN, ASCL1, POU3F1, PAX2	623	22	20094	8.79644	0.785149	0.0274544	0.0268007
GOTERM_BP_DIRECT	GO:0097475~motor neuron migration	5	0.603136	0.000520171	NEUROD4, DAB1, ASCL1, CELSR2, CELSR3	623	13	20094	12.4052	0.814123	0.0295128	0.0288102
GOTERM_BP_DIRECT	GO:0006868~glutamine transport	4	0.482509	0.0005505	SLC38A1, SLC1A5, SLC38A3, SLC38A5	623	6	20094	21.5024	0.831498	0.0302175	0.029498
GOTERM_BP_DIRECT	GO:0002052~positive regulation of neuroblast proliferation	7	0.844391	0.000551278	SOX2, DMRTA2, SHH, FOXG1, PAX6, NR2E1, WDR62	623	34	20094	6.64045	0.831922	0.0302175	0.029498
GOTERM_BP_DIRECT	GO:0035725~sodium ion transmembrane transport	10	1.20627	0.000609179	ASIC4, SCN11A, SCNN1B, SLC6A15, SLC6A13, SLC6A11, SCN5A, SLC6A1, SLC4A4, SCN4B	623	77	20094	4.18878	0.860638	0.0328347	0.0320529
GOTERM_BP_DIRECT	GO:0035116~embryonic hindlimb morphogenesis	7	0.844391	0.000648122	SHH, FGF8, ZBTB16, CHD7, ALX3, RARB, PITX1	623	35	20094	6.45072	0.87714	0.0338069	0.033002
GOTERM_BP_DIRECT	GO:0031016~pancreas development	7	0.844391	0.000648122	SHH, ONECUT2, ILDR2, ISL1, ACVR2B, NKX3-2, PAX2	623	35	20094	6.45072	0.87714	0.0338069	0.033002
GOTERM_BP_DIRECT	GO:0006978~DNA damage response, signal transduction by p53 class mediator resulting in transcription of p21 class mediator	5	0.603136	0.000710484	ING4, RBM38, RPS6KA6, CHEK2, HIPK2	623	14	20094	11.5191	0.899593	0.0364715	0.0356032
GOTERM_BP_DIRECT	GO:0021798~forebrain dorsal/ventral pattern formation	4	0.482509	0.000941217	FGF8, GSX2, NKX2-1, PAX6	623	7	20094	18.4306	0.952419	0.0470297	0.0459099
GOTERM_BP_DIRECT	GO:0021794~thalamus development	5	0.603136	0.000945247	CNTNAP2, SHH, TAL2, PTCHD1, OLIG2	623	15	20094	10.7512	0.953036	0.0470297	0.0459099
GOTERM_BP_DIRECT	GO:0022008~neurogenesis	10	1.20627	0.00105381	EOMES, FOXG1, FABP7, RARB, NAV1, BHLHE22, PRDM12, WDR62, NKX6-1, ASCL1	623	83	20094	3.88598	0.966953	0.0516369	0.0504075
GOTERM_BP_DIRECT	GO:0007224~smoothened signaling pathway	11	1.3269	0.00115173	SHH, SALL1, PTCHD1, SALL3, ZIC3, PAX6, NKX6-1, HES5, FOXA2, NKX2-2, HIPK2	623	101	20094	3.51277	0.975932	0.0555927	0.054269
GOTERM_BP_DIRECT	GO:0009887~animal organ morphogenesis	14	1.68878	0.00122355	LAMA1, CDX1, WNT8B, PAX5, PALB2, DLL1, SOX3, FGF15, FGF8, TH, NKX2-1, OTX2, LHX4, E2F5	623	157	20094	2.87612	0.980925	0.0581905	0.056805
GOTERM_BP_DIRECT	GO:0021978~telencephalon regionalization	4	0.482509	0.00147136	SHH, GSX2, OTX2, PAX6	623	8	20094	16.1268	0.991451	0.067977	0.0663585
GOTERM_BP_DIRECT	GO:0048318~axial mesoderm development	4	0.482509	0.00147136	EPB41L5, ZIC2, ZIC3, FOXH1	623	8	20094	16.1268	0.991451	0.067977	0.0663585
GOTERM_BP_DIRECT	GO:0048712~negative regulation of astrocyte differentiation	5	0.603136	0.00156895	DAB1, MYCN, NR2E1, HES5, DLL3	623	17	20094	9.48636	0.993767	0.0695066	0.0678517
GOTERM_BP_DIRECT	GO:0061621~canonical glycolysis	5	0.603136	0.00156895	PKM, ENO1B, ENO1, ENO3, GAPDH	623	17	20094	9.48636	0.993767	0.0695066	0.0678517
GOTERM_BP_DIRECT	GO:0060042~retina morphogenesis in camera-type eye	5	0.603136	0.00156895	SOX2, CRB1, BHLHE22, DLL1, VSX2	623	17	20094	9.48636	0.993767	0.0695066	0.0678517
GOTERM_BP_DIRECT	GO:0003333~amino acid transmembrane transport	6	0.723764	0.00179295	SLC38A1, SLC32A1, SLC38A8, SLC38A3, SLC38A5, SLC25A13	623	29	20094	6.67316	0.996983	0.077312	0.0754713
GOTERM_BP_DIRECT	GO:0055010~ventricular cardiac muscle tissue morphogenesis	6	0.723764	0.00179295	FOXC2, EPO, HAND1, PKP2, PROX1, ISL1	623	29	20094	6.67316	0.996983	0.077312	0.0754713
GOTERM_BP_DIRECT	GO:0045597~positive regulation of cell differentiation	9	1.08565	0.00184584	SOX2, DLX1, DLX2, SHH, NEUROD4, CCNE1, BMPR1B, ISL1, NKX2-2	623	73	20094	3.97647	0.997458	0.0775325	0.0756865
GOTERM_BP_DIRECT	GO:0035556~intracellular signal transduction	27	3.25694	0.00184601	CNTNAP2, BRSK2, SHC3, RGS14, TFRC, CCDC68, RPS6KA6, NUAK2, RPS6KA2, PLCG2, ECT2, PAK3, RGS9, GUCY1A2, PRKCB, MCF2, MAPK12, CIT, VAV2, ARHGAP45, DAB1, SPATA13, KIT, PLCH1, SIK2, DGKK, SPSB4	623	450	20094	1.93522	0.99746	0.0775325	0.0756865
GOTERM_BP_DIRECT	GO:0048715~negative regulation of oligodendrocyte differentiation	5	0.603136	0.00196825	DLX1, DLX2, NKX6-2, NKX6-1, HES5	623	18	20094	8.95934	0.998291	0.0812112	0.0792776
GOTERM_BP_DIRECT	GO:0007219~Notch signaling pathway	12	1.44753	0.00198855	SOX2, FOXC2, DLX1, DLX2, NEUROD4, GSX2, DTX4, ASCL1, DLL1, HES5, FOXA2, DLL3	623	127	20094	3.04759	0.998399	0.0812112	0.0792776
GOTERM_BP_DIRECT	GO:0021766~hippocampus development	10	1.20627	0.00202131	DLX1, DLX2, DAB1, SLC32A1, ZIC3, USP9X, ZIC1, NKX2-1, LHX5, LRP8	623	91	20094	3.54435	0.998561	0.0812112	0.0792776
GOTERM_BP_DIRECT	GO:0010467~gene expression	17	2.05066	0.00203721	EOMES, CRB1, RTL1, CNTNAP2, WNT8B, PAX6, TBR1, SOX2, SHH, ZIC2, ZIC3, SCNN1B, ZIC1, HESX1, NKX2-1, SOX4, FOXA2	623	228	20094	2.40487	0.998633	0.0812112	0.0792776
GOTERM_BP_DIRECT	GO:0006811~ion transport	33	3.9807	0.00205916	CLIC6, CHRNA7, KCNC3, CHRNA6, KCNA3, ATP1A3, GRIK2, ATP2C2, SLC4A4, BEST3, CLCN1, TRPM1, ASIC4, ATP7B, SCN11A, SLC38A8, SCN5A, SLC38A3, KCNH2, SLC13A3, MCOLN3, SLC38A1, KCNJ12, SLC6A15, SLC11A1, ATP2B1, OTOP1, HTR3B, CP, TMC4, CLDN10, SCNN1B, SCN4B	623	599	20094	1.77691	0.998727	0.0812112	0.0792776
GOTERM_BP_DIRECT	GO:0048935~peripheral nervous system neuron development	4	0.482509	0.00215644	ONECUT2, ASCL1, POU4F1, ISL1	623	9	20094	14.3349	0.999071	0.0840234	0.0820228
GOTERM_BP_DIRECT	GO:0006814~sodium ion transport	12	1.44753	0.00239184	SLC13A3, ASIC4, SLC38A1, SCN11A, SCNN1B, SLC6A15, ATP1A3, SLC38A8, SCN5A, SLC38A3, SLC4A4, SCN4B	623	130	20094	2.97726	0.999567	0.0916816	0.0894987
GOTERM_BP_DIRECT	GO:0021537~telencephalon development	6	0.723764	0.00243804	EMX1, FGF8, RFX4, LHX1, NKX2-1, HES5	623	31	20094	6.24263	0.999627	0.0916816	0.0894987
GOTERM_BP_DIRECT	GO:0021522~spinal cord motor neuron differentiation	6	0.723764	0.00243804	SHH, GBX1, OLIG2, ISL1, SOX4, NKX2-2	623	31	20094	6.24263	0.999627	0.0916816	0.0894987
GOTERM_BP_DIRECT	GO:0007601~visual perception	13	1.56815	0.00276965	CRB1, ADGRV1, ABCA4, NR2E1, VAX2, CPLX3, TRPM1, MFRP, ZIC2, TH, RGS9BP, RGS9, VSX2	623	152	20094	2.75853	0.999873	0.102144	0.0997124
GOTERM_BP_DIRECT	GO:0021530~spinal cord oligodendrocyte cell fate specification	3	0.361882	0.00281102	OLIG2, ASCL1, NKX2-2	623	3	20094	32.2536	0.999889	0.102144	0.0997124
GOTERM_BP_DIRECT	GO:0002072~optic cup morphogenesis involved in camera-type eye development	3	0.361882	0.00281102	ALDH1A3, ALDH1A1, PAX2	623	3	20094	32.2536	0.999889	0.102144	0.0997124
GOTERM_BP_DIRECT	GO:0008283~cell proliferation	22	2.6538	0.00290393	CNTNAP2, FOXC2, ZBTB16, MCM10, PAX6, VEGFD, LRP2, NR2E1, PROX1, ISL1, GATA1, HIPK2, SHH, RIPPLY3, FGF8, DACH1, MYCN, CCND1, KIT, RARB, NKX6-1, VSX2	623	348	20094	2.03902	0.999918	0.104348	0.101864
GOTERM_BP_DIRECT	GO:0048382~mesendoderm development	4	0.482509	0.00301012	EOMES, LHX1, OTX2, FOXA2	623	10	20094	12.9014	0.999942	0.105812	0.103293
GOTERM_BP_DIRECT	GO:0021517~ventral spinal cord development	4	0.482509	0.00301012	DAB1, LHX1, PAX6, LRP8	623	10	20094	12.9014	0.999942	0.105812	0.103293
GOTERM_BP_DIRECT	GO:0050767~regulation of neurogenesis	7	0.844391	0.00313443	SOX2, CHD7, PAX6, ASCL1, POU4F1, DLL1, HES5	623	47	20094	4.80373	0.999961	0.108997	0.106402
GOTERM_BP_DIRECT	GO:0001822~kidney development	14	1.68878	0.00320471	HELLS, FOXC2, SCHIP1, GREB1L, LRP2, PROX1, ACVR2B, PAX2, CYP26A1, SHH, FGF8, SALL1, LHX1, FREM2	623	175	20094	2.58029	0.999969	0.109041	0.106445
GOTERM_BP_DIRECT	GO:0017156~calcium ion regulated exocytosis	6	0.723764	0.00323685	RIMS2, SYT2, RIMS3, CLTRN, SYT12, SYT7	623	33	20094	5.86429	0.999972	0.109041	0.106445
GOTERM_BP_DIRECT	GO:0048714~positive regulation of oligodendrocyte differentiation	6	0.723764	0.00323685	SHH, NKX6-2, GSX2, OLIG2, NKX6-1, NKX2-2	623	33	20094	5.86429	0.999972	0.109041	0.106445
GOTERM_BP_DIRECT	GO:0007267~cell-cell signaling	9	1.08565	0.00356303	SHH, GJB3, LHX1, GJB5, WNT8B, LHX5, CXCL13, GATA1, DLL1	623	81	20094	3.58373	0.99999	0.11803	0.11522
GOTERM_BP_DIRECT	GO:0030539~male genitalia development	5	0.603136	0.00357667	SOX2, SHH, FGF8, GREB1L, DHCR24	623	21	20094	7.67943	0.999991	0.11803	0.11522
GOTERM_BP_DIRECT	GO:0071276~cellular response to cadmium ion	6	0.723764	0.00369988	SOX2, HESX1, MT2, MT1, MT3, FOXA2	623	34	20094	5.69181	0.999994	0.119654	0.116805
GOTERM_BP_DIRECT	GO:0008045~motor neuron axon guidance	6	0.723764	0.00369988	FGF8, LHX3, KIF5C, LHX1, LHX4, RNF165	623	34	20094	5.69181	0.999994	0.119654	0.116805
GOTERM_BP_DIRECT	GO:0048048~embryonic eye morphogenesis	4	0.482509	0.00404432	ALDH1A3, ALDH1A1, RARB, VAX2	623	11	20094	11.7286	0.999998	0.128229	0.125176
GOTERM_BP_DIRECT	GO:0090009~primitive streak formation	4	0.482509	0.00404432	ZIC3, LHX1, OTX2, FOXA2	623	11	20094	11.7286	0.999998	0.128229	0.125176
GOTERM_BP_DIRECT	GO:0035264~multicellular organism growth	12	1.44753	0.00423709	MEG3, CNTNAP2, TAL2, SCNN1B, GPD2, HESX1, RARB, ATM, PALB2, DLK1, SPTBN2, LLGL2	623	140	20094	2.7646	0.999999	0.131388	0.128259
GOTERM_BP_DIRECT	GO:0048646~anatomical structure formation involved in morphogenesis	5	0.603136	0.00426584	SOX2, SHH, LHX1, NKX2-1, FOXA2	623	22	20094	7.33037	0.999999	0.131388	0.128259
GOTERM_BP_DIRECT	GO:0060384~innervation	5	0.603136	0.00426584	RET, CHD7, POU4F1, ISL1, RNF165	623	22	20094	7.33037	0.999999	0.131388	0.128259
GOTERM_BP_DIRECT	GO:0001843~neural tube closure	10	1.20627	0.00438383	TRIM71, CECR2, SALL1, ZIC2, MTHFD1L, SALL4, SHROOM3, LRP2, ZIC5, PAX2	623	102	20094	3.16212	0.999999	0.133748	0.130564
GOTERM_BP_DIRECT	GO:0001755~neural crest cell migration	7	0.844391	0.00521955	RET, SEMA5B, SHH, FGF15, ERBB4, PAX6, ISL1	623	52	20094	4.34183	1	0.156341	0.152619
GOTERM_BP_DIRECT	GO:0048791~calcium ion-regulated exocytosis of neurotransmitter	4	0.482509	0.00526938	RIMS2, SYT2, RIMS3, SYT7	623	12	20094	10.7512	1	0.156341	0.152619
GOTERM_BP_DIRECT	GO:1904936~interneuron migration	4	0.482509	0.00526938	SOX1, ARX, NR2F1, NKX2-1	623	12	20094	10.7512	1	0.156341	0.152619
GOTERM_BP_DIRECT	GO:0061351~neural precursor cell proliferation	6	0.723764	0.00537201	CNTNAP2, ADGRG1, RARB, PAX6, NR2E1, ASCL1	623	37	20094	5.23032	1	0.15738	0.153632
GOTERM_BP_DIRECT	GO:0001947~heart looping	8	0.965018	0.00540171	EOMES, SHH, FGF8, ZIC3, HAND1, FOXH1, TBR1, DLL1	623	69	20094	3.73955	1	0.15738	0.153632
GOTERM_BP_DIRECT	GO:0045686~negative regulation of glial cell differentiation	3	0.361882	0.00550669	NKX6-2, LIN28A, NKX6-1	623	4	20094	24.1902	1	0.157599	0.153846
GOTERM_BP_DIRECT	GO:0032889~regulation of vacuole fusion, non-autophagic	3	0.361882	0.00550669	ENO1, ENO3, ENO4	623	4	20094	24.1902	1	0.157599	0.153846
GOTERM_BP_DIRECT	GO:0007411~axon guidance	14	1.68878	0.00585463	MEG3, ROBO3, SEMA5B, LAMA1, ARX, PAX6, VAX1, PRTG, SHH, DPYSL5, KIF5C, NKX2-1, NRCAM, OTX2	623	188	20094	2.40186	1	0.165955	0.162003
GOTERM_BP_DIRECT	GO:0060441~epithelial tube branching involved in lung morphogenesis	5	0.603136	0.0059013	SOX2, SHH, LAMA1, NKX2-1, FOXA2	623	24	20094	6.7195	1	0.165955	0.162003
GOTERM_BP_DIRECT	GO:0048839~inner ear development	8	0.965018	0.00631651	SOX2, SHH, ADGRV1, LHX3, H2-K1, PROX1, DLL1, FREM2	623	71	20094	3.63421	1	0.1761	0.171907
GOTERM_BP_DIRECT	GO:0007166~cell surface receptor signaling pathway	15	1.80941	0.00669073	ADCYAP1R1, ADGRV1, FZD5, LAMA1, FZD4, FZD8, CXCL13, CELSR2, TIRAP, CELSR3, CYSLTR1, ADGRG1, ERBB4, ADGRB1, CLEC1B	623	213	20094	2.27138	1	0.178824	0.174566
GOTERM_BP_DIRECT	GO:0035881~amacrine cell differentiation	4	0.482509	0.00669414	NEUROD4, BHLHE22, MIAT, IKZF1	623	13	20094	9.92419	1	0.178824	0.174566
GOTERM_BP_DIRECT	GO:0007406~negative regulation of neuroblast proliferation	4	0.482509	0.00669414	PAX6, PROX1, VAX1, VSX2	623	13	20094	9.92419	1	0.178824	0.174566
GOTERM_BP_DIRECT	GO:0048339~paraxial mesoderm development	4	0.482509	0.00669414	EPB41L5, ZIC2, ZIC3, DLL3	623	13	20094	9.92419	1	0.178824	0.174566
GOTERM_BP_DIRECT	GO:0033327~Leydig cell differentiation	4	0.482509	0.00669414	NR5A1, CCND1, NKX2-1, NR0B1	623	13	20094	9.92419	1	0.178824	0.174566
GOTERM_BP_DIRECT	GO:0001708~cell fate specification	6	0.723764	0.006746	SOX2, EOMES, SHH, OTX2, TBR1, FOXA2	623	39	20094	4.96209	1	0.178824	0.174566
GOTERM_BP_DIRECT	GO:0006520~cellular amino acid metabolic process	5	0.603136	0.00685615	PM20D1, GLDC, ASPG, CAD, GGT1	623	25	20094	6.45072	1	0.180267	0.175975
GOTERM_BP_DIRECT	GO:0009888~tissue development	6	0.723764	0.00751761	NR5A1, LAMA1, SALL4, FASN, DHCR24, DLL3	623	40	20094	4.83804	1	0.192952	0.188358
GOTERM_BP_DIRECT	GO:0045747~positive regulation of Notch signaling pathway	6	0.723764	0.00751761	SOX2, GSX2, KIT, ASCL1, DLL1, HES5	623	40	20094	4.83804	1	0.192952	0.188358
GOTERM_BP_DIRECT	GO:0045746~negative regulation of Notch signaling pathway	6	0.723764	0.00751761	MEG3, DLX1, DLX2, DLL1, DLK1, DLL3	623	40	20094	4.83804	1	0.192952	0.188358
GOTERM_BP_DIRECT	GO:0007498~mesoderm development	5	0.603136	0.0079078	EPB41L5, ZIC3, PALB2, POU4F1, ACVR2B	623	26	20094	6.20262	1	0.201369	0.196574
GOTERM_BP_DIRECT	GO:0035136~forelimb morphogenesis	4	0.482509	0.00832605	SALL1, SALL3, ZBTB16, RNF165	623	14	20094	9.21532	1	0.210363	0.205354
GOTERM_BP_DIRECT	GO:0001756~somitogenesis	7	0.844391	0.00888579	CRB2, EPB41L5, FOXC2, ATM, PALB2, DLL1, DLL3	623	58	20094	3.89268	1	0.218599	0.213394
GOTERM_BP_DIRECT	GO:0007409~axonogenesis	10	1.20627	0.00897447	NKX2-9, CNTNAP2, BRSK2, DAB1, METRN, PAX6, PAK3, VAX2, ISL1, RNF165	623	114	20094	2.82926	1	0.218599	0.213394
GOTERM_BP_DIRECT	GO:0034653~retinoic acid catabolic process	3	0.361882	0.00898999	CYP26A1, CYP26C1, CRABP1	623	5	20094	19.3522	1	0.218599	0.213394
GOTERM_BP_DIRECT	GO:0046545~development of primary female sexual characteristics	3	0.361882	0.00898999	ADCYAP1R1, DACH1, DACH2	623	5	20094	19.3522	1	0.218599	0.213394
GOTERM_BP_DIRECT	GO:0061205~paramesonephric duct development	3	0.361882	0.00898999	LHX1, GREB1L, PAX2	623	5	20094	19.3522	1	0.218599	0.213394
GOTERM_BP_DIRECT	GO:0001656~metanephros development	6	0.723764	0.00924105	FOXC2, SHH, FGF8, LHX1, GREB1L, PAX2	623	42	20094	4.60766	1	0.223026	0.217716
GOTERM_BP_DIRECT	GO:0030324~lung development	11	1.3269	0.00979887	NKX2-9, SHH, FGF8, MYCN, LHX3, ITGA3, ZIC3, NKX2-1, PROX1, ACVR2B, FOXA2	623	136	20094	2.60875	1	0.233883	0.228314
GOTERM_BP_DIRECT	GO:0042391~regulation of membrane potential	10	1.20627	0.0100025	RIMS2, KCNH2, CACNA1I, RIMS4, RIMS3, CHRNA7, CHRNA6, GRIK2, HTR3B, SLC4A4	623	116	20094	2.78048	1	0.233883	0.228314
GOTERM_BP_DIRECT	GO:0032525~somite rostral/caudal axis specification	4	0.482509	0.0101712	EPB41L5, LHX1, OTX2, FOXA2	623	15	20094	8.60096	1	0.233883	0.228314
GOTERM_BP_DIRECT	GO:0008406~gonad development	4	0.482509	0.0101712	FGF8, SALL1, HESX1, NR0B1	623	15	20094	8.60096	1	0.233883	0.228314
GOTERM_BP_DIRECT	GO:0070986~left/right axis specification	4	0.482509	0.0101712	EPB41L5, ZIC3, MNS1, DLL1	623	15	20094	8.60096	1	0.233883	0.228314
GOTERM_BP_DIRECT	GO:0043069~negative regulation of programmed cell death	4	0.482509	0.0101712	KIT, PLCG2, POU4F1, PAX2	623	15	20094	8.60096	1	0.233883	0.228314
GOTERM_BP_DIRECT	GO:0048468~cell development	6	0.723764	0.0101971	SHH, FOXE3, PLA2G3, GATA1, FOXA2, NKX2-2	623	43	20094	4.5005	1	0.233883	0.228314
GOTERM_BP_DIRECT	GO:0050678~regulation of epithelial cell proliferation	5	0.603136	0.0103163	UHRF1, ARX, PGR, HES5, NKX2-3	623	28	20094	5.75957	1	0.234951	0.229357
GOTERM_BP_DIRECT	GO:0051402~neuron apoptotic process	9	1.08565	0.011074	DLX1, FGF8, ATM, GRIK2, GAPDH, POU4F1, NES, CIT, HIPK2	623	98	20094	2.96207	1	0.250443	0.24448
GOTERM_BP_DIRECT	GO:0014059~regulation of dopamine secretion	5	0.603136	0.0116801	SYT2, SYT12, PRKCB, CHRNA6, SYT7	623	29	20094	5.56097	1	0.260159	0.253964
GOTERM_BP_DIRECT	GO:0001666~response to hypoxia	14	1.68878	0.0120567	PTGIS, PKLR, EPO, CHRNA7, VEGFD, MT3, HK2, HSPD1, HSD11B2, LDHA, TH, DNMT3B, ATM, SOX4	623	206	20094	2.19199	1	0.260159	0.253964
GOTERM_BP_DIRECT	GO:0098609~cell-cell adhesion	14	1.68878	0.0120567	ADGRV1, COL13A1, ITGA3, AQP4, CELSR2, CELSR3, VNN1, CDH20, IGDCC3, PKP2, NRCAM, JAM2, TJP2, MPZL2	623	206	20094	2.19199	1	0.260159	0.253964
GOTERM_BP_DIRECT	GO:0001701~in utero embryonic development	20	2.41255	0.0120967	ZFP568, MEG3, EMX1, CNTNAP2, D930028M14RIK, USP9X, CHD7, ENO1, PALB2, DLL1, GATA1, DLL3, KLF1, EPB41L5, GJB3, SALL4, HAND1, SPEG, APOB, FOXA2	623	347	20094	1.859	1	0.260159	0.253964
GOTERM_BP_DIRECT	GO:0001706~endoderm formation	4	0.482509	0.0122347	DUSP4, EOMES, DUSP5, LHX1	623	16	20094	8.0634	1	0.260159	0.253964
GOTERM_BP_DIRECT	GO:0035137~hindlimb morphogenesis	4	0.482509	0.0122347	SALL1, SALL3, ZBTB16, PITX1	623	16	20094	8.0634	1	0.260159	0.253964
GOTERM_BP_DIRECT	GO:0021846~cell proliferation in forebrain	4	0.482509	0.0122347	FGF8, FABP7, ARX, LHX5	623	16	20094	8.0634	1	0.260159	0.253964
GOTERM_BP_DIRECT	GO:0086010~membrane depolarization during action potential	4	0.482509	0.0122347	KCNH2, CACNA1I, SCN11A, SCN5A	623	16	20094	8.0634	1	0.260159	0.253964
GOTERM_BP_DIRECT	GO:0021854~hypothalamus development	4	0.482509	0.0122347	SOX3, GSX1, RAX, NKX2-1	623	16	20094	8.0634	1	0.260159	0.253964
GOTERM_BP_DIRECT	GO:0019228~neuronal action potential	6	0.723764	0.0123081	CACNA1I, CNTNAP2, SCN11A, CHRNA7, GRIK2, SCN5A	623	45	20094	4.30048	1	0.260159	0.253964
GOTERM_BP_DIRECT	GO:0016310~phosphorylation	31	3.73945	0.0125916	RET, DYRK3, BRSK2, AK4, PIK3C2A, TTBK1, HK2, RPS6KA6, NUAK2, ERBB4, CHEK2, RPS6KA2, SPEG, PIP5K1B, MAP3K9, CKB, PAK3, PLK3, PKLR, PRKCB, ACVR2B, MAPK12, HIPK2, CIT, MAP3K15, PKM, KIT, ATM, ALPK3, SIK2, BMPR1B	623	627	20094	1.59468	1	0.264424	0.258128
GOTERM_BP_DIRECT	GO:0048856~anatomical structure development	7	0.844391	0.013114	SHH, NR2F1, OTX2, PAX6, NR2E1, PAX5, PAX2	623	63	20094	3.58373	1	0.268681	0.262284
GOTERM_BP_DIRECT	GO:0030878~thyroid gland development	5	0.603136	0.0131543	SHH, FGF8, FOXE1, HESX1, NKX2-1	623	30	20094	5.3756	1	0.268681	0.262284
GOTERM_BP_DIRECT	GO:0014003~oligodendrocyte development	5	0.603136	0.0131543	SHH, MYRF, ASCL1, HES5, NKX2-2	623	30	20094	5.3756	1	0.268681	0.262284
GOTERM_BP_DIRECT	GO:0009880~embryonic pattern specification	5	0.603136	0.0131543	RIPPLY3, ZIC3, ERBB4, LHX1, ZBTB16	623	30	20094	5.3756	1	0.268681	0.262284
GOTERM_BP_DIRECT	GO:0010273~detoxification of copper ion	3	0.361882	0.0132097	MT2, MT1, MT3	623	6	20094	16.1268	1	0.268681	0.262284
GOTERM_BP_DIRECT	GO:0007595~lactation	6	0.723764	0.0134668	ATP7B, CCND1, ERBB4, CAD, CSN3, HK2	623	46	20094	4.20699	1	0.272198	0.265717
GOTERM_BP_DIRECT	GO:0019432~triglyceride biosynthetic process	4	0.482509	0.0145202	MOGAT2, PNPLA3, LPL, ACSL4	623	17	20094	7.58909	1	0.289866	0.282965
GOTERM_BP_DIRECT	GO:0048699~generation of neurons	4	0.482509	0.0145202	FGF8, GSX2, ASCL1, CIT	623	17	20094	7.58909	1	0.289866	0.282965
GOTERM_BP_DIRECT	GO:0001657~ureteric bud development	6	0.723764	0.0159999	RET, FOXC2, SALL1, LHX1, RARB, PAX2	623	48	20094	4.0317	1	0.317447	0.309888
GOTERM_BP_DIRECT	GO:2000179~positive regulation of neural precursor cell proliferation	5	0.603136	0.0164455	ADGRG1, NR2E1, PROX1, ASCL1, NES	623	32	20094	5.03963	1	0.324297	0.316575
GOTERM_BP_DIRECT	GO:0021895~cerebral cortex neuron differentiation	4	0.482509	0.0170306	EOMES, EMX1, NKX2-1, NR2E1	623	18	20094	7.16747	1	0.331789	0.323889
GOTERM_BP_DIRECT	GO:0040019~positive regulation of embryonic development	4	0.482509	0.0170306	MEG3, LHX1, OTX2, FOXA2	623	18	20094	7.16747	1	0.331789	0.323889
GOTERM_BP_DIRECT	GO:0001654~eye development	6	0.723764	0.0173777	SOX2, FOXE3, SIX6, BMPR1B, CHRDL1, FREM2	623	49	20094	3.94942	1	0.336524	0.328512
GOTERM_BP_DIRECT	GO:0010468~regulation of gene expression	24	2.89505	0.0177087	EOMES, FOXG1, CAVIN4, CHD7, NR2F1, PAX6, MITF, TBR1, PRDM12, PROX1, ASCL1, ISL1, DLK1, AFF2, SOX2, SHH, TRIM6, LHX1, NOVA2, IGF2BP1, PLCG2, DNMT3B, IGF2BP3, FOXA2	623	462	20094	1.67551	1	0.336729	0.328712
GOTERM_BP_DIRECT	GO:0061072~iris morphogenesis	3	0.361882	0.0181171	FOXE3, PAX6, HIPK2	623	7	20094	13.823	1	0.336729	0.328712
GOTERM_BP_DIRECT	GO:0021902~commitment of neuronal cell to specific neuron type in forebrain	3	0.361882	0.0181171	PAX6, TBR1, ASCL1	623	7	20094	13.823	1	0.336729	0.328712
GOTERM_BP_DIRECT	GO:0060059~embryonic retina morphogenesis in camera-type eye	3	0.361882	0.0181171	LHX1, PROX1, HIPK2	623	7	20094	13.823	1	0.336729	0.328712
GOTERM_BP_DIRECT	GO:0072177~mesonephric duct development	3	0.361882	0.0181171	LHX1, GREB1L, PAX2	623	7	20094	13.823	1	0.336729	0.328712
GOTERM_BP_DIRECT	GO:0043584~nose development	3	0.361882	0.0181171	ALDH1A3, CHD7, HESX1	623	7	20094	13.823	1	0.336729	0.328712
GOTERM_BP_DIRECT	GO:0060235~lens induction in camera-type eye	3	0.361882	0.0181171	SOX2, POU2F1, HIPK2	623	7	20094	13.823	1	0.336729	0.328712
GOTERM_BP_DIRECT	GO:0042475~odontogenesis of dentin-containing tooth	7	0.844391	0.0185815	DLX1, DLX2, SHH, HAND1, ACVR2B, DLL1, NKX2-3	623	68	20094	3.32022	1	0.341435	0.333305
GOTERM_BP_DIRECT	GO:0000082~G1/S transition of mitotic cell cycle	7	0.844391	0.0185815	TRIM71, PLK3, CCND1, CCNE1, RCC1, E2F5, USP29	623	68	20094	3.32022	1	0.341435	0.333305
GOTERM_BP_DIRECT	GO:0048484~enteric nervous system development	4	0.482509	0.0197677	RET, TLX2, ARX, ASCL1	623	19	20094	6.79023	1	0.35915	0.350599
GOTERM_BP_DIRECT	GO:0048596~embryonic camera-type eye morphogenesis	4	0.482509	0.0197677	FZD5, TH, PAX6, HIPK2	623	19	20094	6.79023	1	0.35915	0.350599
GOTERM_BP_DIRECT	GO:0015908~fatty acid transport	5	0.603136	0.0202097	FABP3, FABP7, CRABP1, ACSL4, ERFE	623	34	20094	4.74318	1	0.363846	0.355183
GOTERM_BP_DIRECT	GO:0001658~branching involved in ureteric bud morphogenesis	6	0.723764	0.0203637	SHH, FGF8, SALL1, LHX1, GREB1L, PAX2	623	51	20094	3.79454	1	0.363846	0.355183
GOTERM_BP_DIRECT	GO:0048706~embryonic skeletal system development	6	0.723764	0.0203637	DLX1, DLX2, SHH, UCMA, NKX3-2, DLK1	623	51	20094	3.79454	1	0.363846	0.355183
GOTERM_BP_DIRECT	GO:0071277~cellular response to calcium ion	8	0.965018	0.0215754	ADGRV1, SYT2, SYT12, PLCG2, DPEP1, SCN5A, ECT2, SYT7	623	90	20094	2.86699	1	0.383378	0.37425
GOTERM_BP_DIRECT	GO:0006468~protein phosphorylation	31	3.73945	0.0217108	RET, DYRK3, BRSK2, LAMA1, CSF2RB, TTBK1, RPS6KA6, NUAK2, CCND1, ERBB4, CHEK2, RPS6KA2, SPEG, MAP3K9, PAK3, PLK3, PRKCB, HUS1, PAX6, ACVR2B, MAPK12, HIPK2, CIT, MAP3K15, CCNE1, KIT, TAF4B, ATM, ALPK3, SIK2, BMPR1B	623	655	20094	1.52651	1	0.383675	0.37454
GOTERM_BP_DIRECT	GO:0031290~retinal ganglion cell axon guidance	4	0.482509	0.0227325	ZIC2, NRCAM, BMPR1B, ISL1	623	20	20094	6.45072	1	0.399548	0.390035
GOTERM_BP_DIRECT	GO:2000543~positive regulation of gastrulation	3	0.361882	0.0236657	LHX1, OTX2, FOXA2	623	8	20094	12.0951	1	0.413703	0.403853
GOTERM_BP_DIRECT	GO:0007605~sensory perception of sound	16	1.93004	0.0238003	SRRM4, MCOLN3, ADGRV1, FZD4, CHD7, LHFPL4, AQP4, LRP2, ESPN, SOX2, MIR124-2HG, TH, MYO1A, EPS8L2, MIR124A-1HG, CRYM	623	274	20094	1.88342	1	0.413819	0.403966
GOTERM_BP_DIRECT	GO:0031122~cytoplasmic microtubule organization	6	0.723764	0.0254397	CEP126, PLK3, HOOK1, CCDC88C, FIGNL2, FIGN	623	54	20094	3.58373	1	0.438963	0.428511
GOTERM_BP_DIRECT	GO:0060307~regulation of ventricular cardiac muscle cell membrane repolarization	4	0.482509	0.0259251	KCNH2, NOS1AP, SCN5A, SCN4B	623	21	20094	6.14355	1	0.438963	0.428511
GOTERM_BP_DIRECT	GO:0022010~central nervous system myelination	4	0.482509	0.0259251	CNTNAP2, NKX6-2, MYRF, HES5	623	21	20094	6.14355	1	0.438963	0.428511
GOTERM_BP_DIRECT	GO:0042462~eye photoreceptor cell development	4	0.482509	0.0259251	CRB1, MFRP, TH, PAX6	623	21	20094	6.14355	1	0.438963	0.428511
GOTERM_BP_DIRECT	GO:0051090~regulation of sequence-specific DNA binding transcription factor activity	4	0.482509	0.0259251	FANCD2, ZIC3, FANCA, POU4F1	623	21	20094	6.14355	1	0.438963	0.428511
GOTERM_BP_DIRECT	GO:0007154~cell communication	5	0.603136	0.0267771	ADGRV1, GJB3, GJB5, DLL1, FREM2	623	37	20094	4.3586	1	0.451026	0.440287
GOTERM_BP_DIRECT	GO:0045766~positive regulation of angiogenesis	11	1.3269	0.0284576	CYSLTR1, PTGIS, PRKCB, CHRNA7, AGO2, ITGB8, VEGFD, NR2E1, ISL1, HK2, HIPK2	623	161	20094	2.20366	1	0.474924	0.463616
GOTERM_BP_DIRECT	GO:0007626~locomotory behavior	9	1.08565	0.0290345	CNTNAP2, ALDH1A3, MCOLN3, TH, CHD7, NKX2-1, FIGN, ESPN, ETV5	623	117	20094	2.48105	1	0.474924	0.463616
GOTERM_BP_DIRECT	GO:0001890~placenta development	6	0.723764	0.0292362	RTL1, LHX3, GJB3, PEG10, LHX4, LLGL2	623	56	20094	3.45574	1	0.474924	0.463616
GOTERM_BP_DIRECT	GO:0017158~regulation of calcium ion-dependent exocytosis	4	0.482509	0.029345	SYT2, DOC2A, SYT12, SYT7	623	22	20094	5.86429	1	0.474924	0.463616
GOTERM_BP_DIRECT	GO:0060324~face development	4	0.482509	0.029345	SOX3, ALDH1A3, ZIC3, CHD7	623	22	20094	5.86429	1	0.474924	0.463616
GOTERM_BP_DIRECT	GO:0006629~lipid metabolic process	33	3.9807	0.0296055	MOGAT2, PLA2G3, LPL, PIK3C2A, PLCXD2, MTMR7, HSD11B2, FUT9, AWAT2, FADS6, PLCG2, ST8SIA6, PIP5K1B, APOB, LBR, FDPS, PTPRN2, PTGIS, PLA2G4C, DHCR24, ACSL4, PM20D1, CYP27A1, ALDH1A3, CYP26A1, FASN, ALDH1A1, ASPG, PNPLA3, DPEP1, ACSBG1, PLCH1, BCAT1	623	728	20094	1.46205	1	0.474924	0.463616
GOTERM_BP_DIRECT	GO:0003310~pancreatic A cell differentiation	3	0.361882	0.0298112	NKX6-2, PAX6, NKX6-1	623	9	20094	10.7512	1	0.474924	0.463616
GOTERM_BP_DIRECT	GO:0048664~neuron fate determination	3	0.361882	0.0298112	FOXG1, OTX2, PROX1	623	9	20094	10.7512	1	0.474924	0.463616
GOTERM_BP_DIRECT	GO:0098976~excitatory chemical synaptic transmission	3	0.361882	0.0298112	CNTNAP2, PTCHD1, CHRDL1	623	9	20094	10.7512	1	0.474924	0.463616
GOTERM_BP_DIRECT	GO:0015670~carbon dioxide transport	3	0.361882	0.0298112	CAR14, AQP4, CAR4	623	9	20094	10.7512	1	0.474924	0.463616
GOTERM_BP_DIRECT	GO:0060040~retinal bipolar neuron differentiation	3	0.361882	0.0298112	BHLHE22, IKZF1, VSX2	623	9	20094	10.7512	1	0.474924	0.463616
GOTERM_BP_DIRECT	GO:2000300~regulation of synaptic vesicle exocytosis	7	0.844391	0.0302569	RIMS2, RIMS4, RIMS3, PRKCB, CHRNA7, CHRNA6, NRXN3	623	76	20094	2.97073	1	0.476271	0.464932
GOTERM_BP_DIRECT	GO:0019827~stem cell population maintenance	7	0.844391	0.0302569	SOX2, EOMES, LIN28A, ZIC3, SALL4, HESX1, MIAT	623	76	20094	2.97073	1	0.476271	0.464932
GOTERM_BP_DIRECT	GO:0032355~response to estradiol	9	1.08565	0.0303376	ADCYAP1R1, CCND1, TH, DNMT3B, WFDC1, APOB, GGT1, SLC6A1, RGS9	623	118	20094	2.46002	1	0.476271	0.464932
GOTERM_BP_DIRECT	GO:0086091~regulation of heart rate by cardiac conduction	5	0.603136	0.0317859	KCNH2, PKP2, SCN5A, ISL1, SCN4B	623	39	20094	4.13508	1	0.49421	0.482443
GOTERM_BP_DIRECT	GO:0030032~lamellipodium assembly	5	0.603136	0.0317859	FGD4, SPATA13, KIT, PARVB, VAV2	623	39	20094	4.13508	1	0.49421	0.482443
GOTERM_BP_DIRECT	GO:0007049~cell cycle	30	3.61882	0.0328374	DYRK3, BRSK2, RGS14, UHRF1, FOXG1, FIGN, NR2E1, IKZF1, ING4, PARD6B, CCND1, ZIC3, CHEK2, ZIC1, RCC1, ECT2, FANCI, LMLN, RBM38, HELLS, PLK3, USP9X, USP44, MAPK12, CIT, PTP4A1, FANCD2, CCNE1, ATM, LLGL2	623	652	20094	1.48406	1	0.506725	0.49466
GOTERM_BP_DIRECT	GO:0010629~negative regulation of gene expression	20	2.41255	0.0329042	POU2F1, GATA5, PAWR, WNT8B, PLA2G3, MYT1, POU3F2, POU4F1, TTBK1, AFF2, MIR124-2HG, SHH, TRIM6, FGF15, MYCN, MIR186, STC2, ITGB8, PGR, MIR124A-1HG	623	387	20094	1.66685	1	0.506725	0.49466
GOTERM_BP_DIRECT	GO:0016055~Wnt signaling pathway	14	1.68878	0.0334648	FZD5, FZD4, FZD8, WNT8B, MITF, CPZ, VAX2, CELSR2, TMEM198, SOX2, CCND1, CCNE1, CCDC88C, HESX1	623	237	20094	1.90528	1	0.512916	0.500703
GOTERM_BP_DIRECT	GO:0043524~negative regulation of neuron apoptotic process	12	1.44753	0.0336408	DLX1, FGF8, CCND1, PLA2G3, MT1, GRIK2, POU4F1, MT3, ISL1, NES, HSPD1, HIPK2	623	189	20094	2.04785	1	0.51318	0.500962
GOTERM_BP_DIRECT	GO:0048701~embryonic cranial skeleton morphogenesis	5	0.603136	0.0344824	FOXC2, DLX2, DLX1AS, ALX3, PAX5	623	40	20094	4.0317	1	0.523549	0.511084
GOTERM_BP_DIRECT	GO:0007155~cell adhesion	28	3.37756	0.0350318	RET, CNTNAP2, COL13A1, LAMA1, NCAN, NRXN3, CELSR2, HAPLN1, CELSR3, PRTG, VTN, ADGRG1, IBSP, PODXL, CDH20, ITGB8, NRCAM, HES5, MPZL2, LMLN, ITGA3, MYBPH, PARVB, CLDN6, CLDN10, DAB1, JAML, FREM2	623	602	20094	1.50017	1	0.529405	0.516801
GOTERM_BP_DIRECT	GO:0006865~amino acid transport	6	0.723764	0.0355697	SLC38A1, SLC6A15, SLC1A5, SLC38A8, SLC38A3, SLC7A1	623	59	20094	3.28003	1	0.529813	0.517199
GOTERM_BP_DIRECT	GO:0006887~exocytosis	9	1.08565	0.0359507	RIMS2, RIMS4, BRSK2, RIMS3, DOC2A, PIK3C2A, SYT7, CPLX3, LLGL2	623	122	20094	2.37936	1	0.529813	0.517199
GOTERM_BP_DIRECT	GO:0048703~embryonic viscerocranium morphogenesis	3	0.361882	0.0365115	FOXC2, MTHFD1L, LHX1	623	10	20094	9.67608	1	0.529813	0.517199
GOTERM_BP_DIRECT	GO:1902667~regulation of axon guidance	3	0.361882	0.0365115	NOVA2, TBR1, ZSWIM5	623	10	20094	9.67608	1	0.529813	0.517199
GOTERM_BP_DIRECT	GO:0061101~neuroendocrine cell differentiation	3	0.361882	0.0365115	ASCL1, POU3F2, NKX2-2	623	10	20094	9.67608	1	0.529813	0.517199
GOTERM_BP_DIRECT	GO:0060019~radial glial cell differentiation	3	0.361882	0.0365115	EMX1, METRN, MIAT	623	10	20094	9.67608	1	0.529813	0.517199
GOTERM_BP_DIRECT	GO:0051252~regulation of RNA metabolic process	3	0.361882	0.0365115	NOVA2, IGF2BP1, IGF2BP3	623	10	20094	9.67608	1	0.529813	0.517199
GOTERM_BP_DIRECT	GO:0034765~regulation of ion transmembrane transport	10	1.20627	0.0366475	CLIC6, KCNH2, CACNA1I, KCNJ12, SCN11A, KCNC3, KCNA3, SCN5A, SCN4B, CLCN1	623	145	20094	2.22439	1	0.529813	0.517199
GOTERM_BP_DIRECT	GO:0071280~cellular response to copper ion	4	0.482509	0.0368608	ATP7B, MT2, MT1, MT3	623	24	20094	5.3756	1	0.529813	0.517199
GOTERM_BP_DIRECT	GO:0044772~mitotic cell cycle phase transition	4	0.482509	0.0368608	CCNJ, CCND1, CCNE1, CCNJL	623	24	20094	5.3756	1	0.529813	0.517199
GOTERM_BP_DIRECT	GO:0021954~central nervous system neuron development	4	0.482509	0.0368608	FGF8, FOXG1, NOVA2, ASCL1	623	24	20094	5.3756	1	0.529813	0.517199
GOTERM_BP_DIRECT	GO:0007492~endoderm development	5	0.603136	0.0373077	EOMES, EPB41L5, LHX1, NKX2-1, OTX2	623	41	20094	3.93337	1	0.533863	0.521152
GOTERM_BP_DIRECT	GO:0060021~palate development	7	0.844391	0.0395589	SHH, FOXE1, WFIKKN1, SCHIP1, CHD7, VAX1, ACVR2B	623	81	20094	2.78735	1	0.563583	0.550164
GOTERM_BP_DIRECT	GO:0006807~nitrogen compound metabolic process	4	0.482509	0.0409524	PM20D1, VNN1, SCHIP1, CAD	623	25	20094	5.16058	1	0.573333	0.559683
GOTERM_BP_DIRECT	GO:0006882~cellular zinc ion homeostasis	4	0.482509	0.0409524	ATP7B, MT2, MT1, MT3	623	25	20094	5.16058	1	0.573333	0.559683
GOTERM_BP_DIRECT	GO:0035567~non-canonical Wnt signaling pathway	4	0.482509	0.0409524	FZD5, FZD4, CCDC88C, FZD8	623	25	20094	5.16058	1	0.573333	0.559683
GOTERM_BP_DIRECT	GO:0046928~regulation of neurotransmitter secretion	4	0.482509	0.0409524	MCTP1, SYT12, KCNC3, CPLX3	623	25	20094	5.16058	1	0.573333	0.559683
GOTERM_BP_DIRECT	GO:0012501~programmed cell death	5	0.603136	0.0433456	PKM, KIT, PLCG2, RARB, EDA2R	623	43	20094	3.75042	1	0.594166	0.580019
GOTERM_BP_DIRECT	GO:0001553~luteinization	3	0.361882	0.0437265	NR5A1, FZD4, SCHIP1	623	11	20094	8.79644	1	0.594166	0.580019
GOTERM_BP_DIRECT	GO:0016125~sterol metabolic process	3	0.361882	0.0437265	CYP26A1, CYP26C1, DHCR24	623	11	20094	8.79644	1	0.594166	0.580019
GOTERM_BP_DIRECT	GO:0019363~pyridine nucleotide biosynthetic process	3	0.361882	0.0437265	KYNU, NAMPT, QPRT	623	11	20094	8.79644	1	0.594166	0.580019
GOTERM_BP_DIRECT	GO:0048617~embryonic foregut morphogenesis	3	0.361882	0.0437265	EPB41L5, SHH, ACVR2B	623	11	20094	8.79644	1	0.594166	0.580019
GOTERM_BP_DIRECT	GO:0048853~forebrain morphogenesis	3	0.361882	0.0437265	FGF8, GSX2, HESX1	623	11	20094	8.79644	1	0.594166	0.580019
GOTERM_BP_DIRECT	GO:0003139~secondary heart field specification	3	0.361882	0.0437265	FOXH1, LRP2, ISL1	623	11	20094	8.79644	1	0.594166	0.580019
GOTERM_BP_DIRECT	GO:0050770~regulation of axonogenesis	4	0.482509	0.0452626	RET, BRSK2, PAK3, POU3F2	623	26	20094	4.96209	1	0.607382	0.592921
GOTERM_BP_DIRECT	GO:0007009~plasma membrane organization	4	0.482509	0.0452626	SPTA1, CRB1, BAIAP2L1, SPTB	623	26	20094	4.96209	1	0.607382	0.592921
GOTERM_BP_DIRECT	GO:0014032~neural crest cell development	4	0.482509	0.0452626	CYP26A1, FOXC2, CYP26C1, KBTBD8	623	26	20094	4.96209	1	0.607382	0.592921
GOTERM_BP_DIRECT	GO:0010975~regulation of neuron projection development	5	0.603136	0.0465583	BRSK2, NRCAM, PAX6, TBR1, PAK3	623	44	20094	3.66518	1	0.622188	0.607374
GOTERM_BP_DIRECT	GO:0008285~negative regulation of cell proliferation	21	2.53317	0.0477818	MEG3, RBM38, FZD5, ZBTB16, HMGA1, DHCR24, PAX6, HMGA1B, PROX1, DLL1, GATA1, MYO16, ING4, ADGRG1, RIPPLY3, ERBB4, RPS6KA2, PKP2, RARB, SOX4, VSX2	623	431	20094	1.57152	1	0.634546	0.619438
GOTERM_BP_DIRECT	GO:0030218~erythrocyte differentiation	6	0.723764	0.0478755	DYRK3, EPO, KIT, IKZF1, GATA1, KLF1	623	64	20094	3.02378	1	0.634546	0.619438
GOTERM_BP_DIRECT	GO:0007368~determination of left/right symmetry	7	0.844391	0.0481773	SHH, FGF8, ZIC3, FOXH1, ACVR2B, DLL1, NKX3-2	623	85	20094	2.65618	1	0.63594	0.620798
GOTERM_BP_DIRECT	GO:0032735~positive regulation of interleukin-12 production	5	0.603136	0.0498998	PLCG2, IRF8, ISL1, TIRAP, HSPD1	623	45	20094	3.58373	1	0.653344	0.637788
GOTERM_BP_DIRECT	GO:0048469~cell maturation	5	0.603136	0.0498998	FZD5, PLA2G3, ASCL1, POU2F2, HES5	623	45	20094	3.58373	1	0.653344	0.637788
GOTERM_BP_DIRECT	GO:0021549~cerebellum development	6	0.723764	0.0506031	CNTNAP2, LHX1, LHX5, CKB, GART, MYO16	623	65	20094	2.97726	1	0.654667	0.63908
GOTERM_BP_DIRECT	GO:0009435~NAD biosynthetic process	3	0.361882	0.0514179	KYNU, NAMPT, QPRT	623	12	20094	8.0634	1	0.654667	0.63908
GOTERM_BP_DIRECT	GO:0001823~mesonephros development	3	0.361882	0.0514179	LHX1, ZBTB16, PAX2	623	12	20094	8.0634	1	0.654667	0.63908
GOTERM_BP_DIRECT	GO:0045926~negative regulation of growth	3	0.361882	0.0514179	ING4, MT2, MT1	623	12	20094	8.0634	1	0.654667	0.63908
GOTERM_BP_DIRECT	GO:0010586~miRNA metabolic process	3	0.361882	0.0514179	TRIM71, LIN28A, AGO2	623	12	20094	8.0634	1	0.654667	0.63908
GOTERM_BP_DIRECT	GO:0045588~positive regulation of gamma-delta T cell differentiation	3	0.361882	0.0514179	SOX13, NCKAP1L, SOX4	623	12	20094	8.0634	1	0.654667	0.63908
GOTERM_BP_DIRECT	GO:0072006~nephron development	3	0.361882	0.0514179	ITGA3, DLL1, NUP160	623	12	20094	8.0634	1	0.654667	0.63908
GOTERM_BP_DIRECT	GO:0007628~adult walking behavior	5	0.603136	0.0569671	DAB1, GBX1, CHD7, ZIC1, HIPK2	623	47	20094	3.43124	1	0.722476	0.705275
GOTERM_BP_DIRECT	GO:0018105~peptidyl-serine phosphorylation	11	1.3269	0.0589128	DYRK3, BRSK2, RPS6KA6, EPO, PRKCB, RPS6KA2, CHEK2, ATM, MAPK12, TTBK1, HIPK2	623	183	20094	1.93874	1	0.72738	0.710061
GOTERM_BP_DIRECT	GO:0071300~cellular response to retinoic acid	6	0.723764	0.0593221	RET, CYP26A1, GJB3, ATP1A3, ATM, PAX2	623	68	20094	2.84591	1	0.72738	0.710061
GOTERM_BP_DIRECT	GO:2000378~negative regulation of reactive oxygen species metabolic process	4	0.482509	0.059468	MYCN, MT3, PAX2, HK2	623	29	20094	4.44877	1	0.72738	0.710061
GOTERM_BP_DIRECT	GO:0010744~positive regulation of macrophage derived foam cell differentiation	3	0.361882	0.0595495	PLA2G3, LPL, APOB	623	13	20094	7.44314	1	0.72738	0.710061
GOTERM_BP_DIRECT	GO:0006779~porphyrin-containing compound biosynthetic process	3	0.361882	0.0595495	SPTA1, SPTB, ANK1	623	13	20094	7.44314	1	0.72738	0.710061
GOTERM_BP_DIRECT	GO:0050673~epithelial cell proliferation	7	0.844391	0.0604617	NKX2-9, SHH, FOXE3, MYCN, DACH1, FABP7, KIT	623	90	20094	2.50861	1	0.72738	0.710061
GOTERM_BP_DIRECT	GO:0001974~blood vessel remodeling	5	0.603136	0.0606913	CRB1, FOXC2, FGF8, CHD7, ACVR2B	623	48	20094	3.35975	1	0.72738	0.710061
GOTERM_BP_DIRECT	GO:0038162~erythropoietin-mediated signaling pathway	2	0.241255	0.0609523	EPO, KIT	623	2	20094	32.2536	1	0.72738	0.710061
GOTERM_BP_DIRECT	GO:0060163~subpallium neuron fate commitment	2	0.241255	0.0609523	GSX2, ASCL1	623	2	20094	32.2536	1	0.72738	0.710061
GOTERM_BP_DIRECT	GO:0048880~sensory system development	2	0.241255	0.0609523	POU4F1, ISL1	623	2	20094	32.2536	1	0.72738	0.710061
GOTERM_BP_DIRECT	GO:0021526~medial motor column neuron differentiation	2	0.241255	0.0609523	LHX3, LHX4	623	2	20094	32.2536	1	0.72738	0.710061
GOTERM_BP_DIRECT	GO:0021937~cerebellar Purkinje cell-granule cell precursor cell signaling involved in regulation of granule cell precursor cell proliferation	2	0.241255	0.0609523	LHX1, LHX5	623	2	20094	32.2536	1	0.72738	0.710061
GOTERM_BP_DIRECT	GO:0001705~ectoderm formation	2	0.241255	0.0609523	LHX1, FOXA2	623	2	20094	32.2536	1	0.72738	0.710061
GOTERM_BP_DIRECT	GO:0021893~cerebral cortex GABAergic interneuron fate commitment	2	0.241255	0.0609523	DLX1, DLX2	623	2	20094	32.2536	1	0.72738	0.710061
GOTERM_BP_DIRECT	GO:0006546~glycine catabolic process	2	0.241255	0.0609523	GLDC, AMT	623	2	20094	32.2536	1	0.72738	0.710061
GOTERM_BP_DIRECT	GO:0035283~central nervous system segmentation	2	0.241255	0.0609523	ZIC2, ZIC3	623	2	20094	32.2536	1	0.72738	0.710061
GOTERM_BP_DIRECT	GO:0008306~associative learning	5	0.603136	0.0645414	CNTNAP2, CHRNA7, NPTX2, RIN1, SLC6A1	623	49	20094	3.29118	1	0.767379	0.749108
GOTERM_BP_DIRECT	GO:0051216~cartilage development	7	0.844391	0.0658504	DLX2, ZBTB16, ITGB8, BMPR1B, PITX1, HES5, MATN3	623	92	20094	2.45408	1	0.780074	0.761501
GOTERM_BP_DIRECT	GO:0001946~lymphangiogenesis	3	0.361882	0.0680867	FOXC2, PROX1, ACVR2B	623	14	20094	6.91149	1	0.786402	0.767678
GOTERM_BP_DIRECT	GO:0031054~pre-miRNA processing	3	0.361882	0.0680867	LIN28B, LIN28A, AGO2	623	14	20094	6.91149	1	0.786402	0.767678
GOTERM_BP_DIRECT	GO:2000177~regulation of neural precursor cell proliferation	3	0.361882	0.0680867	TRIM71, SALL1, FOXG1	623	14	20094	6.91149	1	0.786402	0.767678
GOTERM_BP_DIRECT	GO:0015804~neutral amino acid transport	3	0.361882	0.0680867	SLC38A1, SLC6A15, SLC38A5	623	14	20094	6.91149	1	0.786402	0.767678
GOTERM_BP_DIRECT	GO:0086002~cardiac muscle cell action potential involved in contraction	3	0.361882	0.0680867	PKP2, SCN5A, SCN4B	623	14	20094	6.91149	1	0.786402	0.767678
GOTERM_BP_DIRECT	GO:0003215~cardiac right ventricle morphogenesis	3	0.361882	0.0680867	FOXH1, ISL1, SOX4	623	14	20094	6.91149	1	0.786402	0.767678
GOTERM_BP_DIRECT	GO:0003309~type B pancreatic cell differentiation	3	0.361882	0.0680867	PAX6, NKX6-1, NKX2-2	623	14	20094	6.91149	1	0.786402	0.767678
GOTERM_BP_DIRECT	GO:0060173~limb development	5	0.603136	0.0685162	SHH, SALL1, CHD7, RAX, RNF165	623	50	20094	3.22536	1	0.788546	0.769771
GOTERM_BP_DIRECT	GO:0003007~heart morphogenesis	6	0.723764	0.0721935	FOXC2, FGF8, EPO, CHD7, HAND1, ISL1	623	72	20094	2.6878	1	0.827922	0.808209
GOTERM_BP_DIRECT	GO:0007179~transforming growth factor beta receptor signaling pathway	7	0.844391	0.0744429	MSTN, ONECUT2, USP9X, FOXH1, ITGB8, BMPR1B, HIPK2	623	95	20094	2.37658	1	0.8507	0.830446
GOTERM_BP_DIRECT	GO:0008585~female gonad development	4	0.482509	0.0754932	NR5A1, SCHIP1, FANCA, ATM	623	32	20094	4.0317	1	0.852766	0.832462
GOTERM_BP_DIRECT	GO:0030858~positive regulation of epithelial cell differentiation	3	0.361882	0.0769968	SOX2, PAX6, NKX2-2	623	15	20094	6.45072	1	0.852766	0.832462
GOTERM_BP_DIRECT	GO:0043586~tongue development	3	0.361882	0.0769968	SOX2, SHH, KIT	623	15	20094	6.45072	1	0.852766	0.832462
GOTERM_BP_DIRECT	GO:0021953~central nervous system neuron differentiation	3	0.361882	0.0769968	NKX6-1, BMPR1B, POU4F1	623	15	20094	6.45072	1	0.852766	0.832462
GOTERM_BP_DIRECT	GO:0000188~inactivation of MAPK activity	3	0.361882	0.0769968	DUSP4, DUSP5, DUSP9	623	15	20094	6.45072	1	0.852766	0.832462
GOTERM_BP_DIRECT	GO:0031076~embryonic camera-type eye development	3	0.361882	0.0769968	ALDH1A3, FZD5, NES	623	15	20094	6.45072	1	0.852766	0.832462
GOTERM_BP_DIRECT	GO:0021819~layer formation in cerebral cortex	3	0.361882	0.0769968	ADGRG1, NR2E1, LRP8	623	15	20094	6.45072	1	0.852766	0.832462
GOTERM_BP_DIRECT	GO:0060445~branching involved in salivary gland morphogenesis	3	0.361882	0.0769968	SHH, FGF8, LAMA1	623	15	20094	6.45072	1	0.852766	0.832462
GOTERM_BP_DIRECT	GO:0030705~cytoskeleton-dependent intracellular transport	3	0.361882	0.0769968	HOOK1, KIF5C, CCDC88C	623	15	20094	6.45072	1	0.852766	0.832462
GOTERM_BP_DIRECT	GO:0065003~macromolecular complex assembly	8	0.965018	0.0792891	RIC3, PARD6B, NUP210, GLDC, OTX2, MITF, NCKAP1L, HES5	623	120	20094	2.15024	1	0.875156	0.854319
GOTERM_BP_DIRECT	GO:0050900~leukocyte migration	4	0.482509	0.0812157	JAML, ITGA3, PODXL, NKX2-3	623	33	20094	3.90953	1	0.884349	0.863293
GOTERM_BP_DIRECT	GO:0006284~base-excision repair	4	0.482509	0.0812157	POLQ, HMGA1, DNA2, HMGA1B	623	33	20094	3.90953	1	0.884349	0.863293
GOTERM_BP_DIRECT	GO:0007269~neurotransmitter secretion	4	0.482509	0.0812157	RIMS2, SYT2, PTPRN2, NRXN3	623	33	20094	3.90953	1	0.884349	0.863293
GOTERM_BP_DIRECT	GO:0035265~organ growth	4	0.482509	0.0812157	FGF8, ARX, ACVR2B, DLL1	623	33	20094	3.90953	1	0.884349	0.863293
GOTERM_BP_DIRECT	GO:0043066~negative regulation of apoptotic process	28	3.37756	0.0837882	FOXE3, DYRK3, TFRC, EPO, LRP2, NR2E1, ASCL1, GATA1, HSPD1, SHH, NUAK2, FGF8, ERBB4, NCKAP1L, NKX3-2, HELLS, PLK3, DHCR24, MITF, MT3, PALB2, POU4F1, PAX2, KRT18, LHX3, DPEP1, PGR, LHX4	623	657	20094	1.37458	1	0.889436	0.868259
GOTERM_BP_DIRECT	GO:0030334~regulation of cell migration	8	0.965018	0.0848456	FRMD5, FGF15, FGF8, LAMA1, ERBB4, SPATA13, GSX2, PAX6	623	122	20094	2.11499	1	0.889436	0.868259
GOTERM_BP_DIRECT	GO:0071294~cellular response to zinc ion	3	0.361882	0.0862485	MT2, MT1, MT3	623	16	20094	6.04755	1	0.889436	0.868259
GOTERM_BP_DIRECT	GO:0007263~nitric oxide mediated signal transduction	3	0.361882	0.0862485	GUCY1A2, MT2, MT1	623	16	20094	6.04755	1	0.889436	0.868259
GOTERM_BP_DIRECT	GO:0043652~engulfment of apoptotic cell	3	0.361882	0.0862485	XKR7, ADGRB1, XKR5	623	16	20094	6.04755	1	0.889436	0.868259
GOTERM_BP_DIRECT	GO:0031573~intra-S DNA damage checkpoint	3	0.361882	0.0862485	FANCD2, CHEK2, HUS1	623	16	20094	6.04755	1	0.889436	0.868259
GOTERM_BP_DIRECT	GO:0021889~olfactory bulb interneuron differentiation	3	0.361882	0.0862485	SALL1, ERBB4, GSX2	623	16	20094	6.04755	1	0.889436	0.868259
GOTERM_BP_DIRECT	GO:0097028~dendritic cell differentiation	3	0.361882	0.0862485	ZBTB46, IRF8, GATA1	623	16	20094	6.04755	1	0.889436	0.868259
GOTERM_BP_DIRECT	GO:0002064~epithelial cell development	3	0.361882	0.0862485	ONECUT2, SHROOM3, PAX6	623	16	20094	6.04755	1	0.889436	0.868259
GOTERM_BP_DIRECT	GO:0072089~stem cell proliferation	6	0.723764	0.0864678	TRIM71, SHH, FGF8, RARB, NR2E1, NES	623	76	20094	2.54634	1	0.889436	0.868259
GOTERM_BP_DIRECT	GO:0051028~mRNA transport	7	0.844391	0.0868437	NUP210, KIF5C, PEG10, RANBP17, IGF2BP1, IGF2BP3, NUP160	623	99	20094	2.28056	1	0.889436	0.868259
GOTERM_BP_DIRECT	GO:1903037~regulation of leukocyte cell-cell adhesion	2	0.241255	0.090023	FUT9, FUT4	623	3	20094	21.5024	1	0.889436	0.868259
GOTERM_BP_DIRECT	GO:0060562~epithelial tube morphogenesis	2	0.241255	0.090023	MEG3, GREB1L	623	3	20094	21.5024	1	0.889436	0.868259
GOTERM_BP_DIRECT	GO:0097477~lateral motor column neuron migration	2	0.241255	0.090023	DAB1, LHX1	623	3	20094	21.5024	1	0.889436	0.868259
GOTERM_BP_DIRECT	GO:0006610~ribosomal protein import into nucleus	2	0.241255	0.090023	IPO11, IPO5	623	3	20094	21.5024	1	0.889436	0.868259
GOTERM_BP_DIRECT	GO:0072300~positive regulation of metanephric glomerulus development	2	0.241255	0.090023	RET, PAX2	623	3	20094	21.5024	1	0.889436	0.868259
GOTERM_BP_DIRECT	GO:0021778~oligodendrocyte cell fate specification	2	0.241255	0.090023	PAX6, OLIG2	623	3	20094	21.5024	1	0.889436	0.868259
GOTERM_BP_DIRECT	GO:0048852~diencephalon morphogenesis	2	0.241255	0.090023	SOX2, OTX2	623	3	20094	21.5024	1	0.889436	0.868259
GOTERM_BP_DIRECT	GO:0002273~plasmacytoid dendritic cell differentiation	2	0.241255	0.090023	ZBTB46, IRF8	623	3	20094	21.5024	1	0.889436	0.868259
GOTERM_BP_DIRECT	GO:0002316~follicular B cell differentiation	2	0.241255	0.090023	PLCG2, IRF8	623	3	20094	21.5024	1	0.889436	0.868259
GOTERM_BP_DIRECT	GO:2000348~regulation of CD40 signaling pathway	2	0.241255	0.090023	FANCD2, FANCA	623	3	20094	21.5024	1	0.889436	0.868259
GOTERM_BP_DIRECT	GO:0021986~habenula development	2	0.241255	0.090023	PAX6, POU4F1	623	3	20094	21.5024	1	0.889436	0.868259
GOTERM_BP_DIRECT	GO:0021553~olfactory nerve development	2	0.241255	0.090023	SALL1, CHD7	623	3	20094	21.5024	1	0.889436	0.868259
GOTERM_BP_DIRECT	GO:0061146~Peyer's patch morphogenesis	2	0.241255	0.090023	RET, FOXL1	623	3	20094	21.5024	1	0.889436	0.868259
GOTERM_BP_DIRECT	GO:0001840~neural plate development	2	0.241255	0.090023	ZIC2, ZIC3	623	3	20094	21.5024	1	0.889436	0.868259
GOTERM_BP_DIRECT	GO:0019464~glycine decarboxylation via glycine cleavage system	2	0.241255	0.090023	GLDC, AMT	623	3	20094	21.5024	1	0.889436	0.868259
GOTERM_BP_DIRECT	GO:0060166~olfactory pit development	2	0.241255	0.090023	ALDH1A3, ASCL1	623	3	20094	21.5024	1	0.889436	0.868259
GOTERM_BP_DIRECT	GO:0021543~pallium development	2	0.241255	0.090023	FGF8, PAX6	623	3	20094	21.5024	1	0.889436	0.868259
GOTERM_BP_DIRECT	GO:0070858~negative regulation of bile acid biosynthetic process	2	0.241255	0.090023	FGF15, PROX1	623	3	20094	21.5024	1	0.889436	0.868259
GOTERM_BP_DIRECT	GO:0042307~positive regulation of protein import into nucleus	5	0.603136	0.0902087	SHH, HSP90AA1, ZIC1, ECT2, IPO5	623	55	20094	2.93215	1	0.889436	0.868259
GOTERM_BP_DIRECT	GO:0021915~neural tube development	5	0.603136	0.0902087	TRIM71, CECR2, SALL1, SALL4, HES5	623	55	20094	2.93215	1	0.889436	0.868259
GOTERM_BP_DIRECT	GO:0000079~regulation of cyclin-dependent protein serine/threonine kinase activity	4	0.482509	0.0931988	CCNJ, CCND1, CCNE1, CCNJL	623	35	20094	3.68613	1	0.913348	0.891602
GOTERM_BP_DIRECT	GO:0030099~myeloid cell differentiation	4	0.482509	0.0931988	IRF8, GATA1, DLL1, TIRAP	623	35	20094	3.68613	1	0.913348	0.891602
GOTERM_BP_DIRECT	GO:0043627~response to estrogen	6	0.723764	0.0941185	LDHA, MSTN, CCND1, EPO, CITED4, HSPD1	623	78	20094	2.48105	1	0.916737	0.894909
GOTERM_BP_DIRECT	GO:0051649~establishment of localization in cell	11	1.3269	0.0956295	CYSLTR1, ADGRV1, ATP7B, SCN11A, CHRNA7, SLC11A1, AQP4, APOB, ERFE, SLC4A4, SCN4B	623	201	20094	1.76512	1	0.916737	0.894909
GOTERM_BP_DIRECT	GO:2000767~positive regulation of cytoplasmic translation	3	0.361882	0.0958123	LIN28A, PKM, IGF2BP1	623	17	20094	5.69181	1	0.916737	0.894909
GOTERM_BP_DIRECT	GO:0033630~positive regulation of cell adhesion mediated by integrin	3	0.361882	0.0958123	RET, FOXC2, NCKAP1L	623	17	20094	5.69181	1	0.916737	0.894909
GOTERM_BP_DIRECT	GO:0045956~positive regulation of calcium ion-dependent exocytosis	3	0.361882	0.0958123	CACNA1I, CLTRN, SYT7	623	17	20094	5.69181	1	0.916737	0.894909
GOTERM_BP_DIRECT	GO:0086005~ventricular cardiac muscle cell action potential	3	0.361882	0.0958123	KCNH2, PKP2, SCN5A	623	17	20094	5.69181	1	0.916737	0.894909
GOTERM_BP_DIRECT	GO:0035909~aorta morphogenesis	3	0.361882	0.0958123	FGF8, CHD7, FOXH1	623	17	20094	5.69181	1	0.916737	0.894909
GOTERM_BP_DIRECT	GO:0097067~cellular response to thyroid hormone stimulus	3	0.361882	0.0958123	KIT, ATP1A3, GATA1	623	17	20094	5.69181	1	0.916737	0.894909
GOTERM_BP_DIRECT	GO:0071363~cellular response to growth factor stimulus	6	0.723764	0.0980694	IBSP, TH, LRP2, BMPR1B, ACVR2B, LRP8	623	79	20094	2.44964	1	0.935565	0.913289
GOTERM_BP_DIRECT	GO:0030514~negative regulation of BMP signaling pathway	5	0.603136	0.0997018	DLX1, VWC2, LRP2, CHRDL1, HIPK2	623	57	20094	2.82926	1	0.945559	0.923045
GOTERM_BP_DIRECT	GO:0043507~positive regulation of JUN kinase activity	5	0.603136	0.0997018	FGD4, FZD5, FZD4, FZD8, TIRAP	623	57	20094	2.82926	1	0.945559	0.923045

## Sheet: GO-E12 5vsgroupE10 5_deg_up
Category	Term	Count	%	PValue	Genes	List Total	Pop Hits	Pop Total	Fold Enrichment	Bonferroni	Benjamini	FDR
GOTERM_BP_DIRECT	GO:0007155~cell adhesion	116	7.54226	1.28075e-26	RIPOR2, COL16A1, CLSTN2, COL12A1, PCDH11X, TNC, CLDN1, ALCAM, SVEP1, PCDHAC2, CD177, TMEM8B, KIRREL3, POSTN, EPHA8, APLP1, FIBCD1, OMD, PRKCA, DSG1B, DSG1A, COL8A2, COL8A1, PKP1, ASTN1, DSC3, CALCA, PCDH10, PCDH15, DPT, THY1, PCDH18, FBLN5, FLRT2, FLRT1, IGFBP7, CDH26, CADM3, CADM2, AMBN, SDK1, COL5A1, ITGA11, PCDHB6, PCDHB5, RADIL, PCDHB4, HPSE, FAT4, PCDHB3, CNTN4, PCDHB9, SDK2, PCDHB8, PCDHB7,…	1299	602	20094	2.9807	6.373e-23	6.373e-23	6.19882e-23
GOTERM_BP_DIRECT	GO:0030198~extracellular matrix organization	53	3.44603	2.57401e-20	COL16A1, OLFML2B, HPSE2, ELN, OLFML2A, RXFP1, ADAMTSL1, MMP23, LGALS3, ADAMTS5, ADAMTS2, ADAMTSL3, ADAMTS7, CSGALNACT1, PDGFRA, SCARA3, POSTN, EGFL6, COL27A1, COL25A1, MMP2, APLP1, MMP9, ADAMTS20, MMP11, MMP14, ITGA8, COL8A2, COL8A1, COL6A6, MATN4, MATN2, COL17A1, COL11A2, NDNF, TNFRSF11B, FBLN2, FBLN5, ABI3BP, ADAMTS17, TGFB2, WNT3A, AMBN, KAZALD1, COL1A1, SMOC2, COL3A1, COL1A2, COL5A1, COL5A2, …	1299	184	20094	4.45569	1.28083e-16	6.40414e-17	6.22911e-17
GOTERM_BP_DIRECT	GO:0007156~homophilic cell adhesion via plasma membrane adhesion molecules	48	3.12094	7.40851e-18	PTPRT, ROBO2, CLSTN2, PCDH10, PCDH11X, PCDH15, PCDHB22, PCDHB21, PCDH18, PCDHB20, CDH26, PCDHAC2, KIRREL3, CADM3, PCDH9, CADM2, PCDHGA2, PCDH8, PCDHB15, PCDHB14, PCDHB13, PCDHB12, DSG1B, PCDHB11, DSG1A, PCDHB10, SDK1, PCDHB19, PCDHB18, PALLD, PCDHB17, CDH10, PCDHB16, CDH12, PCDHB6, CDH13, PCDHB5, PCDHB4, DSG3, FAT4, PCDHB3, PCDHB9, SDK2, CDH18, PCDHB8, DSC3, CDH19, PCDHB7	1299	172	20094	4.31688	3.68647e-14	1.22882e-14	1.19524e-14
GOTERM_BP_DIRECT	GO:0007275~multicellular organism development	138	8.97269	3.07227e-14	FOXA1, EPHB6, SEMA5A, SERPINE2, MYT1L, RORC, SCX, PRDM1, FZD10, FGF2, ZFP36, CREB3L1, CREB3L2, INSC, HOXA1, EPHA5, SEMA6B, PDGFRA, MEF2C, PAQR7, EPHA8, FST, WNT5A, EBF1, EBF3, UNC5C, UNC5D, DKK1, HIC1, DKK2, DKK3, EDAR, DKK4, TSHZ3, HOXD1, TSHZ2, SHOX2, TWIST2, CHRD, MST1R, EFNB1, NHLH2, FLRT2, NHLH1, FLRT1, ALX1, CNMD, WNT4, NTNG1, WNT10B, WNT10A, JAG1, DNASE2A, GADD45B, WNT3A, SIAH2, FZD9, ARHG…	1299	1095	20094	1.9495	1.53028e-10	3.8219e-11	3.71745e-11
GOTERM_BP_DIRECT	GO:0030199~collagen fibril organization	23	1.49545	5.93632e-13	TGFB2, CRTAP, ANXA2, COL14A1, LUM, COL11A2, SCX, DPT, P3H1, LOXL1, LOXL2, COL1A1, GREM1, MMP11, ACAN, ADAMTS2, COL3A1, COL1A2, LOX, COL5A1, COL5A2, FMOD, ADAMTS7	1299	54	20094	6.58857	2.95393e-09	5.90782e-10	5.74636e-10
GOTERM_BP_DIRECT	GO:0051965~positive regulation of synapse assembly	26	1.69051	2.33418e-12	NLGN3, NLGN1, OXTR, CLSTN2, NRXN1, IL1RAP, THBS2, SRPX2, FLRT2, LRRTM3, ADGRE5, LRRTM4, LRRTM1, FLRT1, SLITRK3, SYNDIG1, LRRC4B, LINGO2, NTRK2, LRRN3, PRKCA, PTPRD, ADGRB2, ADGRB3, IL1RAPL1, ADGRL3	1299	74	20094	5.43499	1.16146e-08	1.93582e-09	1.88291e-09
GOTERM_BP_DIRECT	GO:0042060~wound healing	31	2.0156	6.17141e-12	SPARC, SDC4, ALOX15, TNC, ADRB1, ADRB2, EVPL, FGF2, PPL, EGFR, AQP1, CNN2, FGF7, ITGB6, KRT6A, PDGFRA, POSTN, TGFB2, GSN, TGFB3, ITGA2, CAV1, NOG, WNT5A, TPM1, DCN, TGFBR2, COL1A1, COL3A1, LOX, HPSE	1299	109	20094	4.39939	3.07089e-08	4.38699e-09	4.26709e-09
GOTERM_BP_DIRECT	GO:0010628~positive regulation of gene expression	83	5.39662	1.89222e-11	PID1, TNC, SCX, PRDM1, NR2E3, CLU, FGF2, PPP3CA, FGF7, CYP26B1, C1QTNF1, CREB3L2, HEY2, BLNK, CTSH, LGALS9, LGALS7, OSR2, MEF2C, OSR1, TESC, WNT5A, NOG, NGF, WNT16, SOX10, DKK1, RUNX2, NKX2-2OS, EDAR, AR, ADCYAP1, HAND2, ALDH1A2, PKP1, VSTM2A, CD44, CNGB1, RBMS3, PTGER4, CEBPA, NRXN1, PTGER3, LEF1, NTS, RELB, CNN2, WNT11, GJC2, CAMK2N1, LMNA, FGF20, PPARGC1A, SEC16B, CD74, NTRK2, EGR1, WNT10A, TG…	1299	583	20094	2.20225	9.41568e-08	1.17696e-08	1.14479e-08
GOTERM_BP_DIRECT	GO:0002062~chondrocyte differentiation	23	1.49545	9.15278e-11	OSR2, WNT10B, MEF2C, OSR1, SHOX2, COL11A2, SCX, PRKCA, LTBP3, WNT9A, PTH1R, CHRDL2, RUNX3, RUNX2, PTHLH, RUNX1, COL3A1, BMP2, NFIB, TRPS1, CREB3L2, CYTL1, ADAMTS7	1299	67	20094	5.31019	4.55442e-07	5.06047e-08	4.92216e-08
GOTERM_BP_DIRECT	GO:0030154~cell differentiation	118	7.6723	7.52187e-10	FOXA1, SEMA5A, RIPOR2, EHF, CPNE5, SERPINE2, MYT1L, RORC, SCX, RXFP1, FGF2, ETS2, LGALS3, FGF7, SOX18, INSC, SEMA6B, KRTDAP, OSR2, MEF2C, PAQR7, OSR1, FST, WNT5A, SOX10, RUNX2, EDAR, ARMC2, EID1, ERG, SDC2, TWIST2, CPLX2, GLIS1, EFNB1, NHLH2, NHLH1, FGF20, CNMD, WNT4, NTNG1, PLK5, GADD45B, CAV2, CAV1, RARRES2, SMAD9, ARHGAP24, DCLK1, BMP6, NFATC4, BMP3, DAB2, BMP2, CSPG5, CSPG4, SIM1, ZFP750, ROB…	1299	1022	20094	1.78603	3.74288e-06	3.74288e-07	3.64059e-07
GOTERM_BP_DIRECT	GO:0007411~axon guidance	38	2.47074	9.60491e-10	SEMA5A, EPHB6, ROBO2, RTN4R, DRAXIN, NRP2, LAMA2, LAMA3, EFNB1, EDNRA, ALCAM, RELN, FLRT2, NTF3, BOC, SLIT3, SEMA6B, EPHA5, SEMA4A, TGFB2, WNT3A, EPHA8, NOG, WNT5A, SEMA4F, UNC5C, UNC5D, GFRA3, RUNX3, GDF7, EFNA1, EFNA3, GAP43, NR4A3, RTN4RL1, GAS1, CNTN4, MATN2	1299	188	20094	3.12668	4.77939e-06	4.05586e-07	3.94501e-07
GOTERM_BP_DIRECT	GO:0001649~osteoblast differentiation	27	1.75553	9.78101e-10	LEF1, SHOX2, COL11A2, TWIST2, FHL2, CHRD, FGF2, GLIS1, WNT11, CREB3L1, PENK, RSPO2, GDF10, WNT10B, MEF2C, WNT3A, IGFBP3, NOG, BMP6, RUNX2, COL1A1, TGFBR3, BMP3, BMP2, LOX, HAND2, SP7	1299	102	20094	4.09469	4.86702e-06	4.05586e-07	3.94501e-07
GOTERM_BP_DIRECT	GO:0001503~ossification	28	1.82055	4.97672e-09	CALCA, IFITM1, SPARC, THRA, NPR2, LRRC17, ALOX15, PTH1R, PTN, CHRDL2, ADAMTS7, MYOG, GDF10, FZD9, RUNX3, KAZALD1, MMP9, BMP6, RUNX2, RUNX1, GFRA4, COL1A1, IGSF10, BMP3, MMP14, BMP2, COL5A2, MGP	1299	117	20094	3.70194	2.47639e-05	1.90494e-06	1.85287e-06
GOTERM_BP_DIRECT	GO:0007399~nervous system development	62	4.03121	1.1068e-08	SEMA5A, ROBO2, NRP2, NRSN2, ZFP488, SERPINE2, MYT1L, GRIK1, LDB2, IRF2BPL, NRBP2, INSC, BOC, HOXA1, PCDHAC2, DACT1, SEMA6B, EPHA5, MYLIP, MEF2C, CAMK1D, EPHA8, MAGI2, PAX3, GFRA3, GFRA2, GFRA4, ADCYAP1, GAP43, GAL, TRNP1, ITGA8, NBL1, SHANK1, CHODL, NLGN1, PLPPR1, CTF1, SDC2, 2510009E07RIK, NDNF, MST1R, CPLX2, PCDH18, EFNB1, ATXN1, NTF3, SLIT3, SCN3B, BRINP3, NTNG1, NTRK2, SEMA4A, SEMA4F, SMARCA2…	1299	438	20094	2.18965	5.50729e-05	3.93389e-06	3.82637e-06
GOTERM_BP_DIRECT	GO:0048839~inner ear development	21	1.36541	1.30602e-08	H2-T23, CEBPA, TGFB2, JAG1, SPARC, CEBPD, TGFB3, H2-DMA, EYA4, HPCA, PCDH15, LIN7A, CYS1, CXCL14, GJB2, BMP2, BMPER, GJB6, HOXA1, IGFBP7, CYTL1	1299	71	20094	4.57529	6.49856e-05	4.33252e-06	4.2141e-06
GOTERM_BP_DIRECT	GO:0008285~negative regulation of cell proliferation	60	3.90117	3.58171e-08	IFITM1, BTG1, SERPINE2, FLT3, NRK, PTH1R, NR2E3, FGF2, RERG, ADORA1, BDKRB2, TIMP2, TNS2, MYOG, IGFBP3, TESC, MAGI2, TRP73, PRKCA, P3H3, WNT9A, TGFBR2, RUNX1, AR, GAL, ALDH1A2, CDH13, ATF5, CEBPA, TWIST2, DPT, NDRG1, SCIN, CAMK2N1, ABI3BP, LMNA, SLIT3, MSX1, TGFB2, CDKN2C, PLK5, BCL11B, TGFB3, CAV2, CAV1, NMI, INHBA, KLF4, SMARCA2, CPEB1, BMP2, RGCC, BCL6, NFIB, GJB6, FXYD2, PMP22, ACKR3, CD9, CD…	1299	431	20094	2.15343	0.00017821	1.10121e-05	1.07112e-05
GOTERM_BP_DIRECT	GO:0045944~positive regulation of transcription from RNA polymerase II promoter	128	8.3225	3.76219e-08	FOXA1, EHF, CRTC3, PID1, MYT1L, SCX, AHR, NR3C1, FGF2, ETS2, RPS6KA4, SOX18, CREB3L1, CREB3L2, HOXA1, IER5, OSR2, MEF2C, OSR1, WNT5A, EBF1, TRP73, EBF3, CYS1, SOX10, RUNX2, RUNX1, AR, ADCYAP1, ERG, ATF5, GLIS3, AGAP2, ADRB2, FBLN5, GLIS1, NPAS2, NHLH2, ATXN1, NHLH1, ALX1, CYTL1, PPARGC1A, S100A10, EGR1, WNT10B, JAG1, BCL11B, TGFB3, WNT3A, NFATC2, NFATC1, INHBA, SMARCA1, SMARCA2, BMP6, FOSL2, NFAT…	1299	1216	20094	1.6283	0.000187189	1.10121e-05	1.07112e-05
GOTERM_BP_DIRECT	GO:0016525~negative regulation of angiogenesis	24	1.56047	7.19448e-08	SEMA4A, TGFB2, SPARC, STAT1, PLK2, HHIP, FOXJ2, ATP2B4, GPR4, ADRB2, PTN, ISM1, THBS2, KLF4, FBLN5, DCN, EFNA3, RGCC, ADGRB2, ADGRB3, NGP, TNMD, CNMD, PF4	1299	100	20094	3.71252	0.000357933	1.98887e-05	1.93452e-05
GOTERM_BP_DIRECT	GO:0006954~inflammatory response	55	3.57607	9.32045e-08	IL1RAP, CXCL5, RPS6KA4, CYP26B1, ITGB6, PTGDR, PTGIR, ANXA1, CAMK1D, IL1R1, SPHK1, TRP73, AGTR1A, HCK, GAL, CHIL1, CHST1, PRKCQ, AGTR2, S100A9, CD44, CHST2, S100A8, PTGER4, CALCA, LXN, PLGRKT, PTGER2, PTGER3, PLA2G7, RELB, IL1RL2, S1PR3, TAC1, GSDMD, GM10591, AFAP1L2, EPHX2, RARRES2, PPBP, IFI202B, BMP6, P2RX7, BMP2, BCL6, TNIP1, TNIP2, AXL, PLP1, F2RL1, CSPG4, ACKR1, HPSE, IL17D, PF4	1299	390	20094	2.1815	0.000463678	2.44098e-05	2.37426e-05
GOTERM_BP_DIRECT	GO:0045778~positive regulation of ossification	12	0.780234	1.50321e-07	PTGER4, P2RX7, NELL1, WNT10B, TGFB2, BMP2, THRB, WNT5A, PTN, TAC1, CNMD, RUNX2	1299	25	20094	7.42503	0.000747719	3.69609e-05	3.59507e-05
GOTERM_BP_DIRECT	GO:0001501~skeletal system development	26	1.69051	1.55985e-07	CDKN1C, COL11A2, WFIKKN2, NPR3, CHRD, PTH1R, LTBP3, DNM3OS, PTHLH, ACAN, LGALS3, TRPS1, GJA5, TGFB2, FST, NOG, MMP9, RUNX2, PAX1, RUNX1, COL1A1, COL3A1, MMP14, COL1A2, COL5A2, FBN1	1299	120	20094	3.35158	0.000775878	3.69609e-05	3.59507e-05
GOTERM_BP_DIRECT	GO:0007165~signal transduction	137	8.90767	2.2533e-07	OXTR, OLFML2B, CHRM1, RASL11B, DGKB, HHIP, NPY2R, IL1RAP, FZD10, OLFML2A, RXFP1, RXFP3, RGS5, EDNRA, GRB14, ADORA1, LEPR, PTGDR, IL1R1, MAGI2, WNT5A, UNC5C, UNC5D, GABRG3, OLFM5, GEM, ADGRB2, ADGRB3, SPARCL1, AGTR2, RIN2, ENPEP, CHRNA5, RRAD, PDE1A, NPR2, NPR3, ADRB1, TNFRSF11B, ADRB2, NRADD, NDRG1, TRHDE, ADGRG2, ADGRG6, SFN, WNT4, WNT10B, GPR17, TGFB2, WNT10A, LVRN, WNT3A, FZD9, HTR1A, RASSF8, …	1299	1368	20094	1.54914	0.00112061	5.09656e-05	4.95726e-05
GOTERM_BP_DIRECT	GO:0030501~positive regulation of bone mineralization	15	0.975293	6.96075e-07	OSR2, WNT10B, KL, MEF2C, TGFB3, OSR1, FZD9, ADRB2, PTN, TENT5A, BMP6, P2RX7, NELL1, BMP2, WNT4	1299	46	20094	5.04418	0.00345768	0.000150594	0.000146478
GOTERM_BP_DIRECT	GO:0090090~negative regulation of canonical Wnt signaling pathway	26	1.69051	1.38744e-06	DRAXIN, PRICKLE1, NKD1, NKD2, WNT11, DACT1, EGR1, TLE2, SIAH2, CAV1, NOG, WNT5A, DKK1, SOX10, BICC1, DKK2, TLE6, DKK3, DKK4, GREM1, DAB2, BMP2, LATS2, SNAI2, NOTUM, RBMS3	1299	134	20094	3.00141	0.00688011	0.000276155	0.000268608
GOTERM_BP_DIRECT	GO:0006813~potassium ion transport	26	1.69051	1.38744e-06	KCNE4, KCNA4, ATP1A2, KCNA5, KCNA6, AQP1, KCNV1, GJA5, KCNMB2, KCNMB4, KCNJ2, KCNJ3, KCNH3, KCNIP2, KCNB1, KCNIP3, KCNB2, KCNU1, FXYD3, KCNS2, FXYD2, KCNS3, KCNMA1, FXYD1, KCNQ5, KCNK2	1299	134	20094	3.00141	0.00688011	0.000276155	0.000268608
GOTERM_BP_DIRECT	GO:0001568~blood vessel development	19	1.23537	1.44589e-06	MEF2C, TGFB2, LAMA4, SPHK1, AHR, ANTXR1, AGTR1A, COL1A1, TGFBR3, COL3A1, COL1A2, BMPER, LOX, COL5A1, SOX18, ALDH1A2, GJA5, HEY2, GJA4	1299	77	20094	3.81698	0.00716896	0.000276722	0.000269159
GOTERM_BP_DIRECT	GO:0007189~adenylate cyclase-activating G-protein coupled receptor signaling pathway	25	1.62549	1.5255e-06	PTGER4, CALCA, PTGER2, PTGER3, ADRB1, ADCY2, PTH1R, ADRB2, ADCY8, RXFP1, PTHLH, ADCY5, MC4R, ADGRG2, ADGRE5, ADGRG6, S1PR3, PTGIR, GPR4, ADCYAP1, ADGRB2, ADGRB3, RAMP1, ADGRL3, PF4	1299	126	20094	3.06921	0.00756215	0.000281144	0.00027346
GOTERM_BP_DIRECT	GO:0007169~transmembrane receptor protein tyrosine kinase signaling pathway	24	1.56047	1.65411e-06	EPHA5, PTPRT, EPHB6, PDGFRA, NTRK2, ANGPT1, FLT3, EPHA8, INSRR, MST1R, NGF, GFRA3, GFRA2, EGFR, GFRA4, ZAP70, HCK, AXL, NTF3, BLNK, NRTN, CSPG4, FGFR4, FRK	1299	118	20094	3.1462	0.00819707	0.000293959	0.000285925
GOTERM_BP_DIRECT	GO:0009612~response to mechanical stimulus	17	1.10533	2.132e-06	POSTN, STAT1, CAV1, MMP2, TNC, KCNA5, PPL, DCN, TGFBR2, P2RX7, COL1A1, MMP14, COL3A1, CHIL1, TXNIP, ASIC3, KCNK2	1299	64	20094	4.10891	0.0105528	0.000365822	0.000355824
GOTERM_BP_DIRECT	GO:0007268~chemical synaptic transmission	32	2.08062	2.62749e-06	NLGN3, GRIA2, GABRB1, NLGN1, CHRM1, CHRNA5, NRXN1, CACNA1C, HTR2A, DOC2B, CACNA1G, GRIN2A, GRM7, SV2A, NPY, GRM8, PENK, TAC1, GABRA2, GABRP, GABRA1, CAV2, GABRA4, PCDH8, HTR1A, HTR1B, GABRG3, GRIN2B, DLG2, KCNMA1, PCDHB16, APBA1	1299	194	20094	2.55156	0.0129893	0.000435813	0.000423901
GOTERM_BP_DIRECT	GO:0009887~animal organ morphogenesis	28	1.82055	2.76317e-06	THRB, LAMA2, THRA, LAMC3, HHIP, LAMA3, FGF2, TGM1, FGF7, WNT11, FGF20, SLIT3, NTNG1, WNT10B, PDGFRA, WNT10A, JAG1, WNT3A, TGFB3, WNT5A, PAX1, TGFBR2, GREM1, GREM2, BMP2, PRKAR1B, PAX9, NBL1	1299	157	20094	2.75877	0.0136554	0.000443533	0.00043141
GOTERM_BP_DIRECT	GO:0016055~Wnt signaling pathway	36	2.3407	3.911e-06	DRAXIN, TGFB1I1, LEF1, FZD10, APCDD1, NKD1, NKD2, WNT11, WIF1, RSPO2, RAC3, RSPO3, WNT4, DACT1, KRT6A, WNT10B, WNT10A, TLE2, WNT3A, WNT5A, FZD9, WNT9A, KREMEN2, WNT16, DKK1, HIC1, DKK2, DKK3, DKK4, DAB2, BMP2, DAAM2, CPE, NOTUM, LGR6, CD44	1299	237	20094	2.34969	0.019273	0.000608161	0.000591539
GOTERM_BP_DIRECT	GO:0006811~ion transport	69	4.48635	4.0335e-06	RYR2, GABRB1, SLC40A1, GRIK1, NIPAL1, SLC22A18, KCNH3, SCARA5, CACNA2D1, CACNA2D3, GABRG3, TMEM37, SLC5A7, KCNU1, KCNMA1, SLC9A9, SLCO2A1, KCNQ5, CFTR, GRIA2, TMEM63A, CHRNA5, KCNE4, KCNA4, ATP1A2, KCNA5, CACNA1C, KCNA6, KCNV1, GRIN2A, CNNM1, CALHM2, ATP5E, KCNMB2, KCNMB4, KCNE1L, TRPM5, SCN3B, ASIC3, KCNJ2, CACNG4, KCNJ3, GABRA2, GABRA1, GABRP, SLC31A2, KCNIP2, KCNB1, KCNIP3, KCNB2, GABRA4, ATP2…	1299	599	20094	1.78188	0.0198707	0.000608203	0.00059158
GOTERM_BP_DIRECT	GO:0060325~face morphogenesis	13	0.845254	6.85305e-06	PDGFRA, TGFB2, TGFB3, MMP2, NOG, LEF1, TWIST2, SCX, ARID5B, DKK1, COL1A1, PAX9, MSX1	1299	41	20094	4.90475	0.033526	0.00100296	0.000975551
GOTERM_BP_DIRECT	GO:0071560~cellular response to transforming growth factor beta stimulus	17	1.10533	7.49363e-06	WNT10A, MEF2C, POSTN, CAV1, WNT5A, SCX, NR3C1, CLDN1, RUNX1, COL1A1, DAB2, CILP, PENK, PDE3A, PPARGC1A, FBN1, WNT4	1299	70	20094	3.75671	0.0366018	0.00106538	0.00103626
GOTERM_BP_DIRECT	GO:0007204~positive regulation of cytosolic calcium ion concentration	29	1.88557	1.06803e-05	PTGER4, CALCA, OXTR, PTGER2, PTGER3, NPY2R, CIB2, CACNA1C, HTR2A, PTH1R, ADRA1B, ADCY8, ADCY5, CACNA1G, EDNRA, C1QTNF1, BDKRB2, TAC1, CD55, PTGDR, PDGFRA, PTGIR, AVPR1A, AGTR1A, ADCYAP1, TRPV4, FKBP1B, ACKR3, F2RL1	1299	178	20094	2.5202	0.0517578	0.00147625	0.0014359
GOTERM_BP_DIRECT	GO:0010977~negative regulation of neuron projection development	19	1.23537	1.50487e-05	RTN4R, DRAXIN, MYLIP, BCL11A, WNT3A, LRRK2, STMN2, DKK1, DAB2, EFEMP1, LGALS1, RTN4RL1, TRPV4, PMP22, RAB29, SPOCK1, CSPG4, VIM, RUNX1T1	1299	90	20094	3.26564	0.0721481	0.00202385	0.00196854
GOTERM_BP_DIRECT	GO:0051968~positive regulation of synaptic transmission, glutamatergic	12	0.780234	1.86014e-05	NLGN3, NTRK2, ADCYAP1, NLGN1, GRIN2A, OXTR, RELN, TSHZ3, NRXN1, GRIN2B, EGFR, CACNG4	1299	38	20094	4.88489	0.0884066	0.00240536	0.00233961
GOTERM_BP_DIRECT	GO:0034765~regulation of ion transmembrane transport	25	1.62549	1.88523e-05	KCNE4, KCNA4, KCNA5, CACNA1C, KCNA6, CACNA1G, KCNV1, TRPM5, SCN3B, KCNJ2, CACNG4, KCNJ3, KCNH3, KCNIP2, KCNB1, CACNA2D1, KCNIP3, KCNB2, CACNA2D3, TMEM37, KCNU1, KCNS2, KCNS3, KCNMA1, KCNQ5	1299	145	20094	2.66704	0.089544	0.00240536	0.00233961
GOTERM_BP_DIRECT	GO:0030324~lung development	24	1.56047	1.95519e-05	FOXA1, PDGFRA, CEBPA, RAB3A, SPARC, MME, TSHZ3, WNT5A, PTN, TBX4, FGF2, EGFR, TGFBR2, FGF7, MMP14, ADAMTS2, COL3A1, LOX, NFIB, ALDH1A2, MGP, CHIL1, FGFR4, CFTR	1299	136	20094	2.72979	0.0927083	0.00243226	0.00236578
GOTERM_BP_DIRECT	GO:0051216~cartilage development	19	1.23537	2.06243e-05	CSGALNACT1, LUM, NOG, COL11A2, WNT5A, SCX, SMAD9, WNT9A, CHRDL2, BMP6, TGFBR2, BMP3, COL3A1, BMP2, MGP, CREB3L2, MSX1, CNMD, CD44	1299	92	20094	3.19465	0.0975372	0.00250309	0.00243468
GOTERM_BP_DIRECT	GO:0030509~BMP signaling pathway	21	1.36541	2.27385e-05	ZCCHC12, EGR1, TGFB2, TMPRSS6, WNT3A, TGFB3, FST, NOG, LEF1, WNT5A, CHRD, SCX, SMAD9, BMP6, RUNX2, GDF7, TMEM100, TGFBR3, BMP2, BMPER, MSX1	1299	110	20094	2.95314	0.106981	0.00269397	0.00262034
GOTERM_BP_DIRECT	GO:0050804~modulation of synaptic transmission	19	1.23537	3.24569e-05	NLGN3, NTNG1, NLGN1, DGKB, WNT3A, PCDH8, GRIK1, NGF, ADCY8, BAIAP3, PTPRD, PPP3CA, GRIN2A, RELN, PRKAR1B, NTF3, CSPG5, NCAM1, LRRC4C	1299	95	20094	3.09376	0.14914	0.00375594	0.00365328
GOTERM_BP_DIRECT	GO:0000122~negative regulation of transcription from RNA polymerase II promoter	96	6.24187	3.54549e-05	FOXA1, CDKN1C, DUBR, THRB, THRA, MYT1L, RORC, ATN1, FHL2, CHD3, LDB2, AHR, PRDM1, NR3C1, NR2E3, ETS2, LOXL2, IRF2BPL, ZFP36, A430033K04RIK, SOX18, TRIM29, TRPS1, HEY2, LMCD1, DACT1, OSR2, FOXD3, MEF2C, OSR1, FST, NOG, PAX3, ARID5B, EN1, SOX10, DKK1, RUNX3, HIC1, TLE6, RUNX1, EID1, AR, ZEB2, IFI27, TXNIP, CEBPA, ZBTB8A, NFIX, TMPRSS6, LEF1, SHOX2, GLIS3, TWIST2, AEBP1, ZBTB4, GLIS1, FBLN5, ATXN1, …	1299	975	20094	1.52308	0.16174	0.00400962	0.00390004
GOTERM_BP_DIRECT	GO:0099560~synaptic membrane adhesion	10	0.650195	4.28258e-05	PTPRD, NTNG1, NLGN1, LRFN5, NRXN1, SLITRK3, SPARCL1, IL1RAP, LRRC4C, LRRC4B	1299	28	20094	5.52458	0.191929	0.00471234	0.00458355
GOTERM_BP_DIRECT	GO:0045669~positive regulation of osteoblast differentiation	17	1.10533	4.4198e-05	GDF10, PTGER4, WNT10B, CEBPA, IFITM1, MEF2C, JAG1, CEBPD, TENT5A, FGF2, BMP6, RUNX2, PPP3CA, NELL1, BMP2, LMNA, WNT4	1299	80	20094	3.28712	0.197428	0.00471234	0.00458355
GOTERM_BP_DIRECT	GO:0042311~vasodilation	14	0.910273	4.45096e-05	CALCA, NPR3, ADRB2, EGFR, ADRA2A, ADCYAP1, GJA5, KCNMA1, ADORA1, BDKRB2, F2RL1, AGTR2, VSTM4, CFTR	1299	56	20094	3.86721	0.198672	0.00471234	0.00458355
GOTERM_BP_DIRECT	GO:0051480~regulation of cytosolic calcium ion concentration	13	0.845254	4.9472e-05	CHGA, RYR2, CALCA, CAV2, CAV1, FZD9, ATP2B4, ADCY8, HCRTR2, CALB1, FKBP1B, FXYD1, CNGB1	1299	49	20094	4.10397	0.218217	0.00512859	0.00498842
GOTERM_BP_DIRECT	GO:0007193~adenylate cyclase-inhibiting G-protein coupled receptor signaling pathway	13	0.845254	6.1302e-05	GABBR2, GPR37, NPR3, NPY2R, HTR1B, SSTR2, SSTR5, ADCY5, EDNRA, GRM7, GRM8, ADORA1, S1PR3	1299	50	20094	4.02189	0.262912	0.00622528	0.00605514
GOTERM_BP_DIRECT	GO:0045165~cell fate commitment	17	1.10533	7.05912e-05	WNT10B, WNT10A, MEF2C, WNT3A, TGFB1I1, WNT5A, PRDM1, WNT9A, WNT16, GDF7, GAP43, BMP2, WNT11, TLX1, HEY2, GAS1, WNT4	1299	83	20094	3.16831	0.296209	0.00696405	0.00677372
GOTERM_BP_DIRECT	GO:0032496~response to lipopolysaccharide	28	1.82055	7.1376e-05	PTGER4, SPARC, HPGD, PTGER2, PTGER3, CLDN1, CXCL5, LOXL1, EDNRA, DUSP10, PENK, LGALS9, S100A14, TAC1, GGT7, PTGIR, STAT1, FMO1, IRAK3, DCN, P2RX7, NFKBIA, GJB2, SLPI, GJB6, ALPL, S100A9, S100A8	1299	187	20094	2.31619	0.298952	0.00696405	0.00677372
GOTERM_BP_DIRECT	GO:2000310~regulation of NMDA receptor activity	8	0.520156	7.80637e-05	NLGN3, NLGN1, GRIN2A, MEF2C, RELN, NRXN1, CNIH2, PPARGC1A	1299	18	20094	6.87503	0.3219	0.0074701	0.00726593
GOTERM_BP_DIRECT	GO:0001755~neural crest cell migration	13	0.845254	9.24315e-05	SEMA5A, SEMA6B, SEMA4A, NRP2, PAX3, SEMA4F, SOX10, EFNB1, ZEB2, ANXA6, NRTN, RADIL, ALX1	1299	52	20094	3.86721	0.368691	0.0086781	0.00844091
GOTERM_BP_DIRECT	GO:0007568~aging	28	1.82055	0.000102925	CDKN1C, C1QA, CALCA, NPY2R, GSTT1, HTR2A, PTH1R, CLDN1, FGF2, PPP3CA, UCP2, PENK, TIMP2, APOD, NCAM1, PPARGC1A, KL, GSN, TGFB3, MMP2, TACR3, MMP9, AGTR1A, DCN, TGFBR2, GJB2, GJB6, KRT14	1299	191	20094	2.26768	0.400812	0.00948434	0.00922512
GOTERM_BP_DIRECT	GO:0030182~neuron differentiation	33	2.14564	0.000115919	FOXA1, HOXD1, MYT1L, NRBP2, WNT11, WNT4, IRX1, WNT10B, NTRK2, WNT10A, EMX2, MEF2C, JAG1, IRX5, WNT3A, IRX6, WNT5A, IRX4, EN1, WNT9A, SMARCA1, WNT16, RUNX3, BMP6, RUNX2, RUNX1, PTPRD, EFNA1, TLX1, ALDH1A2, IL1RAPL1, DDIT4, NBL1	1299	245	20094	2.08356	0.438334	0.0103717	0.0100882
GOTERM_BP_DIRECT	GO:0060078~regulation of postsynaptic membrane potential	8	0.520156	0.000116723	GABRA2, GABRA1, ADCYAP1, GRIN2A, GABRA4, RGS7BP, GABRG3, GRIN2B	1299	19	20094	6.51319	0.440575	0.0103717	0.0100882
GOTERM_BP_DIRECT	GO:0019233~sensory perception of pain	16	1.04031	0.000121167	MME, HOXD1, KCNIP3, EPHX2, ADRB1, HTR2A, NGF, AQP1, P2RX7, ADCYAP1, EDNRA, GRIN2A, DLG2, PENK, SCN3B, TAC1	1299	78	20094	3.17309	0.452813	0.0105777	0.0102886
GOTERM_BP_DIRECT	GO:0007613~memory	20	1.30039	0.000155565	OXTR, PLK2, NOG, SLC1A1, FOXO6, ADRB1, HTR2A, PTN, NGF, CYP7B1, S100B, ADCY8, GRIN2B, GRIN2A, ATXN1, GRM7, PPP1R1B, NTF3, ITGA8, KCNK2	1299	116	20094	2.66704	0.538904	0.0132724	0.0129097
GOTERM_BP_DIRECT	GO:0010718~positive regulation of epithelial to mesenchymal transition	12	0.780234	0.00015737	COL1A1, TGFB2, DAB2, BMP2, RGCC, TGFB3, GLIPR2, TGFB1I1, LEF1, ALX1, LOXL2, TGFBR2	1299	47	20094	3.94949	0.543028	0.0132724	0.0129097
GOTERM_BP_DIRECT	GO:0016477~cell migration	38	2.47074	0.000165804	ENPEP, SPEF1, SDC4, ITGB4, LAMC3, SDC2, LAMA3, ASAP3, ATN1, MST1R, TSPAN11, AQP1, RELN, SVEP1, CTNNA2, ITGB6, NTNG1, PDGFRA, TGFB2, MMP2, WNT5A, PAX3, NFATC2, EMP2, RHOF, EFNA1, TGFBR3, MMP14, COL5A1, SH3D21, PALLD, AXL, SNAI2, CD248, RHOV, FGFR4, CD44, ASTN1	1299	305	20094	1.92726	0.561813	0.0137507	0.0133748
GOTERM_BP_DIRECT	GO:0032967~positive regulation of collagen biosynthetic process	10	0.650195	0.00017833	CBX8, RGCC, TGFB3, CREB3L1, ITGA2, SCX, VIM, LTBP1, LARP6, WNT4	1299	33	20094	4.68752	0.588296	0.0145471	0.0141495
GOTERM_BP_DIRECT	GO:0060070~canonical Wnt signaling pathway	19	1.23537	0.0001833	WNT10B, WNT10A, WNT3A, SIAH2, LEF1, WNT5A, FZD9, FZD10, WNT9A, WNT16, KLF4, DKK1, FGF2, EDNRA, WNT11, LATS2, RSPO2, RSPO3, WNT4	1299	108	20094	2.72137	0.598354	0.0147113	0.0143092
GOTERM_BP_DIRECT	GO:0060021~palate development	16	1.04031	0.000188318	OSR2, PDGFRA, MEF2C, TGFB3, OSR1, COL11A2, WFIKKN2, ARID5B, INHBA, TGFBR3, WNT11, HAND2, SNAI2, GAS1, ALX1, MSX1	1299	81	20094	3.05557	0.608261	0.0148741	0.0144676
GOTERM_BP_DIRECT	GO:0001974~blood vessel remodeling	12	0.780234	0.000192362	TGFBR3, TGFB2, EDNRA, MEF2C, JAG1, AXL, ELN, BGN, RSPO3, AHR, NOL3, ADRA1B	1299	48	20094	3.86721	0.616066	0.0149562	0.0145474
GOTERM_BP_DIRECT	GO:0030216~keratinocyte differentiation	15	0.975293	0.000208299	CERS3, ANXA1, WNT5A, KRT10, WNT16, EVPL, TGM1, PPP3CA, MAFB, LATS2, KRT14, TXNIP, MADCAM1, SFN, SPRR1A	1299	73	20094	3.17853	0.645342	0.0159461	0.0155102
GOTERM_BP_DIRECT	GO:0030335~positive regulation of cell migration	34	2.21066	0.000212027	SEMA5A, LRRC15, LEF1, TWIST2, CLDN1, EGFR, AQP1, PPP3CA, WNT11, NTF3, CTSH, SEMA6B, PDGFRA, SEMA4A, TGFB2, SPHK1, CAV1, MMP2, SEMA4F, PRKCA, MMP9, ADRA2A, COL1A1, SH3RF2, DAB2, CPEB1, MMP14, BMP2, PLP1, CDH13, SNAI2, F2RL1, HPSE, LGR6	1299	264	20094	1.9922	0.651863	0.0159856	0.0155487
GOTERM_BP_DIRECT	GO:0010976~positive regulation of neuron projection development	26	1.69051	0.000221264	NLGN1, SERPINE2, NRXN1, STMN2, HSPB1, NDNF, PTN, CXCL5, RELN, TNN, CREB3L2, NTRK2, CAMK1D, PLK5, NEGR1, DYNLT1C, BCL11A, SPHK1, WNT5A, MAGI2, P3H1, NGF, ADCYAP1, CPEB1, CAMK1, S100A9	1299	179	20094	2.24687	0.667505	0.016433	0.0159838
GOTERM_BP_DIRECT	GO:0030514~negative regulation of BMP signaling pathway	13	0.845254	0.000234808	TMPRSS6, CAV1, NOG, WNT5A, HTRA1, CHRD, CHRDL2, DKK1, GREM1, GREM2, BMPER, NBL1, DAND5	1299	57	20094	3.52798	0.689181	0.0171824	0.0167128
GOTERM_BP_DIRECT	GO:2000311~regulation of AMPA receptor activity	8	0.520156	0.00024026	NLGN3, NLGN1, MEF2C, NRXN1, GSG1L, CNIH2, CACNG4, SHANK1	1299	21	20094	5.89288	0.697501	0.0173266	0.016853
GOTERM_BP_DIRECT	GO:0042127~regulation of cell proliferation	29	1.88557	0.000270435	CEBPA, PID1, SPARC, PTGER2, TNC, PRDM1, NR3C1, NDRG1, CLU, EGFR, CNN2, IER5, S100A11, TGFB2, JAG1, ANXA1, STAT1, TGFB3, AMBN, ADAM33, KLF4, TGFBR2, NFKBIA, NR5A2, BCL6, TRNP1, TXNIP, FAS, PF4	1299	213	20094	2.10608	0.739685	0.019039	0.0185187
GOTERM_BP_DIRECT	GO:0042493~response to drug	39	2.53576	0.000271658	OXTR, NNMT, SLC1A1, TNFRSF11B, GSTT1, HTR2A, PTN, SLC6A2, NPAS2, GRIN2A, LGALS1, TIMP2, APOD, NCAM1, PPARGC1A, S100A10, ABCG5, EMX2, TGFB2, ANXA1, STAT1, ITGA2, MMP2, TRP73, NFATC2, INHBA, GABRG3, MMP9, TGFBR2, P2RX7, COL1A1, LOX, SST, DPYD, PDE3A, LCN2, TXNIP, PAM, CCNO	1299	324	20094	1.86199	0.741266	0.019039	0.0185187
GOTERM_BP_DIRECT	GO:0008283~cell proliferation	41	2.6658	0.000284754	CEBPA, ENPEP, BTG1, HPSE2, FLT3, TWIST2, CHRD, PTH1R, NR2E3, FGF2, EGFR, IL11RA1, OSR2, WNT10B, CD74, CDKN2C, WNT3A, CAV2, STAT1, TGFB3, ITGA2, SPHK1, CAV1, NOG, WNT5A, PAX3, PRKCA, SMARCA2, RUNX2, PAX1, TGFBR3, BTC, BCL6, NFIB, TLX1, ALDH1A2, MAB21L2, CD9, GAS1, CSPG4, YPEL5	1299	348	20094	1.82248	0.757593	0.0196796	0.0191418
GOTERM_BP_DIRECT	GO:0045893~positive regulation of transcription, DNA-templated	71	4.61638	0.000296872	CDKN1C, FANK1, EHF, TGFB1I1, RORC, SCX, CHD3, AHR, FGF2, ETS2, FGF7, SOX18, CREB3L2, MYOG, NCOA1, OSR2, MEF2C, TESC, WNT5A, EBF1, TRP73, TFEB, PAX3, EBF3, SOX10, RUNX3, RUNX2, RUNX1, GREM1, AR, NR5A2, HAND2, TRIM16, AGTR2, ATF5, CEBPA, LEF1, GLIS1, EGFR, NPAS2, SERTAD3, WNT11, SERTAD1, HAS3, ALX1, PPARGC1A, WNT4, CD74, EGR1, AFAP1L2, WNT3A, TGFB3, STAT1, IRX6, FOXJ2, SMAD9, NFATC2, NFATC1, INHBA,…	1299	712	20094	1.54254	0.771782	0.0202361	0.019683
GOTERM_BP_DIRECT	GO:0030282~bone mineralization	13	0.845254	0.000329774	ALOX15, LTBP3, PTN, PTH1R, DNM3OS, ASPN, PTHLH, BMP2, COL1A2, WNT11, LOX, RSPO2, ALPL	1299	59	20094	3.40838	0.806258	0.0218794	0.0212814
GOTERM_BP_DIRECT	GO:0007266~Rho protein signal transduction	13	0.845254	0.000329774	ARHGDIG, ADRB1, NRADD, AGTR1A, EPS8, EDNRA, COL1A2, BCL6, CDC42EP5, ARHGDIB, CDC42EP3, CDC42EP2, CDH13	1299	59	20094	3.40838	0.806258	0.0218794	0.0212814
GOTERM_BP_DIRECT	GO:1905606~regulation of presynapse assembly	10	0.650195	0.00036524	PTPRD, LRFN5, WNT3A, LRRTM1, NRXN1, IL1RAPL1, SLITRK3, IL1RAP, MDGA2, LRRC4B	1299	36	20094	4.2969	0.837612	0.023603	0.0229579
GOTERM_BP_DIRECT	GO:0001958~endochondral ossification	10	0.650195	0.00036524	CSGALNACT1, COL1A1, MMP14, MEF2C, NAB2, SCX, ALPL, BMP6, RUNX2, PTHLH	1299	36	20094	4.2969	0.837612	0.023603	0.0229579
GOTERM_BP_DIRECT	GO:0001935~endothelial cell proliferation	9	0.585176	0.000374679	FGF7, CALCA, MMP14, CAV2, CAV1, PROK2, VSTM4, FGF2, LOXL2	1299	29	20094	4.80067	0.845065	0.0239026	0.0232493
GOTERM_BP_DIRECT	GO:0001525~angiogenesis	35	2.27568	0.000382393	NRP2, ENPEP, NRXN1, NDNF, THY1, HIF3A, FGF2, TMEM100, ESM1, EDNRA, SRPX2, SOX18, GJA5, LEPR, PROK2, RSPO3, SEMA4A, ANGPT1, ANXA2, CAV1, MMP2, PRKCA, TBX4, ARHGAP24, EFNA1, GREM1, TGFBR3, MMP14, HAND2, COL8A2, COL8A1, ACKR3, CSPG4, RAMP1, SCG2	1299	284	20094	1.90637	0.850902	0.0240859	0.0234276
epithelial to mesenchymal transition	GO:0001837~epithelial to mesenchymal transition	11	0.715215	0.000401362	TGFBR3, TGFB2, BMP2, WNT11, NOG, LEF1, SNAI2, NFATC1, MSX1, LOXL2, WNT4	1299	44	20094	3.86721	0.864336	0.0246565	0.0239826
GOTERM_BP_DIRECT	GO:0001662~behavioral fear response	11	0.715215	0.000401362	ADCYAP1, BRINP1, GRM7, GNG7, NPY2R, PENK, SLC1A1, LYPD1, HTR1A, ATP1A2, GRIN2B	1299	44	20094	3.86721	0.864336	0.0246565	0.0239826
GOTERM_BP_DIRECT	GO:0032570~response to progesterone	10	0.650195	0.000455255	NCOA1, TGFB2, GABRB1, GJB2, OXTR, TGFB3, PTGER2, CAV1, TXNIP, PTN	1299	37	20094	4.18076	0.896259	0.0272933	0.0265474
GOTERM_BP_DIRECT	GO:0035115~embryonic forelimb morphogenesis	10	0.650195	0.000455255	OSR2, ALDH1A2, OSR1, SHOX2, RSPO2, EN1, CACNA1C, MSX1, WNT9A, RUNX2	1299	37	20094	4.18076	0.896259	0.0272933	0.0265474
GOTERM_BP_DIRECT	GO:0007214~gamma-aminobutyric acid signaling pathway	9	0.585176	0.000482243	GABRA2, GABBR2, GABRA1, GABRB1, PLCL1, GABRA4, HTR1A, PHF24, GABRG3	1299	30	20094	4.64065	0.909302	0.0284813	0.0277029
GOTERM_BP_DIRECT	GO:0007616~long-term memory	11	0.715215	0.000486518	NTRK2, EGR1, CALB1, RELN, CAMK2N1, LCN2, TAC1, SGK1, ADCY8, SHANK1, NFATC4	1299	45	20094	3.78127	0.911212	0.0284813	0.0277029
GOTERM_BP_DIRECT	GO:0071805~potassium ion transmembrane transport	19	1.23537	0.000504539	KCNH3, KCNIP2, KCNB1, KCNE4, KCNIP3, KCNB2, KCNA4, ATP1A2, KCNA5, KCNA6, KCNV1, KCNU1, KCNS2, KCNS3, KCNMA1, SLC9A9, KCNQ5, KCNK2, KCNJ2	1299	117	20094	2.51203	0.918831	0.0291929	0.028395
GOTERM_BP_DIRECT	GO:0043410~positive regulation of MAPK cascade	26	1.69051	0.000553398	TRIM12C, ADRB2, ADRA1B, FGF2, C1QTNF2, C1QTNF1, LEPR, ADORA1, TIMP2, CD74, NTRK2, GPR37, GADD45B, EPHA8, CAV2, TGFB3, IGFBP3, TRP73, SORBS3, ADRA2A, EFNA1, P2RX7, AR, BMP2, CSPG4, TRIM12A	1299	190	20094	2.11679	0.936357	0.031205	0.0303521
GOTERM_BP_DIRECT	GO:0007611~learning or memory	15	0.975293	0.000557055	PRNP, EGR1, MEF2C, MME, THRA, SLC1A1, FZD9, PRKCA, S100B, DKK1, GRIN2B, EGFR, GRIN2A, PRKAR1B, NCAM1	1299	80	20094	2.9004	0.937506	0.031205	0.0303521
GOTERM_BP_DIRECT	GO:1901216~positive regulation of neuron death	12	0.780234	0.00057067	PRNP, C1QA, EGR1, PPP1R13B, WNT5A, DDIT4, LCN2, ADORA1, TAC1, DKK1, CLU, GRIN2B	1299	54	20094	3.43752	0.941602	0.031205	0.0303521
GOTERM_BP_DIRECT	GO:0048705~skeletal system morphogenesis	12	0.780234	0.00057067	P2RX7, COL1A1, PDGFRA, HHIP, MMP2, COL11A2, ARID5B, TBX4, RUNX2, HOXD8, RFLNA, RAB33B	1299	54	20094	3.43752	0.941602	0.031205	0.0303521
GOTERM_BP_DIRECT	GO:0045600~positive regulation of fat cell differentiation	12	0.780234	0.00057067	CDS1, CEBPA, ZFP36, BMP2, SULT1E1, WIF1, RARRES2, SNAI2, HTR2A, CCDC3, AAMDC, DACT1	1299	54	20094	3.43752	0.941602	0.031205	0.0303521
GOTERM_BP_DIRECT	GO:0050729~positive regulation of inflammatory response	17	1.10533	0.000583226	PTGER4, CEBPA, ITGA2, WNT5A, GPR4, PRKCA, NMI, CTSS, EGFR, NFKBIA, EDNRA, LGALS1, TNIP1, CAMK2N1, TRPV4, S100A9, S100A8	1299	99	20094	2.65626	0.945141	0.0313608	0.0305037
GOTERM_BP_DIRECT	GO:0010811~positive regulation of cell-substrate adhesion	11	0.715215	0.000586125	SMOC2, COL26A1, EGFL6, NPY, ABI3BP, NPY2R, ALOX15, COL8A1, NDNF, PTN, FBLN2	1299	46	20094	3.69907	0.945927	0.0313608	0.0305037
GOTERM_BP_DIRECT	GO:0051932~synaptic transmission, GABAergic	8	0.520156	0.000602706	GABRA2, GABBR2, GABRA1, GABRA4, SLITRK3, RAC3, GRIK1, GABRG3	1299	24	20094	5.15627	0.950211	0.031436	0.0305768
GOTERM_BP_DIRECT	GO:0032331~negative regulation of chondrocyte differentiation	8	0.520156	0.000602706	GREM1, EFEMP1, CHADL, SNAI2, LTBP3, WNT9A, PTHLH, ADAMTS7	1299	24	20094	5.15627	0.950211	0.031436	0.0305768
GOTERM_BP_DIRECT	GO:0051966~regulation of synaptic transmission, glutamatergic	9	0.585176	0.000613523	NLGN3, GRIA2, MEF2C, SERPINE2, GRM7, FRRS1L, LRRK2, GRM8, DKK1	1299	31	20094	4.49095	0.952822	0.031436	0.0305768
GOTERM_BP_DIRECT	GO:0030326~embryonic limb morphogenesis	13	0.845254	0.000619117	TGFB2, LEF1, SHOX2, WNT5A, EN1, DKK1, TBX4, GREM1, CYP26B1, ALDH1A2, GJA5, ALX1, MSX1	1299	63	20094	3.19198	0.954118	0.031436	0.0305768
GOTERM_BP_DIRECT	GO:0048856~anatomical structure development	13	0.845254	0.000619117	SPARC, EYA4, PAX3, WNT9A, NR2E3, PAX1, ZEB2, ATXN1, WIF1, PAX9, SPARCL1, RXRG, WNT4	1299	63	20094	3.19198	0.954118	0.031436	0.0305768
GOTERM_BP_DIRECT	GO:0007267~cell-cell signaling	15	0.975293	0.000634104	WNT10B, WNT10A, WNT3A, WNT5A, THY1, ADRA1B, GREM1, GJC3, GJB2, WNT11, GJC2, GJA5, GJB6, GJA4, WNT4	1299	81	20094	2.8646	0.957417	0.0318717	0.0310007
GOTERM_BP_DIRECT	GO:0009968~negative regulation of signal transduction	12	0.780234	0.000672296	RGS5, RIPOR2, MPIG6B, SOCS1, CAV1, HHIP, DDIT4, DDIT4L, PMEPA1, RGS7BP, LDLRAD4, RGS6	1299	55	20094	3.37502	0.964792	0.0331222	0.0322169
GOTERM_BP_DIRECT	GO:0030178~negative regulation of Wnt signaling pathway	12	0.780234	0.000672296	DKK4, WIF1, NOTUM, APCDD1, DKK1, HIC1, NKD1, DKK2, NKD2, DACT1, NFATC4, DKK3	1299	55	20094	3.37502	0.964792	0.0331222	0.0322169
GOTERM_BP_DIRECT	GO:0086091~regulation of heart rate by cardiac conduction	10	0.650195	0.000690095	KCNE4, CACNA2D1, CAV1, GJA5, KCNE1L, KCNA5, CACNA1C, SCN3B, KCNJ2, CACNA1G	1299	39	20094	3.96636	0.967778	0.033339	0.0324278
GOTERM_BP_DIRECT	GO:0098742~cell-cell adhesion via plasma-membrane adhesion molecules	10	0.650195	0.000690095	MPZ, CDH10, CDH12, CDH13, UNC5D, CDH26, CDH18, CD177, CDH19, ADGRL3	1299	39	20094	3.96636	0.967778	0.033339	0.0324278
GOTERM_BP_DIRECT	GO:0048812~neuron projection morphogenesis	15	0.975293	0.000719995	KIRREL3, NLGN1, DYNLT1C, LRRK2, NRK, NRXN1, WNT5A, NGF, CLU, EGFR, DCLK1, NTF3, EPB41L3, SGK1, NBL1	1299	82	20094	2.82966	0.972235	0.034449	0.0335075
GOTERM_BP_DIRECT	GO:0060079~excitatory postsynaptic potential	10	0.650195	0.000840041	NLGN3, PPP3CA, GRIN2A, MEF2C, ATXN1, LRRK2, ADORA1, GRIK1, ADRB2, GRIN2B	1299	40	20094	3.86721	0.984729	0.03981	0.0387219
GOTERM_BP_DIRECT	GO:0008284~positive regulation of cell proliferation	63	4.09623	0.000918615	CNTFR, THRB, HPSE2, TNC, SCX, PTH1R, HTR2A, CLU, FGF2, LGALS3, ESM1, EDNRA, FGF7, EFEMP1, ENPP2, PROK2, CTSH, PDGFRA, OSR2, SPHK1, WNT5A, NOG, PAX3, EMP2, AVPR1A, NGF, AGTR1A, RUNX2, TGFBR3, BTC, GREM1, HCK, AR, ADCYAP1, ALDH1A2, TRAF5, GAS1, AGTR2, PTGER4, LEF1, ADRB2, PTN, PTHLH, EGFR, NPY, NTF3, FGF20, IL11RA1, CBX8, WNT10B, NTRK2, TGFB2, WNT3A, TGFB3, STAT1, S100B, SMARCA2, CLCF1, TLX1, MAB21…	1299	640	20094	1.52271	0.989674	0.0428294	0.0416589
GOTERM_BP_DIRECT	GO:0048251~elastic fiber assembly	6	0.390117	0.000926965	MFAP4, COL3A1, EFEMP2, LOX, LTBP3, FBLN5	1299	13	20094	7.13946	0.990095	0.0428294	0.0416589
GOTERM_BP_DIRECT	GO:0009190~cyclic nucleotide biosynthetic process	7	0.455137	0.000938185	GUCY1A1, GUCY2E, GUCY1B1, NPR2, ADCY2, ADCY8, ADCY5	1299	19	20094	5.69904	0.990633	0.0428294	0.0416589
GOTERM_BP_DIRECT	GO:0019229~regulation of vasoconstriction	7	0.455137	0.000938185	HTR1A, ATP1A2, KCNA5, CACNA1C, ADRA1B, AGTR1A, ADRA2A	1299	19	20094	5.69904	0.990633	0.0428294	0.0416589
GOTERM_BP_DIRECT	GO:0016339~calcium-dependent cell-cell adhesion via plasma membrane cell adhesion molecules	9	0.585176	0.000962226	NLGN1, CDH10, NRXN1, PCDHB16, CDH12, CDH13, PCDH18, CDH18, CDH19	1299	33	20094	4.21877	0.99169	0.0435276	0.042338
GOTERM_BP_DIRECT	GO:0008217~regulation of blood pressure	15	0.975293	0.00103887	ENPEP, GUCY1A1, LVRN, NPR3, ATP1A2, CACNA1C, AHR, AVPR1A, ADRA1B, TRHDE, AGTR1A, EDNRA, COL1A2, NPY, TAC1	1299	85	20094	2.72979	0.994328	0.0465715	0.0452987
GOTERM_BP_DIRECT	GO:0043066~negative regulation of apoptotic process	64	4.16125	0.00107833	FANK1, HHIP, APIP, SLC40A1, FHL2, SCX, NR3C1, CLU, AQP1, PTMS, RNF157, LGALS3, EDNRA, MPZ, ADORA1, PROK2, CTSH, IER3, CAMK1D, OSR1, SPHK1, WNT5A, TEX11, SOX10, DKK1, MMP9, ADAMTS20, BTC, GREM1, HCK, HAND2, GAS1, SGK1, ATF5, CD44, LEF1, TWIST2, AGAP2, NOL3, FSTL1, EGFR, CKMT1, WNT11, UCP2, MSX1, AAMDC, CD74, PRNP, TGFB2, ANGPT1, BCL11B, PLK2, SIAH2, SH3RF2, DAB2, PINK1, NR4A3, BCL6, AGO4, AXL, IL2…	1299	657	20094	1.50686	0.99534	0.0476203	0.0463188
GOTERM_BP_DIRECT	GO:2000300~regulation of synaptic vesicle exocytosis	14	0.910273	0.00108141	RAB3A, CHRNA5, LRRK2, HTR1A, HTR1B, PRKCA, ADRB2, HTR2A, ADRA2A, GRM7, GRM8, CSPG5, APBA1, PPFIA2	1299	76	20094	2.84952	0.995411	0.0476203	0.0463188
GOTERM_BP_DIRECT	GO:0031175~neuron projection development	24	1.56047	0.00115845	LINGO1, NLGN1, NEGR1, EPHA8, NRXN1, STMN2, TNC, NGF, RUNX3, GPRIN3, GPRIN2, ADCYAP1, EDNRA, PALLD, NPY, PLP1, TBC1D24, RAC3, NRTN, NCAM1, VIM, CNTN4, CD44, MATN2	1299	178	20094	2.08568	0.996873	0.0505219	0.0491411
GOTERM_BP_DIRECT	GO:0010862~positive regulation of pathway-restricted SMAD protein phosphorylation	11	0.715215	0.00116764	GDF10, BMP3, TGFB2, DAB2, BMP2, TGFB3, INHBA, LGALS9, BMP6, TGFBR2, GDF7	1299	50	20094	3.40314	0.997013	0.0505219	0.0491411
GOTERM_BP_DIRECT	GO:0043278~response to morphine	9	0.585176	0.00118791	GHR, EDNRA, MAP1LC3A, PPP1R1B, PENK, SLC1A1, TACR3, TAC1, ADRA1B	1299	34	20094	4.09469	0.9973	0.0505219	0.0491411
GOTERM_BP_DIRECT	GO:0019933~cAMP-mediated signaling	9	0.585176	0.00118791	EPHA5, ADCYAP1, GAL, ADGRG6, PDE3A, ADCY2, AHR, PDE7B, ADCY8	1299	34	20094	4.09469	0.9973	0.0505219	0.0491411
GOTERM_BP_DIRECT	GO:0008543~fibroblast growth factor receptor signaling pathway	12	0.780234	0.00124112	KL, FGF7, FLRT2, WNT5A, NOG, FLRT1, FGF20, CHRD, FAT4, FGFR4, FGF2, WNT4	1299	59	20094	3.1462	0.997929	0.0523374	0.0509069
GOTERM_BP_DIRECT	GO:0035640~exploration behavior	7	0.455137	0.00126758	BRINP1, LRRK2, LRRTM1, NOG, CHRD, HTR1A, AGTR2	1299	20	20094	5.41409	0.998185	0.0530041	0.0515554
GOTERM_BP_DIRECT	GO:0010936~negative regulation of macrophage cytokine production	6	0.390117	0.00136562	TGFB2, NLRX1, TGFB3, AXL, TWIST2, IRAK3	1299	14	20094	6.6295	0.998886	0.055411	0.0538965
GOTERM_BP_DIRECT	GO:0003214~cardiac left ventricle morphogenesis	6	0.390117	0.00136562	TGFB2, NPY2R, HEY2, CPE, AHR, TGFBR2	1299	14	20094	6.6295	0.998886	0.055411	0.0538965
GOTERM_BP_DIRECT	GO:0007157~heterophilic cell-cell adhesion via plasma membrane cell adhesion molecules	11	0.715215	0.00136968	PTPRD, COLEC10, NLGN1, CADM3, LGALS1, ALCAM, NRXN1, IL1RAPL1, FAT4, LGALS9, LGALS7	1299	51	20094	3.33641	0.998909	0.055411	0.0538965
GOTERM_BP_DIRECT	GO:0048706~embryonic skeletal system development	11	0.715215	0.00136968	COL1A1, EDNRA, WNT11, DMRT2, HOXD1, HAND2, WNT5A, NOG, SCX, GAS1, PCSK5	1299	51	20094	3.33641	0.998909	0.055411	0.0538965
GOTERM_BP_DIRECT	GO:0035556~intracellular signal transduction	47	3.05592	0.0013849	GUCY2E, NLRX1, GUCY1B1, DGKB, NRK, NPR2, LRRK2, HSPB1, NOD1, ADCY2, ADCY8, EGFR, ADCY5, NRGN, RPS6KA4, NRBP2, ZFP36, DEPTOR, RAB40B, SOCS1, BLNK, STK32B, GPR155, TNS2, RGS6, GUCY1A1, STAC, PLCL1, NFAM1, DCLK3, NFATC1, IRAK3, PRKCA, LAX1, DCLK1, TGFBR3, ZAP70, PINK1, LATS2, RASA4, PPP1R1B, ASB9, PRKCQ, CSPG4, AGTR2, SGK1, SCG2	1299	450	20094	1.61563	0.998988	0.0555748	0.0540558
GOTERM_BP_DIRECT	GO:0033674~positive regulation of kinase activity	13	0.845254	0.00143104	EPHA5, EPHB6, PDGFRA, NTRK2, CD74, FLT3, EPHA8, INSRR, HTR2A, MST1R, EGFR, AXL, FGFR4	1299	69	20094	2.91442	0.999196	0.0569667	0.0554097
GOTERM_BP_DIRECT	GO:0035904~aorta development	9	0.585176	0.00145384	ROBO2, EDNRA, COL3A1, EFEMP2, LOX, PRICKLE1, PRDM1, LTBP1, LOXL1	1299	35	20094	3.9777	0.999282	0.0570086	0.0554505
GOTERM_BP_DIRECT	GO:0045664~regulation of neuron differentiation	10	0.650195	0.001455	NLGN1, EFNA3, RELN, BCL11B, NTF3, TIMP2, FGF20, ATN1, NREP, NGF	1299	43	20094	3.5974	0.999287	0.0570086	0.0554505
GOTERM_BP_DIRECT	GO:0032355~response to estradiol	18	1.17035	0.00150768	FOXA1, NCOA1, GGT7, POSTN, OXTR, ANXA1, HPGD, TACR3, PRKCA, PTN, FOSL2, GHR, COL1A1, GJB2, ALDH1A2, PENK, TXNIP, PAM	1299	118	20094	2.35965	0.999451	0.0586112	0.0570093
GOTERM_BP_DIRECT	GO:0050808~synapse organization	13	0.845254	0.00162751	NLGN3, C1QA, NLGN1, SLC1A1, CHRD, ELFN1, DRP2, LRRTM4, PALLD, LRRTM1, PPFIA2, DACT1, ADGRL3	1299	70	20094	2.87278	0.999698	0.0627789	0.0610631
GOTERM_BP_DIRECT	GO:0006929~substrate-dependent cell migration	5	0.325098	0.00167871	EPHA8, ITGA2, ITGA11, SNAI2, CSPG4	1299	9	20094	8.59379	0.999766	0.064256	0.0624998
GOTERM_BP_DIRECT	GO:0098609~cell-cell adhesion	26	1.69051	0.00177848	LAMA3, THY1, RAP1GAP, EGFR, LGALS1, SRPX2, BOC, CTNNA2, CDH26, KIRREL3, NEGR1, ITGA2, DSG1B, DSG1A, DLG2, CDH10, ITGA11, ITGA8, CDH12, CDH13, PKP1, DSG3, FAT4, CD200, DSC3, ASTN1	1299	206	20094	1.95238	0.999858	0.0675551	0.0657087
GOTERM_BP_DIRECT	GO:0043065~positive regulation of apoptotic process	41	2.6658	0.00186327	FOXA1, FANK1, HPGD, HTRA4, HTRA1, ADRB1, ADRB2, PTN, CLU, GRIN2A, WNT11, LGALS1, SCIN, CALHM2, NCOA1, WNT10B, TGFB2, CAMK1D, ANXA1, GADD45B, TGFB3, IGFBP3, MMP2, FZD9, TRP73, UNC5C, S100B, MMP9, NFATC4, P2RX7, NELL1, BMP2, GAL, LATS2, BCL6, ALDH1A2, KCNMA1, EEF1A2, LCN2, TXNIP, FAS	1299	383	20094	1.65593	0.999907	0.0702398	0.06832
GOTERM_BP_DIRECT	GO:0032963~collagen metabolic process	6	0.390117	0.0019402	TGFBR3, P2RX7, COL1A2, P3H1, P3H3, TNS2	1299	15	20094	6.18753	0.999936	0.0720479	0.0700787
GOTERM_BP_DIRECT	GO:0033173~calcineurin-NFAT signaling cascade	6	0.390117	0.0019402	PPP3CA, PPP3CC, ADGRB2, NFATC2, NFATC1, NFATC4	1299	15	20094	6.18753	0.999936	0.0720479	0.0700787
GOTERM_BP_DIRECT	GO:0035987~endodermal cell differentiation	8	0.520156	0.00204646	MMP14, MMP2, COL12A1, COL6A1, LAMA3, COL8A1, INHBA, MMP9	1299	29	20094	4.26726	0.999963	0.0754311	0.0733695
GOTERM_BP_DIRECT	GO:0001822~kidney development	23	1.49545	0.00208745	CDKN1C, TGFB2, MME, HPGD, ANXA4, WNT5A, TRP73, ARID5B, PRDM1, CYS1, PCSK5, BMP6, AGTR1A, BICC1, DCN, CYP26B1, WNT11, ALDH1A2, ITGA8, FAT4, TNS2, FBN1, WNT4	1299	175	20094	2.03305	0.99997	0.0763761	0.0742886
GOTERM_BP_DIRECT	GO:0007154~cell communication	9	0.585176	0.00212614	GJB2, GJC3, JAG1, GJC2, ITGB4, GJA5, GJB6, GJA4, ENPP5	1299	37	20094	3.76269	0.999975	0.0770447	0.074939
GOTERM_BP_DIRECT	GO:0045786~negative regulation of cell cycle	11	0.715215	0.00215186	ADCYAP1, CEBPA, BMP2, BRINP1, PPP1R13B, HPGD, CAMK2N1, GMNC, INHBA, BRINP3, RUNX3	1299	54	20094	3.15106	0.999978	0.0770447	0.074939
GOTERM_BP_DIRECT	GO:0008544~epidermis development	12	0.780234	0.0021566	KRTDAP, CERS3, PPP3CA, PTCH2, NTF3, SVEP1, KRT10, GRHL1, KLF4, EVPL, ZFP750, EGFR	1299	63	20094	2.94644	0.999978	0.0770447	0.074939
GOTERM_BP_DIRECT	GO:0050966~detection of mechanical stimulus involved in sensory perception of pain	7	0.455137	0.00218314	CHRNA5, ITGA2, GRM8, PHF24, HTR2A, ASIC3, GRIN2B	1299	22	20094	4.9219	0.999981	0.0770447	0.074939
GOTERM_BP_DIRECT	GO:0010463~mesenchymal cell proliferation	7	0.455137	0.00218314	FGF7, WNT11, HAND2, WNT5A, SHOX2, MSX1, TBX18	1299	22	20094	4.9219	0.999981	0.0770447	0.074939
GOTERM_BP_DIRECT	GO:0001764~neuron migration	21	1.36541	0.00221389	KIRREL3, NTRK2, EMX2, NRP2, MEF2C, NDNF, GFRA3, DCLK1, COL3A1, TUBB2A, RELN, AXL, TNN, DDIT4, TRIM46, SPOCK1, MDGA2, ASTN2, ASTN1, MATN2, ADGRL3	1299	154	20094	2.10938	0.999984	0.0775796	0.0754593
GOTERM_BP_DIRECT	GO:0030855~epithelial cell differentiation	16	1.04031	0.002269	WNT10B, EHF, UPK2, ANXA4, TGFB1I1, KRT23, KRT10, WNT9A, PTHLH, GDF7, LGALS3, BDH2, NR5A2, KRT17, KRT15, KRT14	1299	102	20094	2.42648	0.999988	0.0789549	0.0767969
GOTERM_BP_DIRECT	GO:0006915~apoptotic process	62	4.03121	0.00232008	PPP1R13B, APIP, SLC40A1, AATK, HIF3A, LSP1, LGALS1, EVA1A, ZFP385B, LGALS7, MEF2C, IGFBP3, APLP1, TEX11, TRP73, IRAK3, PRKCA, UNC5C, UNC5D, MMP9, TGFBR2, ADAMTS20, EDAR, BTC, GREM1, IFI27, HAND2, TRAF5, DDIT4, CHIL1, GAS1, SGK1, S100A9, S100A8, AGAP2, ADRB1, TNFRSF11B, NOD1, NRADD, FHIT, NHLH2, WNT11, DRAM1, EPB41L3, S100A14, GSN, GADD45B, BCL11B, DNASE2A, KCNIP3, SIAH2, CIDEA, G0S2, DAB2, DAP, T…	1299	652	20094	1.47096	0.99999	0.0801718	0.0779806
GOTERM_BP_DIRECT	GO:0060412~ventricular septum morphogenesis	10	0.650195	0.00238842	ROBO2, TGFBR3, TGFB2, WNT11, GJA5, NOG, HEY2, NFATC1, SLIT3, TGFBR2	1299	46	20094	3.36279	0.999993	0.0819639	0.0797237
GOTERM_BP_DIRECT	GO:0002793~positive regulation of peptide secretion	4	0.260078	0.00243624	NPY2R, ADORA1, S100A9, S100A8	1299	5	20094	12.3751	0.999995	0.0830325	0.0807631
GOTERM_BP_DIRECT	GO:2000463~positive regulation of excitatory postsynaptic potential	9	0.585176	0.00254305	NLGN3, NLGN1, GRIN2A, RELN, PRKAR1B, NRXN1, TBC1D24, GRIN2B, SHANK1	1299	38	20094	3.66367	0.999997	0.0855016	0.0831647
GOTERM_BP_DIRECT	GO:0008219~cell death	9	0.585176	0.00254305	P2RX7, TGFB2, BRINP1, PMP22, CIDEA, EMP1, EMP2, EMP3, HTR2A	1299	38	20094	3.66367	0.999997	0.0855016	0.0831647
GOTERM_BP_DIRECT	GO:0097105~presynaptic membrane assembly	5	0.325098	0.00265533	PTPRD, NLGN3, NLGN1, NRXN1, IL1RAPL1	1299	10	20094	7.73441	0.999998	0.0880861	0.0856786
GOTERM_BP_DIRECT	GO:0050795~regulation of behavior	5	0.325098	0.00265533	RELN, HTR1A, HTR1B, HOXA1, BAIAP3	1299	10	20094	7.73441	0.999998	0.0880861	0.0856786
GOTERM_BP_DIRECT	GO:0048545~response to steroid hormone	7	0.455137	0.00279415	DAB2, OXTR, PAQR7, LOX, SST, ADRA1B, TGFBR2	1299	23	20094	4.7079	0.999999	0.0920776	0.089561
GOTERM_BP_DIRECT	GO:0071773~cellular response to BMP stimulus	9	0.585176	0.00302124	TMEM100, BMP2, TNMD, NOG, SCX, VSTM2A, BMP6, RUNX2, ADAMTS7	1299	39	20094	3.56973	1	0.0988562	0.0961543
GOTERM_BP_DIRECT	GO:0007179~transforming growth factor beta receptor signaling pathway	15	0.975293	0.00306887	TGFB2, HPGD, CAV2, TGFB3, WFIKKN2, SMAD9, LTBP3, LTBP1, TGFBR2, TGFBR3, COL3A1, BMP2, COL1A2, ITGA8, ITGB6	1299	95	20094	2.44245	1	0.0988562	0.0961543
GOTERM_BP_DIRECT	GO:0030900~forebrain development	15	0.975293	0.00306887	DRAXIN, EMX2, PCDH9, NOG, APLP1, TRP73, CHRD, SSTR2, DKK1, DCLK1, RELN, NFIB, ALDH1A2, MSX1, PPARGC1A	1299	95	20094	2.44245	1	0.0988562	0.0961543
GOTERM_BP_DIRECT	GO:0002009~morphogenesis of an epithelium	8	0.520156	0.00307932	KRT17, WNT5A, TNC, PCDH15, KRT10, SOX10, TBX4, KRT6A	1299	31	20094	3.99195	1	0.0988562	0.0961543
GOTERM_BP_DIRECT	GO:0042391~regulation of membrane potential	17	1.10533	0.00320753	GABRA2, KCNH3, GABRP, GABRA1, GABRB1, CHRNA5, LRRK2, GABRA4, KCNA5, GRIK1, SLC1A6, GABRG3, CACNA1G, GRIN2A, KCNMA1, CNIH2, KCNK2	1299	116	20094	2.26698	1	0.102312	0.0995156
GOTERM_BP_DIRECT	GO:0007507~heart development	33	2.14564	0.00330041	NRP2, OXTR, SPARC, CACNA1C, PTN, PCSK5, ACAN, EDNRA, PDLIM2, SOX18, HEY2, MSX1, PDLIM4, MEF2C, TGFB2, OSR1, MMP2, IRX4, PAX3, MICAL2, NFATC1, MMP9, AGTR1A, BICC1, NFATC4, TGFBR2, COL3A1, BMP2, LOX, HAND2, ALDH1A2, PAM, FBN1	1299	298	20094	1.71299	1	0.104604	0.101745
GOTERM_BP_DIRECT	GO:0072089~stem cell proliferation	13	0.845254	0.0033253	OSR2, CDKN2C, SHOX2, WNT5A, PAX3, NFATC1, FGF2, RUNX2, TBX18, WNT11, NFIB, TLX1, SFN	1299	76	20094	2.64598	1	0.104726	0.101864
GOTERM_BP_DIRECT	GO:0060348~bone development	14	0.910273	0.00339423	VKORC1, PTGER4, SPARC, NPR2, BGN, P3H1, SMAD9, PAPSS2, MMP14, BMP2, EPYC, OGN, ITGB6, NOTUM	1299	86	20094	2.51818	1	0.106224	0.103321
GOTERM_BP_DIRECT	GO:0007626~locomotory behavior	17	1.10533	0.00349844	MYO15, NEGR1, SLC1A1, KLHL1, PCDH15, ADCY8, ADRA1B, ADCY5, GRIN2A, CALB1, RELN, LRRTM1, GNG7, PPP1R1B, PENK, APBA1, ASTN1	1299	117	20094	2.24761	1	0.108801	0.105828
GOTERM_BP_DIRECT	GO:0042246~tissue regeneration	7	0.455137	0.00352464	IGSF10, GAP43, GSN, CPQ, APOD, PTN, LGR6	1299	24	20094	4.51174	1	0.108935	0.105958
GOTERM_BP_DIRECT	GO:0086004~regulation of cardiac muscle cell contraction	6	0.390117	0.00358772	FXYD1, PDE4B, ADORA1, ADRB1, ATP1A2, KCNJ2	1299	17	20094	5.45958	1	0.109524	0.106531
GOTERM_BP_DIRECT	GO:0086005~ventricular cardiac muscle cell action potential	6	0.390117	0.00358772	RYR2, KCNE4, GJA5, KCNE1L, SCN3B, SNTA1	1299	17	20094	5.45958	1	0.109524	0.106531
GOTERM_BP_DIRECT	GO:0001934~positive regulation of protein phosphorylation	30	1.95059	0.0036613	PTGER4, FLT3, LRRK2, PTGER3, FGF2, EGFR, FGF7, EDNRA, RELN, LEPR, FGF20, CHGA, CD74, ANGPT1, ANXA2, LRRN3, WNT3A, SPHK1, RARRES2, WNT5A, PRKCA, NGF, MMP9, EFNA1, P2RX7, DAB2, PINK1, BMP2, FAS, FAM20A	1299	264	20094	1.75782	1	0.11034	0.107325
GOTERM_BP_DIRECT	GO:0001666~response to hypoxia	25	1.62549	0.00370508	RYR2, KCNA5, HIF3A, NOL3, LOXL2, EDNRA, UCP2, PENK, ADORA1, EGR1, POSTN, TGFB2, TGFB3, ITGA2, CAV1, MMP2, GRIN2B, FOSL2, TGFBR2, TGFBR3, MMP14, BMP2, KCNMA1, DDIT4, PAM	1299	206	20094	1.87728	1	0.11034	0.107325
GOTERM_BP_DIRECT	GO:0071407~cellular response to organic cyclic compound	13	0.845254	0.00371295	WNT10B, CEBPA, STAT1, LRRK2, SLC1A1, SMAD9, P2RX7, NFKBIA, BMP2, LGALS1, SOCS1, SP5, ALPL	1299	77	20094	2.61162	1	0.11034	0.107325
GOTERM_BP_DIRECT	GO:0051496~positive regulation of stress fiber assembly	11	0.715215	0.00371434	RGCC, WNT11, SDC4, TGFB3, TPM1, PRKCQ, TAC1, PDLIM4, SORBS3, WNT4, S100A10	1299	58	20094	2.93374	1	0.11034	0.107325
GOTERM_BP_DIRECT	GO:0007631~feeding behavior	8	0.520156	0.00372532	MC4R, NTRK2, CALCA, GAL, NEGR1, NPY, HTR1B, HCRTR2	1299	32	20094	3.86721	1	0.11034	0.107325
GOTERM_BP_DIRECT	GO:0032060~bleb assembly	5	0.325098	0.00396061	P2RX7, PMP22, EMP1, EMP2, EMP3	1299	11	20094	7.03128	1	0.114818	0.11168
GOTERM_BP_DIRECT	GO:2001028~positive regulation of endothelial cell chemotaxis	5	0.325098	0.00396061	SEMA5A, SMOC2, HSPB1, SNAI2, FGF2	1299	11	20094	7.03128	1	0.114818	0.11168
GOTERM_BP_DIRECT	GO:0007158~neuron cell-cell adhesion	5	0.325098	0.00396061	NLGN3, NLGN1, NRXN1, ASTN2, ASTN1	1299	11	20094	7.03128	1	0.114818	0.11168
GOTERM_BP_DIRECT	GO:0042475~odontogenesis of dentin-containing tooth	12	0.780234	0.00400067	EDAR, PDGFRA, BMP2, BCL11B, AMBN, HAND2, FST, NFIC, LEF1, TNC, MSX1, RUNX2	1299	68	20094	2.72979	1	0.114818	0.11168
GOTERM_BP_DIRECT	GO:0071300~cellular response to retinoic acid	12	0.780234	0.00400067	COL1A1, MEF2C, CYP26B1, BRINP1, ALDH1A2, TESC, OSR1, TNC, HOXA1, KLF4, BRINP3, AQP1	1299	68	20094	2.72979	1	0.114818	0.11168
GOTERM_BP_DIRECT	GO:0009410~response to xenobiotic stimulus	20	1.30039	0.00401493	EMX2, TGFB2, MMP2, SLC1A1, NFATC2, INHBA, HTR2A, AHR, GABRG3, MMP9, NPAS2, TGFBR2, P2RX7, GRIN2A, DPYD, LCN2, PDE3A, NCAM1, PAM, CFTR	1299	151	20094	2.04885	1	0.114818	0.11168
GOTERM_BP_DIRECT	GO:0007417~central nervous system development	17	1.10533	0.0041455	SEMA6B, EMX2, GSN, GABRA4, NOG, APLP1, CHRD, CAPG, RUNX1, DRP2, ACAN, ZEB2, SCIN, RELN, TLX1, TIMP2, PAM	1299	119	20094	2.20983	1	0.117874	0.114653
GOTERM_BP_DIRECT	GO:0007218~neuropeptide signaling pathway	14	0.910273	0.00458763	CALCA, GPR37, GRP, NTS, SSTR2, HCRTR2, SSTR5, RXFP3, ADCYAP1, GAL, NPY, PENK, PROK2, TAC1	1299	89	20094	2.4333	1	0.128229	0.124725
GOTERM_BP_DIRECT	GO:1902949~positive regulation of tau-protein kinase activity	4	0.260078	0.00463852	EGR1, NAB2, DKK1, CLU	1299	6	20094	10.3125	1	0.128229	0.124725
GOTERM_BP_DIRECT	GO:0046878~positive regulation of saliva secretion	4	0.260078	0.00463852	PPP3CA, ADRB1, TAC1, AQP1	1299	6	20094	10.3125	1	0.128229	0.124725
GOTERM_BP_DIRECT	GO:0072201~negative regulation of mesenchymal cell proliferation	4	0.260078	0.00463852	WNT11, WNT5A, LMNA, PTN	1299	6	20094	10.3125	1	0.128229	0.124725
GOTERM_BP_DIRECT	GO:0097114~NMDA glutamate receptor clustering	4	0.260078	0.00463852	NLGN1, RELN, NRXN1, HTR1A	1299	6	20094	10.3125	1	0.128229	0.124725
GOTERM_BP_DIRECT	GO:0032793~positive regulation of CREB transcription factor activity	6	0.390117	0.00470654	EPHA5, RELN, CAMK1D, CRTC3, ADCY8, CD200	1299	18	20094	5.15627	1	0.12866	0.125144
GOTERM_BP_DIRECT	GO:0071711~basement membrane organization	6	0.390117	0.00470654	MMP11, COL3A1, FLRT2, CAV2, CAV1, PMP22	1299	18	20094	5.15627	1	0.12866	0.125144
GOTERM_BP_DIRECT	GO:0090263~positive regulation of canonical Wnt signaling pathway	16	1.04031	0.00473168	SEMA5A, WNT10B, THRA, WNT3A, LRRK2, CAV1, FZD9, FGF2, DKK2, EGFR, COL1A1, ZEB2, DAAM2, RSPO2, RSPO3, DACT1	1299	110	20094	2.25001	1	0.12866	0.125144
GOTERM_BP_DIRECT	GO:0043588~skin development	11	0.715215	0.00477638	COL1A1, ADAMTS2, COL3A1, WNT10A, BCL11B, COL5A1, COL5A2, PTCH2, SFN, ITGB6, ASPRV1	1299	60	20094	2.83595	1	0.12917	0.12564
GOTERM_BP_DIRECT	GO:0001656~metanephros development	9	0.585176	0.00488279	ROBO2, IRX1, OSR2, TSHZ3, OSR1, ITGA8, CTSH, WNT4, FBN1	1299	42	20094	3.31475	1	0.130628	0.127057
GOTERM_BP_DIRECT	GO:1904707~positive regulation of vascular smooth muscle cell proliferation	9	0.585176	0.00488279	NR4A3, HPGD, MMP2, FOXJ2, HTR1B, MMP9, PPARGC1A, FGF2, AGTR1A	1299	42	20094	3.31475	1	0.130628	0.127057
GOTERM_BP_DIRECT	GO:0050673~epithelial cell proliferation	14	0.910273	0.00505309	EHF, CBX4, TGFB3, NOG, WNT5A, CYP7B1, FGF2, RUNX2, TBX18, EGFR, AR, FGF7, COL8A2, COL8A1	1299	90	20094	2.40626	1	0.134461	0.130786
GOTERM_BP_DIRECT	GO:0070374~positive regulation of ERK1 and ERK2 cascade	27	1.75553	0.00519185	NRXN1, ALOX15, NOD1, HTR2A, FGF2, EGFR, EDNRA, BMPER, GLIPR2, NPY, FGF20, GM10591, CD74, PDGFRA, ANGPT1, CAVIN3, PRKCA, NGF, ADCYAP1, BMP2, TRPV4, HAND2, CHIL1, ACKR3, F2RL1, FGFR4, CD44	1299	235	20094	1.77727	1	0.137418	0.133662
GOTERM_BP_DIRECT	GO:0043524~negative regulation of neuron apoptotic process	23	1.49545	0.00535995	DRAXIN, CNTFR, NTRK2, MEF2C, ANGPT1, TGFB3, SLC1A1, FZD9, TRP73, AGAP2, EN1, NDNF, NGF, NFATC4, NRBP2, PINK1, NR4A3, GRM7, AXL, CLCF1, NTF3, FGF20, PPARGC1A	1299	189	20094	1.88245	1	0.139888	0.136065
GOTERM_BP_DIRECT	GO:0030308~negative regulation of cell growth	18	1.17035	0.00536832	TGFB2, CDKN2C, SERPINE2, RRAD, P3H1, INHBA, SMARCA2, RERG, GREM1, DAB2, SERTAD3, WNT11, SERTAD1, BCL6, GNG4, GAS1, SLIT3, MSX1	1299	133	20094	2.09352	1	0.139888	0.136065
GOTERM_BP_DIRECT	GO:0042474~middle ear morphogenesis	7	0.455137	0.00539762	OSR2, EDNRA, OSR1, EYA4, NOG, GAS1, MSX1	1299	26	20094	4.16468	1	0.139888	0.136065
GOTERM_BP_DIRECT	GO:2000647~negative regulation of stem cell proliferation	7	0.455137	0.00539762	CDKN2C, WNT11, NFIB, SNAI2, NFATC1, SFN, FGF2	1299	26	20094	4.16468	1	0.139888	0.136065
GOTERM_BP_DIRECT	GO:0045109~intermediate filament organization	12	0.780234	0.00560354	KRT80, KRT17, KRT15, KRT1, KRT14, KRT23, VIM, KRT10, KRT5, KRT75, PRPH, KRT6A	1299	71	20094	2.61445	1	0.142453	0.13856
GOTERM_BP_DIRECT	GO:0051592~response to calcium ion	12	0.780234	0.00560354	P2RX7, PPP3CA, RYR2, SPARC, TRPV6, S100A16, CAV1, KCNMA1, PENK, PCDH15, TXNIP, EGFR	1299	71	20094	2.61445	1	0.142453	0.13856
GOTERM_BP_DIRECT	GO:0045666~positive regulation of neuron differentiation	16	1.04031	0.00560407	FOXA1, NCOA1, SH3GL3, MEF2C, MMD2, NGF, BMP6, TLE6, GDF7, BMP2, BRINP1, BCL6, TIMP2, NBL1, BRINP3, RGS6	1299	112	20094	2.20983	1	0.142453	0.13856
GOTERM_BP_DIRECT	GO:0060740~prostate gland epithelium morphogenesis	5	0.325098	0.00563972	FOXA1, AR, MMP2, TNC, CYP7B1	1299	12	20094	6.44534	1	0.142453	0.13856
GOTERM_BP_DIRECT	GO:0042416~dopamine biosynthetic process	5	0.325098	0.00563972	TGFB2, CYP2D22, GPR37, AGTR2, AGTR1A	1299	12	20094	6.44534	1	0.142453	0.13856
GOTERM_BP_DIRECT	GO:0006366~transcription from RNA polymerase II promoter	27	1.75553	0.00579562	EHF, THRA, LEF1, GLIS3, SLC40A1, ADRB2, AHR, HIF3A, FGF2, ATXN1, CYTL1, MSX1, AAMDC, WNT10B, BCL11B, WNT3A, NFATC2, NFATC1, INHBA, NMI, KLF4, SOX10, FOSL2, NFATC4, AR, BMP2, BCL6	1299	237	20094	1.76227	1	0.145651	0.141671
GOTERM_BP_DIRECT	GO:0030512~negative regulation of transforming growth factor beta receptor signaling pathway	14	0.910273	0.00609738	RASL11B, CAV2, TGFB3, CAV1, TGFB1I1, WFIKKN2, CIDEA, HTRA1, LDLRAD4, ASPN, TGFBR3, BMP2, PMEPA1, DAND5	1299	92	20094	2.35395	1	0.151166	0.147035
GOTERM_BP_DIRECT	GO:0050679~positive regulation of epithelial cell proliferation	14	0.910273	0.00609738	OSR2, OSR1, NOG, WNT5A, HTRA1, CYP7B1, FGF2, BMP6, RUNX2, TBX18, EGFR, FGF7, NR4A3, GAS1	1299	92	20094	2.35395	1	0.151166	0.147035
GOTERM_BP_DIRECT	GO:0006355~regulation of transcription, DNA-templated	103	6.69701	0.0061062	FOXA1, EHF, MYT1L, NAB2, RORC, AHR, NR3C1, ETS2, RPS6KA4, EFEMP1, A430033K04RIK, SOX18, CREB3L1, CREB3L2, HOXA1, MEF2C, TLE2, EBF1, TRP73, EBF3, RUNX3, SOX10, RUNX2, TLE6, RUNX1, AR, PRKCQ, ERG, ATF5, HOXD1, SHOX2, FOXO6, AEBP1, ZBTB4, NPAS2, ATXN1, ALX1, PPARGC1A, EGR1, NFATC2, SMAD9, NFATC1, SMARCA1, SMARCA2, POU6F1, FOSL2, NFATC4, BMP2, MAFB, NR4A3, SNAI2, SIM1, HOXD8, THRB, ZFP488, THRA, HIF3…	1299	1237	20094	1.28803	1	0.151166	0.147035
GOTERM_BP_DIRECT	GO:0002053~positive regulation of mesenchymal cell proliferation	8	0.520156	0.00628647	STAT1, WNT5A, SHOX2, CHRD, GAS1, TBX18, TGFBR2, SYNE1	1299	35	20094	3.53573	1	0.154859	0.150626
GOTERM_BP_DIRECT	GO:2001222~regulation of neuron migration	7	0.455137	0.00656721	NTNG1, IGSF10, RELN, FLRT2, UNC5C, CTNNA2, UNC5D	1299	27	20094	4.01044	1	0.160188	0.15581
GOTERM_BP_DIRECT	GO:0010460~positive regulation of heart rate	7	0.455137	0.00656721	RYR2, SLC1A1, HEY2, TACR3, ADRB1, AVPR1A, SCN3B	1299	27	20094	4.01044	1	0.160188	0.15581
GOTERM_BP_DIRECT	GO:0006816~calcium ion transport	19	1.23537	0.00713796	RYR2, CACNA2D1, CAV1, CACNA2D3, ATP2B4, NFATC1, CACNA1C, GRIN2B, P2RX7, PPP3CA, TMEM37, GRIN2A, TRPV6, TRPV4, GJA4, ANXA6, CACHD1, RAMP1, CACNG4	1299	148	20094	1.98586	1	0.173261	0.168525
GOTERM_BP_DIRECT	GO:0045907~positive regulation of vasoconstriction	10	0.650195	0.00726357	CHGA, OXTR, CAV1, GJA5, PTGER3, TBXAS1, HTR2A, AVPR1A, ADRA1B, EGFR	1299	54	20094	2.8646	1	0.175454	0.170659
GOTERM_BP_DIRECT	GO:0050919~negative chemotaxis	8	0.520156	0.00737789	RTN4R, SEMA6B, SEMA4A, NRP2, RTN4RL1, WNT5A, SEMA4F, SLIT3	1299	36	20094	3.43752	1	0.176502	0.171678
GOTERM_BP_DIRECT	GO:0042476~odontogenesis	8	0.520156	0.00737789	OSR2, WNT10A, OSR1, PAX9, GAS1, INHBA, MSX1, PAM	1299	36	20094	3.43752	1	0.176502	0.171678
GOTERM_BP_DIRECT	GO:0050965~detection of temperature stimulus involved in sensory perception of pain	6	0.390117	0.00764731	CALCA, LXN, ADORA1, HTR2A, TAC1, ASIC3	1299	20	20094	4.64065	1	0.17984	0.174925
GOTERM_BP_DIRECT	GO:0008542~visual learning	12	0.780234	0.00767376	NLGN3, GRIN2A, ATXN1, NOG, PPP1R1B, CHRD, ATP1A2, CACNA1C, SGK1, NTS, ADRA1B, RAG1	1299	74	20094	2.50846	1	0.17984	0.174925
GOTERM_BP_DIRECT	GO:0060536~cartilage morphogenesis	4	0.260078	0.00772898	MEF2C, HAND2, SNAI2, MSX1	1299	7	20094	8.83933	1	0.17984	0.174925
GOTERM_BP_DIRECT	GO:0002087~regulation of respiratory gaseous exchange by neurological system process	5	0.325098	0.00773427	NLGN3, NLGN1, TSHZ3, ADORA1, ATP1A2	1299	13	20094	5.94955	1	0.17984	0.174925
GOTERM_BP_DIRECT	GO:0003334~keratinocyte development	5	0.325098	0.00773427	BCL11B, PALLD, SFN, KRT10, FOSL2	1299	13	20094	5.94955	1	0.17984	0.174925
GOTERM_BP_DIRECT	GO:0060394~negative regulation of pathway-restricted SMAD protein phosphorylation	5	0.325098	0.00773427	GREM1, NOG, PMEPA1, LDLRAD4, DKK1	1299	13	20094	5.94955	1	0.17984	0.174925
GOTERM_BP_DIRECT	GO:0071385~cellular response to glucocorticoid stimulus	7	0.455137	0.0079102	ADCYAP1, ZFP36, ANXA1, FLT3, SSTR2, NR3C1, SSTR5	1299	28	20094	3.86721	1	0.183075	0.178071
GOTERM_BP_DIRECT	GO:0050731~positive regulation of peptidyl-tyrosine phosphorylation	16	1.04031	0.00836073	PDGFRA, PRNP, CD74, ANGPT1, CAV2, HTR2A, BMP6, EFNA1, GHR, FGF7, RELN, NTF3, ENPP2, TNFRSF14, CSPG4, CD44	1299	117	20094	2.11539	1	0.192606	0.187342
GOTERM_BP_DIRECT	GO:0048662~negative regulation of smooth muscle cell proliferation	9	0.585176	0.00859574	PTGIR, BMP2, CAV1, IGFBP3, NPR3, OGN, APOD, KLF4, PPARGC1A	1299	46	20094	3.02651	1	0.197108	0.191721
GOTERM_BP_DIRECT	GO:0007160~cell-matrix adhesion	14	0.910273	0.00869807	ITGB4, ITGA2, MSLNL, EMP2, LYPD3, COL3A1, BCL6, TNN, ITGA11, ITGA8, MADCAM1, ITGB6, HPSE, TMEM8B	1299	96	20094	2.25587	1	0.198539	0.193113
GOTERM_BP_DIRECT	GO:0007623~circadian rhythm	14	0.910273	0.00946759	NTRK2, RORC, NGF, CYP7B1, EGFR, NPAS2, PROKR2, DBP, DPYD, KCNMA1, PROK2, PRKG2, FAS, ATF5	1299	97	20094	2.23261	1	0.215118	0.209238
GOTERM_BP_DIRECT	GO:0001508~action potential	6	0.390117	0.00951256	GRIN2A, KCNB1, KCNMB2, KCNMB4, GRIN2B, CACNA1G	1299	21	20094	4.41966	1	0.215157	0.209276
GOTERM_BP_DIRECT	GO:0001701~in utero embryonic development	35	2.27568	0.0101469	PTPRR, TSHZ3, CHRD, HBA-A2, HBA-A1, PTH1R, PRDM1, NRADD, TMEM100, EDNRA, SOX18, MSX1, PDGFRA, FOXD3, ANGPT1, WNT3A, TGFB3, NOG, TPM1, TENT5C, GRIN2B, SOX10, OOEP, RUNX1, TGFBR2, TGFBR3, SLC5A7, AR, DAB2, COL3A1, BMP2, HAND2, APBA1, SEC24D, DSC3	1299	347	20094	1.56026	1	0.227554	0.221335
GOTERM_BP_DIRECT	GO:0090331~negative regulation of platelet aggregation	5	0.325098	0.0102817	C1QTNF1, SERPINE2, PTGER3, CD9, ADRB2	1299	14	20094	5.52458	1	0.227554	0.221335
GOTERM_BP_DIRECT	GO:0060317~cardiac epithelial to mesenchymal transition	5	0.325098	0.0102817	TGFBR3, TGFB2, BMP2, HEY2, WNT16	1299	14	20094	5.52458	1	0.227554	0.221335
GOTERM_BP_DIRECT	GO:0086002~cardiac muscle cell action potential involved in contraction	5	0.325098	0.0102817	CACNA2D1, CACNA1C, SCN3B, KCNJ2, CACNA1G	1299	14	20094	5.52458	1	0.227554	0.221335
GOTERM_BP_DIRECT	GO:0051402~neuron apoptotic process	14	0.910273	0.0102893	DRAXIN, ANGPT1, TGFB3, ATN1, AATK, NGF, AGTR1A, NFATC4, NR4A3, AXL, NTF3, FAS, AGTR2, PPARGC1A	1299	98	20094	2.20983	1	0.227554	0.221335
GOTERM_BP_DIRECT	GO:0003151~outflow tract morphogenesis	10	0.650195	0.0103425	TGFBR3, TGFB2, MEF2C, WNT11, ELN, GJA5, NPY2R, NOG, HEY2, TGFBR2	1299	57	20094	2.71383	1	0.227718	0.221494
GOTERM_BP_DIRECT	GO:0007420~brain development	29	1.88557	0.0104535	ROBO2, HPCA, SLC1A1, AATK, NRADD, AK7, PCDH18, ACAT1, PPP3CA, ATXN1, PPP3CC, RELN, GJC2, NTF3, APOD, EMX2, CADM2, SPHK1, NOG, UNC5C, SMARCA1, DCLK1, TGFBR2, NFIB, DDIT4, ITGA8, CD9, CNTN4, ADGRL3	1299	273	20094	1.64321	1	0.229148	0.222886
GOTERM_BP_DIRECT	GO:0050680~negative regulation of epithelial cell proliferation	13	0.845254	0.0108521	CDKN1C, WNT10B, MEF2C, TGFB2, TGFB3, WNT5A, PTN, RUNX3, TGFBR3, AR, DAB2, DUSP10, GAS1	1299	88	20094	2.28517	1	0.236841	0.230368
GOTERM_BP_DIRECT	GO:0055074~calcium ion homeostasis	9	0.585176	0.0110969	KL, CALB1, TRPV6, CAMK2N1, CAV1, CIB2, ALPL, FAM20A, PTHLH	1299	48	20094	2.9004	1	0.239039	0.232506
GOTERM_BP_DIRECT	GO:0031623~receptor internalization	9	0.585176	0.0110969	DNM3, GRIA2, CALCA, CAV1, LRRTM1, PTGER3, ACKR3, CD9, RAMP1	1299	48	20094	2.9004	1	0.239039	0.232506
GOTERM_BP_DIRECT	GO:0001657~ureteric bud development	9	0.585176	0.0110969	ROBO2, TSHZ3, SDC4, BMPER, GSTA3, OSR1, NOG, SMAD9, SIM1	1299	48	20094	2.9004	1	0.239039	0.232506
GOTERM_BP_DIRECT	GO:0042552~myelination	12	0.780234	0.0113062	GJC3, GAL3ST1, MARVELD1, MPZ, NAB2, MALL, ADGRG6, NTF3, PLP1, PMP22, MAL, MAL2	1299	78	20094	2.37982	1	0.242498	0.23587
GOTERM_BP_DIRECT	GO:0048265~response to pain	6	0.390117	0.0116683	CALCA, RELN, KCNIP3, GJA4, TAC1, SLC6A2	1299	22	20094	4.21877	1	0.243136	0.236491
GOTERM_BP_DIRECT	GO:0010001~glial cell differentiation	6	0.390117	0.0116683	GAP43, RELN, NFIB, PLP1, DTX1, FGF2	1299	22	20094	4.21877	1	0.243136	0.236491
GOTERM_BP_DIRECT	GO:0061312~BMP signaling pathway involved in heart development	4	0.260078	0.0117767	BMP2, NOG, CHRD, MSX1	1299	8	20094	7.73441	1	0.243136	0.236491
GOTERM_BP_DIRECT	GO:0019800~peptide cross-linking via chondroitin 4-sulfate glycosaminoglycan	4	0.260078	0.0117767	SPOCK3, BGN, NDNF, DCN	1299	8	20094	7.73441	1	0.243136	0.236491
GOTERM_BP_DIRECT	GO:0061002~negative regulation of dendritic spine morphogenesis	4	0.260078	0.0117767	NLGN3, EFNA1, DNM3, NLGN1	1299	8	20094	7.73441	1	0.243136	0.236491
GOTERM_BP_DIRECT	GO:0099545~trans-synaptic signaling by trans-synaptic complex	3	0.195059	0.0119711	PTPRD, IL1RAPL1, IL1RAP	1299	3	20094	15.4688	1	0.243136	0.236491
GOTERM_BP_DIRECT	GO:1905686~positive regulation of plasma membrane repair	3	0.195059	0.0119711	ANXA2, AHNAK, S100A10	1299	3	20094	15.4688	1	0.243136	0.236491
GOTERM_BP_DIRECT	GO:2000860~positive regulation of aldosterone secretion	3	0.195059	0.0119711	DAB2, C1QTNF1, BMP6	1299	3	20094	15.4688	1	0.243136	0.236491
GOTERM_BP_DIRECT	GO:0010840~regulation of circadian sleep/wake cycle, wakefulness	3	0.195059	0.0119711	PTGER4, PTGER3, HCRTR2	1299	3	20094	15.4688	1	0.243136	0.236491
GOTERM_BP_DIRECT	GO:0032349~positive regulation of aldosterone biosynthetic process	3	0.195059	0.0119711	DAB2, BMP6, WNT4	1299	3	20094	15.4688	1	0.243136	0.236491
GOTERM_BP_DIRECT	GO:0031104~dendrite regeneration	3	0.195059	0.0119711	FAS, PTN, MATN2	1299	3	20094	15.4688	1	0.243136	0.236491
GOTERM_BP_DIRECT	GO:0003138~primary heart field specification	3	0.195059	0.0119711	MEF2C, WNT11, WNT5A	1299	3	20094	15.4688	1	0.243136	0.236491
GOTERM_BP_DIRECT	GO:0038098~sequestering of BMP from receptor via BMP binding	3	0.195059	0.0119711	GREM1, GREM2, NBL1	1299	3	20094	15.4688	1	0.243136	0.236491
GOTERM_BP_DIRECT	GO:0030334~regulation of cell migration	16	1.04031	0.0120998	LAMA2, LAMA4, TMSB15B1, LAMA3, TNC, UNC5C, THY1, LDB2, FGF2, DOCK10, FGF7, TNN, SST, LMNA, ENPP2, FGF20	1299	122	20094	2.0287	1	0.244751	0.238062
GOTERM_BP_DIRECT	GO:0001819~positive regulation of cytokine production	12	0.780234	0.0123915	PTGER4, P2RX7, RGCC, WNT3A, NFAM1, WNT5A, IRAK3, AGTR2, LGALS9, AGTR1A, ADRA2A, BATF	1299	79	20094	2.34969	1	0.249635	0.242813
GOTERM_BP_DIRECT	GO:0071277~cellular response to calcium ion	13	0.845254	0.0128707	CPNE8, NLGN1, MEF2C, CPNE5, CPNE4, KCNB1, NRXN1, ALOX15, WNT5A, HPCA, KRT10, ADCY8, RASA4	1299	90	20094	2.23439	1	0.255813	0.248821
GOTERM_BP_DIRECT	GO:0001942~hair follicle development	10	0.650195	0.0128813	EDAR, TGFB2, WNT10A, SOX18, TRPS1, INHBA, LDB2, APCDD1, DKK1, EGFR	1299	59	20094	2.62183	1	0.255813	0.248821
GOTERM_BP_DIRECT	GO:0032870~cellular response to hormone stimulus	7	0.455137	0.0131108	ROBO2, GHR, NCOA1, SLIT3, IGFBP7, RAMP1, ADRA2A	1299	31	20094	3.49296	1	0.255813	0.248821
GOTERM_BP_DIRECT	GO:0048701~embryonic cranial skeleton morphogenesis	8	0.520156	0.0131734	PDGFRA, TBX15, MMP14, IRX5, TWIST2, GAS1, RUNX2, TGFBR2	1299	40	20094	3.09376	1	0.255813	0.248821
GOTERM_BP_DIRECT	GO:0045595~regulation of cell differentiation	8	0.520156	0.0131734	EID1, CEBPD, BCL6, WNT3A, KLF4, RUNX3, RUNX2, RUNX1	1299	40	20094	3.09376	1	0.255813	0.248821
GOTERM_BP_DIRECT	GO:0046676~negative regulation of insulin secretion	8	0.520156	0.0131734	CHGA, PPP3CA, VSNL1, KCNB1, PTGER3, PTPRV, ADRA2A, FBN1	1299	40	20094	3.09376	1	0.255813	0.248821
GOTERM_BP_DIRECT	GO:0051967~negative regulation of synaptic transmission, glutamatergic	5	0.325098	0.013315	NPY2R, ADORA1, HTR1B, GRIK1, HTR2A	1299	15	20094	5.15627	1	0.255813	0.248821
GOTERM_BP_DIRECT	GO:2001259~positive regulation of cation channel activity	5	0.325098	0.013315	EDNRA, STAC, ADRB1, CTSS, PIRT	1299	15	20094	5.15627	1	0.255813	0.248821
GOTERM_BP_DIRECT	GO:1905665~positive regulation of calcium ion import across plasma membrane	5	0.325098	0.013315	PPP3CA, PPP3CC, ADRB1, ADRB2, AGTR1A	1299	15	20094	5.15627	1	0.255813	0.248821
GOTERM_BP_DIRECT	GO:0003184~pulmonary valve morphogenesis	5	0.325098	0.013315	ROBO2, TGFB2, JAG1, HEY2, NFATC1	1299	15	20094	5.15627	1	0.255813	0.248821
GOTERM_BP_DIRECT	GO:0060389~pathway-restricted SMAD protein phosphorylation	5	0.325098	0.013315	TGFBR3, TGFB2, BMP2, TGFBR2, GDF7	1299	15	20094	5.15627	1	0.255813	0.248821
GOTERM_BP_DIRECT	GO:0003084~positive regulation of systemic arterial blood pressure	5	0.325098	0.013315	CAMK2N1, RARRES2, ADORA1, ADRB1, AVPR1A	1299	15	20094	5.15627	1	0.255813	0.248821
GOTERM_BP_DIRECT	GO:0060395~SMAD protein signal transduction	12	0.780234	0.0135541	GDF10, BMP3, TGFB2, BMP2, TGFB3, MAGI2, SMAD9, VIM, INHBA, ITGB6, BMP6, GDF7	1299	80	20094	2.32032	1	0.259405	0.252315
GOTERM_BP_DIRECT	GO:0019221~cytokine-mediated signaling pathway	19	1.23537	0.0136086	CNTFR, CEBPA, STAT1, FLT3, IL1R1, IL10RB, CAV1, SLC1A1, IRAK3, IL1RAP, IIGP1, GHR, GREM2, SOCS1, IL2RB, LEPR, CD44, IL11RA1, PF4	1299	158	20094	1.86017	1	0.25945	0.252358
GOTERM_BP_DIRECT	GO:0048666~neuron development	11	0.715215	0.0140727	TGFB2, MEF2C, CTF1, MYT1L, NTF3, TRP73, EN1, NCAM1, NGF, GFRA3, RUNX1	1299	70	20094	2.43081	1	0.265386	0.258133
GOTERM_BP_DIRECT	GO:0044849~estrous cycle	6	0.390117	0.0141333	NCOA1, EGR1, OXTR, ANXA1, ENPP2, PTN	1299	23	20094	4.03534	1	0.265386	0.258133
GOTERM_BP_DIRECT	GO:0061564~axon development	6	0.390117	0.0141333	GRM7, DYNLT1C, EPB41L3, PLP1, PMP22, TBC1D24	1299	23	20094	4.03534	1	0.265386	0.258133
GOTERM_BP_DIRECT	GO:0007422~peripheral nervous system development	6	0.390117	0.0141333	NHLH2, ADGRB2, NTF3, PMP22, NGF, SOX10	1299	23	20094	4.03534	1	0.265386	0.258133
GOTERM_BP_DIRECT	GO:0007416~synapse assembly	10	0.650195	0.0143115	NLGN3, KIRREL3, DNM3, SDK1, NLGN1, NRXN1, PCDHB16, RAB29, SDK2, ADGRL3	1299	60	20094	2.57814	1	0.267723	0.260405
GOTERM_BP_DIRECT	GO:0010634~positive regulation of epithelial cell migration	8	0.520156	0.0150239	TGFB2, GLIPR2, ITGA2, ENPP2, CTSH, TAC1, AQP1, TGFBR2	1299	41	20094	3.01831	1	0.277914	0.270318
GOTERM_BP_DIRECT	GO:0001816~cytokine production	8	0.520156	0.0150239	EPHB6, WNT3A, WNT5A, SLC1A1, NFATC2, NFATC1, S1PR3, NFATC4	1299	41	20094	3.01831	1	0.277914	0.270318
GOTERM_BP_DIRECT	GO:0002027~regulation of heart rate	8	0.520156	0.0150239	RYR2, EDNRA, IRX5, FKBP1B, SHOX2, SLC1A1, CACNA1G, SNTA1	1299	41	20094	3.01831	1	0.277914	0.270318
GOTERM_BP_DIRECT	GO:0002092~positive regulation of receptor internalization	7	0.455137	0.0152767	GREM1, GM49486, DAB2, ANGPT1, WNT3A, MAGI2, NTF3	1299	32	20094	3.3838	1	0.281543	0.273848
GOTERM_BP_DIRECT	GO:0010942~positive regulation of cell death	10	0.650195	0.0158557	PRNP, EGR1, GRIN2A, UCP2, FAS, NOD1, HBA-A1, NRADD, GRIN2B, KCNK2	1299	61	20094	2.53587	1	0.291136	0.283179
GOTERM_BP_DIRECT	GO:0000902~cell morphogenesis	14	0.910273	0.0164446	TGFB2, AHR, SHROOM1, CLU, EGFR, P2RX7, GREM1, BCL6, CDH10, CDH12, ITGB6, MSX1, CDH18, CDH19	1299	104	20094	2.08234	1	0.293857	0.285826
GOTERM_BP_DIRECT	GO:0003283~atrial septum development	4	0.260078	0.0168257	WNT11, GJA5, WNT5A, DAND5	1299	9	20094	6.87503	1	0.293857	0.285826
GOTERM_BP_DIRECT	GO:2000969~positive regulation of AMPA receptor activity	4	0.260078	0.0168257	NLGN3, RELN, ADRB2, CACNG4	1299	9	20094	6.87503	1	0.293857	0.285826
GOTERM_BP_DIRECT	GO:0042487~regulation of odontogenesis of dentin-containing tooth	4	0.260078	0.0168257	WNT10A, BMP2, APCDD1, RUNX2	1299	9	20094	6.87503	1	0.293857	0.285826
GOTERM_BP_DIRECT	GO:0032964~collagen biosynthetic process	4	0.260078	0.0168257	RCN3, COL1A1, COL5A1, P3H3	1299	9	20094	6.87503	1	0.293857	0.285826
GOTERM_BP_DIRECT	GO:0097091~synaptic vesicle clustering	4	0.260078	0.0168257	NLGN1, RAB3A, NRXN1, SYNDIG1	1299	9	20094	6.87503	1	0.293857	0.285826
GOTERM_BP_DIRECT	GO:0042538~hyperosmotic salinity response	4	0.260078	0.0168257	TRPV4, TACR3, CLDN1, AQP1	1299	9	20094	6.87503	1	0.293857	0.285826
GOTERM_BP_DIRECT	GO:2000391~positive regulation of neutrophil extravasation	4	0.260078	0.0168257	PTGER4, RIPOR2, IL1R1, PTGER3	1299	9	20094	6.87503	1	0.293857	0.285826
GOTERM_BP_DIRECT	GO:0043269~regulation of ion transport	4	0.260078	0.0168257	FXYD3, FXYD2, FXYD1, FXYD7	1299	9	20094	6.87503	1	0.293857	0.285826
GOTERM_BP_DIRECT	GO:0097623~potassium ion export across plasma membrane	5	0.325098	0.0168623	KCNB1, KCNE4, KCNIP2, KCNE1L, KCNA5	1299	16	20094	4.83401	1	0.293857	0.285826
GOTERM_BP_DIRECT	GO:0046632~alpha-beta T cell differentiation	5	0.325098	0.0168623	ZAP70, ANXA1, BCL11B, LEF1, RORC	1299	16	20094	4.83401	1	0.293857	0.285826
GOTERM_BP_DIRECT	GO:0016322~neuron remodeling	5	0.325098	0.0168623	C1QA, EDNRA, EPHA8, ADGRB3, CSPG4	1299	16	20094	4.83401	1	0.293857	0.285826
GOTERM_BP_DIRECT	GO:0043171~peptide catabolic process	5	0.325098	0.0168623	ENPEP, CPQ, LVRN, CPE, TRHDE	1299	16	20094	4.83401	1	0.293857	0.285826
GOTERM_BP_DIRECT	GO:1903672~positive regulation of sprouting angiogenesis	6	0.390117	0.0169251	BMPER, TNN, SEC1, KLF4, FUT1, FGF2	1299	24	20094	3.86721	1	0.293857	0.285826
GOTERM_BP_DIRECT	GO:0097746~regulation of blood vessel diameter	6	0.390117	0.0169251	TGFBR3, GJA5, KCNMA1, ADRB2, AHR, AGTR2	1299	24	20094	3.86721	1	0.293857	0.285826
GOTERM_BP_DIRECT	GO:0045785~positive regulation of cell adhesion	11	0.715215	0.0169488	PTGER4, APBB1IP, PPP3CA, CALCA, DAB2, ANGPT1, LAMA2, ITGA2, TPM1, CHRD, PRKCA	1299	72	20094	2.36329	1	0.293857	0.285826
GOTERM_BP_DIRECT	GO:0007219~Notch signaling pathway	16	1.04031	0.0170327	FOXA1, CEBPA, JAG1, ANXA4, DTX1, KCNA5, TGFBR2, TMEM100, NFKBIA, NEURL1B, BMP2, HEY2, SNAI2, S1PR3, FAT4, SUSD5	1299	127	20094	1.94883	1	0.294287	0.286244
GOTERM_BP_DIRECT	GO:0010595~positive regulation of endothelial cell migration	10	0.650195	0.0175185	SMOC2, SPARC, ANGPT1, SEC1, WNT5A, LCN2, PRKCA, FUT1, FGF2, RIN2	1299	62	20094	2.49497	1	0.301634	0.29339
GOTERM_BP_DIRECT	GO:0045597~positive regulation of cell differentiation	11	0.715215	0.0185396	GHR, BTC, AR, BMP2, LEF1, SMAD9, WNT9A, PTN, SMARCA2, CLU, FGF2	1299	73	20094	2.33092	1	0.318113	0.309419
GOTERM_BP_DIRECT	GO:0006468~protein phosphorylation	57	3.70611	0.0187999	EPHB6, FLT3, LRRK2, NRK, RORC, AATK, MYLK3, RPS6KA4, NRBP2, EDNRA, PRKG2, STK32B, PDK2, EPHA5, CDKL2, PDGFRA, CAMK1D, EPHA8, IGFBP3, WNT5A, INSRR, IRAK3, PRKCA, NGF, RUNX3, OOEP, TGFBR2, HCK, ZAP70, LATS2, PRKAR1B, PRKCQ, FAM20A, SGK1, ALPK1, CALCA, GUCY2E, PNCK, NPR2, MST1R, EGFR, WNT11, NTRK2, TGFB2, PLK5, PLK2, GLYCTK, DCLK3, SMAD9, DCLK1, P2RX7, PINK1, BMP2, AXL, CAMK1, FGFR4, FRK	1299	655	20094	1.34614	1	0.321471	0.312685
GOTERM_BP_DIRECT	GO:0043542~endothelial cell migration	8	0.520156	0.019266	GREM1, CALCA, SNAI2, CDH13, VSTM4, FSTL1, FGF2, LOXL2	1299	43	20094	2.87792	1	0.327045	0.318107
GOTERM_BP_DIRECT	GO:0030534~adult behavior	8	0.520156	0.019266	NLGN3, SPTBN4, NR4A3, GRM7, NRXN1, SLC1A1, GRIK1, SHANK1	1299	43	20094	2.87792	1	0.327045	0.318107
GOTERM_BP_DIRECT	GO:0051091~positive regulation of sequence-specific DNA binding transcription factor activity	16	1.04031	0.0193887	FOXA1, FANK1, TRIM12C, WNT10B, WNT3A, NFAM1, ARID5B, NGF, PPP3CA, PINK1, BMP2, RGCC, TRAF5, CYTL1, PPARGC1A, TRIM12A	1299	129	20094	1.91861	1	0.327045	0.318107
GOTERM_BP_DIRECT	GO:0071456~cellular response to hypoxia	16	1.04031	0.0193887	COX4I2, NDNF, ADRB2, HIF3A, PTN, VLDLR, NOL3, S100B, NDRG1, AQP1, CPEB1, PINK1, RGCC, LMNA, PPARGC1A, KCNK2	1299	129	20094	1.91861	1	0.327045	0.318107
GOTERM_BP_DIRECT	GO:2000648~positive regulation of stem cell proliferation	9	0.585176	0.0196472	OSR2, TLX1, WNT5A, SHOX2, PAX3, NGF, FGF2, RUNX2, TBX18	1299	53	20094	2.62678	1	0.330286	0.321259
GOTERM_BP_DIRECT	GO:0010243~response to organonitrogen compound	6	0.390117	0.0200593	VKORC1, NNMT, FLT3, TRP73, CDO1, GRIN2B	1299	25	20094	3.71252	1	0.335711	0.326535
GOTERM_BP_DIRECT	GO:0006357~regulation of transcription from RNA polymerase II promoter	125	8.12744	0.0201049	FOXA1, EHF, MYT1L, RORC, SCX, AHR, PRDM1, NR3C1, ETS2, ZFP36, A430033K04RIK, CREB3L1, CREB3L2, HOXA1, OSR2, ZFP853, MEF2C, OSR1, EBF1, TRP73, ARID5B, EBF3, RUNX3, SOX10, RUNX2, HIC1, RUNX1, AR, ERG, ATF5, ZBTB8A, TSHZ3, HOXD1, ZFP108, TSHZ2, SHOX2, GLIS3, TWIST2, FOXO6, GLIS1, NPAS2, NHLH2, NHLH1, ALX1, EGR1, WNT10B, MYPOP, BCL11B, ZFP637, BCL11A, NFATC2, SMAD9, NFATC1, INHBA, SMARCA2, POU6F1, FO…	1299	1606	20094	1.20399	1	0.335711	0.326535
GOTERM_BP_DIRECT	GO:0034220~ion transmembrane transport	11	0.715215	0.0202373	GABRA2, GABRP, GABRA1, RYR2, GABRB1, CHRNA5, GABRA4, ANXA6, TRPM5, GABRG3, ASIC3	1299	74	20094	2.29942	1	0.336793	0.327588
GOTERM_BP_DIRECT	GO:0018149~peptide cross-linking	7	0.455137	0.0203265	TGM1, COL3A1, ANXA1, KRT1, KRT10, SPRR1A, EVPL	1299	34	20094	3.18476	1	0.337149	0.327935
GOTERM_BP_DIRECT	GO:0071260~cellular response to mechanical stimulus	14	0.910273	0.0204136	PTGER4, RIPOR2, CAV1, ITGA2, SCX, ATP1A2, BMP6, EGFR, AQP1, COL1A1, CNN2, EDNRA, WNT11, KCNJ2	1299	107	20094	2.02396	1	0.337469	0.328245
GOTERM_BP_DIRECT	GO:0045444~fat cell differentiation	13	0.845254	0.0206646	GDF10, WNT10B, CEBPA, CEBPD, WNT3A, TGFB1I1, ARID5B, KLF4, GLIS1, NR4A3, SOCS1, ATF5, RUNX1T1	1299	96	20094	2.09474	1	0.340486	0.33118
GOTERM_BP_DIRECT	GO:0050918~positive chemotaxis	5	0.325098	0.0209468	SEMA5A, LGALS3, FGF7, ANGPT1, SCG2	1299	17	20094	4.54965	1	0.341741	0.332401
GOTERM_BP_DIRECT	GO:0071372~cellular response to follicle-stimulating hormone stimulus	5	0.325098	0.0209468	EPHA5, EDNRA, EPHA8, INHBA, PPARGC1A	1299	17	20094	4.54965	1	0.341741	0.332401
GOTERM_BP_DIRECT	GO:0070498~interleukin-1-mediated signaling pathway	5	0.325098	0.0209468	RPS6KA4, EGR1, IL1R1, TNIP2, IRAK3	1299	17	20094	4.54965	1	0.341741	0.332401
GOTERM_BP_DIRECT	GO:0042698~ovulation cycle	4	0.260078	0.0228987	NHLH2, GABRB1, AXL, EGFR	1299	10	20094	6.18753	1	0.355272	0.345562
GOTERM_BP_DIRECT	GO:2000987~positive regulation of behavioral fear response	4	0.260078	0.0228987	MEF2C, GRP, PENK, NPAS2	1299	10	20094	6.18753	1	0.355272	0.345562
GOTERM_BP_DIRECT	GO:0061037~negative regulation of cartilage development	4	0.260078	0.0228987	TGFB2, CTSK, NOG, WNT9A	1299	10	20094	6.18753	1	0.355272	0.345562
GOTERM_BP_DIRECT	GO:0010594~regulation of endothelial cell migration	4	0.260078	0.0228987	SEMA4A, BMPER, EMP2, PTN	1299	10	20094	6.18753	1	0.355272	0.345562
GOTERM_BP_DIRECT	GO:0045762~positive regulation of adenylate cyclase activity	4	0.260078	0.0228987	HPCA, TIMP2, ADRB1, CACNA1C	1299	10	20094	6.18753	1	0.355272	0.345562
GOTERM_BP_DIRECT	GO:0007621~negative regulation of female receptivity	3	0.195059	0.0229185	THRB, PPP1R1B, AVPR1A	1299	4	20094	11.6016	1	0.355272	0.345562
GOTERM_BP_DIRECT	GO:0099566~regulation of postsynaptic cytosolic calcium ion concentration	3	0.195059	0.0229185	WNT5A, FZD9, GRIN2B	1299	4	20094	11.6016	1	0.355272	0.345562
GOTERM_BP_DIRECT	GO:0042305~specification of segmental identity, mandibular segment	3	0.195059	0.0229185	EDNRA, NOG, CHRD	1299	4	20094	11.6016	1	0.355272	0.345562
GOTERM_BP_DIRECT	GO:0035582~sequestering of BMP in extracellular matrix	3	0.195059	0.0229185	NBL1, DAND5, FBN1	1299	4	20094	11.6016	1	0.355272	0.345562
GOTERM_BP_DIRECT	GO:0048050~post-embryonic eye morphogenesis	3	0.195059	0.0229185	EFEMP1, MFAP2, FBN1	1299	4	20094	11.6016	1	0.355272	0.345562
GOTERM_BP_DIRECT	GO:1905279~regulation of retrograde transport, endosome to Golgi	3	0.195059	0.0229185	LRRK2, RAB29, ATP9A	1299	4	20094	11.6016	1	0.355272	0.345562
GOTERM_BP_DIRECT	GO:1900738~positive regulation of phospholipase C-activating G-protein coupled receptor signaling pathway	3	0.195059	0.0229185	GPR27, CHGA, GRP	1299	4	20094	11.6016	1	0.355272	0.345562
GOTERM_BP_DIRECT	GO:1990523~bone regeneration	3	0.195059	0.0229185	POSTN, FZD9, LGR6	1299	4	20094	11.6016	1	0.355272	0.345562
GOTERM_BP_DIRECT	GO:0090082~positive regulation of heart induction by negative regulation of canonical Wnt signaling pathway	3	0.195059	0.0229185	WNT11, WNT5A, DKK1	1299	4	20094	11.6016	1	0.355272	0.345562
GOTERM_BP_DIRECT	GO:1903170~negative regulation of calcium ion transmembrane transport	3	0.195059	0.0229185	PTGER3, ATP1A2, AHR	1299	4	20094	11.6016	1	0.355272	0.345562
GOTERM_BP_DIRECT	GO:0060571~morphogenesis of an epithelial fold	3	0.195059	0.0229185	AR, EGFR, GDF7	1299	4	20094	11.6016	1	0.355272	0.345562
GOTERM_BP_DIRECT	GO:0045930~negative regulation of mitotic cell cycle	7	0.455137	0.0232314	CDKN1C, BTG1, BRINP1, TIMP2, GAS1, BRINP3, EGFR	1299	35	20094	3.09376	1	0.358435	0.348639
GOTERM_BP_DIRECT	GO:0031532~actin cytoskeleton reorganization	10	0.650195	0.0232666	EPS8, FGF7, ANXA1, THSD7B, TRPV4, NRK, INSRR, ANTXR1, PDLIM4, S100A9	1299	65	20094	2.37982	1	0.358435	0.348639
GOTERM_BP_DIRECT	GO:0010842~retina layer formation	6	0.390117	0.0235502	SDK1, CALB1, MEGF11, IRX6, SLC1A1, SDK2	1299	26	20094	3.56973	1	0.361685	0.3518
GOTERM_BP_DIRECT	GO:0048469~cell maturation	8	0.520156	0.0242812	CEBPA, SOX18, AXL, KCNMA1, PTH1R, SOX10, RUNX3, RUNX2	1299	45	20094	2.75001	1	0.371764	0.361603
GOTERM_BP_DIRECT	GO:0014002~astrocyte development	5	0.325098	0.0255868	LAMC3, PLP1, VIM, S100A9, S100A8	1299	18	20094	4.2969	1	0.386991	0.376414
GOTERM_BP_DIRECT	GO:0071625~vocalization behavior	5	0.325098	0.0255868	NLGN3, BRINP1, SRPX2, NRXN1, SHANK1	1299	18	20094	4.2969	1	0.386991	0.376414
GOTERM_BP_DIRECT	GO:2000649~regulation of sodium ion transmembrane transporter activity	5	0.325098	0.0255868	FXYD3, FXYD2, FXYD1, FXYD7, SCN3B	1299	18	20094	4.2969	1	0.386991	0.376414
GOTERM_BP_DIRECT	GO:0042445~hormone metabolic process	5	0.325098	0.0255868	GHR, FOXA1, SELENOM, PAPSS2, WNT4	1299	18	20094	4.2969	1	0.386991	0.376414
GOTERM_BP_DIRECT	GO:0002040~sprouting angiogenesis	7	0.455137	0.0264021	ESM1, ANGPT1, LEF1, CDH13, RSPO3, VSTM4, LOXL2	1299	36	20094	3.00783	1	0.396908	0.38606
GOTERM_BP_DIRECT	GO:0031069~hair follicle morphogenesis	7	0.455137	0.0264021	TGFB2, FGF7, WNT10A, KRT17, FST, RUNX3, RUNX1	1299	36	20094	3.00783	1	0.396908	0.38606
GOTERM_BP_DIRECT	GO:1903078~positive regulation of protein localization to plasma membrane	9	0.585176	0.0265981	DPP10, PRNP, LGALS3, WNT3A, STAC, NRXN1, ATP2B4, EGFR, NKD2	1299	56	20094	2.48606	1	0.398651	0.387756
GOTERM_BP_DIRECT	GO:0042220~response to cocaine	8	0.520156	0.0270965	OXTR, PPP1R1B, EN1, TACR3, HTR1B, NCAM1, CACNG4, ADGRL3	1299	46	20094	2.69023	1	0.404902	0.393835
GOTERM_BP_DIRECT	GO:0030325~adrenal gland development	6	0.390117	0.02741	CDKN1C, PDGFRA, WNT11, ARID5B, NR3C1, WNT4	1299	27	20094	3.43752	1	0.407141	0.396013
GOTERM_BP_DIRECT	GO:0048843~negative regulation of axon extension involved in axon guidance	6	0.390117	0.02741	SEMA5A, SEMA6B, SEMA4A, WNT3A, WNT5A, SEMA4F	1299	27	20094	3.43752	1	0.407141	0.396013
GOTERM_BP_DIRECT	GO:0032526~response to retinoic acid	10	0.650195	0.0277765	NCOA1, GJB2, CTSH, IGFBP7, TRIM16, KLF4, DKK1, RXRG, BMP6, RUNX1	1299	67	20094	2.30878	1	0.411357	0.400114
GOTERM_BP_DIRECT	GO:0043627~response to estrogen	11	0.715215	0.0281719	TGFB2, MMP14, MME, TGFB3, CAV1, MMP2, KCNMA1, TNFRSF11B, AGTR1A, AQP1, TGFBR2	1299	78	20094	2.1815	1	0.415974	0.404605
GOTERM_BP_DIRECT	GO:0006935~chemotaxis	16	1.04031	0.0296126	ROBO2, PDGFRA, RIPOR2, PLGRKT, CMTM3, CMTM5, RARRES2, LSP1, CXCL5, ENPP2, PROK2, ACKR3, LGALS9, S100A9, S100A8, PF4	1299	136	20094	1.81986	1	0.43396	0.4221
GOTERM_BP_DIRECT	GO:0060351~cartilage development involved in endochondral bone morphogenesis	4	0.260078	0.0300005	GHR, COL1A1, TRPV4, SHOX2	1299	11	20094	5.62503	1	0.43396	0.4221
GOTERM_BP_DIRECT	GO:0099558~maintenance of synapse structure	4	0.260078	0.0300005	NLGN1, ADGRB3, NRXN1, CBLN4	1299	11	20094	5.62503	1	0.43396	0.4221
GOTERM_BP_DIRECT	GO:0097084~vascular smooth muscle cell development	4	0.260078	0.0300005	EDNRA, EFEMP2, HEY2, NFATC4	1299	11	20094	5.62503	1	0.43396	0.4221
GOTERM_BP_DIRECT	GO:0014037~Schwann cell differentiation	4	0.260078	0.0300005	LAMA2, NAB2, ADGRG6, PMP22	1299	11	20094	5.62503	1	0.43396	0.4221
GOTERM_BP_DIRECT	GO:0022414~reproductive process	4	0.260078	0.0300005	SPTBN4, KCNU1, NPR2, ANTXR1	1299	11	20094	5.62503	1	0.43396	0.4221
GOTERM_BP_DIRECT	GO:0030193~regulation of blood coagulation	4	0.260078	0.0300005	VKORC1, CAV1, SERPING1, F2RL1	1299	11	20094	5.62503	1	0.43396	0.4221
GOTERM_BP_DIRECT	GO:0030574~collagen catabolic process	8	0.520156	0.0301257	MMP23, MMP11, ADAMTS2, MMP14, CTSK, MMP2, MMP9, CTSS	1299	47	20094	2.63299	1	0.434508	0.422633
GOTERM_BP_DIRECT	GO:0000187~activation of MAPK activity	10	0.650195	0.0302475	P2RX7, GHR, CD74, BMP2, TGFB3, LRRK2, WNT5A, NTF3, TRP73, PROK2	1299	68	20094	2.27483	1	0.435004	0.423115
GOTERM_BP_DIRECT	GO:0071363~cellular response to growth factor stimulus	11	0.715215	0.0304589	MYOG, MEF2C, BMP2, SPARC, PLK5, TGFB3, SPHK1, PAX9, KLF4, EGFR, TGFBR2	1299	79	20094	2.15389	1	0.435344	0.423445
GOTERM_BP_DIRECT	GO:0051693~actin filament capping	5	0.325098	0.030796	SPTBN4, SCIN, GSN, TPM1, CAPG	1299	19	20094	4.07074	1	0.435344	0.423445
GOTERM_BP_DIRECT	GO:0035418~protein localization to synapse	5	0.325098	0.030796	NLGN1, RELN, LRRTM1, NRXN1, SHANK1	1299	19	20094	4.07074	1	0.435344	0.423445
GOTERM_BP_DIRECT	GO:1901379~regulation of potassium ion transmembrane transport	5	0.325098	0.030796	DPP10, PRNP, KCNIP2, KCNIP3, KCNE1L	1299	19	20094	4.07074	1	0.435344	0.423445
GOTERM_BP_DIRECT	GO:0060074~synapse maturation	5	0.325098	0.030796	NLGN1, NFIA, NRXN1, SHANK1, NFATC4	1299	19	20094	4.07074	1	0.435344	0.423445
GOTERM_BP_DIRECT	GO:1904888~cranial skeletal system development	5	0.325098	0.030796	TGFB2, EDNRA, COLEC10, NOG, CHRD	1299	19	20094	4.07074	1	0.435344	0.423445
GOTERM_BP_DIRECT	GO:0045766~positive regulation of angiogenesis	18	1.17035	0.0312956	SEMA5A, BTG1, SPHK1, WNT5A, HSPB1, PRKCA, MMP9, FGF2, AGTR1A, RUNX1, AQP1, TGFBR2, GREM1, SMOC2, LGALS3, CHIL1, CTSH, HPSE	1299	161	20094	1.72943	1	0.441153	0.429096
GOTERM_BP_DIRECT	GO:0019934~cGMP-mediated signaling	6	0.390117	0.0316491	GUCY1A1, GUCY2E, GUCY1B1, NPR2, PDE3A, AQP1	1299	28	20094	3.31475	1	0.444875	0.432716
GOTERM_BP_DIRECT	GO:0030155~regulation of cell adhesion	9	0.585176	0.0320828	GSN, LAMA2, EPHA8, TNN, LAMA4, LAMA3, TNC, GPR4, FUT1	1299	58	20094	2.40033	1	0.449702	0.437411
GOTERM_BP_DIRECT	GO:0016485~protein processing	12	0.780234	0.0323632	P2RX7, ENPEP, ADAMTS2, MAFB, MME, CPXM2, CPE, TLL1, PCSK5, ASPRV1, CTSS, PTHLH	1299	91	20094	2.03984	1	0.450462	0.43815
GOTERM_BP_DIRECT	GO:0021766~hippocampus development	12	0.780234	0.0323632	KIRREL3, SEMA6B, NCOA1, HSD3B6, EPHA5, ZEB2, RELN, NR4A3, WNT3A, LEF1, TRP73, ATP2B4	1299	91	20094	2.03984	1	0.450462	0.43815
GOTERM_BP_DIRECT	GO:0007409~axonogenesis	14	0.910273	0.0324086	NTNG1, RTN4R, SPTBN4, SEMA4A, RAB3A, BCL11B, WNT3A, WNT5A, APLP1, DCLK1, TNN, SLITRK3, TRIM46, CTNNA2	1299	114	20094	1.89968	1	0.450462	0.43815
GOTERM_BP_DIRECT	GO:0001938~positive regulation of endothelial cell proliferation	11	0.715215	0.0328738	SEMA5A, FGF7, BMP2, CAV2, CAV1, WNT5A, CDH13, PRKCA, FGF2, SCG2, BMP6	1299	80	20094	2.12696	1	0.455271	0.442828
GOTERM_BP_DIRECT	GO:0002376~immune system process	46	2.9909	0.0329376	H2-T23, C1QA, IFITM1, NLRX1, H2-DMA, NOD1, AHR, MST1R, PRDM1, IL1RAP, PTMS, LGALS3, IL1RL2, CD1D1, ALCAM, C1S1, TRIM29, TNFRSF14, LGALS9, CD55, OASL1, CD177, OASL2, GSDMD, CD74, SEMA4A, C1RA, ANXA1, TFEB, TAP1, NMI, MR1, LAX1, IIGP1, ZAP70, HCK, BCL6, SLPI, AXL, LCN2, SERPING1, F2RL1, PRKCQ, ALPK1, S100A9, S100A8	1299	526	20094	1.35279	1	0.455271	0.442828
GOTERM_BP_DIRECT	GO:0045184~establishment of protein localization	8	0.520156	0.0333745	GRIA2, RIPOR2, NLGN1, NRXN1, ITGA2, SLC1A1, ITGA8, PDZD7	1299	48	20094	2.57814	1	0.457561	0.445055
GOTERM_BP_DIRECT	GO:0035774~positive regulation of insulin secretion involved in cellular response to glucose stimulus	8	0.520156	0.0333745	GPR27, VSNL1, CAMK2N1, MPC2, LEPR, ADCY8, CFTR, BAIAP3	1299	48	20094	2.57814	1	0.457561	0.445055
GOTERM_BP_DIRECT	GO:0006693~prostaglandin metabolic process	7	0.455137	0.0335736	GSTM2, GSTM1, HPGD, CYP2S1, TBXAS1, PTGR1, PTGDS	1299	38	20094	2.84952	1	0.457561	0.445055
GOTERM_BP_DIRECT	GO:0050807~regulation of synapse organization	7	0.455137	0.0335736	PTPRT, SPARC, WNT3A, WNT5A, SPARCL1, CAMK1, DKK1	1299	38	20094	2.84952	1	0.457561	0.445055
GOTERM_BP_DIRECT	GO:0043113~receptor clustering	7	0.455137	0.0335736	GM49486, DLG2, MAGI2, MADCAM1, PTN, THY1, GRIN2B	1299	38	20094	2.84952	1	0.457561	0.445055
GOTERM_BP_DIRECT	GO:0033138~positive regulation of peptidyl-serine phosphorylation	13	0.845254	0.033655	NTRK2, ANGPT1, WNT3A, CAV1, NRXN1, WNT5A, ATP2B4, NGF, EGFR, PINK1, NTF3, CAMK1, CD44	1299	103	20094	1.95238	1	0.457561	0.445055
GOTERM_BP_DIRECT	GO:0030593~neutrophil chemotaxis	11	0.715215	0.0354198	GM10591, LGALS3, TGFB2, PDE4B, SRP54B, PRKCA, PPBP, S100A9, CXCL5, S100A8, PF4	1299	81	20094	2.1007	1	0.47779	0.464731
GOTERM_BP_DIRECT	GO:0051894~positive regulation of focal adhesion assembly	6	0.390117	0.036276	COL16A1, SDC4, ENPP2, THY1, WNT4, S100A10	1299	29	20094	3.20045	1	0.47779	0.464731
GOTERM_BP_DIRECT	GO:0070106~interleukin-27-mediated signaling pathway	3	0.195059	0.0365733	STAT1, OASL1, OASL2	1299	5	20094	9.28129	1	0.47779	0.464731
GOTERM_BP_DIRECT	GO:2000405~negative regulation of T cell migration	3	0.195059	0.0365733	RIPOR2, APOD, CD200	1299	5	20094	9.28129	1	0.47779	0.464731
GOTERM_BP_DIRECT	GO:0072102~glomerulus morphogenesis	3	0.195059	0.0365733	KIRREL3, MEF2C, AHR	1299	5	20094	9.28129	1	0.47779	0.464731
GOTERM_BP_DIRECT	GO:0021891~olfactory bulb interneuron development	3	0.195059	0.0365733	ROBO2, WNT5A, ATF5	1299	5	20094	9.28129	1	0.47779	0.464731
GOTERM_BP_DIRECT	GO:0072162~metanephric mesenchymal cell differentiation	3	0.195059	0.0365733	STAT1, OSR1, WNT4	1299	5	20094	9.28129	1	0.47779	0.464731
GOTERM_BP_DIRECT	GO:0018057~peptidyl-lysine oxidation	3	0.195059	0.0365733	LOX, LOXL1, LOXL2	1299	5	20094	9.28129	1	0.47779	0.464731
GOTERM_BP_DIRECT	GO:0090272~negative regulation of fibroblast growth factor production	3	0.195059	0.0365733	RGCC, WNT11, FGFR4	1299	5	20094	9.28129	1	0.47779	0.464731
GOTERM_BP_DIRECT	GO:0031117~positive regulation of microtubule depolymerization	3	0.195059	0.0365733	TRPV4, STMN2, HTR1A	1299	5	20094	9.28129	1	0.47779	0.464731
GOTERM_BP_DIRECT	GO:0032642~regulation of chemokine production	3	0.195059	0.0365733	SNAI2, ACKR1, CXCL5	1299	5	20094	9.28129	1	0.47779	0.464731
GOTERM_BP_DIRECT	GO:0048592~eye morphogenesis	3	0.195059	0.0365733	COL5A1, COL5A2, GAS1	1299	5	20094	9.28129	1	0.47779	0.464731
GOTERM_BP_DIRECT	GO:0051145~smooth muscle cell differentiation	5	0.325098	0.0365832	MEF2C, NTF3, TBX18, WNT4, NFATC4	1299	20	20094	3.86721	1	0.47779	0.464731
GOTERM_BP_DIRECT	GO:0032230~positive regulation of synaptic transmission, GABAergic	5	0.325098	0.0365832	NLGN1, OXTR, NRXN1, GRIK1, TAC1	1299	20	20094	3.86721	1	0.47779	0.464731
GOTERM_BP_DIRECT	GO:0001913~T cell mediated cytotoxicity	5	0.325098	0.0365832	P2RX7, H2-T23, CTSH, EMP2, STX11	1299	20	20094	3.86721	1	0.47779	0.464731
GOTERM_BP_DIRECT	GO:0051482~positive regulation of cytosolic calcium ion concentration involved in phospholipase C-activating G-protein coupled signaling pathway	7	0.455137	0.0375884	GPR17, EDNRA, CALCA, F2RL1, GPR4, AGTR1A, RXFP3	1299	39	20094	2.77646	1	0.4839	0.470674
GOTERM_BP_DIRECT	GO:0060349~bone morphogenesis	7	0.455137	0.0375884	OSR2, CYP26B1, SP5, MSX1, LTBP3, PAX1, PAPPA2	1299	39	20094	2.77646	1	0.4839	0.470674
GOTERM_BP_DIRECT	GO:1901215~negative regulation of neuron death	11	0.715215	0.0380997	GHR, CHGA, PINK1, WNT3A, NPY, LRRK2, EN1, TAC1, ENO2, PPARGC1A, CD200	1299	82	20094	2.07509	1	0.4839	0.470674
GOTERM_BP_DIRECT	GO:0014049~positive regulation of glutamate secretion	4	0.260078	0.0381207	P2RX7, AVPR1A, NR3C1, GRIN2B	1299	12	20094	5.15627	1	0.4839	0.470674
GOTERM_BP_DIRECT	GO:0006182~cGMP biosynthetic process	4	0.260078	0.0381207	GUCY1A1, GUCY2E, GUCY1B1, NPR2	1299	12	20094	5.15627	1	0.4839	0.470674
GOTERM_BP_DIRECT	GO:0070244~negative regulation of thymocyte apoptotic process	4	0.260078	0.0381207	EFNA1, BCL11B, RORC, RAG1	1299	12	20094	5.15627	1	0.4839	0.470674
GOTERM_BP_DIRECT	GO:0000904~cell morphogenesis involved in differentiation	4	0.260078	0.0381207	DAB2, RELN, LAMC3, DKK1	1299	12	20094	5.15627	1	0.4839	0.470674
GOTERM_BP_DIRECT	GO:0048846~axon extension involved in axon guidance	4	0.260078	0.0381207	NRP2, ALCAM, WNT5A, SLIT3	1299	12	20094	5.15627	1	0.4839	0.470674
GOTERM_BP_DIRECT	GO:0060272~embryonic skeletal joint morphogenesis	4	0.260078	0.0381207	OSR2, OSR1, NOG, SHOX2	1299	12	20094	5.15627	1	0.4839	0.470674
GOTERM_BP_DIRECT	GO:0051122~hepoxilin biosynthetic process	4	0.260078	0.0381207	GSTM2, GSTM1, ALOX15, GSTM7	1299	12	20094	5.15627	1	0.4839	0.470674
GOTERM_BP_DIRECT	GO:0030431~sleep	4	0.260078	0.0381207	GRIN2A, OXTR, HTR2A, PTGDR	1299	12	20094	5.15627	1	0.4839	0.470674
GOTERM_BP_DIRECT	GO:0072659~protein localization to plasma membrane	18	1.17035	0.0401886	DPP10, SPTBN4, RAB3A, ANXA2, KCNB1, RAB3D, KCNIP3, KCNB2, TESC, LYPD1, EMP2, NKD2, RAB40B, EPB41L3, PRKG2, SCN3B, RAMP1, S100A10	1299	166	20094	1.67734	1	0.508851	0.494944
GOTERM_BP_DIRECT	GO:0060173~limb development	8	0.520156	0.0405519	GREM1, NOG, RSPO2, EN1, RSPO3, KREMEN2, DKK1, PAM	1299	50	20094	2.47501	1	0.512148	0.49815
GOTERM_BP_DIRECT	GO:0007043~cell-cell junction assembly	6	0.390117	0.0412974	TRPV4, CDH10, CDH12, PKP1, CDH18, CDH19	1299	30	20094	3.09376	1	0.516321	0.502209
GOTERM_BP_DIRECT	GO:1900273~positive regulation of long-term synaptic potentiation	6	0.390117	0.0412974	RELN, MME, PRKAR1B, ADRB1, ADCY8, NRGN	1299	30	20094	3.09376	1	0.516321	0.502209
GOTERM_BP_DIRECT	GO:0030279~negative regulation of ossification	6	0.390117	0.0412974	CALCA, MEF2C, ADRB2, KREMEN2, DKK1, GFRA4	1299	30	20094	3.09376	1	0.516321	0.502209
GOTERM_BP_DIRECT	GO:0051899~membrane depolarization	6	0.390117	0.0412974	P2RX7, CHRNA5, CAV1, GRIK1, SCN3B, CNGB1	1299	30	20094	3.09376	1	0.516321	0.502209
GOTERM_BP_DIRECT	GO:0032757~positive regulation of interleukin-8 production	9	0.585176	0.0416789	PTGER4, CD74, CALCA, AFAP1L2, WNT5A, CHIL1, F2RL1, NOD1, IL17D	1299	61	20094	2.28229	1	0.517318	0.503179
GOTERM_BP_DIRECT	GO:0030177~positive regulation of Wnt signaling pathway	7	0.455137	0.0418969	ZEB2, BMP2, LEF1, RSPO2, RSPO3, LGR6, DACT1	1299	40	20094	2.70704	1	0.517318	0.503179
GOTERM_BP_DIRECT	GO:0033627~cell adhesion mediated by integrin	7	0.455137	0.0418969	COL16A1, ITGB4, ITGA2, ITGA11, ITGA8, ITGB6, FBN1	1299	40	20094	2.70704	1	0.517318	0.503179
GOTERM_BP_DIRECT	GO:0048678~response to axon injury	7	0.455137	0.0418969	LGALS1, SLC1A1, APOD, FGF2, KCNK2, MATN4, MATN2	1299	40	20094	2.70704	1	0.517318	0.503179
GOTERM_BP_DIRECT	GO:0034394~protein localization to cell surface	7	0.455137	0.0418969	FGF7, WNT11, ANGPT1, EMP2, ASTN2, FBLN5, CD177	1299	40	20094	2.70704	1	0.517318	0.503179
GOTERM_BP_DIRECT	GO:0070588~calcium ion transmembrane transport	12	0.780234	0.0424125	TMEM37, RYR2, EDNRA, TRPV6, TRPV4, CACNA2D1, CACNA2D3, ATP2B4, CACNA1C, TRPM5, CACNG4, CACNA1G	1299	95	20094	1.95396	1	0.522388	0.50811
GOTERM_BP_DIRECT	GO:0030278~regulation of ossification	5	0.325098	0.0429527	PTGER4, CREB3L1, P3H1, TENT5A, RUNX2	1299	21	20094	3.68305	1	0.526436	0.512047
GOTERM_BP_DIRECT	GO:0060307~regulation of ventricular cardiac muscle cell membrane repolarization	5	0.325098	0.0429527	KCNE4, CACNA2D1, GJA5, KCNE1L, SNTA1	1299	21	20094	3.68305	1	0.526436	0.512047
GOTERM_BP_DIRECT	GO:0007229~integrin-mediated signaling pathway	13	0.845254	0.0432666	MPIG6B, ITGB4, ITGA2, LAMA3, ADAM33, PTN, THY1, ADAMTS20, COL3A1, ITGA11, ITGA8, MADCAM1, ITGB6	1299	107	20094	1.87939	1	0.52898	0.514522
GOTERM_BP_DIRECT	GO:0006914~autophagy	20	1.30039	0.0442293	TRIM12C, SEC16B, SRPX, ITGB4, TEX264, LRRK2, ATG10, TFEB, DEPP1, RAB33B, VAMP8, PINK1, DAP, DRAM1, MAP1LC3A, EVA1A, PMP22, S100A9, S100A8, TRIM12A	1299	193	20094	1.60299	1	0.539424	0.524681
GOTERM_BP_DIRECT	GO:0050873~brown fat cell differentiation	7	0.455137	0.0465037	SELENBP1, CEBPA, LAMA4, RARRES2, DIO2, ADRB1, ADRB2	1299	41	20094	2.64102	1	0.558312	0.543053
GOTERM_BP_DIRECT	GO:0001569~branching involved in blood vessel morphogenesis	7	0.455137	0.0465037	SEMA5A, EDNRA, ANGPT1, LEF1, AHR, TGFBR2, NFATC4	1299	41	20094	2.64102	1	0.558312	0.543053
GOTERM_BP_DIRECT	GO:0043616~keratinocyte proliferation	6	0.390117	0.0467178	FST, TWIST2, CDH13, NFATC1, SFN, WNT16	1299	31	20094	2.99397	1	0.558312	0.543053
GOTERM_BP_DIRECT	GO:0048168~regulation of neuronal synaptic plasticity	6	0.390117	0.0467178	GRIN2A, CPEB1, NOG, CHRD, S100B, GRIN2B	1299	31	20094	2.99397	1	0.558312	0.543053
GOTERM_BP_DIRECT	GO:0031274~positive regulation of pseudopodium assembly	4	0.260078	0.0472366	CDC42EP5, CDC42EP3, CDC42EP2, F2RL1	1299	13	20094	4.75964	1	0.558312	0.543053
GOTERM_BP_DIRECT	GO:0043589~skin morphogenesis	4	0.260078	0.0472366	COL1A1, COL1A2, ITGB4, ITGA2	1299	13	20094	4.75964	1	0.558312	0.543053
GOTERM_BP_DIRECT	GO:0097120~receptor localization to synapse	4	0.260078	0.0472366	NLGN1, RELN, DLG2, NRXN1	1299	13	20094	4.75964	1	0.558312	0.543053
GOTERM_BP_DIRECT	GO:0016331~morphogenesis of embryonic epithelium	4	0.260078	0.0472366	ALDH1A2, TGFB1I1, PCDH8, TBX18	1299	13	20094	4.75964	1	0.558312	0.543053
GOTERM_BP_DIRECT	GO:0097435~supramolecular fiber organization	4	0.260078	0.0472366	MFAP4, COL3A1, COL5A1, LTBP2	1299	13	20094	4.75964	1	0.558312	0.543053
GOTERM_BP_DIRECT	GO:0010459~negative regulation of heart rate	4	0.260078	0.0472366	SPTBN4, FKBP1B, AGTR2, TAC1	1299	13	20094	4.75964	1	0.558312	0.543053
GOTERM_BP_DIRECT	GO:0033689~negative regulation of osteoblast proliferation	4	0.260078	0.0472366	GREM1, NELL1, TNN, AHR	1299	13	20094	4.75964	1	0.558312	0.543053
GOTERM_BP_DIRECT	GO:0008347~glial cell migration	4	0.260078	0.0472366	TGFB2, CD9, CSPG4, MATN2	1299	13	20094	4.75964	1	0.558312	0.543053
GOTERM_BP_DIRECT	GO:0032330~regulation of chondrocyte differentiation	4	0.260078	0.0472366	TRPS1, SHOX2, PRKG2, PTHLH	1299	13	20094	4.75964	1	0.558312	0.543053
GOTERM_BP_DIRECT	GO:0045663~positive regulation of myoblast differentiation	8	0.520156	0.0486645	MYOG, RIPOR2, DUBR, MEF2C, BTG1, IGFBP3, BOC, SMARCA2	1299	52	20094	2.37982	1	0.573826	0.558143
GOTERM_BP_DIRECT	GO:0003180~aortic valve morphogenesis	5	0.325098	0.0499048	ROBO2, EFNA1, HEY2, NFATC1, SLIT3	1299	22	20094	3.51564	1	0.584298	0.568328
GOTERM_BP_DIRECT	GO:1904019~epithelial cell apoptotic process	5	0.325098	0.0499048	BTC, WNT11, HAND2, LEF1, AGAP2	1299	22	20094	3.51564	1	0.584298	0.568328
GOTERM_BP_DIRECT	GO:0042310~vasoconstriction	5	0.325098	0.0499048	EDNRA, CAV1, BDKRB2, HTR1B, AGTR1A	1299	22	20094	3.51564	1	0.584298	0.568328
GOTERM_BP_DIRECT	GO:0001975~response to amphetamine	7	0.455137	0.0514123	PPP3CA, EDNRA, GRIN2A, OXTR, PPP1R1B, SLC1A1, ADRA1B	1299	42	20094	2.57814	1	0.590163	0.574033
GOTERM_BP_DIRECT	GO:0030511~positive regulation of transforming growth factor beta receptor signaling pathway	6	0.390117	0.0525403	CDKN1C, TGFBR3, ZEB2, DAB2, TGFB1I1, ITGA8	1299	32	20094	2.9004	1	0.590163	0.574033
GOTERM_BP_DIRECT	GO:0046597~negative regulation of viral entry into host cell	6	0.390117	0.0525403	TRIM12C, CD74, IFITM1, GSN, PTX3, TRIM12A	1299	32	20094	2.9004	1	0.590163	0.574033
GOTERM_BP_DIRECT	GO:0014012~peripheral nervous system axon regeneration	3	0.195059	0.0525407	MMP2, TNC, APOD	1299	6	20094	7.73441	1	0.590163	0.574033
GOTERM_BP_DIRECT	GO:0060129~thyroid-stimulating hormone-secreting cell differentiation	3	0.195059	0.0525407	BMP2, FGF2, WNT4	1299	6	20094	7.73441	1	0.590163	0.574033
GOTERM_BP_DIRECT	GO:1903215~negative regulation of protein targeting to mitochondrion	3	0.195059	0.0525407	SIAH3, LRRK2, NOL3	1299	6	20094	7.73441	1	0.590163	0.574033
GOTERM_BP_DIRECT	GO:0014051~gamma-aminobutyric acid secretion	3	0.195059	0.0525407	P2RX7, APBA1, GRIK1	1299	6	20094	7.73441	1	0.590163	0.574033
GOTERM_BP_DIRECT	GO:0007567~parturition	3	0.195059	0.0525407	HPGD, NRK, RXFP1	1299	6	20094	7.73441	1	0.590163	0.574033
GOTERM_BP_DIRECT	GO:0045836~positive regulation of meiotic nuclear division	3	0.195059	0.0525407	WNT5A, OOEP, WNT4	1299	6	20094	7.73441	1	0.590163	0.574033
GOTERM_BP_DIRECT	GO:1902083~negative regulation of peptidyl-cysteine S-nitrosylation	3	0.195059	0.0525407	TBC1D24, ATP2B4, SNTA1	1299	6	20094	7.73441	1	0.590163	0.574033
GOTERM_BP_DIRECT	GO:0086015~SA node cell action potential	3	0.195059	0.0525407	GJA5, SCN3B, CACNA1G	1299	6	20094	7.73441	1	0.590163	0.574033
GOTERM_BP_DIRECT	GO:0045163~clustering of voltage-gated potassium channels	3	0.195059	0.0525407	DLG2, KCNB1, KCNIP2	1299	6	20094	7.73441	1	0.590163	0.574033
GOTERM_BP_DIRECT	GO:0048263~determination of dorsal identity	3	0.195059	0.0525407	GREM1, GREM2, NBL1	1299	6	20094	7.73441	1	0.590163	0.574033
GOTERM_BP_DIRECT	GO:0002317~plasma cell differentiation	3	0.195059	0.0525407	LGALS1, BCL6, ITM2A	1299	6	20094	7.73441	1	0.590163	0.574033
GOTERM_BP_DIRECT	GO:0031581~hemidesmosome assembly	3	0.195059	0.0525407	COL17A1, ITGB4, LAMA3	1299	6	20094	7.73441	1	0.590163	0.574033
GOTERM_BP_DIRECT	GO:1904906~positive regulation of endothelial cell-matrix adhesion via fibronectin	3	0.195059	0.0525407	SEC1, FUT1, RIN2	1299	6	20094	7.73441	1	0.590163	0.574033
GOTERM_BP_DIRECT	GO:0005981~regulation of glycogen catabolic process	3	0.195059	0.0525407	PPP1R3C, PPP1R3B, PPP1R3D	1299	6	20094	7.73441	1	0.590163	0.574033
GOTERM_BP_DIRECT	GO:0097119~postsynaptic density protein 95 clustering	3	0.195059	0.0525407	NLGN1, RELN, NRXN1	1299	6	20094	7.73441	1	0.590163	0.574033
GOTERM_BP_DIRECT	GO:0035176~social behavior	9	0.585176	0.0530067	NLGN3, OXTR, BRINP1, ATXN1, GRP, NRXN1, EN1, AVPR1A, SHANK1	1299	64	20094	2.1753	1	0.594057	0.577821
GOTERM_BP_DIRECT	GO:0048661~positive regulation of smooth muscle cell proliferation	11	0.715215	0.0535974	EGR1, NR4A3, STAT1, ITGA2, MMP2, CDH13, PRKCA, PPARGC1A, FGF2, EGFR, TGFBR2	1299	87	20094	1.95583	1	0.599328	0.582948
GOTERM_BP_DIRECT	GO:0055085~transmembrane transport	38	2.47074	0.0552867	SLC44A5, RYR2, SLC44A1, KCNA4, KCNA5, CACNA1C, KCNA6, AQP1, KCNV1, SLC25A29, SV2A, SLC16A7, SLC16A9, TRPM5, GPR155, KCNH3, ABCG5, KCNB1, KCNB2, SLC2A13, ABCA9, SLC4A11, TAP1, SLC5A7, KCNU1, GJB2, TRPV6, KCNS2, TRPV4, GJB6, KCNS3, SLCO4C1, KCNMA1, SLC9A9, SFXN3, SLC26A7, KCNQ5, CFTR	1299	437	20094	1.34511	1	0.616831	0.599972
GOTERM_BP_DIRECT	GO:0009755~hormone-mediated signaling pathway	7	0.455137	0.0566252	GHR, A, NR5A2, THRB, LATS2, THRA, RXFP1	1299	43	20094	2.51818	1	0.622658	0.60564
GOTERM_BP_DIRECT	GO:0019882~antigen processing and presentation	7	0.455137	0.0566252	RAB32, CD74, CD1D1, FLT3, H2-DMA, RAB33A, RELB	1299	43	20094	2.51818	1	0.622658	0.60564
GOTERM_BP_DIRECT	GO:0046627~negative regulation of insulin receptor signaling pathway	7	0.455137	0.0566252	PTPRE, PID1, SOCS1, GRB14, PRKCQ, PRKCA, TNS2	1299	43	20094	2.51818	1	0.622658	0.60564
GOTERM_BP_DIRECT	GO:0060080~inhibitory postsynaptic potential	4	0.260078	0.0573153	NLGN3, INSYN1, ADRB1, GRIK1	1299	14	20094	4.41966	1	0.622658	0.60564
GOTERM_BP_DIRECT	GO:0045059~positive thymic T cell selection	4	0.260078	0.0573153	CD74, ZAP70, CD1D1, H2-DMA	1299	14	20094	4.41966	1	0.622658	0.60564
GOTERM_BP_DIRECT	GO:0003215~cardiac right ventricle morphogenesis	4	0.260078	0.0573153	TGFB2, JAG1, HAND2, HEY2	1299	14	20094	4.41966	1	0.622658	0.60564
GOTERM_BP_DIRECT	GO:0010447~response to acidic pH	4	0.260078	0.0573153	SST, GPR4, ASIC3, CTSS	1299	14	20094	4.41966	1	0.622658	0.60564
GOTERM_BP_DIRECT	GO:2000562~negative regulation of CD4-positive, alpha-beta T cell proliferation	4	0.260078	0.0573153	TNFRSF14, LGALS9, LGALS7, CD44	1299	14	20094	4.41966	1	0.622658	0.60564
GOTERM_BP_DIRECT	GO:0006937~regulation of muscle contraction	5	0.325098	0.0574357	ANXA6, ATP1A2, PRKCA, ADRA1B, SSTR2	1299	23	20094	3.36279	1	0.622658	0.60564
GOTERM_BP_DIRECT	GO:1901214~regulation of neuron death	5	0.325098	0.0574357	GRM7, LRRK2, RAB29, ENO2, CLU	1299	23	20094	3.36279	1	0.622658	0.60564
GOTERM_BP_DIRECT	GO:0043032~positive regulation of macrophage activation	5	0.325098	0.0574357	CEBPA, CD1D1, TNIP2, WNT5A, LGALS9	1299	23	20094	3.36279	1	0.622658	0.60564
GOTERM_BP_DIRECT	GO:0042491~auditory receptor cell differentiation	5	0.325098	0.0574357	JAG1, KCNMA1, FGF20, PCDH15, FGF2	1299	23	20094	3.36279	1	0.622658	0.60564
GOTERM_BP_DIRECT	GO:0003085~negative regulation of systemic arterial blood pressure	5	0.325098	0.0574357	KL, ADORA1, AHR, TAC1, IER3	1299	23	20094	3.36279	1	0.622658	0.60564
GOTERM_BP_DIRECT	GO:0032880~regulation of protein localization	13	0.845254	0.0577627	TRIM12C, PRNP, WNT5A, ARHGDIG, MMD2, TEX15, OOEP, ADCYAP1, BMPER, TRIM46, CAMK1, SGK1, TRIM12A	1299	112	20094	1.79549	1	0.624842	0.607764
GOTERM_BP_DIRECT	GO:0045777~positive regulation of blood pressure	6	0.390117	0.0587656	OXTR, EPHX2, ADORA1, TACR3, AVPR1A, AGTR1A	1299	33	20094	2.81251	1	0.632939	0.61564
GOTERM_BP_DIRECT	GO:0014850~response to muscle activity	6	0.390117	0.0587656	RYR2, ABCG5, POSTN, ITGA2, PPARGC1A, TNS2	1299	33	20094	2.81251	1	0.632939	0.61564
GOTERM_BP_DIRECT	GO:0048146~positive regulation of fibroblast proliferation	10	0.650195	0.0595876	BTC, PDGFRA, CD74, ANXA2, SPHK1, WNT5A, CD248, EGFR, AQP1, FOSL2	1299	77	20094	2.00894	1	0.640406	0.622903
GOTERM_BP_DIRECT	GO:0007015~actin filament organization	16	1.04031	0.0610639	MYO15, TMSB15B1, TPM2, TPM1, PCDH15, EMP2, RHOF, SHROOM1, SORBS3, OOEP, TLE6, SH3D21, TRPV4, RAC3, CTNNA2, CLRN1	1299	150	20094	1.65001	1	0.654857	0.636959
GOTERM_BP_DIRECT	GO:0007224~smoothened signaling pathway	12	0.780234	0.0612104	FOXA1, WNT10B, PTCH2, BOC, NOG, SHOX2, CHRD, GAS1, WNT9A, RUNX2, PTPDC1, TGFBR2	1299	101	20094	1.83788	1	0.655017	0.637115
GOTERM_BP_DIRECT	GO:0007566~embryo implantation	9	0.585176	0.0615573	CALCA, MMP2, EMP2, IGFBP7, MMP9, PCSK5, OOEP, IL11RA1, TGFBR2	1299	66	20094	2.10938	1	0.655908	0.637981
GOTERM_BP_DIRECT	GO:0032731~positive regulation of interleukin-1 beta production	9	0.585176	0.0615573	P2RX7, GSDMD, EGR1, WNT5A, HSPB1, F2RL1, NOD1, TRIM16, IFI202B	1299	66	20094	2.10938	1	0.655908	0.637981
GOTERM_BP_DIRECT	GO:0051649~establishment of localization in cell	20	1.30039	0.0617026	RYR2, CAV1, SLC40A1, GRIK1, CACNA1C, SLC1A6, AK7, RAP1GAP, AQP1, P2RX7, VAMP8, CNN2, PINK1, KCNU1, AXL, LRRTM1, APBA1, ASIC3, PDZD7, CFTR	1299	201	20094	1.53919	1	0.656036	0.638106
GOTERM_BP_DIRECT	GO:0045892~negative regulation of transcription, DNA-templated	54	3.51105	0.061833	CDKN1C, ZFP488, THRB, THRA, NAB2, SCX, CHD3, AHR, NR3C1, LOXL2, A430033K04RIK, SOX18, CREB3L1, TRPS1, HEY2, TRIM66, EID2B, TLE2, WNT5A, SOX10, RUNX2, DKK3, RUNX1, GREM1, EID1, AR, PAX9, ATF5, CEBPA, CALCA, CEBPD, TSHZ3, TMPRSS6, LEF1, TWIST2, PRICKLE1, ZBTB4, RELB, WNT11, ATXN1, ALX1, MSX1, WNT4, RUNX1T1, CBX4, IRX6, KCNIP3, KLF4, SMARCA2, DAP, BMP2, BCL6, NFIC, MXD3	1299	662	20094	1.26181	1	0.656036	0.638106
GOTERM_BP_DIRECT	GO:2001237~negative regulation of extrinsic apoptotic signaling pathway	7	0.455137	0.062144	LGALS3, AR, DAB2, SIAH2, LMNA, NOL3, SCG2	1299	44	20094	2.46095	1	0.656536	0.638592
GOTERM_BP_DIRECT	GO:0045582~positive regulation of T cell differentiation	7	0.455137	0.062144	CD74, WNT10B, ZAP70, IL1RL2, H2-DMA, SMARCA2, RAG1	1299	44	20094	2.46095	1	0.656536	0.638592
GOTERM_BP_DIRECT	GO:1902476~chloride transmembrane transport	8	0.520156	0.0626421	GABRA2, GABRP, GABRA1, GABRB1, GABRA4, SLC1A1, GABRG3, CFTR	1299	55	20094	2.25001	1	0.660397	0.642347
GOTERM_BP_DIRECT	GO:0070301~cellular response to hydrogen peroxide	10	0.650195	0.0636854	CBX8, EDNRA, ANXA1, MAP1LC3A, AXL, SPHK1, LCN2, CAPN1, KLF4, AQP1	1299	78	20094	1.98318	1	0.669975	0.651664
GOTERM_BP_DIRECT	GO:0031424~keratinization	11	0.715215	0.0646501	TGM1, KRT80, KRT17, KRT1, SFN, KRT5, KRT75, SPRR1A, PPL, EVPL, KRT6A	1299	90	20094	1.89063	1	0.677996	0.659466
GOTERM_BP_DIRECT	GO:1904706~negative regulation of vascular smooth muscle cell proliferation	6	0.390117	0.0653931	RGS5, EFEMP2, MEF2C, TGFB3, CAV1, TPM1	1299	34	20094	2.72979	1	0.677996	0.659466
GOTERM_BP_DIRECT	GO:0007190~activation of adenylate cyclase activity	5	0.325098	0.0655378	ADCYAP1, CALCA, ADCY2, ADRB2, RXFP1	1299	24	20094	3.22267	1	0.677996	0.659466
GOTERM_BP_DIRECT	GO:0030902~hindbrain development	5	0.325098	0.0655378	NFIB, ALDH1A2, EN1, SMAD9, HOXA1	1299	24	20094	3.22267	1	0.677996	0.659466
GOTERM_BP_DIRECT	GO:0006939~smooth muscle contraction	5	0.325098	0.0655378	CALCA, FKBP1B, BDKRB2, CACNA1C, ADRB2	1299	24	20094	3.22267	1	0.677996	0.659466
GOTERM_BP_DIRECT	GO:0061001~regulation of dendritic spine morphogenesis	5	0.325098	0.0655378	NLGN3, DNM3, LRRK2, ABI3BP, PPFIA2	1299	24	20094	3.22267	1	0.677996	0.659466
GOTERM_BP_DIRECT	GO:0017015~regulation of transforming growth factor beta receptor signaling pathway	5	0.325098	0.0655378	TGFBR3, LATS2, LOX, NREP, DAND5	1299	24	20094	3.22267	1	0.677996	0.659466
GOTERM_BP_DIRECT	GO:0007274~neuromuscular synaptic transmission	5	0.325098	0.0655378	SLC5A7, RAB3A, CHRM1, NTF3, TBC1D24	1299	24	20094	3.22267	1	0.677996	0.659466
GOTERM_BP_DIRECT	GO:0071549~cellular response to dexamethasone stimulus	7	0.455137	0.067969	GJB2, DDIT4, AGTR2, NR3C1, EGFR, AGTR1A, AQP1	1299	45	20094	2.40626	1	0.689527	0.670682
GOTERM_BP_DIRECT	GO:0071345~cellular response to cytokine stimulus	7	0.455137	0.067969	NFKBIA, PID1, SOCS1, MME, STAT1, FLT3, LEF1	1299	45	20094	2.40626	1	0.689527	0.670682
GOTERM_BP_DIRECT	GO:0003181~atrioventricular valve morphogenesis	4	0.260078	0.0683153	TGFB2, BMP2, SLIT3, TGFBR2	1299	15	20094	4.12502	1	0.689527	0.670682
GOTERM_BP_DIRECT	GO:0060993~kidney morphogenesis	4	0.260078	0.0683153	TSHZ3, AHR, AGTR2, WNT4	1299	15	20094	4.12502	1	0.689527	0.670682
GOTERM_BP_DIRECT	GO:2001046~positive regulation of integrin-mediated signaling pathway	4	0.260078	0.0683153	DAB2, LAMA2, EMP2, PCSK5	1299	15	20094	4.12502	1	0.689527	0.670682
GOTERM_BP_DIRECT	GO:0060347~heart trabecula formation	4	0.260078	0.0683153	TGFBR3, ADGRG6, HEY2, FHL2	1299	15	20094	4.12502	1	0.689527	0.670682
GOTERM_BP_DIRECT	GO:0032482~Rab protein signal transduction	4	0.260078	0.0683153	RAB30, AATK, RAB33A, RAB33B	1299	15	20094	4.12502	1	0.689527	0.670682
GOTERM_BP_DIRECT	GO:0043586~tongue development	4	0.260078	0.0683153	WNT10A, HAND2, LEF1, EGFR	1299	15	20094	4.12502	1	0.689527	0.670682
GOTERM_BP_DIRECT	GO:0035815~positive regulation of renal sodium excretion	4	0.260078	0.0683153	PTGER4, AGTR2, AVPR1A, TAC1	1299	15	20094	4.12502	1	0.689527	0.670682
GOTERM_BP_DIRECT	GO:0006518~peptide metabolic process	4	0.260078	0.0683153	MME, CPXM2, CPE, PAM	1299	15	20094	4.12502	1	0.689527	0.670682
GOTERM_BP_DIRECT	GO:0043117~positive regulation of vascular permeability	4	0.260078	0.0683153	TRPV4, PDE3A, CAPN1, BMP6	1299	15	20094	4.12502	1	0.689527	0.670682
GOTERM_BP_DIRECT	GO:0035810~positive regulation of urine volume	4	0.260078	0.0683153	PTGER4, BTC, NPR3, PTGER3	1299	15	20094	4.12502	1	0.689527	0.670682
GOTERM_BP_DIRECT	GO:0051260~protein homooligomerization	14	0.910273	0.070175	GSDMD, RIPOR2, PRNP, KCNB1, KCNB2, KCNA4, KCNA5, KCNA6, ADCY8, KCNV1, KCNS2, KCNS3, KCTD14, KCTD12	1299	128	20094	1.6919	1	0.690227	0.671363
GOTERM_BP_DIRECT	GO:0051798~positive regulation of hair follicle development	3	0.195059	0.0704653	KRT17, FST, HPSE	1299	7	20094	6.6295	1	0.690227	0.671363
GOTERM_BP_DIRECT	GO:0016264~gap junction assembly	3	0.195059	0.0704653	GJB2, GJA5, GJB6	1299	7	20094	6.6295	1	0.690227	0.671363
GOTERM_BP_DIRECT	GO:0042985~negative regulation of amyloid precursor protein biosynthetic process	3	0.195059	0.0704653	BACE2, ITM2A, ITM2B	1299	7	20094	6.6295	1	0.690227	0.671363
GOTERM_BP_DIRECT	GO:0001957~intramembranous ossification	3	0.195059	0.0704653	COL1A1, CTSK, MMP2	1299	7	20094	6.6295	1	0.690227	0.671363
GOTERM_BP_DIRECT	GO:1905949~negative regulation of calcium ion import across plasma membrane	3	0.195059	0.0704653	PPP3CA, PPP3CC, CAV1	1299	7	20094	6.6295	1	0.690227	0.671363
GOTERM_BP_DIRECT	GO:0071229~cellular response to acid chemical	3	0.195059	0.0704653	ANXA2, NGF, S100A10	1299	7	20094	6.6295	1	0.690227	0.671363
GOTERM_BP_DIRECT	GO:1901842~negative regulation of high voltage-gated calcium channel activity	3	0.195059	0.0704653	REM1, RRAD, GEM	1299	7	20094	6.6295	1	0.690227	0.671363
GOTERM_BP_DIRECT	GO:0044691~tooth eruption	3	0.195059	0.0704653	COL1A1, ADAMTS5, FAM20A	1299	7	20094	6.6295	1	0.690227	0.671363
GOTERM_BP_DIRECT	GO:0045794~negative regulation of cell volume	3	0.195059	0.0704653	P2RX7, KCNMA1, PRKG2	1299	7	20094	6.6295	1	0.690227	0.671363
GOTERM_BP_DIRECT	GO:0010544~negative regulation of platelet activation	3	0.195059	0.0704653	PDGFRA, C1QTNF1, SERPINE2	1299	7	20094	6.6295	1	0.690227	0.671363
GOTERM_BP_DIRECT	GO:0033591~response to L-ascorbic acid	3	0.195059	0.0704653	SPARC, ITGA2, RUNX2	1299	7	20094	6.6295	1	0.690227	0.671363
GOTERM_BP_DIRECT	GO:0048570~notochord morphogenesis	3	0.195059	0.0704653	WNT11, WNT5A, NOG	1299	7	20094	6.6295	1	0.690227	0.671363
GOTERM_BP_DIRECT	GO:0086014~atrial cardiac muscle cell action potential	3	0.195059	0.0704653	KCNE1L, KCNA5, SCN3B	1299	7	20094	6.6295	1	0.690227	0.671363
GOTERM_BP_DIRECT	GO:0001765~membrane raft assembly	3	0.195059	0.0704653	ANXA2, EMP2, S100A10	1299	7	20094	6.6295	1	0.690227	0.671363
GOTERM_BP_DIRECT	GO:0035116~embryonic hindlimb morphogenesis	6	0.390117	0.07242	OSR2, OSR1, RSPO2, MSX1, AFF3, TBX4	1299	35	20094	2.6518	1	0.70246	0.683261
GOTERM_BP_DIRECT	GO:0045671~negative regulation of osteoclast differentiation	6	0.390117	0.07242	CALCA, MAFB, LRRC17, TNFRSF11B, CLEC2D, FBN1	1299	35	20094	2.6518	1	0.70246	0.683261
GOTERM_BP_DIRECT	GO:0061436~establishment of skin barrier	6	0.390117	0.07242	CYP26B1, KRT1, SFN, GRHL1, KLF4, CLDN1	1299	35	20094	2.6518	1	0.70246	0.683261
GOTERM_BP_DIRECT	GO:0030099~myeloid cell differentiation	6	0.390117	0.07242	CDKN1C, CEBPA, ZFP36, DAB2, TWIST2, RUNX1	1299	35	20094	2.6518	1	0.70246	0.683261
GOTERM_BP_DIRECT	GO:0055001~muscle cell development	6	0.390117	0.07242	LOX, MYOF, WFIKKN2, PMP22, FLNC, NFATC4	1299	35	20094	2.6518	1	0.70246	0.683261
GOTERM_BP_DIRECT	GO:0030336~negative regulation of cell migration	16	1.04031	0.0731334	PTPRT, CD74, IFITM1, JAG1, MAGI2, NOG, TPM1, CHRD, PTN, THY1, LDLRAD4, KLF4, CNN2, ACAN, WNT11, WNT4	1299	154	20094	1.60715	1	0.70577	0.686481
GOTERM_BP_DIRECT	GO:0050877~neurological system process	8	0.520156	0.0731868	GABRA2, GABRP, GABRA1, GABRB1, CHRNA5, GRM7, GABRA4, GABRG3	1299	57	20094	2.17106	1	0.70577	0.686481
GOTERM_BP_DIRECT	GO:0048709~oligodendrocyte differentiation	8	0.520156	0.0731868	NLGN3, NTRK2, LINGO1, GPR17, DUSP10, CDKN2C, SOX10, NKX2-2OS	1299	57	20094	2.17106	1	0.70577	0.686481
GOTERM_BP_DIRECT	GO:0007130~synaptonemal complex assembly	5	0.325098	0.0742004	CPEB1, AGO4, TEX11, MEIOC, TEX15	1299	25	20094	3.09376	1	0.708678	0.689309
GOTERM_BP_DIRECT	GO:0046928~regulation of neurotransmitter secretion	5	0.325098	0.0742004	NTRK2, MEF2C, GRM8, NGF, CPLX2	1299	25	20094	3.09376	1	0.708678	0.689309
GOTERM_BP_DIRECT	GO:0035567~non-canonical Wnt signaling pathway	5	0.325098	0.0742004	WNT11, WNT5A, FZD9, FZD10, WNT4	1299	25	20094	3.09376	1	0.708678	0.689309
GOTERM_BP_DIRECT	GO:0010613~positive regulation of cardiac muscle hypertrophy	5	0.325098	0.0742004	PPP3CA, MEF2C, NR4A3, HAND2, PRKCA	1299	25	20094	3.09376	1	0.708678	0.689309
GOTERM_BP_DIRECT	GO:0032502~developmental process	5	0.325098	0.0742004	HAND2, TCF24, TWIST2, SCX, IL11RA1	1299	25	20094	3.09376	1	0.708678	0.689309
GOTERM_BP_DIRECT	GO:0045668~negative regulation of osteoblast differentiation	9	0.585176	0.075914	GDF10, GREM1, TNN, HAND2, NOG, TWIST2, CHRD, NFATC1, AHR	1299	69	20094	2.01767	1	0.723655	0.703877
GOTERM_BP_DIRECT	GO:0045471~response to ethanol	14	0.910273	0.0772523	GSN, SPARC, HPGD, TNC, HTR1B, PRKCA, ADH7, CLDN1, GRIN2B, ADCYAP1, GRIN2A, TBXAS1, PENK, CDO1	1299	130	20094	1.66587	1	0.735004	0.714916
GOTERM_BP_DIRECT	GO:0001756~somitogenesis	8	0.520156	0.0788285	IFITM1, ZEB2, WNT3A, WNT5A, PCDH8, LEF1, TBX18, PAX1	1299	58	20094	2.13363	1	0.745833	0.725449
GOTERM_BP_DIRECT	GO:0048167~regulation of synaptic plasticity	8	0.520156	0.0788285	JPH4, GRIN2A, MEF2C, CALB1, PLK2, PTN, GRIN2B, NFATC4	1299	58	20094	2.13363	1	0.745833	0.725449
GOTERM_BP_DIRECT	GO:0070555~response to interleukin-1	6	0.390117	0.0798423	GHR, ANXA1, IL1R1, CHIL1, IRAK3, PRKCA	1299	36	20094	2.57814	1	0.745833	0.725449
GOTERM_BP_DIRECT	GO:0043392~negative regulation of DNA binding	6	0.390117	0.0798423	NFIB, HAND2, LEF1, WFIKKN2, TWIST2, MSX1	1299	36	20094	2.57814	1	0.745833	0.725449
GOTERM_BP_DIRECT	GO:0060999~positive regulation of dendritic spine development	6	0.390117	0.0798423	NLGN3, NLGN1, FOXO6, CAMK1, NR3C1, SHANK1	1299	36	20094	2.57814	1	0.745833	0.725449
GOTERM_BP_DIRECT	GO:0048771~tissue remodeling	4	0.260078	0.0801891	MMP14, MMP2, CSPG4, MMP9	1299	16	20094	3.86721	1	0.745833	0.725449
GOTERM_BP_DIRECT	GO:0006940~regulation of smooth muscle contraction	4	0.260078	0.0801891	CAV1, ATP1A2, ADRB2, ADRA2A	1299	16	20094	3.86721	1	0.745833	0.725449
GOTERM_BP_DIRECT	GO:0032270~positive regulation of cellular protein metabolic process	4	0.260078	0.0801891	NFKBIA, INHBA, KLF4, AGTR1A	1299	16	20094	3.86721	1	0.745833	0.725449
GOTERM_BP_DIRECT	GO:0060402~calcium ion transport into cytosol	4	0.260078	0.0801891	RYR2, CACNA2D1, CACNA1C, CACNA1G	1299	16	20094	3.86721	1	0.745833	0.725449
GOTERM_BP_DIRECT	GO:0035235~ionotropic glutamate receptor signaling pathway	4	0.260078	0.0801891	GRIA2, GRIN2A, GRIK1, GRIN2B	1299	16	20094	3.86721	1	0.745833	0.725449
GOTERM_BP_DIRECT	GO:0061337~cardiac conduction	4	0.260078	0.0801891	SPTBN4, GJA5, CACNA1C, SCN3B	1299	16	20094	3.86721	1	0.745833	0.725449
GOTERM_BP_DIRECT	GO:0045820~negative regulation of glycolytic process	4	0.260078	0.0801891	MYOG, DDIT4, PPARGC1A, IER3	1299	16	20094	3.86721	1	0.745833	0.725449
GOTERM_BP_DIRECT	GO:0042177~negative regulation of protein catabolic process	7	0.455137	0.0805351	NELL1, GRIN2A, SERPINE2, AGAP2, AZIN2, IRAK3, EGFR	1299	47	20094	2.30387	1	0.747655	0.72722
GOTERM_BP_DIRECT	GO:0048863~stem cell differentiation	9	0.585176	0.0811105	OSR1, KRT14, NOG, PRKCA, KRT10, MSX1, FGF2, RUNX2, TBX18	1299	70	20094	1.98885	1	0.751594	0.731052
GOTERM_BP_DIRECT	GO:0043406~positive regulation of MAP kinase activity	10	0.650195	0.081827	P2RX7, GHR, MEF2C, LRRK2, NTF3, HTR2A, MST1R, FGF2, EGFR, ADRA2A	1299	82	20094	1.88644	1	0.755419	0.734773
GOTERM_BP_DIRECT	GO:0032091~negative regulation of protein binding	10	0.650195	0.081827	CKMT1, DAB2, SLPI, LRRK2, CAV1, WFIKKN2, CAMK1, DKK1, DACT1, NFATC4	1299	82	20094	1.88644	1	0.755419	0.734773
GOTERM_BP_DIRECT	GO:0007009~plasma membrane organization	5	0.325098	0.0834095	P2RX7, BAIAP2L2, MYOF, TLCD2, FAT4	1299	26	20094	2.97477	1	0.762952	0.742099
GOTERM_BP_DIRECT	GO:0046847~filopodium assembly	5	0.325098	0.0834095	DNM3, SPEF1, TGFB3, ITGB4, NRXN1	1299	26	20094	2.97477	1	0.762952	0.742099
GOTERM_BP_DIRECT	GO:0030031~cell projection assembly	5	0.325098	0.0834095	SCIN, GSN, RAC3, CAPG, RHOV	1299	26	20094	2.97477	1	0.762952	0.742099
GOTERM_BP_DIRECT	GO:0095500~acetylcholine receptor signaling pathway	5	0.325098	0.0834095	LY6C2, LYPD1, LY6A, LY6H, LY6C1	1299	26	20094	2.97477	1	0.762952	0.742099
GOTERM_BP_DIRECT	GO:0048266~behavioral response to pain	5	0.325098	0.0834095	KCNIP3, GRIK1, GRIN2B, PIRT, RUNX1	1299	26	20094	2.97477	1	0.762952	0.742099
GOTERM_BP_DIRECT	GO:0018105~peptidyl-serine phosphorylation	18	1.17035	0.0838067	NTRK2, PNCK, CAMK1D, LRRK2, PLK2, SLC1A1, DCLK3, PRKCA, DCLK1, TGFBR2, RPS6KA4, PINK1, LATS2, PRKCQ, CAMK1, SGK1, STK32B, PDK2	1299	183	20094	1.52152	1	0.765178	0.744265
GOTERM_BP_DIRECT	GO:0007200~phospholipase C-activating G-protein coupled receptor signaling pathway	8	0.520156	0.0847157	NPR3, PTGER3, GPR4, HTR2A, PTH1R, ADRA1B, HCRTR2, AGTR1A	1299	59	20094	2.09747	1	0.772061	0.75096
GOTERM_BP_DIRECT	GO:0051384~response to glucocorticoid	9	0.585176	0.0865125	GHR, SPARC, FAS, ALPL, CDO1, S100B, PTGDS, PAM, BMP6	1299	71	20094	1.96084	1	0.785559	0.764089
GOTERM_BP_DIRECT	GO:0045860~positive regulation of protein kinase activity	9	0.585176	0.0865125	ADCYAP1, RELN, SDC4, WNT3A, LRRK2, WNT5A, AGAP2, MMD2, VLDLR	1299	71	20094	1.96084	1	0.785559	0.764089
GOTERM_BP_DIRECT	GO:0010259~multicellular organism aging	6	0.390117	0.0876541	EDNRA, PMP22, ALPL, AVPR1A, ADRA1B, AGTR1A	1299	37	20094	2.50846	1	0.794475	0.772761
GOTERM_BP_DIRECT	GO:0048341~paraxial mesoderm formation	3	0.195059	0.0900282	WNT11, WNT5A, LEF1	1299	8	20094	5.80081	1	0.797118	0.775332
GOTERM_BP_DIRECT	GO:0051205~protein insertion into membrane	3	0.195059	0.0900282	RTP4, RTP2, RTP1	1299	8	20094	5.80081	1	0.797118	0.775332
GOTERM_BP_DIRECT	GO:0030913~paranodal junction assembly	3	0.195059	0.0900282	EPB41L3, PMP22, CD9	1299	8	20094	5.80081	1	0.797118	0.775332
GOTERM_BP_DIRECT	GO:0097720~calcineurin-mediated signaling	3	0.195059	0.0900282	PPP3CA, PPP3CC, NR5A2	1299	8	20094	5.80081	1	0.797118	0.775332
GOTERM_BP_DIRECT	GO:0051775~response to redox state	3	0.195059	0.0900282	RYR2, FKBP1B, NPAS2	1299	8	20094	5.80081	1	0.797118	0.775332
GOTERM_BP_DIRECT	GO:2000809~positive regulation of synaptic vesicle clustering	3	0.195059	0.0900282	NLGN3, NLGN1, MAGI2	1299	8	20094	5.80081	1	0.797118	0.775332
GOTERM_BP_DIRECT	GO:0003158~endothelium development	3	0.195059	0.0900282	GJA5, GJA4, SLC40A1	1299	8	20094	5.80081	1	0.797118	0.775332
GOTERM_BP_DIRECT	GO:0060087~relaxation of vascular smooth muscle	3	0.195059	0.0900282	GUCY1A1, KCNMA1, ADORA1	1299	8	20094	5.80081	1	0.797118	0.775332
GOTERM_BP_DIRECT	GO:2000543~positive regulation of gastrulation	3	0.195059	0.0900282	OSR2, OSR1, SCX	1299	8	20094	5.80081	1	0.797118	0.775332
GOTERM_BP_DIRECT	GO:0045986~negative regulation of smooth muscle contraction	3	0.195059	0.0900282	CALCA, ADRB1, ADRB2	1299	8	20094	5.80081	1	0.797118	0.775332
GOTERM_BP_DIRECT	GO:0061743~motor learning	3	0.195059	0.0900282	ADGRB3, EN1, DKK1	1299	8	20094	5.80081	1	0.797118	0.775332
GOTERM_BP_DIRECT	GO:0031346~positive regulation of cell projection organization	3	0.195059	0.0900282	EFEMP1, ITGA2, LCN2	1299	8	20094	5.80081	1	0.797118	0.775332
GOTERM_BP_DIRECT	GO:0003179~heart valve morphogenesis	3	0.195059	0.0900282	TGFB2, SCX, NFATC1	1299	8	20094	5.80081	1	0.797118	0.775332
GOTERM_BP_DIRECT	GO:0001558~regulation of cell growth	8	0.520156	0.0908471	IGFBP3, PTCH2, EPB41L3, TNC, IGFBP7, KAZALD1, FBLN5, CD44	1299	60	20094	2.06251	1	0.800531	0.778651
GOTERM_BP_DIRECT	GO:0002931~response to ischemia	8	0.520156	0.0908471	EGR1, GJB2, MEF2C, PINK1, CAV1, NDNF, NOL3, PPARGC1A	1299	60	20094	2.06251	1	0.800531	0.778651
GOTERM_BP_DIRECT	GO:0007612~learning	9	0.585176	0.0921192	NLGN3, JPH4, NTRK2, GRIN2A, RELN, ATXN1, NRXN1, PTN, GRIN2B	1299	72	20094	1.9336	1	0.800531	0.778651
GOTERM_BP_DIRECT	GO:0021675~nerve development	4	0.260078	0.0928839	NRP2, NTF3, NRTN, NGF	1299	17	20094	3.63972	1	0.800531	0.778651
GOTERM_BP_DIRECT	GO:0001967~suckling behavior	4	0.260078	0.0928839	CNTFR, OXTR, HAND2, GRIN2B	1299	17	20094	3.63972	1	0.800531	0.778651
GOTERM_BP_DIRECT	GO:0042711~maternal behavior	4	0.260078	0.0928839	OXTR, BRINP1, AVPR1A, NR3C1	1299	17	20094	3.63972	1	0.800531	0.778651
GOTERM_BP_DIRECT	GO:0010633~negative regulation of epithelial cell migration	4	0.260078	0.0928839	TGFBR3, PTPRR, DUSP10, TACSTD2	1299	17	20094	3.63972	1	0.800531	0.778651
GOTERM_BP_DIRECT	GO:0032026~response to magnesium ion	4	0.260078	0.0928839	RYR2, KCNIP3, TNFRSF11B, BMP6	1299	17	20094	3.63972	1	0.800531	0.778651
GOTERM_BP_DIRECT	GO:0097067~cellular response to thyroid hormone stimulus	4	0.260078	0.0928839	THRB, CTSH, PPARGC1A, CTSS	1299	17	20094	3.63972	1	0.800531	0.778651
GOTERM_BP_DIRECT	GO:0002024~diet induced thermogenesis	4	0.260078	0.0928839	MC4R, TRPV4, ADRB1, ADRB2	1299	17	20094	3.63972	1	0.800531	0.778651
GOTERM_BP_DIRECT	GO:0071880~adenylate cyclase-activating adrenergic receptor signaling pathway	4	0.260078	0.0928839	ADRB1, ADRB2, ADRA1B, ADRA2A	1299	17	20094	3.63972	1	0.800531	0.778651
GOTERM_BP_DIRECT	GO:0001921~positive regulation of receptor recycling	4	0.260078	0.0928839	DAB2, ANXA2, RAB29, AGTR1A	1299	17	20094	3.63972	1	0.800531	0.778651
GOTERM_BP_DIRECT	GO:0060259~regulation of feeding behavior	4	0.260078	0.0928839	MC4R, HTR1A, LEPR, TACR3	1299	17	20094	3.63972	1	0.800531	0.778651
GOTERM_BP_DIRECT	GO:0032753~positive regulation of interleukin-4 production	5	0.325098	0.0931486	CD1D2, H2-T23, CD1D1, PRKCQ, IL1RAP	1299	27	20094	2.8646	1	0.800531	0.778651
GOTERM_BP_DIRECT	GO:0048598~embryonic morphogenesis	5	0.325098	0.0931486	ZEB2, SHOX2, GAS1, MSX1, DACT1	1299	27	20094	2.8646	1	0.800531	0.778651
GOTERM_BP_DIRECT	GO:0022409~positive regulation of cell-cell adhesion	5	0.325098	0.0931486	KIF26B, WNT5A, LEF1, TBX18, RAP1GAP	1299	27	20094	2.8646	1	0.800531	0.778651
GOTERM_BP_DIRECT	GO:0043129~surfactant homeostasis	5	0.325098	0.0931486	RCN3, FGF7, CTSH, ITGB6, PTHLH	1299	27	20094	2.8646	1	0.800531	0.778651
GOTERM_BP_DIRECT	GO:0071346~cellular response to interferon-gamma	12	0.780234	0.0937204	VAMP8, GM10591, GSN, STAT1, WNT5A, MRC1, CDC42EP2, CAPG, VIM, CLDN1, STX11, RAB11FIP5	1299	109	20094	1.70299	1	0.804056	0.78208
GOTERM_BP_DIRECT	GO:0048813~dendrite morphogenesis	7	0.455137	0.0943083	PPP3CA, SDC2, CTNNA2, VLDLR, DCLK1, DACT1, NFATC4	1299	49	20094	2.20983	1	0.80632	0.784282
GOTERM_BP_DIRECT	GO:0008306~associative learning	7	0.455137	0.0943083	RELN, GRM7, ADRB2, TAC1, GRIN2B, SHANK1, NRGN	1299	49	20094	2.20983	1	0.80632	0.784282
GOTERM_BP_DIRECT	GO:0006887~exocytosis	13	0.845254	0.0956564	RAB3A, KCNB1, RAB3D, LGI3, SYT16, LIN7A, DOC2B, CPLX2, PRSS12, STX11, BAIAP3, NKD2, HCK	1299	122	20094	1.64832	1	0.816443	0.794129
GOTERM_BP_DIRECT	GO:0071310~cellular response to organic substance	6	0.390117	0.0958481	EGR1, WNT10B, EDNRA, CALB1, LOX, TIMP2	1299	38	20094	2.44245	1	0.816551	0.794233
GOTERM_BP_DIRECT	GO:0007166~cell surface receptor signaling pathway	20	1.30039	0.0959972	RTN4R, ANXA1, CTF1, FCRL6, FCRLS, FZD9, FZD10, PTH1R, EGFR, P2RX7, ADGRG2, ADGRB2, ADGRE5, ADGRB3, CLCF1, ADGRG6, NCAM1, AGTR2, PAPPA2, ADGRL3	1299	213	20094	1.45247	1	0.816551	0.794233
GOTERM_BP_DIRECT	GO:0008584~male gonad development	14	0.910273	0.0968869	NCOA1, TGFB2, TESC, TEX11, WNT5A, ATN1, ARID5B, INHBA, NHLH2, AR, MMP14, AGO4, COL9A3, WNT4	1299	135	20094	1.60417	1	0.822712	0.800227
GOTERM_BP_DIRECT	GO:0043154~negative regulation of cysteine-type endopeptidase activity involved in apoptotic process	9	0.585176	0.0979296	SIAH2, SFN, WNT9A, NOL3, IFI202B, KLF4, CD44, AQP1, RAG1	1299	73	20094	1.90712	1	0.83015	0.807461

## Sheet: GO-E12 5vsgroupE11 5_deg_down
Category	Term	Count	%	PValue	Genes	List Total	Pop Hits	Pop Total	Fold Enrichment	Bonferroni	Benjamini	FDR
GOTERM_BP_DIRECT	GO:0048821~erythrocyte development	6	4.02685	1.2882e-06	SLC4A1, RHAG, ANK1, GATA1, RHD, KLF1	122	32	20094	30.8822	0.00126422	0.00126501	0.00126373
GOTERM_BP_DIRECT	GO:0007275~multicellular organism development	19	12.7517	9.67162e-05	RET, TRIM71, HEMGN, CRB2, COL13A1, HSPA1L, EPHA8, FZD4, GREB1, SHISA3, VEGFD, ARID3B, GDF6, PRTG, FGF17, FGF8, DACH1, NEUROD4, TLX2	122	1095	20094	2.85789	0.0906088	0.0474876	0.0474393
GOTERM_BP_DIRECT	GO:0098662~inorganic cation transmembrane transport	4	2.68456	0.000192347	P2RX3, RHAG, HTR3B, ANK1	122	19	20094	34.6747	0.172133	0.0629616	0.0628975
GOTERM_BP_DIRECT	GO:0035116~embryonic hindlimb morphogenesis	4	2.68456	0.00121111	FGF8, ZBTB16, CHD7, RARB	122	35	20094	18.8234	0.695787	0.297327	0.297024
GOTERM_BP_DIRECT	GO:0006779~porphyrin-containing compound biosynthetic process	3	2.01342	0.00268592	SPTA1, SPTB, ANK1	122	13	20094	38.0088	0.928719	0.527515	0.526978
GOTERM_BP_DIRECT	GO:0021915~neural tube development	4	2.68456	0.00444864	TRIM71, CECR2, SALL1, SALL4	122	55	20094	11.9785	0.987453	0.634121	0.633475
GOTERM_BP_DIRECT	GO:0045666~positive regulation of neuron differentiation	5	3.3557	0.00471275	TRPC6, LIN28A, SALL1, GDF6, ADRA2B	122	112	20094	7.3529	0.990331	0.634121	0.633475
GOTERM_BP_DIRECT	GO:0048566~embryonic digestive tract development	3	2.01342	0.00516596	SALL1, RARB, STRA6	122	18	20094	27.4508	0.993818	0.634121	0.633475
GOTERM_BP_DIRECT	GO:0001501~skeletal system development	5	3.3557	0.00600881	COL13A1, ZBTB16, CHD7, BMPR1B, ACVR2B	122	120	20094	6.8627	0.997311	0.655628	0.65496
GOTERM_BP_DIRECT	GO:0032332~positive regulation of chondrocyte differentiation	3	2.01342	0.00700752	ZBTB16, BMPR1B, GDF6	122	21	20094	23.5293	0.998998	0.688139	0.687438
GOTERM_BP_DIRECT	GO:0043010~camera-type eye development	4	2.68456	0.0124995	NEUROD4, CHD7, BMPR1B, STRA6	122	80	20094	8.23525	0.999996	0.975411	0.974418
GOTERM_BP_DIRECT	GO:0010800~positive regulation of peptidyl-threonine phosphorylation	3	2.01342	0.0149212	CEMIP, TRIM6, TRPC6	122	31	20094	15.9392	1	0.975411	0.974418
GOTERM_BP_DIRECT	GO:0060348~bone development	4	2.68456	0.0151712	FGF8, RARB, BMPR1B, PHEX	122	86	20094	7.66069	1	0.975411	0.974418
GOTERM_BP_DIRECT	GO:0030182~neuron differentiation	6	4.02685	0.0164092	RET, FGF8, NEUROD4, TRPC6, SALL1, IRX6	122	245	20094	4.03359	1	0.975411	0.974418
GOTERM_BP_DIRECT	GO:0060041~retina development in camera-type eye	4	2.68456	0.0166186	RET, NEUROD4, CHD7, BMPR1B	122	89	20094	7.40247	1	0.975411	0.974418
GOTERM_BP_DIRECT	GO:0030097~hemopoiesis	4	2.68456	0.0176251	SPTA1, ZBTB16, MPL, SPTB	122	91	20094	7.23978	1	0.975411	0.974418
GOTERM_BP_DIRECT	GO:0061146~Peyer's patch morphogenesis	2	1.34228	0.0179574	RET, FOXL1	122	3	20094	109.803	1	0.975411	0.974418
GOTERM_BP_DIRECT	GO:0021553~olfactory nerve development	2	1.34228	0.0179574	SALL1, CHD7	122	3	20094	109.803	1	0.975411	0.974418
GOTERM_BP_DIRECT	GO:0008283~cell proliferation	7	4.69799	0.0188725	FGF8, IL18RAP, DACH1, ZBTB16, RARB, VEGFD, GATA1	122	348	20094	3.31303	1	0.975411	0.974418
GOTERM_BP_DIRECT	GO:0001843~neural tube closure	4	2.68456	0.0237587	TRIM71, CECR2, SALL1, SALL4	122	102	20094	6.45902	1	1	1
GOTERM_BP_DIRECT	GO:0007605~sensory perception of sound	6	4.02685	0.0251754	CEMIP, FZD4, CHD7, PKHD1L1, CRYM, SLC26A5	122	274	20094	3.60668	1	1	1
GOTERM_BP_DIRECT	GO:0003281~ventricular septum development	3	2.01342	0.0253076	SALL1, SALL4, STRA6	122	41	20094	12.0516	1	1	1
GOTERM_BP_DIRECT	GO:0097272~ammonia homeostasis	2	1.34228	0.029751	RHAG, RHD	122	5	20094	65.882	1	1	1
GOTERM_BP_DIRECT	GO:0042391~regulation of membrane potential	4	2.68456	0.033029	RIMS4, CHRNA7, HTR3B, SLC26A5	122	116	20094	5.67948	1	1	1
GOTERM_BP_DIRECT	GO:0000122~negative regulation of transcription from RNA polymerase II promoter	12	8.05369	0.0332678	SALL1, DACH1, ZBTB46, SALL4, ZBTB16, TFEC, LCOR, RARB, CRYM, ACVR2B, GATA1, HBB-BH1	122	975	20094	2.02714	1	1	1
GOTERM_BP_DIRECT	GO:0007626~locomotory behavior	4	2.68456	0.0337535	ALDH1A3, CHD7, NPY1R, FIGN	122	117	20094	5.63094	1	1	1
GOTERM_BP_DIRECT	GO:0001974~blood vessel remodeling	3	2.01342	0.033881	FGF8, CHD7, ACVR2B	122	48	20094	10.2941	1	1	1
GOTERM_BP_DIRECT	GO:0001657~ureteric bud development	3	2.01342	0.033881	RET, SALL1, RARB	122	48	20094	10.2941	1	1	1
GOTERM_BP_DIRECT	GO:0007507~heart development	6	4.02685	0.0343572	FGF8, SALL1, SALL4, FOXL1, ACVR2B, STRA6	122	298	20094	3.31621	1	1	1
GOTERM_BP_DIRECT	GO:0032414~positive regulation of ion transmembrane transporter activity	2	1.34228	0.035595	TRPC6, HTR3B	122	6	20094	54.9016	1	1	1
GOTERM_BP_DIRECT	GO:0030947~regulation of vascular endothelial growth factor receptor signaling pathway	2	1.34228	0.035595	FZD4, VEGFD	122	6	20094	54.9016	1	1	1
GOTERM_BP_DIRECT	GO:0030540~female genitalia development	2	1.34228	0.035595	CHD7, STRA6	122	6	20094	54.9016	1	1	1
GOTERM_BP_DIRECT	GO:0001666~response to hypoxia	5	3.3557	0.036068	HSD11B2, PKLR, P2RX3, CHRNA7, VEGFD	122	206	20094	3.99769	1	1	1
GOTERM_BP_DIRECT	GO:0050890~cognition	3	2.01342	0.0365108	CHRNA7, CHD7, STRA6	122	50	20094	9.8823	1	1	1
GOTERM_BP_DIRECT	GO:0015696~ammonium transport	2	1.34228	0.0414041	RHAG, RHD	122	7	20094	47.0585	1	1	1
GOTERM_BP_DIRECT	GO:0043584~nose development	2	1.34228	0.0414041	ALDH1A3, CHD7	122	7	20094	47.0585	1	1	1
GOTERM_BP_DIRECT	GO:0030154~cell differentiation	12	8.05369	0.0442912	FGF17, HEMGN, FGF8, NEUROD4, SYT2, COL13A1, HSPA1L, PEG10, RARB, VEGFD, FOXL1, BMPR1B	122	1022	20094	1.93391	1	1	1
GOTERM_BP_DIRECT	GO:0060964~regulation of gene silencing by miRNA	2	1.34228	0.0471785	TRIM71, LIN28A	122	8	20094	41.1762	1	1	1
GOTERM_BP_DIRECT	GO:0010587~miRNA catabolic process	2	1.34228	0.0471785	LIN28B, LIN28A	122	8	20094	41.1762	1	1	1
GOTERM_BP_DIRECT	GO:0055085~transmembrane transport	7	4.69799	0.0488853	TRPC6, ABCA6, ABCA4, SLC4A1, SLC30A10, SLC26A5, SLC16A5	122	437	20094	2.63829	1	1	1
GOTERM_BP_DIRECT	GO:0030324~lung development	4	2.68456	0.0490646	FGF8, ACVR2B, PHEX, STRA6	122	136	20094	4.84426	1	1	1
GOTERM_BP_DIRECT	GO:0008543~fibroblast growth factor receptor signaling pathway	3	2.01342	0.049255	TRIM71, FGF17, FGF8	122	59	20094	8.37483	1	1	1
GOTERM_BP_DIRECT	GO:0015670~carbon dioxide transport	2	1.34228	0.0529184	CAR14, RHAG	122	9	20094	36.6011	1	1	1
GOTERM_BP_DIRECT	GO:0072488~ammonium transmembrane transport	2	1.34228	0.0529184	RHAG, RHD	122	9	20094	36.6011	1	1	1
GOTERM_BP_DIRECT	GO:0031047~gene silencing by RNA	3	2.01342	0.0538119	TRIM71, LIN28B, LIN28A	122	62	20094	7.96959	1	1	1
GOTERM_BP_DIRECT	GO:0042698~ovulation cycle	2	1.34228	0.0586239	CHRNA7, BMPR1B	122	10	20094	32.941	1	1	1
GOTERM_BP_DIRECT	GO:0000187~activation of MAPK activity	3	2.01342	0.0633485	RET, CHRNA7, ADRA2B	122	68	20094	7.26639	1	1	1
GOTERM_BP_DIRECT	GO:0050774~negative regulation of dendrite morphogenesis	2	1.34228	0.0642955	TRPC6, TLX2	122	11	20094	29.9463	1	1	1
GOTERM_BP_DIRECT	GO:0048048~embryonic eye morphogenesis	2	1.34228	0.0642955	ALDH1A3, RARB	122	11	20094	29.9463	1	1	1
GOTERM_BP_DIRECT	GO:0030432~peristalsis	2	1.34228	0.0642955	P2RX3, NPY1R	122	11	20094	29.9463	1	1	1
GOTERM_BP_DIRECT	GO:0010586~miRNA metabolic process	2	1.34228	0.0699331	TRIM71, LIN28A	122	12	20094	27.4508	1	1	1
GOTERM_BP_DIRECT	GO:0006811~ion transport	8	5.36913	0.0702506	STEAP3, TRPC6, KCNK9, P2RX3, CHRNA7, SLC4A1, HTR3B, SLC30A10	122	599	20094	2.19973	1	1	1
GOTERM_BP_DIRECT	GO:0042472~inner ear morphogenesis	3	2.01342	0.0734063	ALDH1A3, FGF8, CHD7	122	74	20094	6.67723	1	1	1
GOTERM_BP_DIRECT	GO:0034220~ion transmembrane transport	3	2.01342	0.0734063	CHRNA7, HTR3B, SLC26A5	122	74	20094	6.67723	1	1	1
GOTERM_BP_DIRECT	GO:0031123~RNA 3'-end processing	2	1.34228	0.075537	LIN28B, LIN28A	122	13	20094	25.3392	1	1	1
GOTERM_BP_DIRECT	GO:1902043~positive regulation of extrinsic apoptotic signaling pathway via death domain receptors	2	1.34228	0.075537	PMAIP1, BMPR1B	122	13	20094	25.3392	1	1	1
GOTERM_BP_DIRECT	GO:0060586~multicellular organismal iron ion homeostasis	2	1.34228	0.075537	RHAG, RHD	122	13	20094	25.3392	1	1	1
GOTERM_BP_DIRECT	GO:0072089~stem cell proliferation	3	2.01342	0.0768663	TRIM71, FGF8, RARB	122	76	20094	6.50151	1	1	1
GOTERM_BP_DIRECT	GO:0001568~blood vessel development	3	2.01342	0.0786154	FZD4, CHD7, STRA6	122	77	20094	6.41707	1	1	1
GOTERM_BP_DIRECT	GO:2000177~regulation of neural precursor cell proliferation	2	1.34228	0.0811074	TRIM71, SALL1	122	14	20094	23.5293	1	1	1
GOTERM_BP_DIRECT	GO:0035136~forelimb morphogenesis	2	1.34228	0.0811074	SALL1, ZBTB16	122	14	20094	23.5293	1	1	1
GOTERM_BP_DIRECT	GO:0031054~pre-miRNA processing	2	1.34228	0.0811074	LIN28B, LIN28A	122	14	20094	23.5293	1	1	1
GOTERM_BP_DIRECT	GO:0043065~positive regulation of apoptotic process	6	4.02685	0.0819678	ALDH1A3, STEAP3, ZBTB16, PMAIP1, RARB, DUSP9	122	383	20094	2.58023	1	1	1
GOTERM_BP_DIRECT	GO:0008406~gonad development	2	1.34228	0.0866446	FGF8, SALL1	122	15	20094	21.9607	1	1	1
GOTERM_BP_DIRECT	GO:0001822~kidney development	4	2.68456	0.0890962	FGF8, SALL1, ACVR2B, STRA6	122	175	20094	3.76468	1	1	1
GOTERM_BP_DIRECT	GO:0045165~cell fate commitment	3	2.01342	0.0893649	FGF8, NEUROD4, GATA1	122	83	20094	5.95319	1	1	1
GOTERM_BP_DIRECT	GO:0042574~retinal metabolic process	2	1.34228	0.0921486	ALDH1A3, ABCA4	122	16	20094	20.5881	1	1	1
GOTERM_BP_DIRECT	GO:0045793~positive regulation of cell size	2	1.34228	0.0921486	RET, SLC26A5	122	16	20094	20.5881	1	1	1
GOTERM_BP_DIRECT	GO:0035137~hindlimb morphogenesis	2	1.34228	0.0921486	SALL1, ZBTB16	122	16	20094	20.5881	1	1	1
GOTERM_BP_DIRECT	GO:0032611~interleukin-1 beta production	2	1.34228	0.0921486	CHRNA7, ACP5	122	16	20094	20.5881	1	1	1
GOTERM_BP_DIRECT	GO:0006828~manganese ion transport	2	1.34228	0.0921486	TRPC6, SLC30A10	122	16	20094	20.5881	1	1	1
GOTERM_BP_DIRECT	GO:0097028~dendritic cell differentiation	2	1.34228	0.0921486	ZBTB46, GATA1	122	16	20094	20.5881	1	1	1
GOTERM_BP_DIRECT	GO:0032924~activin receptor signaling pathway	2	1.34228	0.0976198	GDF6, ACVR2B	122	17	20094	19.377	1	1	1
GOTERM_BP_DIRECT	GO:0035909~aorta morphogenesis	2	1.34228	0.0976198	FGF8, CHD7	122	17	20094	19.377	1	1	1
GOTERM_BP_DIRECT	GO:0061036~positive regulation of cartilage development	2	1.34228	0.0976198	ZBTB16, BMPR1B	122	17	20094	19.377	1	1	1
GOTERM_BP_DIRECT	GO:0001886~endothelial cell morphogenesis	2	1.34228	0.0976198	COL24A1, COL22A1	122	17	20094	19.377	1	1	1
GOTERM_BP_DIRECT	GO:0006915~apoptotic process	8	5.36913	0.0990433	ALDH1A3, STEAP3, FGF8, PEG10, PMAIP1, RARB, TNS4, GDF6	122	652	20094	2.02092	1	1	1
GOTERM_BP_DIRECT	GO:0030198~extracellular matrix organization	4	2.68456	0.0998115	COL13A1, COL24A1, COL22A1, MATN3	122	184	20094	3.58054	1	1	1

## Sheet: GO-E12 5vsgroupE11 5_deg_up
Category	Term	Count	%	PValue	Genes	List Total	Pop Hits	Pop Total	Fold Enrichment	Bonferroni	Benjamini	FDR
GOTERM_BP_DIRECT	GO:0007155~cell adhesion	66	10.2964	2.60649e-21	RIPOR2, SPON1, COL16A1, CLSTN2, COL14A1, LAMC3, COL12A1, TNC, HAPLN3, ALCAM, CYP1B1, MADCAM1, PGM5, CD177, KIRREL3, POSTN, EGFL6, APLP1, FIBCD1, OMD, EMP2, DSG1B, DSG1A, BCAN, COL6A2, CDH10, COL6A1, COL8A2, CDH13, COL8A1, PKP1, DSG3, CD44, NLGN3, CALCA, NLGN1, LAMA3, MSLNL, THBS2, PCDHB20, FBLN5, ACAN, SRPX2, RELN, FLRT1, CDH22, NCAM1, SUSD5, CTNNA2, CADM3, LAMB3, CNTN6, CADM2, PCDH8, PCDHB13, PC…	557	602	20094	3.95511	8.65615e-18	8.65615e-18	8.49976e-18
GOTERM_BP_DIRECT	GO:0010628~positive regulation of gene expression	53	8.26833	1.02994e-13	TNC, SCX, PRDM1, NR2E3, CLU, SHH, FGF7, CYP26B1, HEY2, CTSH, LGALS7, OSR2, MEF2C, OSR1, TESC, NOG, IL18, NGF, WNT16, POU3F1, SOX10, NKX2-2OS, ACTA2, MAF, HAND2, ALDH1A2, PKP1, VSTM2A, CD44, PTGER4, PTGFR, CEBPA, CEBPB, PTGER3, NTS, LMNA, FGF20, CD74, NTRK2, GSN, JAG1, WNT3A, CAV1, WNT7A, NFATC2, KLF4, BMP6, P2RX7, BMP2, RGCC, TRPV4, FGF18, PMP22	557	583	20094	3.27958	3.42158e-10	1.71021e-10	1.67931e-10
GOTERM_BP_DIRECT	GO:0007156~homophilic cell adhesion via plasma membrane adhesion molecules	26	4.05616	1.18661e-11	PTPRT, ROBO2, CLSTN2, PCDHB20, CDH22, KIRREL3, CADM3, CNTN6, CADM2, PCDH8, VSTM2L, PCDHB13, DSG1B, PCDHB11, DSG1A, PCDHB10, PCDHB18, PCDHB17, CDH10, PCDHB6, CDH13, PCDHB5, DSG3, PCDHB9, CDH18, PCDHB7	557	172	20094	5.45326	3.94072e-08	1.31358e-08	1.28985e-08
GOTERM_BP_DIRECT	GO:0030198~extracellular matrix organization	26	4.05616	5.3291e-11	COL16A1, ELN, COL11A2, PAPLN, OLFML2A, RXFP1, FBLN5, ADAMTSL1, ADAMTS14, ADAMTSL3, ABI3BP, POSTN, EGFL6, WNT3A, APLP1, MMP9, COL1A1, SMOC2, COL5A2, COL8A2, COL8A1, PTX3, COL9A3, COL9A2, MATN4, MATN2	557	184	20094	5.09761	1.7698e-07	4.42448e-08	4.34455e-08
GOTERM_BP_DIRECT	GO:0007275~multicellular organism development	68	10.6084	8.34349e-10	FOXA1, ROBO2, RYR2, PLEKHB1, SCX, RORB, PRDM1, SHH, CREB3L1, HEY2, VSTM5, SEMA6B, MYOG, EPHA5, UNC45B, FOXD3, EMX2, MEF2C, EGFL6, FST, NOG, EN1, EBF3, WNT9A, UNC5D, WNT16, HIC1, ZAR1, PAX1, GREM2, HAND2, CDH10, TRNP1, CDH18, HMX1, CEBPA, DLX4, HOXD1, TWIST2, NTN5, APELA, RELN, FLRT1, CDH22, CTNNA2, CNMD, NGFR, WNT10B, NTRK2, JAG1, GADD45B, WNT3A, IRX4, FZD9, WNT7A, SEMA4F, TBX5, GRHL1, BMP6, TBX1…	557	1095	20094	2.2403	2.77087e-06	5.54174e-07	5.44162e-07
GOTERM_BP_DIRECT	GO:0051965~positive regulation of synapse assembly	16	2.4961	1.43319e-09	NLGN3, NTRK2, NLGN1, OXTR, CLSTN2, LRRN3, WNT7A, THBS2, SRPX2, ADGRB2, LRRTM3, SLITRK1, LRRTM4, ADGRB3, LRRTM1, FLRT1	557	74	20094	7.80009	4.75961e-06	7.9327e-07	7.78938e-07
GOTERM_BP_DIRECT	GO:0001649~osteoblast differentiation	18	2.80811	2.78861e-09	GDF10, WNT10B, MEF2C, WNT3A, NOG, COL11A2, TWIST2, BMP6, GLIS1, COL1A1, BMP3, BMP2, LOX, HAND2, CREB3L1, PENK, ENPP1, SP7	557	102	20094	6.36625	9.26094e-06	1.323e-06	1.2991e-06
GOTERM_BP_DIRECT	GO:0002062~chondrocyte differentiation	15	2.34009	3.33347e-09	OSR2, WNT10B, MEF2C, OSR1, COL11A2, SCX, WNT7A, LTBP3, WNT9A, RUNX3, PTHLH, BMP2, NFIB, FGF18, CYTL1	557	67	20094	8.07658	1.10704e-05	1.33116e-06	1.30711e-06
GOTERM_BP_DIRECT	GO:0001503~ossification	19	2.96412	3.60748e-09	GDF10, MYOG, IFITM1, CALCA, THRA, ALOX15, LRRC17, FZD9, RUNX3, MMP9, BMP6, COL1A1, BMP3, BMP2, COL5A2, MGP, FGF18, ENPP1, ATP6V1B1	557	117	20094	5.8584	1.19804e-05	1.33116e-06	1.30711e-06
GOTERM_BP_DIRECT	GO:0045944~positive regulation of transcription from RNA polymerase II promoter	71	11.0764	4.47021e-09	FOXA1, EHF, THRA, SCX, RORB, NR2E3, SOX21, SHH, SOX18, CREB3L1, HEY2, MYOG, LMO1, OSR2, FOXD3, MEF2C, ANXA2, OSR1, NOG, IL18, TRP73, EN1, EBF3, FOS, CYS1, POU3F1, SOX10, DCN, PAX1, NR5A2, MAF, HAND2, ELF5, CDH13, ERG, VGLL2, CEBPA, CEBPB, NFIX, HLF, CEBPD, GLIS3, GLIS1, FBLN5, ABLIM3, CYTL1, S100A10, WNT10B, JAG1, EGR3, DMRT2, WNT3A, WNT7A, NFATC2, FOXJ1, TBX5, GRHL1, KLF4, BMP6, FOSL2, BMP3, BMP…	557	1216	20094	2.10638	1.48455e-05	1.48456e-06	1.45774e-06
GOTERM_BP_DIRECT	GO:0030154~cell differentiation	61	9.51638	3.18848e-08	FOXA1, ROBO2, RIPOR2, EHF, CPNE5, THRA, FOXI3, SCX, NR2E3, RXFP1, SOX21, FGF7, SOX18, SEMA6B, MYOG, UNC45B, OSR2, FOXD3, MEF2C, EGFL6, OSR1, TESC, FST, NOG, SOX10, HCK, ZAP70, HAND2, ELF5, ERG, VSTM2A, SHANK1, CEBPB, DLX4, TWIST2, GLIS1, APELA, FGF20, CTNNA2, CNMD, NGFR, NTRK2, GADD45B, CAV1, RARRES2, IRX4, SEMA4F, KLF4, BMP6, TBX18, NELL1, BMP3, BMP2, MGP, FGF18, PMP22, CSPG5, SIM1, MDGA1, FGFR3…	557	1022	20094	2.15323	0.000105884	9.62632e-06	9.45241e-06
GOTERM_BP_DIRECT	GO:0048839~inner ear development	13	2.02808	5.17942e-07	H2-T23, CEBPA, JAG1, CEBPD, CYS1, CXCL14, POU3F4, SHH, BMP2, MAF, GJB6, CYTL1, FGFR3	557	71	20094	6.60536	0.00171861	0.000143341	0.000140751
GOTERM_BP_DIRECT	GO:0007411~axon guidance	20	3.12012	1.25116e-06	ROBO2, SEMA6B, EPHA5, RTN4R, NGFR, CNTN6, WNT3A, LAMA3, NOG, VSTM2L, SEMA4F, UNC5D, RUNX3, SHH, ALCAM, NR4A3, RELN, RTN4RL1, CNTN4, MATN2	557	188	20094	3.83781	0.0041465	0.000319624	0.00031385
GOTERM_BP_DIRECT	GO:0042060~wound healing	15	2.34009	1.88266e-06	POSTN, CDKN1A, GSN, CAV1, ALOX15, NOG, TPM1, TNC, ADRB1, DCN, AQP1, COL1A1, FGF7, LOX, KRT6A	557	109	20094	4.96451	0.00623283	0.000403518	0.000396228
GOTERM_BP_DIRECT	GO:0030199~collagen fibril organization	11	1.71607	1.94225e-06	COL1A1, ACAN, ADAMTS14, ANXA2, LOX, COL14A1, COL5A2, COL11A2, SCX, CYP1B1, FMOD	557	54	20094	7.34869	0.00642947	0.000403518	0.000396228
GOTERM_BP_DIRECT	GO:0045669~positive regulation of osteoblast differentiation	13	2.02808	1.94408e-06	GDF10, PTGER4, WNT10B, CEBPA, CEBPB, IFITM1, MEF2C, JAG1, CEBPD, BMP6, NELL1, BMP2, LMNA	557	80	20094	5.86225	0.00643551	0.000403518	0.000396228
GOTERM_BP_DIRECT	GO:0030534~adult behavior	10	1.56006	2.17129e-06	NLGN3, SLC10A4, SPTBN4, NR4A3, SLITRK1, SLC1A1, SLC1A2, GRIK1, ATP6V1B1, SHANK1	557	43	20094	8.38963	0.00718491	0.000424167	0.000416504
GOTERM_BP_DIRECT	GO:0030501~positive regulation of bone mineralization	10	1.56006	3.93999e-06	P2RX7, OSR2, NELL1, WNT10B, MEF2C, BMP2, OSR1, FZD9, FGFR3, BMP6	557	46	20094	7.84248	0.0129995	0.000726928	0.000713794
GOTERM_BP_DIRECT	GO:0032496~response to lipopolysaccharide	19	2.96412	4.75391e-06	PTGER4, PTGFR, CEBPB, PTGER2, PTGER3, FMO1, IRAK3, FOS, CXCL5, DCN, P2RX7, DUSP10, GJB6, PENK, ALPL, S100A14, TAC1, S100A9, S100A8	557	187	20094	3.66542	0.0156638	0.000830933	0.000815921
GOTERM_BP_DIRECT	GO:0007417~central nervous system development	15	2.34009	5.39202e-06	SEMA6B, NGFR, EMX2, GSN, GABRA4, NOG, APLP1, HAPLN3, BCAN, ACAN, SHH, SCIN, RELN, TLX1, PAM	557	119	20094	4.54732	0.0177476	0.000895344	0.000879168
GOTERM_BP_DIRECT	GO:0051216~cartilage development	13	2.02808	8.6648e-06	NOG, COL11A2, SCX, WNT7A, WNT9A, BMP6, BMP3, BMP2, MGP, ENPP1, CNMD, FGFR3, CD44	557	92	20094	5.09761	0.0283658	0.00137028	0.00134552
GOTERM_BP_DIRECT	GO:0001501~skeletal system development	14	2.18409	2.84199e-05	FST, NOG, COL11A2, NPR3, LTBP3, HAPLN3, MMP9, PTHLH, PAX1, COL1A1, BCAN, ACAN, GJA5, COL5A2	557	120	20094	4.2088	0.0900666	0.00429011	0.0042126
GOTERM_BP_DIRECT	GO:0007507~heart development	23	3.58814	3.14511e-05	MEF2C, OXTR, CDKN1A, OSR1, IRX4, MICAL2, FOXJ1, TBX5, MMP9, AGTR1A, ACAN, SHH, APELA, BMP2, PDLIM2, LOX, SOX18, HAND2, ALDH1A2, HEY2, ENPP1, RBM20, PAM	557	298	20094	2.78434	0.0991809	0.00454127	0.00445922
GOTERM_BP_DIRECT	GO:0006954~inflammatory response	27	4.21217	3.5776e-05	PTGER4, PTGFR, CALCA, PTGER2, PTGER3, CXCL5, CYP26B1, TAC1, CAMK1D, ANXA1, RARRES2, IL18, TRP73, BMP6, AGTR1A, P2RX7, HCK, BMP2, BCL6, F2RL1, AGTR2, ACKR1, IL17D, S100A9, CD44, CHST2, S100A8	557	390	20094	2.49753	0.112027	0.0049505	0.00486106
GOTERM_BP_DIRECT	GO:0000122~negative regulation of transcription from RNA polymerase II promoter	50	7.80031	4.24729e-05	FOXA1, THRA, BHLHE41, PRDM1, NR2E3, SHH, SOX18, TRIM29, HEY2, LMCD1, LMO1, OSR2, FOXD3, MEF2C, S100A1, OSR1, FST, NOG, EN1, POU3F1, SOX10, RUNX3, HIC1, MAF, IFI27, HMX1, CEBPA, CEBPB, NFIX, DLX4, GLIS3, TWIST2, GLIS1, FBLN5, JAZF1, WNT10B, CAV1, NFATC2, FOXJ1, KLF4, BMP6, TBX18, TBX15, BMP2, NR4A3, BCL6, NFIB, TRPV4, FGFR3, HOXD8	557	975	20094	1.85002	0.131559	0.00564209	0.00554016
GOTERM_BP_DIRECT	GO:0007189~adenylate cyclase-activating G-protein coupled receptor signaling pathway	14	2.18409	4.76512e-05	PTGER4, PTGFR, CALCA, PTGER2, PTGER3, ADRB1, ADCY2, ADCY8, RXFP1, PTHLH, ADCY5, ADGRB2, ADGRB3, ADGRG6	557	126	20094	4.00838	0.146367	0.00576884	0.00566462
GOTERM_BP_DIRECT	GO:0045778~positive regulation of ossification	7	1.09204	4.93992e-05	PTGER4, P2RX7, NELL1, WNT10B, BMP2, TAC1, CNMD	557	25	20094	10.1011	0.151308	0.00576884	0.00566462
GOTERM_BP_DIRECT	GO:0001958~endochondral ossification	8	1.24805	4.96952e-05	COL1A1, MEF2C, FGF18, SCX, ENPP1, ALPL, BMP6, PTHLH	557	36	20094	8.01676	0.152142	0.00576884	0.00566462
GOTERM_BP_DIRECT	GO:0071407~cellular response to organic cyclic compound	11	1.71607	5.03753e-05	P2RX7, WNT10B, CEBPA, CEBPB, BMP2, LGALS1, SOCS1, SLC1A1, IL18, CYP1B1, ALPL	557	77	20094	5.15363	0.154055	0.00576884	0.00566462
GOTERM_BP_DIRECT	GO:0030182~neuron differentiation	20	3.12012	5.56963e-05	FOXA1, NTRK2, WNT10B, CEBPB, EMX2, MEF2C, JAG1, HOXD1, WNT3A, IRX4, EN1, WNT7A, WNT9A, WNT16, RUNX3, BMP6, NRBP2, SHH, ALDH1A2, TLX1	557	245	20094	2.94493	0.168873	0.00616558	0.00605419
GOTERM_BP_DIRECT	GO:0035115~embryonic forelimb morphogenesis	8	1.24805	5.98407e-05	OSR2, SHH, ALDH1A2, OSR1, WNT7A, EN1, WNT9A, TBX5	557	37	20094	7.80009	0.180234	0.00641068	0.00629485
GOTERM_BP_DIRECT	GO:0008285~negative regulation of cell proliferation	28	4.36817	7.45593e-05	CEBPA, CDKN1A, IFITM1, TWIST2, NR2E3, SCIN, ABI3BP, LMNA, CYP1B1, MYOG, CDKN2C, TESC, CAV1, TRP73, WNT9A, TBX5, KLF4, BMP2, RGCC, BCL6, NFIB, GJB6, ALDH1A2, PMP22, CDH13, CD9, FGFR3, HSPA1A	557	431	20094	2.34365	0.219344	0.00773786	0.00759806
GOTERM_BP_DIRECT	GO:0045165~cell fate commitment	11	1.71607	9.63218e-05	WNT10B, SHH, MEF2C, BMP2, WNT3A, TLX1, HEY2, WNT7A, WNT9A, PRDM1, WNT16	557	83	20094	4.78108	0.273779	0.00951231	0.00934045
GOTERM_BP_DIRECT	GO:0006357~regulation of transcription from RNA polymerase II promoter	71	11.0764	9.73859e-05	FOXA1, EHF, THRA, FOXI3, BHLHE41, SCX, RORB, PRDM1, NR2E3, CREB3L1, HEY2, MYOG, OSR2, ZFP853, FOXD3, EMX2, MEF2C, OSR1, ANXA4, TRP73, EN1, EBF3, FOS, POU3F1, SOX10, RUNX3, HIC1, POU3F4, PAX1, NR5A2, MAF, HAND2, ELF5, ERG, VGLL2, HMX1, VGLL3, CEBPA, CEBPB, ASCL4, NFIX, HLF, CEBPD, DLX4, HOXD1, GLIS3, TWIST2, GLIS1, WNT10B, EGR3, DMRT2, IRX4, NFATC2, FOXJ1, TBX5, GRHL1, KLF4, TBX18, FOSL2, TBX15, M…	557	1606	20094	1.59487	0.27634	0.00951231	0.00934045
GOTERM_BP_DIRECT	GO:0071300~cellular response to retinoic acid	10	1.56006	0.000102721	COL1A1, MEF2C, CYP26B1, ALDH1A2, TESC, OSR1, TNC, RORB, KLF4, AQP1	557	68	20094	5.30521	0.289051	0.00974677	0.00957068
GOTERM_BP_DIRECT	GO:0009887~animal organ morphogenesis	15	2.34009	0.000122107	WNT10B, JAG1, THRA, LAMB3, WNT3A, LAMC3, LAMA3, WNT7A, NTN5, PAX1, GREM2, FGF7, BMP2, FGF18, FGF20	557	157	20094	3.44669	0.333384	0.0112643	0.0110608
GOTERM_BP_DIRECT	GO:0007204~positive regulation of cytosolic calcium ion concentration	16	2.4961	0.000133606	PTGER4, PTGFR, CALCA, OXTR, PTGER2, PTGER3, CIB2, AVPR1A, ADCY8, ADRA1B, AGTR1A, ADCY5, TRPV4, F2RL1, TAC1, CD55	557	178	20094	3.24273	0.358364	0.011992	0.0117754
GOTERM_BP_DIRECT	GO:0002009~morphogenesis of an epithelium	7	1.09204	0.000178366	KRT17, TNC, ENPP1, TBX5, FGFR3, SOX10, KRT6A	557	31	20094	8.14606	0.447005	0.0155882	0.0153066
GOTERM_BP_DIRECT	GO:0043065~positive regulation of apoptotic process	25	3.90016	0.000183934	FOXA1, HTRA4, ADRB1, CLU, LGALS1, SCIN, CYP1B1, PHLDA3, NGFR, WNT10B, CAMK1D, ANXA1, GADD45B, FZD9, IL18, TRP73, S100B, MMP9, P2RX7, NELL1, BMP2, BCL6, ALDH1A2, EEF1A2, FAS	557	383	20094	2.35479	0.457139	0.0156627	0.0153797
GOTERM_BP_DIRECT	GO:0045893~positive regulation of transcription, DNA-templated	38	5.92824	0.000196492	CEBPA, CEBPB, EHF, SCX, RORB, GLIS1, SHH, FGF7, SOX18, HAS3, MYOG, OSR2, CD74, MEF2C, WNT3A, TESC, TRP73, WNT7A, NFATC2, FOXJ1, EBF3, FOS, TBX5, KLF4, POU3F1, RUNX3, SOX10, FOSL2, COL1A1, BMP2, NR4A3, MAFB, NR5A2, NFIA, NFIB, HAND2, TRIM16, AGTR2	557	712	20094	1.92537	0.479318	0.0160045	0.0157153
GOTERM_BP_DIRECT	GO:0006355~regulation of transcription, DNA-templated	57	8.89236	0.000197586	FOXA1, EHF, THRA, BHLHE41, RORB, NR2E3, SOX21, SHH, EFEMP1, SOX18, CREB3L1, HEY2, MYOG, FOXD3, EMX2, MEF2C, TRP73, EN1, EBF3, FOS, POU3F1, SOX10, RUNX3, POU3F4, PAX1, NR5A2, MAF, HAND2, ELF5, ERG, VGLL2, HMX1, VGLL3, CEBPA, CEBPB, NFIX, HLF, CEBPD, DLX4, HOXD1, DMRT2, IRX4, NFATC2, FOXJ1, TBX5, GRHL1, TBX18, FOSL2, TBX15, BMP2, MAFB, NR4A3, NFIA, NFIB, SIM1, HOXD8, BRDT	557	1237	20094	1.66233	0.481206	0.0160045	0.0157153
GOTERM_BP_DIRECT	GO:0008543~fibroblast growth factor receptor signaling pathway	9	1.40406	0.000209299	NGFR, FGF7, FGFBP1, NOG, FGF18, FLRT1, FGF20, ENPP1, FGFR3	557	59	20094	5.50303	0.501002	0.0161647	0.0158726
GOTERM_BP_DIRECT	GO:0030282~bone mineralization	9	1.40406	0.000209299	BMP2, LOX, ALOX15, ENPP1, ALPL, LTBP3, FGFR3, ASPN, PTHLH	557	59	20094	5.50303	0.501002	0.0161647	0.0158726
GOTERM_BP_DIRECT	GO:0045666~positive regulation of neuron differentiation	12	1.87207	0.000277834	FOXA1, NGFR, SHH, MEF2C, BMP2, BCL6, FEZ1, MMD2, NGF, BMP6, RGS6, HSPA1A	557	112	20094	3.86522	0.602601	0.0209701	0.0205913
GOTERM_BP_DIRECT	GO:0050804~modulation of synaptic transmission	11	1.71607	0.000297776	NLGN3, NLGN1, RELN, WNT3A, PCDH8, GRIK3, CSPG5, GRIK1, NCAM1, NGF, ADCY8	557	95	20094	4.17715	0.628075	0.0215393	0.0211501
GOTERM_BP_DIRECT	GO:0008283~cell proliferation	23	3.58814	0.000298346	OSR2, WNT10B, CD74, CEBPA, ENPEP, CDKN2C, WNT3A, CAV1, NOG, TWIST2, IL18, NR2E3, PAX1, BTC, SHH, BCL6, NFIB, ALDH1A2, TLX1, FGF18, ENPP1, CD9, FGFR3	557	348	20094	2.38429	0.628778	0.0215393	0.0211501
GOTERM_BP_DIRECT	GO:0045444~fat cell differentiation	11	1.71607	0.000324328	GDF10, WNT10B, CEBPA, CEBPB, NR4A3, SOCS1, CEBPD, WNT3A, ENPP1, KLF4, GLIS1	557	96	20094	4.13364	0.659476	0.0227684	0.022357
GOTERM_BP_DIRECT	GO:0055074~calcium ion homeostasis	8	1.24805	0.000329082	CALB1, CAV1, CIB2, ENPP1, ALPL, FGFR3, PTHLH, ATP6V1B1	557	48	20094	6.01257	0.664811	0.0227684	0.022357
GOTERM_BP_DIRECT	GO:0007267~cell-cell signaling	10	1.56006	0.000395899	WNT10B, FGFBP1, SHH, WNT3A, GJA5, GJB6, WNT7A, ADRA1B, TBX5, FGFR3	557	81	20094	4.45375	0.731537	0.0268323	0.0263475
GOTERM_BP_DIRECT	GO:0016525~negative regulation of angiogenesis	11	1.71607	0.000451126	NGFR, RGCC, ADGRB2, ADGRB3, NGP, TNMD, THBS2, KLF4, CNMD, FBLN5, DCN	557	100	20094	3.96829	0.776541	0.0299638	0.0294224
GOTERM_BP_DIRECT	GO:0010259~multicellular organism aging	7	1.09204	0.000489342	PMP22, SLC1A2, ENPP1, ALPL, AVPR1A, ADRA1B, AGTR1A	557	37	20094	6.82508	0.803187	0.0318648	0.0312891
GOTERM_BP_DIRECT	GO:0008217~regulation of blood pressure	10	1.56006	0.000566806	ACTA2, ENPEP, NPY, NPR3, ATP1A2, AVPR1A, TAC1, ADRA1B, TRHDE, AGTR1A	557	85	20094	4.24417	0.847851	0.0361993	0.0355453
GOTERM_BP_DIRECT	GO:0098742~cell-cell adhesion via plasma-membrane adhesion molecules	7	1.09204	0.000655382	MPZ, CDH10, CDH22, CDH13, UNC5D, CDH18, CD177	557	39	20094	6.47507	0.886646	0.0410665	0.0403245
GOTERM_BP_DIRECT	GO:0042493~response to drug	21	3.27613	0.000744152	SLC10A4, EMX2, OXTR, CDKN1A, ANXA1, SLC1A1, TRP73, SLC1A2, NFATC2, GSTT1, FOS, MMP9, P2RX7, COL1A1, LGALS1, LOX, SST, APOD, NCAM1, PAM, S100A10	557	324	20094	2.33822	0.915605	0.0438861	0.0430932
GOTERM_BP_DIRECT	GO:0045109~intermediate filament organization	9	1.40406	0.000751803	SHH, BFSP2, KRT17, KRT15, KRT1, KRT14, KRT5, PRPH, KRT6A	557	71	20094	4.57294	0.917724	0.0438861	0.0430932
GOTERM_BP_DIRECT	GO:0045595~regulation of cell differentiation	7	1.09204	0.000753239	CEBPB, CEBPD, BCL6, WNT3A, PLEKHB1, KLF4, RUNX3	557	40	20094	6.3132	0.918116	0.0438861	0.0430932
GOTERM_BP_DIRECT	GO:0048678~response to axon injury	7	1.09204	0.000753239	SHH, LGALS1, SLC1A1, APOD, FGFR3, MATN4, MATN2	557	40	20094	6.3132	0.918116	0.0438861	0.0430932
GOTERM_BP_DIRECT	GO:0042311~vasodilation	8	1.24805	0.000856934	CALCA, GJA5, NPR3, F2RL1, AGTR2, VSTM4, CFTR, ADRA2A	557	56	20094	5.15363	0.941988	0.0484597	0.0475842
GOTERM_BP_DIRECT	GO:0010977~negative regulation of neuron projection development	10	1.56006	0.000860923	RTN4R, NGFR, LGALS1, EFEMP1, WNT3A, RTN4RL1, TRPV4, STMN2, PMP22, SPOCK1	557	90	20094	4.00838	0.942752	0.0484597	0.0475842
GOTERM_BP_DIRECT	GO:0042127~regulation of cell proliferation	16	2.4961	0.00090101	CEBPA, JAG1, ANXA1, PTGER2, TNC, ADAM33, WNT7A, PRDM1, KLF4, CLU, SHH, NR5A2, BCL6, TRNP1, FAS, S100A11	557	213	20094	2.70989	0.949893	0.0498709	0.0489699
GOTERM_BP_DIRECT	GO:0006366~transcription from RNA polymerase II promoter	17	2.65211	0.000963885	WNT10B, CEBPB, EHF, THRA, WNT3A, GLIS3, NFATC2, FOS, TBX5, KLF4, SOX10, FOSL2, POU3F4, BMP2, ABLIM3, BCL6, CYTL1	557	237	20094	2.58769	0.959344	0.0524764	0.0515283
GOTERM_BP_DIRECT	GO:0008284~positive regulation of cell proliferation	33	5.14821	0.00099035	PTGER4, PTGFR, TNC, SCX, CLU, PTHLH, SHH, FGF7, EFEMP1, NPY, FGF20, PROK2, CTSH, OSR2, WNT10B, NTRK2, FGFBP1, WNT3A, NOG, WNT7A, EMP2, AVPR1A, NGF, S100B, AGTR1A, BTC, HCK, TLX1, ALDH1A2, TRAF5, FGF18, AGTR2, FGFR3	557	640	20094	1.86014	0.962768	0.0530476	0.0520892
GOTERM_BP_DIRECT	GO:0035987~endodermal cell differentiation	6	0.936037	0.00109119	LAMB3, COL12A1, COL6A1, LAMA3, COL8A1, MMP9	557	29	20094	7.46388	0.973373	0.0566224	0.0555995
GOTERM_BP_DIRECT	GO:0001935~endothelial cell proliferation	6	0.936037	0.00109119	FGF7, CALCA, CAV1, PROK2, VSTM4, FGFR3	557	29	20094	7.46388	0.973373	0.0566224	0.0555995
GOTERM_BP_DIRECT	GO:0030336~negative regulation of cell migration	13	2.02808	0.00121868	PTPRT, NGFR, CD74, IFITM1, JAG1, NOG, TPM1, LDLRAD4, TBX5, KLF4, ACAN, SHH, CYP1B1	557	154	20094	3.04533	0.982573	0.0622653	0.0611404
GOTERM_BP_DIRECT	GO:0030900~forebrain development	10	1.56006	0.00126855	EMX2, SHH, RELN, NFIB, ALDH1A2, NOG, APLP1, TRP73, POU3F1, FGFR3	557	95	20094	3.79741	0.985235	0.063831	0.0626778
GOTERM_BP_DIRECT	GO:0032355~response to estradiol	11	1.71607	0.00163407	COL1A1, FOXA1, PTGFR, POSTN, OXTR, ANXA1, ALDH1A2, PENK, WNT7A, PAM, FOSL2	557	118	20094	3.36296	0.995622	0.0809963	0.079533
GOTERM_BP_DIRECT	GO:0030326~embryonic limb morphogenesis	8	1.24805	0.00173175	SHH, CYP26B1, ALDH1A2, GJA5, WNT7A, EN1, TBX5, SP9	557	63	20094	4.581	0.996837	0.0845755	0.0830475
GOTERM_BP_DIRECT	GO:0030855~epithelial cell differentiation	10	1.56006	0.00208691	WNT10B, EHF, NR5A2, BDH2, KRT17, ANXA4, KRT15, KRT14, WNT9A, PTHLH	557	102	20094	3.5368	0.99903	0.100444	0.0986291
GOTERM_BP_DIRECT	GO:0051480~regulation of cytosolic calcium ion concentration	7	1.09204	0.00222527	RYR2, CALCA, CALB1, CAV1, FXYD1, FZD9, ADCY8	557	49	20094	5.15363	0.999388	0.105573	0.103666
GOTERM_BP_DIRECT	GO:2000311~regulation of AMPA receptor activity	5	0.780031	0.00238591	NLGN3, NLGN1, MEF2C, GSG1L, SHANK1	557	21	20094	8.58938	0.999641	0.1116	0.109584
GOTERM_BP_DIRECT	GO:0001525~angiogenesis	18	2.80811	0.00248713	ENPEP, ANXA2, CAV1, IL18, WNT7A, SHH, APELA, SRPX2, SOX18, HAND2, GJA5, FGF18, COL8A2, PROK2, COL8A1, RSPO3, CYP1B1, SCG2	557	284	20094	2.28647	0.999744	0.114719	0.112646
GOTERM_BP_DIRECT	GO:0060348~bone development	9	1.40406	0.00261588	PTGER4, VKORC1, BMP2, EPYC, CHAD, OGN, ENPP1, FGFR3, PAPSS2	557	86	20094	3.77533	0.999833	0.117893	0.115763
GOTERM_BP_DIRECT	GO:0007399~nervous system development	24	3.74415	0.00262694	ROBO2, CHODL, SEMA6B, EPHA5, NTRK2, NGFR, NLGN1, MEF2C, CAMK1D, SLC1A2, NTN5, SEMA4F, GRIK1, FOS, GFRA2, NRBP2, SLITRK1, TRNP1, FGF18, CSPG5, CNTN4, SIM1, MDGA1, SHANK1	557	438	20094	1.97673	0.999839	0.117893	0.115763
GOTERM_BP_DIRECT	GO:0048706~embryonic skeletal system development	7	1.09204	0.00273586	COL1A1, SHH, DMRT2, HOXD1, HAND2, NOG, SCX	557	51	20094	4.95153	0.999888	0.121144	0.118955
GOTERM_BP_DIRECT	GO:0032060~bleb assembly	4	0.624025	0.00294515	P2RX7, PMP22, EMP2, EMP3	557	11	20094	13.1183	0.999944	0.12582	0.123546
GOTERM_BP_DIRECT	GO:0031069~hair follicle morphogenesis	6	0.936037	0.00295511	NGFR, FGF7, SHH, KRT17, FST, RUNX3	557	36	20094	6.01257	0.999946	0.12582	0.123546
GOTERM_BP_DIRECT	GO:1905606~regulation of presynapse assembly	6	0.936037	0.00295511	LRFN5, WNT3A, SLITRK1, LRRTM1, WNT7A, MDGA1	557	36	20094	6.01257	0.999946	0.12582	0.123546
GOTERM_BP_DIRECT	GO:0007422~peripheral nervous system development	5	0.780031	0.00337903	EGR3, ADGRB2, PMP22, NGF, SOX10	557	23	20094	7.84248	0.999987	0.142048	0.139481
GOTERM_BP_DIRECT	GO:0050673~epithelial cell proliferation	9	1.40406	0.00347294	FGF7, SHH, EHF, NOG, COL8A2, COL8A1, CYP7B1, FGFR3, TBX18	557	90	20094	3.60754	0.99999	0.144171	0.141566
GOTERM_BP_DIRECT	GO:0045907~positive regulation of vasoconstriction	7	1.09204	0.00365989	OXTR, CAV1, GJA5, PTGER3, AVPR1A, ADRA1B, MGLL	557	54	20094	4.67644	0.999995	0.148674	0.145988
GOTERM_BP_DIRECT	GO:0021766~hippocampus development	9	1.40406	0.00371781	KIRREL3, SEMA6B, EPHA5, BCAN, RELN, NR4A3, WNT3A, FEZ1, TRP73	557	91	20094	3.5679	0.999996	0.148674	0.145988
GOTERM_BP_DIRECT	GO:0051968~positive regulation of synaptic transmission, glutamatergic	6	0.936037	0.0037605	NLGN3, NTRK2, NGFR, NLGN1, OXTR, RELN	557	38	20094	5.69612	0.999996	0.148674	0.145988
GOTERM_BP_DIRECT	GO:2000463~positive regulation of excitatory postsynaptic potential	6	0.936037	0.0037605	NLGN3, NGFR, NLGN1, RELN, WNT7A, SHANK1	557	38	20094	5.69612	0.999996	0.148674	0.145988
GOTERM_BP_DIRECT	GO:0031668~cellular response to extracellular stimulus	5	0.780031	0.00396729	P2RX7, CDKN1A, SLC1A2, FOS, BMP6	557	24	20094	7.51571	0.999998	0.151766	0.149024
GOTERM_BP_DIRECT	GO:0032331~negative regulation of chondrocyte differentiation	5	0.780031	0.00396729	EFEMP1, CHADL, LTBP3, WNT9A, PTHLH	557	24	20094	7.51571	0.999998	0.151766	0.149024
GOTERM_BP_DIRECT	GO:0050679~positive regulation of epithelial cell proliferation	9	1.40406	0.00397581	OSR2, FGF7, SHH, NR4A3, OSR1, NOG, CYP7B1, BMP6, TBX18	557	92	20094	3.52912	0.999998	0.151766	0.149024
GOTERM_BP_DIRECT	GO:0060349~bone morphogenesis	6	0.936037	0.00421713	OSR2, CYP26B1, LTBP3, FGFR3, PAX1, PAPPA2	557	39	20094	5.55006	0.999999	0.157361	0.154518
GOTERM_BP_DIRECT	GO:0071773~cellular response to BMP stimulus	6	0.936037	0.00421713	BMP2, TNMD, NOG, SCX, VSTM2A, BMP6	557	39	20094	5.55006	0.999999	0.157361	0.154518
GOTERM_BP_DIRECT	GO:1990523~bone regeneration	3	0.468019	0.00441887	POSTN, FZD9, LGR6	557	4	20094	27.0566	1	0.163056	0.16011
GOTERM_BP_DIRECT	GO:0030324~lung development	11	1.71607	0.00459591	FOXA1, CEBPA, FGF7, SHH, LOX, NFIB, ALDH1A2, MGP, FGF18, TBX5, CFTR	557	136	20094	2.91786	1	0.166812	0.163798
GOTERM_BP_DIRECT	GO:0048708~astrocyte differentiation	5	0.780031	0.0046211	SHH, BMP2, NFIX, S100B, FGFR3	557	25	20094	7.21508	1	0.166812	0.163798
GOTERM_BP_DIRECT	GO:0009888~tissue development	6	0.936037	0.00471197	POSTN, NR5A2, LAMB3, LAMC3, LAMA3, NTN5	557	40	20094	5.41131	1	0.168263	0.165223
GOTERM_BP_DIRECT	GO:0048709~oligodendrocyte differentiation	7	1.09204	0.00479744	NLGN3, NTRK2, SHH, DUSP10, CDKN2C, SOX10, NKX2-2OS	557	57	20094	4.43031	1	0.169493	0.16643
GOTERM_BP_DIRECT	GO:0007613~memory	10	1.56006	0.00495343	CEBPB, OXTR, PPP1R1B, NOG, SLC1A1, ADRB1, NGF, CYP7B1, ADCY8, S100B	557	116	20094	3.10995	1	0.173162	0.170033
GOTERM_BP_DIRECT	GO:0015012~heparan sulfate proteoglycan biosynthetic process	5	0.780031	0.00534364	NDST3, HS3ST5, HS3ST6, HS3ST4, HS3ST1	557	26	20094	6.93758	1	0.184856	0.181517
GOTERM_BP_DIRECT	GO:0001568~blood vessel development	8	1.24805	0.00541012	COL1A1, MEF2C, LOX, SOX18, ALDH1A2, GJA5, HEY2, AGTR1A	557	77	20094	3.74809	1	0.185227	0.18188
GOTERM_BP_DIRECT	GO:0019233~sensory perception of pain	8	1.24805	0.00580545	P2RX7, NGFR, HOXD1, PENK, ADRB1, NGF, TAC1, AQP1	557	78	20094	3.70004	1	0.196734	0.193179
GOTERM_BP_DIRECT	GO:0070374~positive regulation of ERK1 and ERK2 cascade	15	2.34009	0.00600234	CD74, CAVIN3, ALOX15, NGF, ACTA2, APELA, BMP2, TRPV4, HAND2, NPY, FGF18, FGF20, F2RL1, FGFR3, CD44	557	235	20094	2.30269	1	0.200614	0.196989
GOTERM_BP_DIRECT	GO:0045060~negative thymic T cell selection	4	0.624025	0.00610789	CD74, ZAP70, SHH, FAS	557	14	20094	10.3073	1	0.200614	0.196989
GOTERM_BP_DIRECT	GO:0010460~positive regulation of heart rate	5	0.780031	0.00613795	RYR2, SLC1A1, HEY2, ADRB1, AVPR1A	557	27	20094	6.68063	1	0.200614	0.196989
GOTERM_BP_DIRECT	GO:0043588~skin development	7	1.09204	0.00617555	COL1A1, NGFR, SHH, COL5A2, PTCH2, ENPP1, SOX21	557	60	20094	4.2088	1	0.200614	0.196989
GOTERM_BP_DIRECT	GO:0001819~positive regulation of cytokine production	8	1.24805	0.00622199	PTGER4, P2RX7, RGCC, WNT3A, IRAK3, AGTR2, AGTR1A, ADRA2A	557	79	20094	3.65321	1	0.200614	0.196989
GOTERM_BP_DIRECT	GO:0043524~negative regulation of neuron apoptotic process	13	2.02808	0.00651847	NTRK2, NGFR, CEBPB, MEF2C, SLC1A1, FZD9, TRP73, EN1, VSTM2L, NGF, NRBP2, NR4A3, FGF20	557	189	20094	2.48138	1	0.208152	0.204392
GOTERM_BP_DIRECT	GO:0001938~positive regulation of endothelial cell proliferation	8	1.24805	0.0066604	FGF7, BMP2, EGR3, CAV1, CDH13, FGFR3, SCG2, BMP6	557	80	20094	3.60754	1	0.210659	0.206853
GOTERM_BP_DIRECT	GO:0001934~positive regulation of protein phosphorylation	16	2.4961	0.00693575	PTGER4, CD74, ANXA2, LRRN3, WNT3A, RARRES2, PTGER3, NGF, MMP9, P2RX7, FGF7, BMP2, RELN, FGF18, FGF20, FAS	557	264	20094	2.18639	1	0.217298	0.213372
GOTERM_BP_DIRECT	GO:0007568~aging	13	2.02808	0.00706832	CALCA, GSN, GSTT1, FOS, MMP9, AGTR1A, DCN, GJB6, KRT14, PENK, ENPP1, APOD, NCAM1	557	191	20094	2.45539	1	0.218982	0.215025
GOTERM_BP_DIRECT	GO:0045665~negative regulation of neuron differentiation	8	1.24805	0.00712135	SHH, JAG1, CAV1, TRP73, DTX1, CNTN4, SOX21, RAP1GAP	557	81	20094	3.563	1	0.218982	0.215025
GOTERM_BP_DIRECT	GO:0035810~positive regulation of urine volume	4	0.624025	0.00747967	PTGER4, BTC, NPR3, PTGER3	557	15	20094	9.62011	1	0.223784	0.219741
GOTERM_BP_DIRECT	GO:0042119~neutrophil activation	4	0.624025	0.00747967	ANXA1, IL18, F2RL1, CXCL5	557	15	20094	9.62011	1	0.223784	0.219741
GOTERM_BP_DIRECT	GO:0035815~positive regulation of renal sodium excretion	4	0.624025	0.00747967	PTGER4, AGTR2, AVPR1A, TAC1	557	15	20094	9.62011	1	0.223784	0.219741
GOTERM_BP_DIRECT	GO:0007616~long-term memory	6	0.936037	0.007817	NTRK2, CALB1, RELN, TAC1, ADCY8, SHANK1	557	45	20094	4.81005	1	0.231788	0.2276
GOTERM_BP_DIRECT	GO:0009612~response to mechanical stimulus	7	1.09204	0.00843389	P2RX7, COL1A1, POSTN, CAV1, TNC, ASIC3, DCN	557	64	20094	3.94575	1	0.247642	0.243168
GOTERM_BP_DIRECT	GO:0010811~positive regulation of cell-substrate adhesion	6	0.936037	0.00857538	SMOC2, EGFL6, NPY, ABI3BP, ALOX15, COL8A1	557	46	20094	4.70549	1	0.247642	0.243168
GOTERM_BP_DIRECT	GO:0048662~negative regulation of smooth muscle cell proliferation	6	0.936037	0.00857538	BMP2, CAV1, NPR3, OGN, APOD, KLF4	557	46	20094	4.70549	1	0.247642	0.243168
GOTERM_BP_DIRECT	GO:0007043~cell-cell junction assembly	5	0.780031	0.00898018	TRPV4, CDH10, CDH22, PKP1, CDH18	557	30	20094	6.01257	1	0.254899	0.250294
GOTERM_BP_DIRECT	GO:0014003~oligodendrocyte development	5	0.780031	0.00898018	SHH, GSN, CD9, FGFR3, SOX10	557	30	20094	6.01257	1	0.254899	0.250294
GOTERM_BP_DIRECT	GO:0030890~positive regulation of B cell proliferation	6	0.936037	0.00938317	CD74, MEF2C, CDKN1A, BCL6, WNT3A, NFATC2	557	47	20094	4.60537	1	0.262676	0.25793
GOTERM_BP_DIRECT	GO:0009410~response to xenobiotic stimulus	11	1.71607	0.00941237	P2RX7, SLC10A4, EMX2, SLC1A1, SLC1A2, NFATC2, NCAM1, FOS, MMP9, PAM, CFTR	557	151	20094	2.62801	1	0.262676	0.25793
GOTERM_BP_DIRECT	GO:0021537~telencephalon development	5	0.780031	0.0100896	BMP2, OXTR, SLC1A2, AVPR1A, NRGN	557	31	20094	5.81861	1	0.279229	0.274184
GOTERM_BP_DIRECT	GO:0001974~blood vessel remodeling	6	0.936037	0.0102418	MEF2C, JAG1, ELN, RSPO3, NOL3, ADRA1B	557	48	20094	4.50943	1	0.279721	0.274667
GOTERM_BP_DIRECT	GO:0060070~canonical Wnt signaling pathway	9	1.40406	0.0102758	WNT10B, SHH, WNT3A, FZD9, WNT7A, RSPO3, WNT9A, WNT16, KLF4	557	108	20094	3.00628	1	0.279721	0.274667
GOTERM_BP_DIRECT	GO:0002317~plasma cell differentiation	3	0.468019	0.0106471	LGALS1, BCL6, ENPP1	557	6	20094	18.0377	1	0.285064	0.279914
GOTERM_BP_DIRECT	GO:0046878~positive regulation of saliva secretion	3	0.468019	0.0106471	ADRB1, TAC1, AQP1	557	6	20094	18.0377	1	0.285064	0.279914
GOTERM_BP_DIRECT	GO:0032026~response to magnesium ion	4	0.624025	0.0107296	RYR2, KCNC2, ENPP1, BMP6	557	17	20094	8.48833	1	0.285064	0.279914
GOTERM_BP_DIRECT	GO:0031175~neuron projection development	12	1.87207	0.010873	NLGN1, NPY, STMN2, TNC, STMN3, NRTN, NCAM1, CNTN4, NGF, RUNX3, CD44, MATN2	557	178	20094	2.43205	1	0.286581	0.281404
GOTERM_BP_DIRECT	GO:0010467~gene expression	14	2.18409	0.011186	MEF2C, SLC1A1, PRDM1, KLF4, AGTR1A, NKX2-2OS, P2RX7, SHH, BMP2, MAFB, ENPP1, FAS, SP7, PTGDS	557	228	20094	2.21516	1	0.29251	0.287225
GOTERM_BP_DIRECT	GO:0046597~negative regulation of viral entry into host cell	5	0.780031	0.011284	CD74, IFITM1, GSN, PTX3, TRIM12A	557	32	20094	5.63678	1	0.292767	0.287478
GOTERM_BP_DIRECT	GO:0007218~neuropeptide signaling pathway	8	1.24805	0.0117012	PCSK1N, CALCA, NPY, PENK, PROK2, TAC1, NTS, RXFP3	557	89	20094	3.24273	1	0.298919	0.293519
GOTERM_BP_DIRECT	GO:0060041~retina development in camera-type eye	8	1.24805	0.0117012	RD3, NTRK2, CALB1, LAMC3, SLC1A1, TULP1, RORB, NR2E3	557	89	20094	3.24273	1	0.298919	0.293519
GOTERM_BP_DIRECT	GO:0007519~skeletal muscle tissue development	7	1.09204	0.0120213	MYOG, SHH, MEF2C, CAV1, ELN, VGLL2, DCN	557	69	20094	3.65982	1	0.301398	0.295952
GOTERM_BP_DIRECT	GO:0060173~limb development	6	0.936037	0.0121175	SHH, NOG, WNT7A, EN1, RSPO3, PAM	557	50	20094	4.32905	1	0.301398	0.295952
GOTERM_BP_DIRECT	GO:0006813~potassium ion transport	10	1.56006	0.0123024	KCNH3, KCNE4, FXYD3, KCNS2, KCNC2, GJA5, KCNJ13, FXYD1, ATP1A2, AQP1	557	134	20094	2.69219	1	0.301398	0.295952
GOTERM_BP_DIRECT	GO:0098609~cell-cell adhesion	13	2.02808	0.0123531	KIRREL3, LAMA3, DSG1B, DSG1A, RAP1GAP, LGALS1, SRPX2, CDH10, CDH22, CDH13, PKP1, CTNNA2, DSG3	557	206	20094	2.2766	1	0.301398	0.295952
GOTERM_BP_DIRECT	GO:0032967~positive regulation of collagen biosynthetic process	5	0.780031	0.0125658	RGCC, CREB3L1, IL18, SCX, LARP6	557	33	20094	5.46597	1	0.301398	0.295952
GOTERM_BP_DIRECT	GO:0016339~calcium-dependent cell-cell adhesion via plasma membrane cell adhesion molecules	5	0.780031	0.0125658	NLGN1, CDH10, CDH22, CDH13, CDH18	557	33	20094	5.46597	1	0.301398	0.295952
GOTERM_BP_DIRECT	GO:0042445~hormone metabolic process	4	0.624025	0.012615	FOXA1, SELENOM, ENPP1, PAPSS2	557	18	20094	8.01676	1	0.301398	0.295952
GOTERM_BP_DIRECT	GO:2000310~regulation of NMDA receptor activity	4	0.624025	0.012615	NLGN3, NLGN1, MEF2C, RELN	557	18	20094	8.01676	1	0.301398	0.295952
GOTERM_BP_DIRECT	GO:0032793~positive regulation of CREB transcription factor activity	4	0.624025	0.012615	EPHA5, RELN, CAMK1D, ADCY8	557	18	20094	8.01676	1	0.301398	0.295952
GOTERM_BP_DIRECT	GO:0050808~synapse organization	7	1.09204	0.0128501	NLGN3, NLGN1, LRRTM4, LRRTM1, SLC1A1, WNT7A, PPFIA2	557	70	20094	3.60754	1	0.302661	0.297193
GOTERM_BP_DIRECT	GO:0071560~cellular response to transforming growth factor beta stimulus	7	1.09204	0.0128501	COL1A1, POSTN, MEF2C, CAV1, PENK, SCX, WNT7A	557	70	20094	3.60754	1	0.302661	0.297193
GOTERM_BP_DIRECT	GO:0043278~response to morphine	5	0.780031	0.0139369	PPP1R1B, PENK, SLC1A1, TAC1, ADRA1B	557	34	20094	5.30521	1	0.320686	0.314892
GOTERM_BP_DIRECT	GO:0001755~neural crest cell migration	6	0.936037	0.0142133	SEMA6B, SHH, ANXA6, SEMA4F, NRTN, SOX10	557	52	20094	4.16255	1	0.320686	0.314892
GOTERM_BP_DIRECT	GO:0071529~cementum mineralization	3	0.468019	0.0146344	ENPP1, ALPL, SP7	557	7	20094	15.4609	1	0.320686	0.314892
GOTERM_BP_DIRECT	GO:0071229~cellular response to acid chemical	3	0.468019	0.0146344	ANXA2, NGF, S100A10	557	7	20094	15.4609	1	0.320686	0.314892
GOTERM_BP_DIRECT	GO:0001765~membrane raft assembly	3	0.468019	0.0146344	ANXA2, EMP2, S100A10	557	7	20094	15.4609	1	0.320686	0.314892
GOTERM_BP_DIRECT	GO:0051693~actin filament capping	4	0.624025	0.0146776	SPTBN4, SCIN, GSN, TPM1	557	19	20094	7.59482	1	0.320686	0.314892
GOTERM_BP_DIRECT	GO:0048546~digestive tract morphogenesis	4	0.624025	0.0146776	SHH, TRP73, FGFR3, SOX10	557	19	20094	7.59482	1	0.320686	0.314892
GOTERM_BP_DIRECT	GO:0060074~synapse maturation	4	0.624025	0.0146776	BCAN, NLGN1, NFIA, SHANK1	557	19	20094	7.59482	1	0.320686	0.314892
GOTERM_BP_DIRECT	GO:0035418~protein localization to synapse	4	0.624025	0.0146776	NLGN1, RELN, LRRTM1, SHANK1	557	19	20094	7.59482	1	0.320686	0.314892
GOTERM_BP_DIRECT	GO:0019229~regulation of vasoconstriction	4	0.624025	0.0146776	ATP1A2, ADRA1B, AGTR1A, ADRA2A	557	19	20094	7.59482	1	0.320686	0.314892
GOTERM_BP_DIRECT	GO:0071285~cellular response to lithium ion	4	0.624025	0.0146776	MYOG, CEBPA, SHH, FAS	557	19	20094	7.59482	1	0.320686	0.314892
GOTERM_BP_DIRECT	GO:0061436~establishment of skin barrier	5	0.780031	0.0153994	CYP26B1, KRT1, IL18, GRHL1, KLF4	557	35	20094	5.15363	1	0.334257	0.328218
GOTERM_BP_DIRECT	GO:0030216~keratinocyte differentiation	7	1.09204	0.0155756	MAFB, ANXA1, KRT14, MADCAM1, WNT16, POU3F1, SPRR1A	557	73	20094	3.45929	1	0.335886	0.329818
GOTERM_BP_DIRECT	GO:0007626~locomotory behavior	9	1.40406	0.0160878	CALB1, RELN, LRRTM1, PPP1R1B, PENK, SLC1A1, ADCY8, ADRA1B, ADCY5	557	117	20094	2.77503	1	0.341959	0.335781
GOTERM_BP_DIRECT	GO:0048705~skeletal system morphogenesis	6	0.936037	0.0165396	P2RX7, COL1A1, COL11A2, WNT7A, HOXD8, RFLNA	557	54	20094	4.00838	1	0.341959	0.335781
GOTERM_BP_DIRECT	GO:0045600~positive regulation of fat cell differentiation	6	0.936037	0.0165396	CEBPA, CEBPB, BMP2, SULT1E1, RARRES2, CCDC3	557	54	20094	4.00838	1	0.341959	0.335781
GOTERM_BP_DIRECT	GO:0034220~ion transmembrane transport	7	1.09204	0.0165666	RYR2, GABRB1, KCNC2, GABRA4, ANXA6, TRPM5, ASIC3	557	74	20094	3.41254	1	0.341959	0.335781
GOTERM_BP_DIRECT	GO:0008542~visual learning	7	1.09204	0.0165666	NLGN3, B3GAT1, PPP1R1B, NOG, ATP1A2, ADRA1B, NTS	557	74	20094	3.41254	1	0.341959	0.335781
GOTERM_BP_DIRECT	GO:0007169~transmembrane receptor protein tyrosine kinase signaling pathway	9	1.40406	0.0168552	PTPRT, EPHA5, NTRK2, HCK, ZAP70, NRTN, NGF, FGFR3, GFRA2	557	118	20094	2.75151	1	0.341959	0.335781
GOTERM_BP_DIRECT	GO:0001913~T cell mediated cytotoxicity	4	0.624025	0.0169193	P2RX7, H2-T23, CTSH, EMP2	557	20	20094	7.21508	1	0.341959	0.335781
GOTERM_BP_DIRECT	GO:0032230~positive regulation of synaptic transmission, GABAergic	4	0.624025	0.0169193	NLGN1, OXTR, GRIK1, TAC1	557	20	20094	7.21508	1	0.341959	0.335781
GOTERM_BP_DIRECT	GO:0017144~drug metabolic process	4	0.624025	0.0169193	VKORC1, AOX2, AOX3, FMO1	557	20	20094	7.21508	1	0.341959	0.335781
GOTERM_BP_DIRECT	GO:0042476~odontogenesis	5	0.780031	0.0169549	OSR2, SHH, OSR1, ENPP1, PAM	557	36	20094	5.01047	1	0.341959	0.335781
GOTERM_BP_DIRECT	GO:0043410~positive regulation of MAPK cascade	12	1.87207	0.0169899	P2RX7, NTRK2, NGFR, CD74, BMP2, C1QTNF2, GADD45B, TRP73, ADRA1B, FGFR3, ADRA2A, TRIM12A	557	190	20094	2.27845	1	0.341959	0.335781
GOTERM_BP_DIRECT	GO:0007623~circadian rhythm	8	1.24805	0.0181041	NTRK2, NGFR, BHLHE41, PRKG2, PROK2, FAS, NGF, CYP7B1	557	97	20094	2.97529	1	0.362192	0.355648
GOTERM_BP_DIRECT	GO:0032570~response to progesterone	5	0.780031	0.0186051	GABRB1, OXTR, PTGER2, CAV1, FOS	557	37	20094	4.87505	1	0.369207	0.362536
GOTERM_BP_DIRECT	GO:0001570~vasculogenesis	7	1.09204	0.0186771	NTRK2, SHH, APELA, SOX18, CAV1, HEY2, ENPP1	557	76	20094	3.32273	1	0.369207	0.362536
GOTERM_BP_DIRECT	GO:0051402~neuron apoptotic process	8	1.24805	0.0190486	NGFR, NR4A3, FAS, ENPP1, AGTR2, NGF, FGFR3, AGTR1A	557	98	20094	2.94493	1	0.37345	0.366703
GOTERM_BP_DIRECT	GO:2000543~positive regulation of gastrulation	3	0.468019	0.0191581	OSR2, OSR1, SCX	557	8	20094	13.5283	1	0.37345	0.366703
GOTERM_BP_DIRECT	GO:0042462~eye photoreceptor cell development	4	0.624025	0.0193416	TULP1, RORB, PRDM1, NR2E3	557	21	20094	6.87151	1	0.37345	0.366703
GOTERM_BP_DIRECT	GO:0022010~central nervous system myelination	4	0.624025	0.0193416	MAL, ENPP1, FGFR3, SOX10	557	21	20094	6.87151	1	0.37345	0.366703
GOTERM_BP_DIRECT	GO:0048146~positive regulation of fibroblast proliferation	7	1.09204	0.0197983	BTC, NGFR, CD74, CDKN1A, ANXA2, AQP1, FOSL2	557	77	20094	3.27958	1	0.380058	0.373192
GOTERM_BP_DIRECT	GO:0050729~positive regulation of inflammatory response	8	1.24805	0.0200271	PTGER4, CEBPA, CEBPB, LGALS1, TRPV4, IL18, S100A9, S100A8	557	99	20094	2.91518	1	0.382242	0.375336
GOTERM_BP_DIRECT	GO:0042552~myelination	7	1.09204	0.0209643	GAL3ST1, MPZ, ADGRG6, PMP22, MAL, MAL2, POU3F1	557	78	20094	3.23754	1	0.397843	0.390656
GOTERM_BP_DIRECT	GO:0035914~skeletal muscle cell differentiation	6	0.936037	0.0219206	MYOG, MEF2C, HLF, WNT3A, SCX, FOS	557	58	20094	3.73194	1	0.402649	0.395374
GOTERM_BP_DIRECT	GO:0001502~cartilage condensation	4	0.624025	0.021945	ACAN, THRA, WNT7A, OTOR	557	22	20094	6.55916	1	0.402649	0.395374
GOTERM_BP_DIRECT	GO:0010001~glial cell differentiation	4	0.624025	0.021945	RELN, NFIB, DTX1, POU3F1	557	22	20094	6.55916	1	0.402649	0.395374
GOTERM_BP_DIRECT	GO:0010463~mesenchymal cell proliferation	4	0.624025	0.021945	FGF7, SHH, HAND2, TBX18	557	22	20094	6.55916	1	0.402649	0.395374
GOTERM_BP_DIRECT	GO:0014902~myotube differentiation	4	0.624025	0.021945	MYOG, SHH, MEF2C, AVPR1A	557	22	20094	6.55916	1	0.402649	0.395374
GOTERM_BP_DIRECT	GO:0048646~anatomical structure formation involved in morphogenesis	4	0.624025	0.021945	FOXA1, SHH, NOG, TBX18	557	22	20094	6.55916	1	0.402649	0.395374
GOTERM_BP_DIRECT	GO:0007389~pattern specification process	6	0.936037	0.0234237	SHH, FST, NOG, HEY2, TBX5, PAX1	557	59	20094	3.66869	1	0.424971	0.417293
GOTERM_BP_DIRECT	GO:0007266~Rho protein signal transduction	6	0.936037	0.0234237	NGFR, BCL6, CDC42EP3, CDH13, ADRB1, AGTR1A	557	59	20094	3.66869	1	0.424971	0.417293
GOTERM_BP_DIRECT	GO:0001822~kidney development	11	1.71607	0.0240795	SHH, CYP26B1, ANXA4, ALDH1A2, TRP73, ENPP1, PRDM1, CYS1, BMP6, AGTR1A, DCN	557	175	20094	2.2676	1	0.424971	0.417293
GOTERM_BP_DIRECT	GO:0043269~regulation of ion transport	3	0.468019	0.0241853	FXYD3, FXYD1, FXYD7	557	9	20094	12.0251	1	0.424971	0.417293
GOTERM_BP_DIRECT	GO:0031394~positive regulation of prostaglandin biosynthetic process	3	0.468019	0.0241853	CD74, ANXA1, AVPR1A	557	9	20094	12.0251	1	0.424971	0.417293
GOTERM_BP_DIRECT	GO:0031340~positive regulation of vesicle fusion	3	0.468019	0.0241853	ANXA1, ANXA2, DOC2B	557	9	20094	12.0251	1	0.424971	0.417293
GOTERM_BP_DIRECT	GO:0071314~cellular response to cocaine	3	0.468019	0.0241853	PPP1R1B, SLC1A1, SLC1A2	557	9	20094	12.0251	1	0.424971	0.417293
GOTERM_BP_DIRECT	GO:2000391~positive regulation of neutrophil extravasation	3	0.468019	0.0241853	PTGER4, RIPOR2, PTGER3	557	9	20094	12.0251	1	0.424971	0.417293
GOTERM_BP_DIRECT	GO:0048545~response to steroid hormone	4	0.624025	0.0247299	OXTR, LOX, SST, ADRA1B	557	23	20094	6.27398	1	0.42999	0.422222
GOTERM_BP_DIRECT	GO:0022011~myelination in peripheral nervous system	4	0.624025	0.0247299	NTRK2, ADGRG6, PMP22, POU3F1	557	23	20094	6.27398	1	0.42999	0.422222
GOTERM_BP_DIRECT	GO:0007219~Notch signaling pathway	9	1.40406	0.0249847	FOXA1, CEBPA, BMP2, JAG1, CNTN6, ANXA4, HEY2, DTX1, SUSD5	557	127	20094	2.55652	1	0.432157	0.424349
GOTERM_BP_DIRECT	GO:0050873~brown fat cell differentiation	5	0.780031	0.0261804	CEBPA, CEBPB, LAMB3, RARRES2, ADRB1	557	41	20094	4.39944	1	0.450493	0.442354
GOTERM_BP_DIRECT	GO:0007165~signal transduction	51	7.95632	0.0265618	GPR27, GABRB1, OXTR, CHRM1, ADRA1B, OLFML2A, RXFP1, RXFP3, SHH, GRB14, TCP11L2, ANXA1, IRAK3, UNC5D, AVPR1A, OLFM5, ADRA2A, AGTR1A, GEM, APBB1IP, ADGRB2, ADGRB3, TRAF5, SPARCL1, RHOV, AGTR2, PTGER4, PTGFR, ENPEP, NPY4R, PDE1A, PTGER2, PTGER3, NPR3, ADRB1, TRHDE, GNG4, ADGRG6, NGFR, WNT10B, PPP1R14C, WNT3A, GABRA4, FZD9, WNT7A, FGF18, PPP1R1B, FAS, F2RL1, ACKR1, LGR6	557	1368	20094	1.34492	1	0.453452	0.44526
GOTERM_BP_DIRECT	GO:0032757~positive regulation of interleukin-8 production	6	0.936037	0.0266255	PTGER4, CD74, CALCA, IL18, F2RL1, IL17D	557	61	20094	3.5484	1	0.453452	0.44526
GOTERM_BP_DIRECT	GO:0051091~positive regulation of sequence-specific DNA binding transcription factor activity	9	1.40406	0.0271085	FOXA1, WNT10B, BMP2, RGCC, WNT3A, TRAF5, CYTL1, NGF, TRIM12A	557	129	20094	2.51689	1	0.459323	0.451025
GOTERM_BP_DIRECT	GO:1903672~positive regulation of sprouting angiogenesis	4	0.624025	0.027696	SHH, S100A1, SEC1, KLF4	557	24	20094	6.01257	1	0.459893	0.451584
GOTERM_BP_DIRECT	GO:0045445~myoblast differentiation	4	0.624025	0.027696	SHH, LGALS1, WNT3A, NOL3	557	24	20094	6.01257	1	0.459893	0.451584
GOTERM_BP_DIRECT	GO:0030902~hindbrain development	4	0.624025	0.027696	SHH, NFIB, ALDH1A2, EN1	557	24	20094	6.01257	1	0.459893	0.451584
GOTERM_BP_DIRECT	GO:0042246~tissue regeneration	4	0.624025	0.027696	CDKN1A, GSN, APOD, LGR6	557	24	20094	6.01257	1	0.459893	0.451584
GOTERM_BP_DIRECT	GO:0001656~metanephros development	5	0.780031	0.0283233	ROBO2, OSR2, SHH, OSR1, CTSH	557	42	20094	4.29469	1	0.467969	0.459514
GOTERM_BP_DIRECT	GO:0071260~cellular response to mechanical stimulus	8	1.24805	0.0291416	PTGER4, COL1A1, RIPOR2, CAV1, SCX, ATP1A2, BMP6, AQP1	557	107	20094	2.69723	1	0.476251	0.467647
GOTERM_BP_DIRECT	GO:1903589~positive regulation of blood vessel endothelial cell proliferation involved in sprouting angiogenesis	3	0.468019	0.029685	FGFBP1, APELA, AGTR1A	557	10	20094	10.8226	1	0.476251	0.467647
GOTERM_BP_DIRECT	GO:0021517~ventral spinal cord development	3	0.468019	0.029685	RELN, VLDLR, VSTM5	557	10	20094	10.8226	1	0.476251	0.467647
GOTERM_BP_DIRECT	GO:0009404~toxin metabolic process	3	0.468019	0.029685	FMO1, CYP1B1, PAM	557	10	20094	10.8226	1	0.476251	0.467647
GOTERM_BP_DIRECT	GO:0048643~positive regulation of skeletal muscle tissue development	3	0.468019	0.029685	SHH, MEF2C, WNT3A	557	10	20094	10.8226	1	0.476251	0.467647
GOTERM_BP_DIRECT	GO:0060346~bone trabecula formation	3	0.468019	0.029685	COL1A1, WNT10B, ENPP1	557	10	20094	10.8226	1	0.476251	0.467647
GOTERM_BP_DIRECT	GO:0048856~anatomical structure development	6	0.936037	0.0300935	SHH, SPARCL1, WNT9A, EGFL8, NR2E3, PAX1	557	63	20094	3.43575	1	0.480483	0.471802
GOTERM_BP_DIRECT	GO:0046928~regulation of neurotransmitter secretion	4	0.624025	0.0308426	NTRK2, MEF2C, CAMK2A, NGF	557	25	20094	5.77206	1	0.490088	0.481233
GOTERM_BP_DIRECT	GO:0016055~Wnt signaling pathway	13	2.02808	0.0324611	WNT10B, WNT3A, FZD9, WNT7A, WNT9A, WNT16, HIC1, BMP2, RSPO3, ENPP1, LGR6, CD44, KRT6A	557	237	20094	1.97882	1	0.513349	0.504074
GOTERM_BP_DIRECT	GO:0014911~positive regulation of smooth muscle cell migration	5	0.780031	0.0329136	PTGER4, POSTN, IL18, CYP1B1, S100A11	557	44	20094	4.09948	1	0.518038	0.508679
GOTERM_BP_DIRECT	GO:0090263~positive regulation of canonical Wnt signaling pathway	8	1.24805	0.0331812	COL1A1, WNT10B, THRA, WNT3A, CAV1, FZD9, RSPO3, FGFR3	557	110	20094	2.62367	1	0.519787	0.510396
GOTERM_BP_DIRECT	GO:0042474~middle ear morphogenesis	4	0.624025	0.0341686	OSR2, OSR1, NOG, ENPP1	557	26	20094	5.55006	1	0.530251	0.520672
GOTERM_BP_DIRECT	GO:0032930~positive regulation of superoxide anion generation	4	0.624025	0.0341686	IL18, F2RL1, AGTR1A, CD177	557	26	20094	5.55006	1	0.530251	0.520672
GOTERM_BP_DIRECT	GO:0048469~cell maturation	5	0.780031	0.0353621	CEBPA, BFSP2, SOX18, SOX10, RUNX3	557	45	20094	4.00838	1	0.540265	0.530504
GOTERM_BP_DIRECT	GO:0006171~cAMP biosynthetic process	3	0.468019	0.0356272	ADCY2, ADCY8, ADCY5	557	11	20094	9.83875	1	0.540265	0.530504
GOTERM_BP_DIRECT	GO:0045217~cell-cell junction maintenance	3	0.468019	0.0356272	MPZ, F2RL1, CD177	557	11	20094	9.83875	1	0.540265	0.530504
GOTERM_BP_DIRECT	GO:0099558~maintenance of synapse structure	3	0.468019	0.0356272	NLGN1, ADGRB3, CBLN4	557	11	20094	9.83875	1	0.540265	0.530504
GOTERM_BP_DIRECT	GO:0030193~regulation of blood coagulation	3	0.468019	0.0356272	VKORC1, CAV1, F2RL1	557	11	20094	9.83875	1	0.540265	0.530504
GOTERM_BP_DIRECT	GO:0051412~response to corticosterone	4	0.624025	0.0376724	CDKN1A, FOS, AVPR1A, AGTR1A	557	27	20094	5.3445	1	0.566109	0.555881
GOTERM_BP_DIRECT	GO:2001222~regulation of neuron migration	4	0.624025	0.0376724	RELN, CAMK2A, CTNNA2, UNC5D	557	27	20094	5.3445	1	0.566109	0.555881
GOTERM_BP_DIRECT	GO:0042733~embryonic digit morphogenesis	6	0.936037	0.0378488	OSR2, SHH, HAND2, OSR1, NOG, WNT7A	557	67	20094	3.23063	1	0.566198	0.555969
GOTERM_BP_DIRECT	GO:0071277~cellular response to calcium ion	7	1.09204	0.0386952	NLGN1, MEF2C, CPNE5, CPNE4, ALOX15, FOS, ADCY8	557	90	20094	2.80586	1	0.573691	0.563326
GOTERM_BP_DIRECT	GO:0009636~response to toxic substance	7	1.09204	0.0386952	GABRB1, CDKN1A, SLC6A14, PENK, CYP1B1, FAS, FOS	557	90	20094	2.80586	1	0.573691	0.563326
GOTERM_BP_DIRECT	GO:0042475~odontogenesis of dentin-containing tooth	6	0.936037	0.0399614	NGFR, SHH, BMP2, HAND2, FST, TNC	557	68	20094	3.18312	1	0.58561	0.57503
GOTERM_BP_DIRECT	GO:0097190~apoptotic signaling pathway	6	0.936037	0.0399614	P2RX7, SHH, IFI27, CAV1, ANXA6, FAS	557	68	20094	3.18312	1	0.58561	0.57503
GOTERM_BP_DIRECT	GO:0007420~brain development	14	2.18409	0.0412359	ROBO2, EMX2, CADM2, NOG, SLC1A1, FOXJ1, POU3F1, POU3F4, RELN, NFIB, CDH22, CD9, APOD, CNTN4	557	273	20094	1.85002	1	0.58561	0.57503
GOTERM_BP_DIRECT	GO:0008016~regulation of heart contraction	4	0.624025	0.0413523	CALCA, THRA, S100A1, CACNA2D2	557	28	20094	5.15363	1	0.58561	0.57503
GOTERM_BP_DIRECT	GO:0099560~synaptic membrane adhesion	4	0.624025	0.0413523	NLGN1, LRFN5, SLITRK1, SPARCL1	557	28	20094	5.15363	1	0.58561	0.57503
GOTERM_BP_DIRECT	GO:0000904~cell morphogenesis involved in differentiation	3	0.468019	0.0419833	RELN, LAMC3, ENPP1	557	12	20094	9.01885	1	0.58561	0.57503
GOTERM_BP_DIRECT	GO:0060272~embryonic skeletal joint morphogenesis	3	0.468019	0.0419833	OSR2, OSR1, NOG	557	12	20094	9.01885	1	0.58561	0.57503
GOTERM_BP_DIRECT	GO:0060740~prostate gland epithelium morphogenesis	3	0.468019	0.0419833	FOXA1, TNC, CYP7B1	557	12	20094	9.01885	1	0.58561	0.57503
GOTERM_BP_DIRECT	GO:0046598~positive regulation of viral entry into host cell	3	0.468019	0.0419833	CD74, LGALS1, TMPRSS2	557	12	20094	9.01885	1	0.58561	0.57503
GOTERM_BP_DIRECT	GO:0042989~sequestering of actin monomers	3	0.468019	0.0419833	SCIN, GSN, TMSB15B1	557	12	20094	9.01885	1	0.58561	0.57503
GOTERM_BP_DIRECT	GO:0034392~negative regulation of smooth muscle cell apoptotic process	3	0.468019	0.0419833	NR4A3, LYPD3, AGTR1A	557	12	20094	9.01885	1	0.58561	0.57503
GOTERM_BP_DIRECT	GO:0030431~sleep	3	0.468019	0.0419833	OXTR, IL18, FOS	557	12	20094	9.01885	1	0.58561	0.57503
GOTERM_BP_DIRECT	GO:0071679~commissural neuron axon guidance	3	0.468019	0.0419833	SHH, NFIB, NCAM1	557	12	20094	9.01885	1	0.58561	0.57503
GOTERM_BP_DIRECT	GO:0009790~embryo development	6	0.936037	0.0421442	OSR2, SHH, BMP2, DLX4, OSR1, TPM1	557	69	20094	3.13699	1	0.58561	0.57503
GOTERM_BP_DIRECT	GO:0001947~heart looping	6	0.936037	0.0421442	SHH, MEF2C, WNT3A, ALDH1A2, HAND2, MICAL2	557	69	20094	3.13699	1	0.58561	0.57503
GOTERM_BP_DIRECT	GO:0001657~ureteric bud development	5	0.780031	0.043324	ROBO2, GSTA3, OSR1, NOG, SIM1	557	48	20094	3.75785	1	0.597008	0.586222
GOTERM_BP_DIRECT	GO:0031623~receptor internalization	5	0.780031	0.043324	CALCA, CAV1, LRRTM1, PTGER3, CD9	557	48	20094	3.75785	1	0.597008	0.586222
GOTERM_BP_DIRECT	GO:1904322~cellular response to forskolin	6	0.936037	0.0443976	EPHA5, PTGER3, ADCY2, ADCY8, CFTR, ADCY5	557	70	20094	3.09218	1	0.609274	0.598267
GOTERM_BP_DIRECT	GO:0043066~negative regulation of apoptotic process	27	4.21217	0.044597	PTGFR, CDKN1A, TWIST2, SCX, NOL3, CLU, AQP1, SHH, MPZ, PROK2, CTSH, IER3, NGFR, CD74, CAMK1D, EGR3, OSR1, WNT7A, MMP9, SOX10, BTC, HCK, NR4A3, BCL6, HAND2, FAS, CD44	557	657	20094	1.48255	1	0.609492	0.59848
GOTERM_BP_DIRECT	GO:0060045~positive regulation of cardiac muscle cell proliferation	4	0.624025	0.045206	MEF2C, HEY2, NCAM1, TBX5	557	29	20094	4.97592	1	0.615283	0.604166
GOTERM_BP_DIRECT	GO:0006811~ion transport	25	3.90016	0.0460269	RYR2, GABRB1, KCNE4, KCNC2, GRIK3, GRIK1, ATP1A2, TRPM5, ASIC3, SLC10A4, KCNH3, KCNJ13, GABRA4, CACNA2D3, CACNA2D2, P2RX7, TMEM37, FXYD3, KCNS2, TRPV4, FXYD1, FXYD7, SLC26A7, CFTR, ATP6V1B1	557	599	20094	1.50565	1	0.623899	0.612627
GOTERM_BP_DIRECT	GO:0051384~response to glucocorticoid	6	0.936037	0.0467218	FAS, ALPL, S100B, PTGDS, PAM, BMP6	557	71	20094	3.04863	1	0.630744	0.619349
GOTERM_BP_DIRECT	GO:0034765~regulation of ion transmembrane transport	9	1.40406	0.0487154	KCNH3, TMEM37, KCNE4, KCNS2, KCNC2, KCNJ13, CACNA2D3, CACNA2D2, TRPM5	557	145	20094	2.23916	1	0.634584	0.623119
GOTERM_BP_DIRECT	GO:0051450~myoblast proliferation	3	0.468019	0.048726	FGF7, FGFBP1, TBX18	557	13	20094	8.32509	1	0.634584	0.623119
GOTERM_BP_DIRECT	GO:0048251~elastic fiber assembly	3	0.468019	0.048726	LOX, LTBP3, FBLN5	557	13	20094	8.32509	1	0.634584	0.623119
GOTERM_BP_DIRECT	GO:0010459~negative regulation of heart rate	3	0.468019	0.048726	SPTBN4, AGTR2, TAC1	557	13	20094	8.32509	1	0.634584	0.623119
GOTERM_BP_DIRECT	GO:0016331~morphogenesis of embryonic epithelium	3	0.468019	0.048726	ALDH1A2, PCDH8, TBX18	557	13	20094	8.32509	1	0.634584	0.623119
GOTERM_BP_DIRECT	GO:1904383~response to sodium phosphate	3	0.468019	0.048726	ENPP1, ALPL, FGFR3	557	13	20094	8.32509	1	0.634584	0.623119
GOTERM_BP_DIRECT	GO:0032330~regulation of chondrocyte differentiation	3	0.468019	0.048726	MAF, PRKG2, PTHLH	557	13	20094	8.32509	1	0.634584	0.623119
GOTERM_BP_DIRECT	GO:0002087~regulation of respiratory gaseous exchange by neurological system process	3	0.468019	0.048726	NLGN3, NLGN1, ATP1A2	557	13	20094	8.32509	1	0.634584	0.623119
GOTERM_BP_DIRECT	GO:2000288~positive regulation of myoblast proliferation	3	0.468019	0.048726	FGF7, FGFBP1, TBX18	557	13	20094	8.32509	1	0.634584	0.623119
GOTERM_BP_DIRECT	GO:1900273~positive regulation of long-term synaptic potentiation	4	0.624025	0.049231	RELN, ADRB1, ADCY8, NRGN	557	30	20094	4.81005	1	0.636172	0.624679
GOTERM_BP_DIRECT	GO:0044344~cellular response to fibroblast growth factor stimulus	4	0.624025	0.049231	COL1A1, POSTN, EGR3, CD44	557	30	20094	4.81005	1	0.636172	0.624679
GOTERM_BP_DIRECT	GO:0045597~positive regulation of cell differentiation	6	0.936037	0.0515832	BTC, SHH, BMP2, WNT9A, CLU, FGFR3	557	73	20094	2.9651	1	0.659815	0.647894
GOTERM_BP_DIRECT	GO:0007157~heterophilic cell-cell adhesion via plasma membrane cell adhesion molecules	5	0.780031	0.0522105	NLGN1, CADM3, LGALS1, ALCAM, LGALS7	557	51	20094	3.5368	1	0.659815	0.647894
GOTERM_BP_DIRECT	GO:0030334~regulation of cell migration	8	1.24805	0.0529985	FGF7, SST, TMSB15B1, LAMA3, LMNA, FGF18, TNC, FGF20	557	122	20094	2.3656	1	0.659815	0.647894
GOTERM_BP_DIRECT	GO:0043616~keratinocyte proliferation	4	0.624025	0.0534248	FST, TWIST2, CDH13, WNT16	557	31	20094	4.65489	1	0.659815	0.647894
GOTERM_BP_DIRECT	GO:0045921~positive regulation of exocytosis	4	0.624025	0.0534248	ANXA2, VSNL1, CFTR, S100A10	557	31	20094	4.65489	1	0.659815	0.647894
GOTERM_BP_DIRECT	GO:0035050~embryonic heart tube development	4	0.624025	0.0534248	MEF2C, APELA, SOX18, GJA5	557	31	20094	4.65489	1	0.659815	0.647894
GOTERM_BP_DIRECT	GO:0006816~calcium ion transport	9	1.40406	0.0537361	P2RX7, TMEM37, RYR2, TRPV4, CAV1, CAMK2A, ANXA6, CACNA2D3, CACNA2D2	557	148	20094	2.19377	1	0.659815	0.647894
GOTERM_BP_DIRECT	GO:0086054~bundle of His cell to Purkinje myocyte communication by electrical coupling	2	0.312012	0.0545756	GJA5, TBX5	557	2	20094	36.0754	1	0.659815	0.647894
GOTERM_BP_DIRECT	GO:0060738~epithelial-mesenchymal signaling involved in prostate gland development	2	0.312012	0.0545756	FOXA1, SHH	557	2	20094	36.0754	1	0.659815	0.647894
GOTERM_BP_DIRECT	GO:0014891~striated muscle atrophy	2	0.312012	0.0545756	MYOG, GSN	557	2	20094	36.0754	1	0.659815	0.647894
GOTERM_BP_DIRECT	GO:0061196~fungiform papilla development	2	0.312012	0.0545756	WNT10B, SHH	557	2	20094	36.0754	1	0.659815	0.647894
GOTERM_BP_DIRECT	GO:0021740~principal sensory nucleus of trigeminal nerve development	2	0.312012	0.0545756	KIRREL3, NFIB	557	2	20094	36.0754	1	0.659815	0.647894
GOTERM_BP_DIRECT	GO:0070778~L-aspartate transport	2	0.312012	0.0545756	SLC1A1, SLC1A2	557	2	20094	36.0754	1	0.659815	0.647894
GOTERM_BP_DIRECT	GO:0002792~negative regulation of peptide secretion	2	0.312012	0.0545756	PTGER4, CD74	557	2	20094	36.0754	1	0.659815	0.647894
GOTERM_BP_DIRECT	GO:0072239~metanephric glomerulus vasculature development	2	0.312012	0.0545756	OSR1, AQP1	557	2	20094	36.0754	1	0.659815	0.647894
GOTERM_BP_DIRECT	GO:0060317~cardiac epithelial to mesenchymal transition	3	0.468019	0.055829	BMP2, HEY2, WNT16	557	14	20094	7.73044	1	0.659815	0.647894
GOTERM_BP_DIRECT	GO:0002067~glandular epithelial cell differentiation	3	0.468019	0.055829	NFIB, CAV1, KLF4	557	14	20094	7.73044	1	0.659815	0.647894
GOTERM_BP_DIRECT	GO:0060840~artery development	3	0.468019	0.055829	SHH, HEY2, ENPP1	557	14	20094	7.73044	1	0.659815	0.647894
GOTERM_BP_DIRECT	GO:0055062~phosphate ion homeostasis	3	0.468019	0.055829	ENPP1, ALPL, PTHLH	557	14	20094	7.73044	1	0.659815	0.647894
GOTERM_BP_DIRECT	GO:0060080~inhibitory postsynaptic potential	3	0.468019	0.055829	NLGN3, ADRB1, GRIK1	557	14	20094	7.73044	1	0.659815	0.647894
GOTERM_BP_DIRECT	GO:0003215~cardiac right ventricle morphogenesis	3	0.468019	0.055829	JAG1, HAND2, HEY2	557	14	20094	7.73044	1	0.659815	0.647894
GOTERM_BP_DIRECT	GO:0060413~atrial septum morphogenesis	3	0.468019	0.055829	GJA5, HEY2, TBX5	557	14	20094	7.73044	1	0.659815	0.647894
GOTERM_BP_DIRECT	GO:0045059~positive thymic T cell selection	3	0.468019	0.055829	CD74, ZAP70, SHH	557	14	20094	7.73044	1	0.659815	0.647894
GOTERM_BP_DIRECT	GO:2000347~positive regulation of hepatocyte proliferation	3	0.468019	0.055829	WNT3A, FGF18, IL18	557	14	20094	7.73044	1	0.659815	0.647894
GOTERM_BP_DIRECT	GO:0010468~regulation of gene expression	20	3.12012	0.0563421	FOXA1, NGFR, EMX2, TRP73, EN1, PANTR1, FOS, PRDM1, NOL3, CRIP1, PTHLH, NELL1, SHH, RELN, LOX, HEY2, PMP22, FAS, TRIM12A, ATP6V1B1	557	462	20094	1.56171	1	0.663519	0.651531
GOTERM_BP_DIRECT	GO:0001892~embryonic placenta development	4	0.624025	0.0577842	FOXD3, CEBPA, CEBPB, PRDM1	557	32	20094	4.50943	1	0.678096	0.665845
GOTERM_BP_DIRECT	GO:0072089~stem cell proliferation	6	0.936037	0.059409	OSR2, SHH, CDKN2C, NFIB, TLX1, TBX18	557	76	20094	2.84806	1	0.694709	0.682158
GOTERM_BP_DIRECT	GO:0006915~apoptotic process	26	4.05616	0.0610494	ADRB1, LGALS1, ZFP385B, S100A14, LGALS7, PHLDA3, NGFR, MEF2C, GSN, GADD45B, APLP1, TRP73, WNT7A, IRAK3, UNC5D, MMP9, SH3RF3, BTC, IFI27, HAND2, GJB6, TRAF5, FAS, FGFR3, S100A9, S100A8	557	652	20094	1.43859	1	0.709834	0.697009
GOTERM_BP_DIRECT	GO:0007224~smoothened signaling pathway	7	1.09204	0.0614803	FOXA1, WNT10B, SHH, PTCH2, NOG, ENPP1, WNT9A	557	101	20094	2.50028	1	0.709834	0.697009
GOTERM_BP_DIRECT	GO:0010976~positive regulation of neuron projection development	10	1.56006	0.0615051	NTRK2, NGFR, NLGN1, RELN, CAMK1D, FEZ1, STMN2, NGF, S100A9, CXCL5	557	179	20094	2.01539	1	0.709834	0.697009
GOTERM_BP_DIRECT	GO:1990138~neuron projection extension	4	0.624025	0.062306	BCAN, POSTN, ALCAM, FLRT1	557	33	20094	4.37278	1	0.709834	0.697009
GOTERM_BP_DIRECT	GO:0050900~leukocyte migration	4	0.624025	0.062306	FOXJ1, F2RL1, MADCAM1, MMP9	557	33	20094	4.37278	1	0.709834	0.697009
GOTERM_BP_DIRECT	GO:0009952~anterior/posterior pattern specification	8	1.24805	0.0630578	EMX2, SHH, IFITM1, WNT3A, ALDH1A2, HEY2, BHLHE41, HOXD8	557	127	20094	2.27247	1	0.709834	0.697009
GOTERM_BP_DIRECT	GO:0003084~positive regulation of systemic arterial blood pressure	3	0.468019	0.0632673	RARRES2, ADRB1, AVPR1A	557	15	20094	7.21508	1	0.709834	0.697009
GOTERM_BP_DIRECT	GO:0030858~positive regulation of epithelial cell differentiation	3	0.468019	0.0632673	WNT10B, BMP2, WNT9A	557	15	20094	7.21508	1	0.709834	0.697009
GOTERM_BP_DIRECT	GO:0006900~membrane budding	3	0.468019	0.0632673	P2RX7, ANXA2, S100A10	557	15	20094	7.21508	1	0.709834	0.697009
GOTERM_BP_DIRECT	GO:0019732~antifungal humoral response	3	0.468019	0.0632673	NPY, RARRES2, TAC1	557	15	20094	7.21508	1	0.709834	0.697009
GOTERM_BP_DIRECT	GO:0003184~pulmonary valve morphogenesis	3	0.468019	0.0632673	ROBO2, JAG1, HEY2	557	15	20094	7.21508	1	0.709834	0.697009
GOTERM_BP_DIRECT	GO:0043117~positive regulation of vascular permeability	3	0.468019	0.0632673	TRPV4, IL18, BMP6	557	15	20094	7.21508	1	0.709834	0.697009
GOTERM_BP_DIRECT	GO:0030335~positive regulation of cell migration	13	2.02808	0.0636977	SEMA6B, CAV1, TWIST2, SEMA4F, MMP9, ADRA2A, AQP1, COL1A1, BMP2, CDH13, CTSH, F2RL1, LGR6	557	264	20094	1.77644	1	0.711838	0.698977
GOTERM_BP_DIRECT	GO:0050727~regulation of inflammatory response	7	1.09204	0.0638746	ANXA1, BCL6, ALOX15, TNC, PMP22, MGLL, S100A8	557	102	20094	2.47576	1	0.711838	0.698977
GOTERM_BP_DIRECT	GO:0014068~positive regulation of phosphatidylinositol 3-kinase signaling	6	0.936037	0.0649814	NTRK2, RELN, IL18, F2RL1, WNT16, DCN	557	78	20094	2.77503	1	0.72175	0.70871
GOTERM_BP_DIRECT	GO:0009968~negative regulation of signal transduction	5	0.780031	0.0654814	RIPOR2, SOCS1, CAV1, LDLRAD4, RGS6	557	55	20094	3.27958	1	0.724879	0.711782
GOTERM_BP_DIRECT	GO:0010043~response to zinc ion	4	0.624025	0.0669869	P2RX7, KRT14, PAM, CRIP1	557	34	20094	4.24417	1	0.734203	0.720938
GOTERM_BP_DIRECT	GO:1904706~negative regulation of vascular smooth muscle cell proliferation	4	0.624025	0.0669869	MEF2C, CDKN1A, CAV1, TPM1	557	34	20094	4.24417	1	0.734203	0.720938
GOTERM_BP_DIRECT	GO:0019933~cAMP-mediated signaling	4	0.624025	0.0669869	EPHA5, ADGRG6, ADCY2, ADCY8	557	34	20094	4.24417	1	0.734203	0.720938
GOTERM_BP_DIRECT	GO:0060395~SMAD protein signal transduction	6	0.936037	0.0708363	GDF10, BMP3, BMP2, APELA, FOS, BMP6	557	80	20094	2.70566	1	0.750078	0.736527
GOTERM_BP_DIRECT	GO:0007611~learning or memory	6	0.936037	0.0708363	MEF2C, THRA, SLC1A1, FZD9, NCAM1, S100B	557	80	20094	2.70566	1	0.750078	0.736527
GOTERM_BP_DIRECT	GO:0006940~regulation of smooth muscle contraction	3	0.468019	0.0710171	CAV1, ATP1A2, ADRA2A	557	16	20094	6.76414	1	0.750078	0.736527
GOTERM_BP_DIRECT	GO:0019725~cellular homeostasis	3	0.468019	0.0710171	ENPP1, ALPL, AQP1	557	16	20094	6.76414	1	0.750078	0.736527
GOTERM_BP_DIRECT	GO:0032717~negative regulation of interleukin-8 production	3	0.468019	0.0710171	ANXA1, ANXA4, KLF4	557	16	20094	6.76414	1	0.750078	0.736527
GOTERM_BP_DIRECT	GO:0021846~cell proliferation in forebrain	3	0.468019	0.0710171	EMX2, WNT3A, WNT7A	557	16	20094	6.76414	1	0.750078	0.736527
GOTERM_BP_DIRECT	GO:0046632~alpha-beta T cell differentiation	3	0.468019	0.0710171	ZAP70, SHH, ANXA1	557	16	20094	6.76414	1	0.750078	0.736527
GOTERM_BP_DIRECT	GO:0042633~hair cycle	3	0.468019	0.0710171	PTCH2, KRT14, SOX21	557	16	20094	6.76414	1	0.750078	0.736527
GOTERM_BP_DIRECT	GO:0030857~negative regulation of epithelial cell differentiation	3	0.468019	0.0710171	CAV1, FST, OSR1	557	16	20094	6.76414	1	0.750078	0.736527
GOTERM_BP_DIRECT	GO:0032270~positive regulation of cellular protein metabolic process	3	0.468019	0.0710171	WNT7A, KLF4, AGTR1A	557	16	20094	6.76414	1	0.750078	0.736527
GOTERM_BP_DIRECT	GO:0046330~positive regulation of JNK cascade	7	1.09204	0.0713822	SH3RF3, GADD45B, TRPV4, TRAF5, WNT7A, F2RL1, WNT16	557	105	20094	2.40503	1	0.750078	0.736527
GOTERM_BP_DIRECT	GO:0035904~aorta development	4	0.624025	0.0718232	ROBO2, LOX, ENPP1, PRDM1	557	35	20094	4.1229	1	0.750078	0.736527
GOTERM_BP_DIRECT	GO:0071542~dopaminergic neuron differentiation	4	0.624025	0.0718232	FOXA1, SHH, WNT3A, EN1	557	35	20094	4.1229	1	0.750078	0.736527
GOTERM_BP_DIRECT	GO:0035116~embryonic hindlimb morphogenesis	4	0.624025	0.0718232	OSR2, SHH, OSR1, WNT7A	557	35	20094	4.1229	1	0.750078	0.736527
GOTERM_BP_DIRECT	GO:0055001~muscle cell development	4	0.624025	0.0718232	LOX, PMP22, CACNA2D2, FLNC	557	35	20094	4.1229	1	0.750078	0.736527
GOTERM_BP_DIRECT	GO:0003151~outflow tract morphogenesis	5	0.780031	0.0727141	MEF2C, GJA5, ELN, NOG, HEY2	557	57	20094	3.16451	1	0.754636	0.741003
GOTERM_BP_DIRECT	GO:0001817~regulation of cytokine production	5	0.780031	0.0727141	JPH4, SOCS1, BCL6, ADAM33, S100B	557	57	20094	3.16451	1	0.754636	0.741003
GOTERM_BP_DIRECT	GO:0060021~palate development	6	0.936037	0.073869	OSR2, SHH, MEF2C, HAND2, OSR1, COL11A2	557	81	20094	2.67225	1	0.764233	0.750426
GOTERM_BP_DIRECT	GO:0070371~ERK1 and ERK2 cascade	5	0.780031	0.0764766	PTGER4, OXTR, FGF18, CTSH, FGFR3	557	58	20094	3.10995	1	0.770492	0.756571
GOTERM_BP_DIRECT	GO:0001756~somitogenesis	5	0.780031	0.0764766	IFITM1, WNT3A, PCDH8, TBX18, PAX1	557	58	20094	3.10995	1	0.770492	0.756571
GOTERM_BP_DIRECT	GO:0050919~negative chemotaxis	4	0.624025	0.0768112	RTN4R, SEMA6B, RTN4RL1, SEMA4F	557	36	20094	4.00838	1	0.770492	0.756571
GOTERM_BP_DIRECT	GO:0086005~ventricular cardiac muscle cell action potential	3	0.468019	0.0790555	RYR2, KCNE4, GJA5	557	17	20094	6.36625	1	0.770492	0.756571
GOTERM_BP_DIRECT	GO:0071880~adenylate cyclase-activating adrenergic receptor signaling pathway	3	0.468019	0.0790555	ADRB1, ADRA1B, ADRA2A	557	17	20094	6.36625	1	0.770492	0.756571
GOTERM_BP_DIRECT	GO:0021675~nerve development	3	0.468019	0.0790555	NGFR, NRTN, NGF	557	17	20094	6.36625	1	0.770492	0.756571
GOTERM_BP_DIRECT	GO:0086004~regulation of cardiac muscle cell contraction	3	0.468019	0.0790555	FXYD1, ADRB1, ATP1A2	557	17	20094	6.36625	1	0.770492	0.756571
GOTERM_BP_DIRECT	GO:0021859~pyramidal neuron differentiation	2	0.312012	0.0807381	BCL6, UNC5D	557	3	20094	24.0503	1	0.770492	0.756571
GOTERM_BP_DIRECT	GO:1904891~positive regulation of excitatory synapse assembly	2	0.312012	0.0807381	WNT7A, VSTM5	557	3	20094	24.0503	1	0.770492	0.756571
GOTERM_BP_DIRECT	GO:0036023~embryonic skeletal limb joint morphogenesis	2	0.312012	0.0807381	OSR2, OSR1	557	3	20094	24.0503	1	0.770492	0.756571
GOTERM_BP_DIRECT	GO:0061182~negative regulation of chondrocyte development	2	0.312012	0.0807381	PTHLH, RFLNA	557	3	20094	24.0503	1	0.770492	0.756571
GOTERM_BP_DIRECT	GO:1904346~positive regulation of gastric mucosal blood circulation	2	0.312012	0.0807381	PTGER2, PTGER3	557	3	20094	24.0503	1	0.770492	0.756571
GOTERM_BP_DIRECT	GO:1900135~positive regulation of renin secretion into blood stream	2	0.312012	0.0807381	F2RL1, ADRB1	557	3	20094	24.0503	1	0.770492	0.756571
GOTERM_BP_DIRECT	GO:0035377~transepithelial water transport	2	0.312012	0.0807381	CFTR, AQP1	557	3	20094	24.0503	1	0.770492	0.756571
GOTERM_BP_DIRECT	GO:2000124~regulation of endocannabinoid signaling pathway	2	0.312012	0.0807381	CAMK2A, MGLL	557	3	20094	24.0503	1	0.770492	0.756571
GOTERM_BP_DIRECT	GO:0010840~regulation of circadian sleep/wake cycle, wakefulness	2	0.312012	0.0807381	PTGER4, PTGER3	557	3	20094	24.0503	1	0.770492	0.756571
GOTERM_BP_DIRECT	GO:1905686~positive regulation of plasma membrane repair	2	0.312012	0.0807381	ANXA2, S100A10	557	3	20094	24.0503	1	0.770492	0.756571
GOTERM_BP_DIRECT	GO:0061144~alveolar secondary septum development	2	0.312012	0.0807381	FOXA1, FGFR3	557	3	20094	24.0503	1	0.770492	0.756571
GOTERM_BP_DIRECT	GO:2001212~regulation of vasculogenesis	2	0.312012	0.0807381	HEY2, EMP2	557	3	20094	24.0503	1	0.770492	0.756571
GOTERM_BP_DIRECT	GO:0098910~regulation of atrial cardiac muscle cell action potential	2	0.312012	0.0807381	RYR2, GJA5	557	3	20094	24.0503	1	0.770492	0.756571
GOTERM_BP_DIRECT	GO:0001997~positive regulation of the force of heart contraction by epinephrine-norepinephrine	2	0.312012	0.0807381	ADRB1, ADRA1B	557	3	20094	24.0503	1	0.770492	0.756571
GOTERM_BP_DIRECT	GO:2000729~positive regulation of mesenchymal cell proliferation involved in ureter development	2	0.312012	0.0807381	SHH, TBX18	557	3	20094	24.0503	1	0.770492	0.756571
GOTERM_BP_DIRECT	GO:0071801~regulation of podosome assembly	2	0.312012	0.0807381	HCK, GSN	557	3	20094	24.0503	1	0.770492	0.756571
GOTERM_BP_DIRECT	GO:0031104~dendrite regeneration	2	0.312012	0.0807381	FAS, MATN2	557	3	20094	24.0503	1	0.770492	0.756571
GOTERM_BP_DIRECT	GO:0034516~response to vitamin B6	2	0.312012	0.0807381	ENPP1, ALPL	557	3	20094	24.0503	1	0.770492	0.756571
GOTERM_BP_DIRECT	GO:0070488~neutrophil aggregation	2	0.312012	0.0807381	S100A9, S100A8	557	3	20094	24.0503	1	0.770492	0.756571
GOTERM_BP_DIRECT	GO:1900625~positive regulation of monocyte aggregation	2	0.312012	0.0807381	NR4A3, CD44	557	3	20094	24.0503	1	0.770492	0.756571
GOTERM_BP_DIRECT	GO:0042593~glucose homeostasis	9	1.40406	0.0814421	FOXA1, NGFR, CEBPA, BACE2, TRPV4, ENPP1, ADCY8, ADRA1B, ADRA2A	557	162	20094	2.00419	1	0.774984	0.760982
GOTERM_BP_DIRECT	GO:0006935~chemotaxis	8	1.24805	0.0839041	ROBO2, RIPOR2, CMTM5, RARRES2, PROK2, S100A9, CXCL5, S100A8	557	136	20094	2.12208	1	0.79613	0.781746
GOTERM_BP_DIRECT	GO:0007416~synapse assembly	5	0.780031	0.0842881	NLGN3, KIRREL3, NLGN1, SLITRK1, WNT7A	557	60	20094	3.00628	1	0.797495	0.783087
GOTERM_BP_DIRECT	GO:0030010~establishment of cell polarity	4	0.624025	0.0872267	SHH, FEZ1, LMNA, WNT7A	557	38	20094	3.79741	1	0.801448	0.786969
GOTERM_BP_DIRECT	GO:2001235~positive regulation of apoptotic signaling pathway	4	0.624025	0.0872267	NGFR, TRP73, FAS, CTSH	557	38	20094	3.79741	1	0.801448	0.786969
GOTERM_BP_DIRECT	GO:0008219~cell death	4	0.624025	0.0872267	P2RX7, PMP22, EMP2, EMP3	557	38	20094	3.79741	1	0.801448	0.786969
GOTERM_BP_DIRECT	GO:2001244~positive regulation of intrinsic apoptotic signaling pathway	4	0.624025	0.0872267	CAV1, CLU, S100A9, S100A8	557	38	20094	3.79741	1	0.801448	0.786969
GOTERM_BP_DIRECT	GO:0050807~regulation of synapse organization	4	0.624025	0.0872267	PTPRT, WNT3A, SLITRK1, SPARCL1	557	38	20094	3.79741	1	0.801448	0.786969
GOTERM_BP_DIRECT	GO:0001655~urogenital system development	3	0.468019	0.0873605	OSR2, OSR1, NOG	557	18	20094	6.01257	1	0.801448	0.786969
GOTERM_BP_DIRECT	GO:2000649~regulation of sodium ion transmembrane transporter activity	3	0.468019	0.0873605	FXYD3, FXYD1, FXYD7	557	18	20094	6.01257	1	0.801448	0.786969
GOTERM_BP_DIRECT	GO:0071625~vocalization behavior	3	0.468019	0.0873605	NLGN3, SRPX2, SHANK1	557	18	20094	6.01257	1	0.801448	0.786969
GOTERM_BP_DIRECT	GO:0010812~negative regulation of cell-substrate adhesion	3	0.468019	0.0873605	COL1A1, LGALS1, SPOCK1	557	18	20094	6.01257	1	0.801448	0.786969
GOTERM_BP_DIRECT	GO:0014002~astrocyte development	3	0.468019	0.0873605	LAMC3, S100A9, S100A8	557	18	20094	6.01257	1	0.801448	0.786969
GOTERM_BP_DIRECT	GO:0015701~bicarbonate transport	3	0.468019	0.0873605	PTGER3, SLC26A7, CFTR	557	18	20094	6.01257	1	0.801448	0.786969
GOTERM_BP_DIRECT	GO:0007268~chemical synaptic transmission	10	1.56006	0.090809	NLGN3, GABRB1, NLGN1, CHRM1, NPY, GABRA4, PCDH8, PENK, DOC2B, TAC1	557	194	20094	1.85956	1	0.83079	0.81578
GOTERM_BP_DIRECT	GO:0051482~positive regulation of cytosolic calcium ion concentration involved in phospholipase C-activating G-protein coupled signaling pathway	4	0.624025	0.0926459	CALCA, F2RL1, AGTR1A, RXFP3	557	39	20094	3.70004	1	0.840648	0.82546
GOTERM_BP_DIRECT	GO:0001708~cell fate specification	4	0.624025	0.0926459	TBX15, SHH, TBX5, TBX18	557	39	20094	3.70004	1	0.840648	0.82546
GOTERM_BP_DIRECT	GO:0055007~cardiac muscle cell differentiation	4	0.624025	0.0926459	MEF2C, BMP2, HAND2, TBX5	557	39	20094	3.70004	1	0.840648	0.82546
GOTERM_BP_DIRECT	GO:0009190~cyclic nucleotide biosynthetic process	3	0.468019	0.0959115	ADCY2, ADCY8, ADCY5	557	19	20094	5.69612	1	0.856242	0.840772
GOTERM_BP_DIRECT	GO:0035994~response to muscle stretch	3	0.468019	0.0959115	RYR2, GSN, FOS	557	19	20094	5.69612	1	0.856242	0.840772
GOTERM_BP_DIRECT	GO:0001953~negative regulation of cell-matrix adhesion	3	0.468019	0.0959115	POSTN, JAG1, BCL6	557	19	20094	5.69612	1	0.856242	0.840772
GOTERM_BP_DIRECT	GO:0001523~retinoid metabolic process	3	0.468019	0.0959115	ALDH1A2, RARRES2, ADH7	557	19	20094	5.69612	1	0.856242	0.840772
GOTERM_BP_DIRECT	GO:0001878~response to yeast	3	0.468019	0.0959115	NPY, PTX3, TAC1	557	19	20094	5.69612	1	0.856242	0.840772
GOTERM_BP_DIRECT	GO:0060044~negative regulation of cardiac muscle cell proliferation	3	0.468019	0.0959115	NOG, TRP73, TBX5	557	19	20094	5.69612	1	0.856242	0.840772
GOTERM_BP_DIRECT	GO:0034394~protein localization to cell surface	4	0.624025	0.0982006	FGF7, EMP2, FBLN5, CD177	557	40	20094	3.60754	1	0.86638	0.850727
GOTERM_BP_DIRECT	GO:0030177~positive regulation of Wnt signaling pathway	4	0.624025	0.0982006	SHH, BMP2, RSPO3, LGR6	557	40	20094	3.60754	1	0.86638	0.850727
GOTERM_BP_DIRECT	GO:0050772~positive regulation of axonogenesis	4	0.624025	0.0982006	ROBO2, CHODL, NTRK2, SLITRK1	557	40	20094	3.60754	1	0.86638	0.850727
