# Supplementary material for: Transcriptomic analysis of the upper lip and primary palate development in mice
Source: Front Genet. 2023 Jan 6;13:1039850. doi: 10.3389/fgene.2022.1039850 (PMC9852879; doi:10.3389/fgene.2022.1039850)
Supplement: Supplementary file 6 [file Table5.XLSX]

## Sheet: groupE11 5vsgroupE10 5_deg_down
Category	Term	Count	%	PValue	Genes	List Total	Pop Hits	Pop Total	Fold Enrichment	Bonferroni	Benjamini	FDR
KEGG_PATHWAY	mmu05224:Breast cancer	11	2.35043	0.000175947	FGF15, SHC3, FGF8, FZD5, FGF18, FZD8, WNT7A, WNT8B, DLL1, HES5, DLL3	152	147	8992	4.42678	0.0432054	0.0441627	0.0436349
KEGG_PATHWAY	mmu04550:Signaling pathways regulating pluripotency of stem cells	10	2.13675	0.000564654	SOX2, FZD5, ZIC3, FZD8, WNT7A, WNT8B, LHX5, PAX6, DUSP9, MAPK12	152	140	8992	4.22556	0.132178	0.0708641	0.0700172
KEGG_PATHWAY	mmu04950:Maturity onset diabetes of the young	5	1.06838	0.000992636	PKLR, PAX6, BHLHA15, NKX6-1, NKX2-2	152	27	8992	10.9552	0.220635	0.0714685	0.0706143
KEGG_PATHWAY	mmu04390:Hippo signaling pathway	10	2.13675	0.00128224	SOX2, CRB2, CRB1, FZD5, PPP2R2C, FZD8, WNT7A, WNT8B, BBC3, LLGL2	152	157	8992	3.76802	0.275337	0.0714685	0.0706143
KEGG_PATHWAY	mmu04916:Melanogenesis	8	1.7094	0.00142368	DCT, FZD5, PRKCB, CAMK2A, FZD8, WNT7A, WNT8B, MITF	152	100	8992	4.73263	0.300645	0.0714685	0.0706143
KEGG_PATHWAY	mmu05226:Gastric cancer	9	1.92308	0.00371384	SHH, FGF15, SHC3, FGF8, FZD5, FGF18, FZD8, WNT7A, WNT8B	152	150	8992	3.54947	0.606985	0.155362	0.153505
KEGG_PATHWAY	mmu01230:Biosynthesis of amino acids	6	1.28205	0.0104033	THA1, PKLR, ENO1B, ENO3, GAPDH, ENO4	152	79	8992	4.493	0.927554	0.373034	0.368576
KEGG_PATHWAY	mmu04066:HIF-1 signaling pathway	7	1.49573	0.0122627	TFRC, PRKCB, CAMK2A, ENO1B, ENO3, GAPDH, ENO4	152	114	8992	3.6325	0.954814	0.384744	0.380145
KEGG_PATHWAY	mmu01200:Carbon metabolism	7	1.49573	0.016074	PKLR, GLDC, ENO1B, AMT, ENO3, GAPDH, ENO4	152	121	8992	3.42236	0.982877	0.421216	0.416181
KEGG_PATHWAY	mmu04727:GABAergic synapse	6	1.28205	0.0167815	SLC32A1, PRKCB, SLC6A13, GAD2, HAP1, SLC6A1	152	89	8992	3.98817	0.985706	0.421216	0.416181
KEGG_PATHWAY	mmu05200:Pathways in cancer	17	3.63248	0.0197968	FZD5, ITGA3, PRKCB, ZBTB16, CAMK2A, FZD8, WNT7A, WNT8B, MITF, DLL1, DLL3, BBC3, SHH, FGF15, FGF8, FGF18, HES5	152	543	8992	1.85209	0.993388	0.426039	0.420947
KEGG_PATHWAY	mmu05217:Basal cell carcinoma	5	1.06838	0.0211734	SHH, FZD5, FZD8, WNT7A, WNT8B	152	63	8992	4.69507	0.995353	0.426039	0.420947
KEGG_PATHWAY	mmu05205:Proteoglycans in cancer	9	1.92308	0.0220658	SHH, FZD5, ERBB4, PRKCB, CAMK2A, FZD8, WNT7A, WNT8B, MAPK12	152	205	8992	2.59718	0.996304	0.426039	0.420947
KEGG_PATHWAY	mmu00010:Glycolysis / Gluconeogenesis	5	1.06838	0.0258898	PKLR, ENO1B, ENO3, GAPDH, ENO4	152	67	8992	4.41477	0.998618	0.456771	0.451311
KEGG_PATHWAY	mmu00250:Alanine, aspartate and glutamate metabolism	4	0.854701	0.0272971	PPAT, GAD2, NAT8L, RIMKLA	152	39	8992	6.06748	0.999038	0.456771	0.451311
KEGG_PATHWAY	mmu00260:Glycine, serine and threonine metabolism	4	0.854701	0.0291563	THA1, GLDC, AMT, PIPOX	152	40	8992	5.91579	0.999405	0.45739	0.451923
KEGG_PATHWAY	mmu04360:Axon guidance	8	1.7094	0.0326925	NTNG2, ROBO3, SEMA5B, SHH, UNC5A, CAMK2A, EPHB1, NGEF	152	181	8992	2.61471	0.999762	0.46769	0.4621
KEGG_PATHWAY	mmu04514:Cell adhesion molecules	8	1.7094	0.0335395	IGSF11, NTNG2, CLDN10, CNTNAP2, H2-K1, NRXN3, NRCAM, JAM2	152	182	8992	2.60035	0.999809	0.46769	0.4621
KEGG_PATHWAY	mmu04721:Synaptic vesicle cycle	5	1.06838	0.0402576	SLC32A1, SLC6A13, SLC1A2, SLC6A1, CPLX3	152	77	8992	3.84142	0.999967	0.531824	0.525467
KEGG_PATHWAY	mmu04310:Wnt signaling pathway	7	1.49573	0.0679881	FZD5, PRKCB, CAMK2A, CCDC88C, FZD8, WNT7A, WNT8B	152	171	8992	2.42167	1	0.85325	0.843052
KEGG_PATHWAY	mmu04330:Notch signaling pathway	4	0.854701	0.0795067	DTX4, DLL1, HES5, DLL3	152	60	8992	3.94386	1	0.950295	0.938937

## Sheet: groupE11 5vsgroupE10 5_deg_up
Category	Term	Count	%	PValue	Genes	List Total	Pop Hits	Pop Total	Fold Enrichment	Bonferroni	Benjamini	FDR
KEGG_PATHWAY	mmu04974:Protein digestion and absorption	23	3.78289	9.73479e-14	COL17A1, COL16A1, MME, COL24A1, COL25A1, ELN, COL12A1, COL19A1, SLC8A1, COL1A1, COL3A1, COL1A2, COL5A1, XPNPEP2, COL6A2, COL7A1, COL5A2, COL6A1, COL8A2, COL6A3, COL8A1, COL6A6, COL9A2	247	108	8992	7.75289	2.26864e-11	2.26821e-11	1.94696e-11
KEGG_PATHWAY	mmu04310:Wnt signaling pathway	23	3.78289	1.25302e-09	WNT10B, WNT3A, LEF1, WNT5A, NFATC2, NFATC1, FZD10, PRICKLE1, APCDD1, DKK1, NKD1, DKK2, NKD2, DKK4, WNT11, WIF1, DAAM2, FRZB, RSPO2, RSPO3, NOTUM, LGR6, PLCB1	247	171	8992	4.89656	2.91953e-07	1.45976e-07	1.25302e-07
KEGG_PATHWAY	mmu04512:ECM-receptor interaction	15	2.46711	9.63819e-08	LAMA2, LAMA3, TNC, GP1BA, THBS2, GP6, COL1A1, COL1A2, TNN, COL6A2, COL6A1, ITGA8, COL6A3, COL6A6, COL9A2	247	88	8992	6.20537	2.24567e-05	7.48566e-06	6.42546e-06
KEGG_PATHWAY	mmu04934:Cushing syndrome	16	2.63158	3.54838e-05	HSD3B6, WNT10B, CDKN2B, WNT3A, LEF1, WNT5A, ADCY2, CACNA1C, AHR, FZD10, EGFR, ADCY5, CACNA1G, WNT11, PLCB1, CREB5	247	162	8992	3.59554	0.00823379	0.00177999	0.00152789
KEGG_PATHWAY	mmu04924:Renin secretion	11	1.80921	3.81973e-05	PTGER4, EDNRA, PDE1A, ADORA1, PDE3A, PRKG2, CACNA1C, PLCB1, KCNJ2, AQP1, ADCY5	247	76	8992	5.26912	0.00886065	0.00177999	0.00152789
KEGG_PATHWAY	mmu05414:Dilated cardiomyopathy	12	1.97368	4.77724e-05	RYR2, TGFB2, SGCD, LAMA2, LMNA, CACNA2D3, ITGA8, ADCY2, CACNA1C, CACNG4, SLC8A1, ADCY5	247	94	8992	4.64743	0.0110695	0.00185516	0.00159241
KEGG_PATHWAY	mmu04022:cGMP-PKG signaling pathway	16	2.63158	7.59765e-05	ATP2B4, NFATC2, NFATC1, ADCY2, CACNA1C, ADRA1B, SLC8A1, ADRA2A, ADCY5, EDNRA, KCNMB2, ADORA1, PDE3A, PRKG2, PLCB1, CREB5	247	173	8992	3.36692	0.0175474	0.00252893	0.00217076
KEGG_PATHWAY	mmu04390:Hippo signaling pathway	15	2.46711	9.75535e-05	WNT10B, TGFB2, WNT3A, LEF1, WNT5A, TRP73, FZD10, NKD1, NKD2, GDF7, BMP2, WNT11, DLG2, FRMD6, SNAI2	247	157	8992	3.47817	0.0224747	0.00284125	0.00243884
KEGG_PATHWAY	mmu04080:Neuroactive ligand-receptor interaction	25	4.11184	0.000140831	GRIA1, PTGER4, GRIA2, CHRNA5, PTH1R, NTS, ADRA1B, GHR, MC4R, HTR6, EDNRA, GRM7, PENK, LEPR, ADORA1, S1PR3, GABRP, GABRA1, NPY1R, HTR1B, AVPR1A, ADRA2A, SSTR5, AGTR2, F2RL2	247	386	8992	2.35783	0.0322833	0.00303852	0.00260818
KEGG_PATHWAY	mmu05165:Human papillomavirus infection	24	3.94737	0.000140921	PTGER4, WNT10B, LAMA2, WNT3A, LAMA3, WNT5A, TNC, FZD10, THBS2, EGFR, COL1A1, COL1A2, WNT11, DLG2, TNN, COL6A2, COL6A1, HEY2, ITGA8, COL6A3, COL6A6, COL9A2, CREB5, OASL2	247	362	8992	2.41358	0.0323037	0.00303852	0.00260818
KEGG_PATHWAY	mmu04060:Cytokine-cytokine receptor interaction	21	3.45395	0.00014345	GDF10, GM10591, TGFB2, IL1R1, IL10RB, MPL, INHBA, PPBP, NGF, CXCL14, GDF7, GHR, BMP3, IL1RL2, BMP2, IL18RAP, CLCF1, LEPR, TNFRSF14, IL11RA1, PF4	247	292	8992	2.61816	0.0328737	0.00303852	0.00260818
KEGG_PATHWAY	mmu05412:Arrhythmogenic right ventricular cardiomyopathy	10	1.64474	0.000236159	RYR2, SGCD, LAMA2, LMNA, LEF1, CACNA2D3, ITGA8, CACNA1C, CACNG4, SLC8A1	247	77	8992	4.7279	0.0535448	0.00458543	0.00393599
KEGG_PATHWAY	mmu04350:TGF-beta signaling pathway	11	1.80921	0.000256643	GREM1, GREM2, TGFB2, CDKN2B, BMP2, FST, SMAD9, INHBA, NBL1, FBN1, GDF7	247	95	8992	4.2153	0.0580522	0.00459983	0.00394835
KEGG_PATHWAY	mmu04151:PI3K-Akt signaling pathway	23	3.78289	0.000328007	PDGFRA, LAMA2, LAMA3, MAGI2, TNC, NGF, THBS2, FGF2, EGFR, GHR, COL1A1, EFNA3, COL1A2, GNG4, TNN, COL6A2, COL6A1, ITGA8, COL6A3, COL6A6, COL9A2, SGK1, CREB5	247	359	8992	2.33234	0.0735898	0.00514337	0.00441491
KEGG_PATHWAY	mmu04713:Circadian entrainment	11	1.80921	0.000331119	GRIA1, GRIA2, RYR2, KCNJ6, GNG4, PRKG2, ADCY2, CACNA1C, PLCB1, ADCY5, CACNA1G	247	98	8992	4.08626	0.0742614	0.00514337	0.00441491
KEGG_PATHWAY	mmu04510:Focal adhesion	16	2.63158	0.000399077	PDGFRA, LAMA2, CAV1, LAMA3, TNC, THBS2, EGFR, COL1A1, COL1A2, TNN, COL6A2, COL6A1, ITGA8, COL6A3, COL6A6, COL9A2	247	201	8992	2.8979	0.0888097	0.00581156	0.00498846
KEGG_PATHWAY	mmu05032:Morphine addiction	10	1.64474	0.000823445	GABRP, GABRA1, KCNJ6, GNG4, PDE1A, ADORA1, PDE3A, ADCY2, PDE7B, ADCY5	247	91	8992	4.00053	0.174645	0.010659	0.00914939
KEGG_PATHWAY	mmu05410:Hypertrophic cardiomyopathy	10	1.64474	0.000823445	RYR2, TGFB2, SGCD, LAMA2, LMNA, CACNA2D3, ITGA8, CACNA1C, CACNG4, SLC8A1	247	91	8992	4.00053	0.174645	0.010659	0.00914939
KEGG_PATHWAY	mmu04020:Calcium signaling pathway	17	2.79605	0.000884823	PDGFRA, RYR2, PDE1A, ATP2B4, ADCY2, CACNA1C, MST1R, AVPR1A, NGF, ADRA1B, FGF2, EGFR, SLC8A1, CACNA1G, HTR6, EDNRA, PLCB1	247	240	8992	2.57868	0.186374	0.0108507	0.00931392
KEGG_PATHWAY	mmu04024:cAMP signaling pathway	16	2.63158	0.00102206	GRIA1, GRIA2, RYR2, ATP2B4, NPY1R, HTR1B, NFATC1, ADCY2, CACNA1C, SSTR5, ADCY5, HTR6, EDNRA, ADORA1, PDE3A, CREB5	247	220	8992	2.64763	0.212004	0.011907	0.0102206
KEGG_PATHWAY	mmu05205:Proteoglycans in cancer	15	2.46711	0.00147215	WNT10B, TGFB2, HPSE2, WNT3A, CAV1, MMP2, WNT5A, FZD10, FGF2, EGFR, COL1A1, COL1A2, WNT11, MRAS, HPSE	247	205	8992	2.66377	0.29055	0.0163339	0.0140205
KEGG_PATHWAY	mmu05217:Basal cell carcinoma	8	1.31579	0.00157882	WNT10B, BMP2, WNT11, GADD45B, WNT3A, WNT5A, LEF1, FZD10	247	63	8992	4.62284	0.307991	0.0163678	0.0140496
KEGG_PATHWAY	mmu04916:Melanogenesis	10	1.64474	0.0016157	A, WNT10B, WNT11, WNT3A, WNT5A, LEF1, ADCY2, FZD10, PLCB1, ADCY5	247	100	8992	3.64049	0.313921	0.0163678	0.0140496
KEGG_PATHWAY	mmu04261:Adrenergic signaling in cardiomyocytes	12	1.97368	0.00298153	RYR2, CACNA2D3, ATP2B4, ADCY2, CACNA1C, AGTR2, PLCB1, ADRA1B, CACNG4, SLC8A1, ADCY5, CREB5	247	152	8992	2.87407	0.501292	0.0289457	0.0248461
KEGG_PATHWAY	mmu04921:Oxytocin signaling pathway	12	1.97368	0.00313678	RYR2, KCNJ6, CACNA2D3, NFATC2, NFATC1, ADCY2, CACNA1C, PLCB1, EGFR, KCNJ2, CACNG4, ADCY5	247	153	8992	2.85528	0.519063	0.0292348	0.0250943
KEGG_PATHWAY	mmu05200:Pathways in cancer	27	4.44079	0.00369333	PTGER4, LAMA2, LAMA3, LEF1, ADCY2, FZD10, FGF2, EGFR, ADCY5, EDNRA, WNT11, GNG4, HEY2, PMAIP1, RUNX1T1, NCOA1, WNT10B, PDGFRA, CDKN2B, TGFB2, GADD45B, WNT3A, MMP2, WNT5A, BMP2, PLCB1, GSTM7	247	543	8992	1.81019	0.577742	0.0330979	0.0284102
KEGG_PATHWAY	mmu04360:Axon guidance	13	2.13816	0.00402234	ROBO2, SEMA5A, NTNG1, EPHA8, WNT5A, NFATC2, SEMA4F, UNC5C, UNC5D, GDF7, EFNA3, BOC, EPHA3	247	181	8992	2.61471	0.609018	0.0347113	0.0297951
KEGG_PATHWAY	mmu04925:Aldosterone synthesis and secretion	9	1.48026	0.00672222	HSD3B6, KCNK9, ATP2B4, ADCY2, CACNA1C, PLCB1, ADCY5, CACNA1G, CREB5	247	102	8992	3.21219	0.79228	0.054448	0.0467365
KEGG_PATHWAY	mmu04611:Platelet activation	10	1.64474	0.00685328	COL1A1, COL3A1, COL1A2, TBXAS1, PRKG2, GP1BA, ADCY2, GP6, PLCB1, ADCY5	247	124	8992	2.93588	0.798569	0.054448	0.0467365
KEGG_PATHWAY	mmu05224:Breast cancer	11	1.80921	0.00701047	NCOA1, WNT10B, WNT11, GADD45B, WNT3A, WNT5A, LEF1, HEY2, FZD10, FGF2, EGFR	247	147	8992	2.72417	0.805863	0.054448	0.0467365
KEGG_PATHWAY	mmu04723:Retrograde endocannabinoid signaling	11	1.80921	0.00734303	GRIA1, GRIA2, GABRP, GABRA1, KCNJ6, GNG4, SLC17A6, ADCY2, CACNA1C, PLCB1, ADCY5	247	148	8992	2.70577	0.820439	0.0551911	0.0473744
KEGG_PATHWAY	mmu05226:Gastric cancer	11	1.80921	0.00804467	WNT10B, TGFB2, CDKN2B, WNT11, GADD45B, WNT3A, WNT5A, LEF1, FZD10, FGF2, EGFR	247	150	8992	2.66969	0.847713	0.0585753	0.0502792
KEGG_PATHWAY	mmu04926:Relaxin signaling pathway	10	1.64474	0.00880379	COL1A1, COL3A1, COL1A2, GNG4, MMP2, ADCY2, PLCB1, EGFR, ADCY5, CREB5	247	129	8992	2.82208	0.872593	0.0621601	0.0533563
KEGG_PATHWAY	mmu04727:GABAergic synapse	8	1.31579	0.0108162	GABRP, GABRA1, KCNJ6, GNG4, PLCL1, ADCY2, CACNA1C, ADCY5	247	89	8992	3.27235	0.920651	0.0741226	0.0636245
KEGG_PATHWAY	mmu04725:Cholinergic synapse	9	1.48026	0.0115605	SLC5A7, KCNJ6, GNG4, ADCY2, CACNA1C, PLCB1, KCNJ2, ADCY5, CREB5	247	112	8992	2.92539	0.933416	0.0769598	0.0660599
KEGG_PATHWAY	mmu04724:Glutamatergic synapse	9	1.48026	0.0121569	GRIA1, GRIA2, GRM7, GNG4, SLC17A6, ADCY2, CACNA1C, PLCB1, ADCY5	247	113	8992	2.8995	0.94215	0.0786819	0.0675381
KEGG_PATHWAY	mmu04927:Cortisol synthesis and secretion	7	1.15132	0.0136836	HSD3B6, ADCY2, CACNA1C, PLCB1, ADCY5, CACNA1G, CREB5	247	72	8992	3.53936	0.959655	0.0861696	0.0739653
KEGG_PATHWAY	mmu04550:Signaling pathways regulating pluripotency of stem cells	10	1.64474	0.0145497	WNT10B, ZFHX3, WNT11, WNT3A, WNT5A, SMAD9, INHBA, FZD10, KLF4, FGF2	247	140	8992	2.60035	0.967123	0.0892126	0.0765774
KEGG_PATHWAY	mmu04933:AGE-RAGE signaling pathway in diabetic complications	8	1.31579	0.0205395	COL1A1, TGFB2, COL3A1, VCAM1, COL1A2, MMP2, NFATC1, PLCB1	247	101	8992	2.88355	0.992058	0.12271	0.105331
KEGG_PATHWAY	mmu05033:Nicotine addiction	5	0.822368	0.0231053	GRIA1, GRIA2, GABRP, GABRA1, SLC17A6	247	40	8992	4.55061	0.99569	0.134589	0.115527
KEGG_PATHWAY	mmu05146:Amoebiasis	8	1.31579	0.0271764	COL1A1, TGFB2, COL3A1, COL1A2, LAMA2, IL1R1, LAMA3, PLCB1	247	107	8992	2.72186	0.998371	0.153749	0.131974
KEGG_PATHWAY	mmu04928:Parathyroid hormone synthesis, secretion and action	8	1.31579	0.0284092	ADCY2, PTH1R, PLCB1, EGFR, RUNX2, PTHLH, ADCY5, CREB5	247	108	8992	2.69666	0.998788	0.153749	0.131974
KEGG_PATHWAY	mmu04970:Salivary secretion	7	1.15132	0.0286483	TRPV6, ATP2B4, PRKG2, ADCY2, PLCB1, ADRA1B, ADCY5	247	85	8992	2.99805	0.998855	0.153749	0.131974
KEGG_PATHWAY	mmu04911:Insulin secretion	7	1.15132	0.0301194	RYR2, KCNMB2, ADCY2, CACNA1C, PLCB1, ADCY5, CREB5	247	86	8992	2.96319	0.999196	0.153749	0.131974
KEGG_PATHWAY	mmu04540:Gap junction	7	1.15132	0.0301194	PDGFRA, TUBB1, PRKG2, ADCY2, PLCB1, EGFR, ADCY5	247	86	8992	2.96319	0.999196	0.153749	0.131974
KEGG_PATHWAY	mmu04915:Estrogen signaling pathway	9	1.48026	0.0305233	NCOA1, KCNJ6, KRT15, MMP2, ADCY2, PLCB1, EGFR, ADCY5, CREB5	247	134	8992	2.4451	0.99927	0.153749	0.131974
KEGG_PATHWAY	mmu04010:MAPK signaling pathway	15	2.46711	0.0310138	PDGFRA, PTPRR, TGFB2, GADD45B, IL1R1, CACNA2D3, NFATC1, CACNA1C, NGF, FGF2, EGFR, CACNA1G, EFNA3, MRAS, CACNG4	247	294	8992	1.85739	0.999351	0.153749	0.131974
KEGG_PATHWAY	mmu04270:Vascular smooth muscle contraction	9	1.48026	0.0438435	EDNRA, KCNMB2, PRKCQ, ADCY2, CACNA1C, AVPR1A, PLCB1, ADRA1B, ADCY5	247	144	8992	2.2753	0.999971	0.212823	0.182681
KEGG_PATHWAY	mmu04061:Viral protein interaction with cytokine and cytokine receptor	7	1.15132	0.0456049	GM10591, IL18RAP, IL10RB, TNFRSF14, PPBP, CXCL14, PF4	247	95	8992	2.68246	0.999981	0.216856	0.186142
KEGG_PATHWAY	mmu05163:Human cytomegalovirus infection	13	2.13816	0.0488109	PTGER4, PDGFRA, IL1R1, IL10RB, NFATC2, TAP1, NFATC1, ADCY2, EGFR, ADCY5, GNG4, PLCB1, CREB5	247	256	8992	1.84868	0.999991	0.225334	0.19342
KEGG_PATHWAY	mmu05225:Hepatocellular carcinoma	10	1.64474	0.0493221	WNT10B, TGFB2, WNT11, GADD45B, WNT3A, WNT5A, LEF1, FZD10, GSTM7, EGFR	247	174	8992	2.09223	0.999992	0.225334	0.19342
KEGG_PATHWAY	mmu04072:Phospholipase D signaling pathway	9	1.48026	0.0517532	DNM3, PDGFRA, MRAS, GRM7, ADCY2, AVPR1A, PLCB1, EGFR, ADCY5	247	149	8992	2.19895	0.999996	0.231894	0.199051
KEGG_PATHWAY	mmu04978:Mineral absorption	5	0.822368	0.0596657	TRPV6, SLC40A1, ATP2B4, CYBRD1, SLC8A1	247	54	8992	3.37082	0.999999	0.262304	0.225154
KEGG_PATHWAY	mmu04514:Cell adhesion molecules	10	1.64474	0.0620909	NLGN3, NTNG1, VCAM1, ALCAM, NRXN1, SLITRK3, SLITRK6, ITGA8, NCAM1, ICOS	247	182	8992	2.00027	1	0.267911	0.229966
KEGG_PATHWAY	mmu04923:Regulation of lipolysis in adipocytes	5	0.822368	0.0664818	ADORA1, NPY1R, PRKG2, ADCY2, ADCY5	247	56	8992	3.25043	1	0.281349	0.241501
KEGG_PATHWAY	mmu04726:Serotonergic synapse	8	1.31579	0.06777	KCNJ6, HTR6, GNG4, HTR1B, ALOX12B, CACNA1C, PLCB1, ADCY5	247	131	8992	2.2232	1	0.281349	0.241501
KEGG_PATHWAY	mmu04015:Rap1 signaling pathway	11	1.80921	0.06909	PDGFRA, EFNA3, MRAS, MAGI2, ADCY2, NGF, PLCB1, SIPA1L2, FGF2, EGFR, ADCY5	247	214	8992	1.87128	1	0.281349	0.241501
KEGG_PATHWAY	mmu05144:Malaria	5	0.822368	0.0700354	TGFB2, VCAM1, HBB-BT, HBB-BS, THBS2	247	57	8992	3.19341	1	0.281349	0.241501
KEGG_PATHWAY	mmu05340:Primary immunodeficiency	4	0.657895	0.0745882	BLNK, TAP1, ICOS, RAG1	247	36	8992	4.04498	1	0.29456	0.252841
KEGG_PATHWAY	mmu04728:Dopaminergic synapse	8	1.31579	0.0768817	GRIA1, GRIA2, KCNJ6, GNG4, CACNA1C, PLCB1, ADCY5, CREB5	247	135	8992	2.15732	1	0.298557	0.256272
KEGG_PATHWAY	mmu04961:Endocrine and other factor-regulated calcium reabsorption	5	0.822368	0.0851974	DNM3, ATP2B4, PTH1R, PLCB1, SLC8A1	247	61	8992	2.984	1	0.325426	0.279336
KEGG_PATHWAY	mmu05143:African trypanosomiasis	4	0.657895	0.0900473	VCAM1, HBB-BT, HBB-BS, PLCB1	247	39	8992	3.73383	1	0.338404	0.290475
KEGG_PATHWAY	mmu04935:Growth hormone synthesis, secretion and action	7	1.15132	0.0982093	GHR, ADCY2, CACNA1C, PLCB1, SSTR5, ADCY5, CREB5	247	116	8992	2.19684	1	0.363219	0.311776

## Sheet: groupE12 5vsgroupE10 5_deg_down
Category	Term	Count	%	PValue	Genes	List Total	Pop Hits	Pop Total	Fold Enrichment	Bonferroni	Benjamini	FDR
KEGG_PATHWAY	mmu04550:Signaling pathways regulating pluripotency of stem cells	15	1.80941	7.92381e-05	FZD5, FZD4, FZD8, WNT8B, PAX6, DUSP9, ISL1, ACVR2B, MAPK12, SOX2, ZIC3, HAND1, HESX1, LHX5, BMPR1B	272	140	8992	3.54202	0.0222532	0.0225036	0.0220282
KEGG_PATHWAY	mmu00010:Glycolysis / Gluconeogenesis	9	1.08565	0.000857174	LDHA, PKM, PKLR, ENO1B, ENO1, ENO3, GAPDH, ENO4, HK2	272	67	8992	4.44074	0.216153	0.121719	0.119147
KEGG_PATHWAY	mmu05224:Breast cancer	13	1.56815	0.00158574	SHC3, FZD5, FZD4, FZD8, WNT8B, DLL1, DLL3, FGF15, FGF8, CCND1, KIT, PGR, HES5	272	147	8992	2.92357	0.362823	0.142779	0.139762
KEGG_PATHWAY	mmu04066:HIF-1 signaling pathway	11	1.3269	0.00226052	LDHA, TFRC, EPO, PRKCB, ENO1B, PLCG2, ENO1, ENO3, GAPDH, ENO4, HK2	272	114	8992	3.18989	0.474137	0.142779	0.139762
KEGG_PATHWAY	mmu01230:Biosynthesis of amino acids	9	1.08565	0.00251371	PKM, PKLR, PSAT1, ENO1B, ENO1, BCAT1, ENO3, GAPDH, ENO4	272	79	8992	3.7662	0.510706	0.142779	0.139762
KEGG_PATHWAY	mmu01200:Carbon metabolism	11	1.3269	0.00349741	PKM, PKLR, PSAT1, GLDC, ENO1B, AMT, ENO1, ENO3, GAPDH, ENO4, HK2	272	121	8992	3.00535	0.630278	0.165544	0.162047
KEGG_PATHWAY	mmu04727:GABAergic synapse	9	1.08565	0.00525959	SLC38A1, SLC32A1, PRKCB, SLC6A13, GAD2, SLC6A11, SLC38A3, SLC6A1, SLC38A5	272	89	8992	3.34303	0.776348	0.213389	0.208881
KEGG_PATHWAY	mmu04510:Focal adhesion	14	1.68878	0.00774068	SHC3, LAMA1, ITGA3, PRKCB, VEGFD, PARVB, VAV2, VTN, MYL7, IBSP, CCND1, ITGB8, PIP5K1B, PAK3	272	201	8992	2.3026	0.88996	0.232812	0.227894
KEGG_PATHWAY	mmu04390:Hippo signaling pathway	12	1.44753	0.00781331	SOX2, CRB2, CRB1, PARD6B, CCND1, FZD5, PPP2R2C, FZD4, FZD8, WNT8B, BMPR1B, LLGL2	272	157	8992	2.52679	0.892223	0.232812	0.227894
KEGG_PATHWAY	mmu04950:Maturity onset diabetes of the young	5	0.603136	0.00819761	PKLR, PAX6, NKX6-1, FOXA2, NKX2-2	272	27	8992	6.122	0.903452	0.232812	0.227894
KEGG_PATHWAY	mmu05165:Human papillomavirus infection	20	2.41255	0.0131252	FZD5, LAMA1, ITGA3, FZD4, H2-Q6, H2-Q7, H2-K1, FZD8, WNT8B, VTN, PARD6B, PKM, PPP2R2C, IBSP, CCND1, CCNE1, ITGB8, ATM, HES5, LLGL2	272	362	8992	1.82645	0.976535	0.338868	0.331709
KEGG_PATHWAY	mmu05226:Gastric cancer	11	1.3269	0.015166	SHH, FGF15, SHC3, FGF8, CCND1, FZD5, FZD4, CCNE1, FZD8, RARB, WNT8B	272	150	8992	2.42431	0.986965	0.358929	0.351346
KEGG_PATHWAY	mmu05230:Central carbon metabolism in cancer	7	0.844391	0.0174005	RET, LDHA, PKM, KIT, SLC1A5, SLC16A3, HK2	272	69	8992	3.35379	0.993162	0.380133	0.372102
KEGG_PATHWAY	mmu05205:Proteoglycans in cancer	13	1.56815	0.0212696	FZD5, FZD4, PRKCB, FZD8, WNT8B, ANK1, MAPK12, VAV2, VTN, SHH, CCND1, ERBB4, PLCG2	272	205	8992	2.09641	0.99777	0.422027	0.41311
KEGG_PATHWAY	mmu05200:Pathways in cancer	26	3.13631	0.0222901	RET, LAMA1, EPO, WNT8B, CSF2RB, DLL1, DLL3, SHH, FGF8, CCND1, PLCG2, HES5, HSP90AA1, FZD5, ITGA3, FZD4, TXNRD2, PRKCB, ZBTB16, FZD8, VEGFD, MITF, FGF15, CCNE1, KIT, RARB	272	543	8992	1.58293	0.998342	0.422027	0.41311
KEGG_PATHWAY	mmu03013:Nucleocytoplasmic transport	9	1.08565	0.0259685	IPO11, NUP205, DDX19B, NUP210, CSE1L, RANBP17, TNPO1, NUP160, IPO5	272	118	8992	2.52144	0.999432	0.456001	0.446367
KEGG_PATHWAY	mmu04964:Proximal tubule bicarbonate reclamation	4	0.482509	0.0272958	ATP1A3, SLC38A3, SLC4A4, CAR4	272	22	8992	6.0107	0.999614	0.456001	0.446367
KEGG_PATHWAY	mmu00250:Alanine, aspartate and glutamate metabolism	5	0.603136	0.0290291	PPAT, CAD, GAD2, NAT8L, RIMKLA	272	39	8992	4.23831	0.999767	0.458015	0.448338
KEGG_PATHWAY	mmu01100:Metabolic pathways	62	7.47889	0.0330076	MOGAT2, GLDC, ENO1B, QPRT, ENO1, PIK3C2A, ENO3, HK2, ENO4, KYNU, PPAT, NAMPT, DNMT3B, CAR14, GGT1, LBR, CAR4, GUCY1A2, PTGIS, PLA2G4C, CAD, AMT, DHDH, ACSL4, CMBL, CYP27A1, ALDH1A3, CYP26C1, PKM, ALDH1A1, ACSBG1, BCAT1, NAT8L, DGKK, GAPDH, GART, IDI1, PLA2G3, AK4, FUT4, MTMR7, HSD11B2, LDHA, MTHFD1L, FUT9, AWAT2, PLCG2, PIP5K1B, CKB, RIMKLA, FDPS, RRM2, PKLR, GAD2, DHCR24, CYP26A1, VNN1, TH, PSAT…	272	1620	8992	1.26521	0.999928	0.493377	0.482953
KEGG_PATHWAY	mmu04218:Cellular senescence	11	1.3269	0.0514966	CCND1, CCNE1, CHEK2, H2-Q6, H2-Q7, H2-K1, HUS1, ATM, E2F5, MAPK12, HIPK2	272	184	8992	1.97634	1	0.731251	0.715803
KEGG_PATHWAY	mmu04940:Type I diabetes mellitus	6	0.723764	0.0594551	PTPRN2, H2-Q6, H2-Q7, H2-K1, GAD2, HSPD1	272	70	8992	2.83361	1	0.775675	0.759288
KEGG_PATHWAY	mmu04670:Leukocyte transendothelial migration	8	0.965018	0.0654339	CLDN6, CLDN10, MYL7, PRKCB, PLCG2, MAPK12, JAM2, VAV2	272	118	8992	2.24128	1	0.775675	0.759288
KEGG_PATHWAY	mmu04115:p53 signaling pathway	6	0.723764	0.06555	RRM2, CCND1, CCNE1, CHEK2, ADGRB1, ATM	272	72	8992	2.7549	1	0.775675	0.759288
KEGG_PATHWAY	mmu05223:Non-small cell lung cancer	6	0.723764	0.06555	RET, CCND1, KIF5C, PRKCB, PLCG2, RARB	272	72	8992	2.7549	1	0.775675	0.759288
KEGG_PATHWAY	mmu04978:Mineral absorption	5	0.603136	0.079068	ATP7B, ATP1A3, MT2, MT1, ATP2B1	272	54	8992	3.061	1	0.88566	0.866949
KEGG_PATHWAY	mmu04916:Melanogenesis	7	0.844391	0.0810815	FZD5, FZD4, PRKCB, KIT, FZD8, WNT8B, MITF	272	100	8992	2.31412	1	0.88566	0.866949
KEGG_PATHWAY	mmu04514:Cell adhesion molecules	10	1.20627	0.0989551	CLDN6, CLDN10, CNTNAP2, H2-Q6, H2-Q7, H2-K1, NRXN3, ITGB8, NRCAM, JAM2	272	182	8992	1.81642	1	0.952198	0.932081

## Sheet: groupE12 5vsgroupE10 5_deg_up
Category	Term	Count	%	PValue	Genes	List Total	Pop Hits	Pop Total	Fold Enrichment	Bonferroni	Benjamini	FDR
KEGG_PATHWAY	mmu04974:Protein digestion and absorption	29	1.88557	3.23057e-10	COL17A1, COL16A1, COL14A1, ELN, COL11A2, COL12A1, SLC1A1, ATP1A2, CPA3, COL26A1, COL27A1, MME, COL25A1, COL1A1, COL3A1, COL1A2, COL5A1, XPNPEP2, FXYD2, COL6A2, COL7A1, COL5A2, COL6A1, COL8A2, COL6A3, COL8A1, COL6A6, COL9A3, COL9A2	608	108	8992	3.97125	9.91785e-08	8.11801e-08	6.6372e-08
KEGG_PATHWAY	mmu04080:Neuroactive ligand-receptor interaction	61	3.96619	6.0561e-10	GABRB1, OXTR, THRB, CHRM1, THRA, NPY2R, GRIK1, PTH1R, HTR2A, ADRA1B, NR3C1, RXFP1, RXFP3, GHR, MC4R, EDNRA, GRM7, GRM8, ADORA1, BDKRB2, LEPR, PTGDR, PTGIR, TACR3, AVPR1A, SSTR2, GABRG3, ADRA2A, AGTR1A, SSTR5, ADCYAP1, GAL, AGTR2, PTGER4, GRIA2, CALCA, GRP, CHRNA5, NPY4R, PTGER2, PTGER3, ADRB1, ADRB2, NTS, GRIN2A, NPY, PENK, S1PR3, TAC1, GABRA2, GABRA1, GABRP, GABBR2, GABRA4, HTR1A, HTR1B, GRIN2B,…	608	386	8992	2.3372	1.85922e-07	8.11801e-08	6.6372e-08
KEGG_PATHWAY	mmu04022:cGMP-PKG signaling pathway	37	2.40572	7.93291e-10	GUCY1B1, NPR2, CALML3, ADRB1, ATP1A2, ADCY2, CACNA1C, CALML4, ADRB2, ADRA1B, ADCY8, MYLK3, ADCY5, PPP3CA, EDNRA, PPP3CC, CREB3L1, CREB3L2, KCNMB2, ADORA1, BDKRB2, PRKG2, KCNMB4, MEF2C, GUCY1A1, ATP2B4, NFATC2, NFATC1, AGTR1A, ADRA2A, NFATC4, KCNU1, FXYD2, KCNMA1, PDE3A, MYL9, CNGB1	608	173	8992	3.16307	2.4354e-07	8.11801e-08	6.6372e-08
KEGG_PATHWAY	mmu04024:cAMP signaling pathway	42	2.73082	1.76501e-09	GRIA2, RYR2, OXTR, CHRM1, HHIP, PTGER2, PTGER3, CALML3, ADRB1, ATP1A2, ADCY2, CACNA1C, CALML4, ADRB2, ADCY8, ADCY5, GRIN2A, EDNRA, NPY, CREB3L1, CREB3L2, PDE4B, ADORA1, RAC3, GABBR2, ATP2B4, HTR1A, HTR1B, NFATC1, SSTR2, GRIN2B, SSTR5, NFKBIA, ADCYAP1, SST, FXYD2, PPP1R1B, FXYD1, PDE3A, MYL9, CFTR, CNGB1	608	220	8992	2.82344	5.41857e-07	1.35464e-07	1.10754e-07
KEGG_PATHWAY	mmu04512:ECM-receptor interaction	24	1.56047	1.06076e-08	LAMA2, SDC4, ITGB4, LAMC3, LAMA4, ITGA2, LAMA3, TNC, THBS2, COL1A1, COL1A2, RELN, SV2A, TNN, COL6A2, COL6A1, ITGA11, ITGA8, COL6A3, COL6A6, COL9A3, ITGB6, COL9A2, CD44	608	88	8992	4.03349	3.25653e-06	6.51307e-07	5.32502e-07
KEGG_PATHWAY	mmu04924:Renin secretion	22	1.43043	1.59129e-08	PTGER4, GUCY1A1, GUCY1B1, PDE1A, PTGER2, ADRB1, CALML3, CACNA1C, ADRB2, CALML4, AGTR1A, ADCY5, AQP1, PPP3CA, ADCYAP1, EDNRA, PPP3CC, KCNMA1, PDE3A, ADORA1, PRKG2, KCNJ2	608	76	8992	4.28116	4.88526e-06	8.14212e-07	6.65691e-07
KEGG_PATHWAY	mmu04310:Wnt signaling pathway	33	2.14564	1.00988e-07	LEF1, FZD10, PRICKLE1, APCDD1, NKD1, NKD2, PPP3CA, WNT11, PPP3CC, WIF1, RSPO2, RAC3, RSPO3, WNT4, WNT10B, WNT10A, TLE2, WNT3A, WNT5A, FZD9, NFATC2, NFATC1, PRKCA, WNT9A, WNT16, DKK1, DKK2, TLE6, NFATC4, DKK4, DAAM2, NOTUM, LGR6	608	171	8992	2.85411	3.10027e-05	4.42903e-06	3.62113e-06
KEGG_PATHWAY	mmu04020:Calcium signaling pathway	39	2.53576	6.06093e-07	RYR2, OXTR, CHRM1, PDE1A, PTGER3, CALML3, ADRB1, ADCY2, CACNA1C, HTR2A, CALML4, ADRB2, MST1R, ADRA1B, ADCY8, FGF2, EGFR, MYLK3, CACNA1G, PPP3CA, GRIN2A, FGF7, EDNRA, PPP3CC, FGF20, BDKRB2, PDGFRA, NTRK2, SPHK1, ATP2B4, TACR3, PRKCA, AVPR1A, NGF, AGTR1A, P2RX7, ORAI2, CAMK1, FGFR4	608	240	8992	2.40329	0.000186053	2.32588e-05	1.90162e-05
KEGG_PATHWAY	mmu05200:Pathways in cancer	67	4.35631	1.50913e-06	FLT3, LAMC3, HHIP, CALML3, FZD10, CALML4, FGF2, EDNRA, FGF7, HEY2, BDKRB2, RAC3, NCOA1, PDGFRA, ITGA2, MMP2, WNT5A, PRKCA, WNT9A, WNT16, MMP9, AGTR1A, TGFBR2, RUNX1, AR, TRAF5, PTGER4, CEBPA, LAMA2, LAMA4, PTGER2, LAMA3, PTGER3, LEF1, GSTT1, ADCY2, ADCY8, EGFR, ADCY5, WNT11, GNG4, GNG7, FGF20, CTNNA2, RXRG, WNT4, RUNX1T1, WNT10B, WNT10A, GSTM2, TGFB2, GSTM1, JAG1, GADD45B, WNT3A, TGFB3, STAT1, PT…	608	543	8992	1.82485	0.000463197	5.14782e-05	4.2088e-05
KEGG_PATHWAY	mmu04151:PI3K-Akt signaling pathway	48	3.12094	7.56845e-06	CHRM1, LAMA2, ITGB4, FLT3, LAMC3, LAMA4, LAMA3, TNC, THBS2, FGF2, EGFR, GHR, FGF7, RELN, GNG4, TNN, GNG7, CREB3L1, CREB3L2, NTF3, FGF20, ITGB6, PDGFRA, NTRK2, ANGPT1, ITGA2, MAGI2, PRKCA, NGF, GNG11, RBL2, EFNA1, COL1A1, EFNA3, COL1A2, PPP2R2B, COL6A2, COL6A1, IL2RB, DDIT4, ITGA11, ITGA8, COL6A3, COL6A6, COL9A3, COL9A2, SGK1, FGFR4	608	359	8992	1.97742	0.00232082	0.000220436	0.000180226
KEGG_PATHWAY	mmu05032:Morphine addiction	20	1.30039	7.89835e-06	GABRA2, GABRP, GABBR2, GABRA1, GABRB1, PDE1A, GABRA4, PRKCA, ADCY2, ADCY8, GABRG3, GNG11, ADCY5, GNG4, GNG7, PDE4B, PDE3A, ADORA1, PDE7B, KCNJ3	608	91	8992	3.25043	0.00242187	0.000220436	0.000180226
KEGG_PATHWAY	mmu04921:Oxytocin signaling pathway	27	1.75553	1.01909e-05	RYR2, OXTR, GUCY1B1, NPR2, CALML3, ADCY2, CACNA1C, CALML4, ADCY8, EGFR, MYLK3, ADCY5, PPP3CA, PPP3CC, KCNJ2, CACNG4, KCNJ3, MEF2C, GUCY1A1, CACNA2D1, CACNA2D3, NFATC2, NFATC1, PRKCA, NFATC4, CAMK1, MYL9	608	153	8992	2.60991	0.00312372	0.000260716	0.000213159
KEGG_PATHWAY	mmu05414:Dilated cardiomyopathy	20	1.30039	1.29493e-05	RYR2, TGFB2, LAMA2, ITGB4, TGFB3, CACNA2D1, ITGA2, TPM2, TPM1, CACNA2D3, ADRB1, ADCY2, CACNA1C, ADCY8, ADCY5, LMNA, ITGA11, ITGA8, ITGB6, CACNG4	608	94	8992	3.1467	0.00396757	0.000305803	0.000250021
KEGG_PATHWAY	mmu05205:Proteoglycans in cancer	32	2.08062	1.7237e-05	HPSE2, SDC4, SDC2, TWIST2, FZD10, FGF2, EGFR, WNT11, FLNC, WNT4, WNT10B, WNT10A, TGFB2, WNT3A, CAV2, LUM, ITGA2, CAV1, MMP2, WNT5A, FZD9, PRKCA, WNT9A, WNT16, MMP9, DCN, COL1A1, COL1A2, MRAS, FAS, HPSE, CD44	608	205	8992	2.3086	0.00527783	0.000377983	0.000309035
KEGG_PATHWAY	mmu05165:Human papillomavirus infection	47	3.05592	2.06937e-05	PTGER4, H2-T23, H2-T22, LAMA2, ITGB4, LAMC3, LAMA4, LAMA3, TNC, FZD10, THBS2, EGFR, WNT11, RELN, TNN, CREB3L1, CREB3L2, HEY2, ITGB6, OASL1, WNT4, OASL2, WNT10B, WNT10A, JAG1, WNT3A, STAT1, ITGA2, WNT5A, FZD9, WNT9A, TUBG2, WNT16, RBL2, COL1A1, COL1A2, DLG2, PPP2R2B, COL6A2, COL6A1, ITGA11, ITGA8, FAS, COL6A3, COL6A6, COL9A3, COL9A2	608	362	8992	1.92018	0.00633291	0.000423532	0.000346275
KEGG_PATHWAY	mmu04713:Circadian entrainment	20	1.30039	2.41277e-05	GRIA2, RYR2, GUCY1A1, GUCY1B1, CALML3, PRKCA, ADCY2, CACNA1C, CALML4, ADCY8, GNG11, GRIN2B, ADCY5, CACNA1G, ADCYAP1, GRIN2A, GNG4, GNG7, PRKG2, KCNJ3	608	98	8992	3.01826	0.00737994	0.000462951	0.000378504
KEGG_PATHWAY	mmu04916:Melanogenesis	20	1.30039	3.24533e-05	WNT10B, A, WNT10A, WNT3A, LEF1, WNT5A, FZD9, CALML3, PRKCA, ADCY2, FZD10, CALML4, WNT9A, WNT16, ADCY8, ADCY5, WNT11, CREB3L1, CREB3L2, WNT4	608	100	8992	2.95789	0.00991384	0.000586068	0.000479163
KEGG_PATHWAY	mmu05217:Basal cell carcinoma	15	0.975293	5.96766e-05	WNT10B, WNT10A, GADD45B, WNT3A, HHIP, PTCH2, LEF1, WNT5A, FZD9, FZD10, WNT9A, WNT16, BMP2, WNT11, WNT4	608	63	8992	3.5213	0.0181544	0.00101782	0.000832156
KEGG_PATHWAY	mmu04510:Focal adhesion	30	1.95059	7.71783e-05	LAMA2, ITGB4, LAMC3, LAMA4, LAMA3, TNC, THBS2, EGFR, MYLK3, RELN, TNN, RAC3, ITGB6, FLNC, PDGFRA, CAV2, ITGA2, CAV1, PRKCA, COL1A1, COL1A2, COL6A2, COL6A1, ITGA11, ITGA8, COL6A3, COL6A6, COL9A3, COL9A2, MYL9	608	201	8992	2.20738	0.0234161	0.00124704	0.00101957
KEGG_PATHWAY	mmu04270:Vascular smooth muscle contraction	24	1.56047	8.90726e-05	GUCY1A1, CALCA, PTGIR, GUCY1B1, NPR2, CALML3, PRKCA, ADCY2, CACNA1C, CALML4, AVPR1A, ADCY8, ADRA1B, AGTR1A, MYLK3, ADCY5, EDNRA, KCNU1, KCNMA1, KCNMB2, KCNMB4, PRKCQ, MYL9, RAMP1	608	144	8992	2.46491	0.026976	0.00136726	0.00111786
KEGG_PATHWAY	mmu04390:Hippo signaling pathway	25	1.62549	0.000127951	LEF1, FZD10, NKD1, NKD2, WNT11, CTNNA2, WNT4, WNT10B, WNT10A, TGFB2, WNT3A, TGFB3, WNT5A, FZD9, TRP73, WNT9A, WNT16, BMP6, GDF7, TGFBR2, BMP2, LATS2, DLG2, PPP2R2B, SNAI2	608	157	8992	2.35501	0.0385218	0.00187052	0.00152932
KEGG_PATHWAY	mmu04970:Salivary secretion	17	1.10533	0.000150866	GUCY1A1, GUCY1B1, ATP2B4, ADRB1, CALML3, ATP1A2, PRKCA, ADCY2, ADRB2, CALML4, ADCY8, ADRA1B, ADCY5, TRPV6, FXYD2, KCNMA1, PRKG2	608	85	8992	2.95789	0.0452629	0.00210526	0.00172124
KEGG_PATHWAY	mmu04010:MAPK signaling pathway	38	2.47074	0.000163531	PTPRR, FLT3, HSPB1, CACNA1C, IL1RAP, FGF2, EGFR, CACNA1G, RELB, RPS6KA4, PPP3CA, FGF7, DUSP10, PPP3CC, NTF3, FGF20, RAC3, FLNC, CACNG4, PDGFRA, NTRK2, MEF2C, TGFB2, ANGPT1, GADD45B, TGFB3, IL1R1, CACNA2D1, CACNA2D3, NFATC1, PRKCA, NGF, TGFBR2, EFNA1, EFNA3, MRAS, FAS, FGFR4	608	294	8992	1.91156	0.0489685	0.00218278	0.00178462
KEGG_PATHWAY	mmu04350:TGF-beta signaling pathway	18	1.17035	0.000180699	TGFB2, TGFB3, FST, NOG, CHRD, SMAD9, INHBA, LTBP1, BMP6, DCN, GDF7, TGFBR2, GREM1, GREM2, BMP2, FMOD, NBL1, FBN1	608	95	8992	2.80222	0.0539688	0.00222217	0.00181682
KEGG_PATHWAY	mmu04724:Glutamatergic synapse	20	1.30039	0.000180959	GRIA2, SLC1A1, GRIK1, PRKCA, ADCY2, CACNA1C, SLC1A6, ADCY8, GNG11, GRIN2B, ADCY5, PPP3CA, GRIN2A, PPP3CC, GRM7, GNG4, GNG7, GRM8, KCNJ3, SHANK1	608	113	8992	2.61761	0.0540441	0.00222217	0.00181682
KEGG_PATHWAY	mmu04360:Axon guidance	27	1.75553	0.000192675	SEMA5A, EPHB6, ROBO2, EFNB1, PPP3CA, PPP3CC, BOC, RAC3, SLIT3, LRRC4C, WNT4, SEMA6B, EPHA5, NTNG1, SEMA4A, EPHA8, WNT5A, NFATC2, SEMA4F, UNC5C, PRKCA, UNC5D, NFATC4, GDF7, EFNA1, EFNA3, MYL9	608	181	8992	2.20616	0.0574411	0.00227504	0.00186005
KEGG_PATHWAY	mmu04261:Adrenergic signaling in cardiomyocytes	24	1.56047	0.000205354	RYR2, CACNA2D1, TPM2, TPM1, CACNA2D3, ATP2B4, ADRB1, CALML3, ATP1A2, PRKCA, ADCY2, CACNA1C, ADRB2, CALML4, ADCY8, ADRA1B, AGTR1A, ADCY5, PPP2R2B, FXYD2, CREB3L1, CREB3L2, AGTR2, CACNG4	608	152	8992	2.33518	0.0611037	0.00229641	0.00187752
KEGG_PATHWAY	mmu04934:Cushing syndrome	25	1.62549	0.000209444	LEF1, KCNA4, ADCY2, CACNA1C, FZD10, AHR, ADCY8, EGFR, ADCY5, CACNA1G, WNT11, CREB3L1, CREB3L2, WNT4, HSD3B6, WNT10B, WNT10A, CDKN2C, WNT3A, WNT5A, FZD9, WNT9A, WNT16, AGTR1A, KCNK2	608	162	8992	2.28233	0.0622821	0.00229641	0.00187752
KEGG_PATHWAY	mmu04911:Insulin secretion	16	1.04031	0.000567869	RYR2, RAB3A, ATP1A2, PRKCA, ADCY2, CACNA1C, ADCY8, ADCY5, ADCYAP1, KCNU1, FXYD2, CREB3L1, CREB3L2, KCNMA1, KCNMB2, KCNMB4	608	86	8992	2.75153	0.160027	0.00601158	0.00491501
KEGG_PATHWAY	mmu04727:GABAergic synapse	16	1.04031	0.000824292	GABRA2, GABRP, GABBR2, GABRA1, GABRB1, PLCL1, GABRA4, PRKCA, ADCY2, CACNA1C, ADCY8, GABRG3, GNG11, ADCY5, GNG4, GNG7	608	89	8992	2.65878	0.223658	0.00843526	0.00689658
KEGG_PATHWAY	mmu05410:Hypertrophic cardiomyopathy	16	1.04031	0.00104494	RYR2, TGFB2, LAMA2, ITGB4, TGFB3, CACNA2D1, ITGA2, TPM2, TPM1, CACNA2D3, CACNA1C, LMNA, ITGA11, ITGA8, ITGB6, CACNG4	608	91	8992	2.60035	0.274551	0.0103483	0.00846066
KEGG_PATHWAY	mmu04971:Gastric acid secretion	14	0.910273	0.00138088	CALML3, ATP1A2, PRKCA, ADCY2, CALML4, ADCY8, SSTR2, MYLK3, ADCY5, SST, SLC26A7, KCNK2, KCNJ2, CFTR	608	75	8992	2.7607	0.345721	0.0132478	0.0108313
KEGG_PATHWAY	mmu04659:Th17 cell differentiation	17	1.10533	0.00170594	STAT1, IL1R1, H2-DMA, RORC, NFATC2, NFATC1, AHR, IL1RAP, RUNX1, TGFBR2, NFKBIA, ZAP70, PPP3CA, PPP3CC, IL2RB, PRKCQ, RXRG	608	105	8992	2.39449	0.407954	0.0158704	0.0129755
KEGG_PATHWAY	mmu05412:Arrhythmogenic right ventricular cardiomyopathy	14	0.910273	0.00177036	RYR2, LAMA2, ITGB4, CACNA2D1, ITGA2, LEF1, CACNA2D3, CACNA1C, LMNA, ITGA11, ITGA8, CTNNA2, ITGB6, CACNG4	608	77	8992	2.689	0.419568	0.0159853	0.0130694
KEGG_PATHWAY	mmu05031:Amphetamine addiction	13	0.845254	0.00202562	GRIA2, CALML3, PRKCA, CACNA1C, CALML4, GRIN2B, ADCY5, PPP3CA, GRIN2A, PPP3CC, CREB3L1, CREB3L2, PPP1R1B	608	69	8992	2.78642	0.463396	0.0177676	0.0145266
KEGG_PATHWAY	mmu05163:Human cytomegalovirus infection	31	2.0156	0.0021049	PTGER4, H2-T23, H2-T22, PTGER2, PTGER3, CALML3, ADCY2, CALML4, ADCY8, EGFR, ADCY5, PPP3CA, PPP3CC, GNG4, GNG7, CREB3L1, CREB3L2, RAC3, PDGFRA, IL10RB, IL1R1, NFATC2, TAP1, NFATC1, PRKCA, GNG11, NFATC4, TAPBP, NFKBIA, TRAF5, FAS	608	256	8992	1.79091	0.476326	0.0179501	0.0146758
KEGG_PATHWAY	mmu04928:Parathyroid hormone synthesis, secretion and action	17	1.10533	0.00229805	KL, EGR1, MEF2C, PRKCA, ADCY2, PTH1R, ADCY8, RUNX2, EGFR, PTHLH, ADCY5, MMP14, MAFB, CREB3L1, CREB3L2, PDE4B, RXRG	608	108	8992	2.32797	0.50654	0.0190676	0.0155895
KEGG_PATHWAY	mmu04926:Relaxin signaling pathway	19	1.23537	0.00249953	MMP2, PRKCA, ADCY2, ADCY8, GNG11, MMP9, RXFP1, EGFR, ADCY5, RXFP3, TGFBR2, COL1A1, NFKBIA, COL3A1, COL1A2, GNG4, GNG7, CREB3L1, CREB3L2	608	129	8992	2.17829	0.536207	0.0201936	0.0165101
KEGG_PATHWAY	mmu05226:Gastric cancer	21	1.36541	0.0025666	WNT10B, WNT10A, TGFB2, GADD45B, WNT3A, TGFB3, LEF1, WNT5A, FZD9, FZD10, WNT9A, WNT16, FGF2, EGFR, TGFBR2, FGF7, WNT11, FGF20, CTNNA2, RXRG, WNT4	608	150	8992	2.07053	0.545682	0.0202037	0.0165183
KEGG_PATHWAY	mmu05225:Hepatocellular carcinoma	23	1.49545	0.00315422	WNT10B, WNT10A, GSTM2, TGFB2, GSTM1, GADD45B, WNT3A, TGFB3, LEF1, WNT5A, FZD9, GSTT1, PRKCA, FZD10, WNT9A, WNT16, SMARCA2, EGFR, TGFBR2, WNT11, GSTA3, GSTM7, WNT4	608	174	8992	1.95493	0.62087	0.0242086	0.0197927
KEGG_PATHWAY	mmu05033:Nicotine addiction	9	0.585176	0.00460613	GABRA2, GRIA2, GABRP, GABRA1, GABRB1, GRIN2A, GABRA4, GABRG3, GRIN2B	608	40	8992	3.32763	0.757645	0.0344898	0.0281985
KEGG_PATHWAY	mmu05207:Chemical carcinogenesis - receptor activation	27	1.75553	0.00487314	GSTT1, ADRB1, ADCY2, CACNA1C, ADRB2, AHR, ADCY8, FGF2, EGFR, ADCY5, FGF7, CREB3L1, CREB3L2, FGF20, RXRG, GSTM2, JAG1, GSTM1, PAQR7, EPHX2, EPHX1, PRKCA, KLF4, AR, BCL6, GSTA3, GSTM7	608	225	8992	1.77474	0.776805	0.0356203	0.0291228
KEGG_PATHWAY	mmu04514:Cell adhesion molecules	23	1.49545	0.00544365	NLGN3, NTNG1, H2-T23, NLGN1, CADM3, H2-T22, SDC4, NEGR1, SDC2, NRXN1, H2-DMA, CLDN1, PTPRD, ALCAM, MPZ, CLDN23, SLITRK3, ITGA8, MADCAM1, NCAM1, NCAM2, LRRC4C, LRRC4B	608	182	8992	1.869	0.812835	0.0388651	0.0317757
KEGG_PATHWAY	mmu04060:Cytokine-cytokine receptor interaction	32	2.08062	0.007867	CNTFR, CTF1, TNFRSF11B, IL1RAP, CXCL14, CXCL5, GHR, IL1RL2, LEPR, TNFRSF14, IL11RA1, GM10591, GDF10, TGFB2, IL10RB, TGFB3, IL1R1, INHBA, PPBP, NGF, BMP6, GDF7, TGFBR2, EDAR, BMP3, BMP2, CLCF1, IL2RB, FAS, ACKR3, IL17D, PF4	608	292	8992	1.62076	0.911497	0.0548902	0.0448777
KEGG_PATHWAY	mmu04925:Aldosterone synthesis and secretion	15	0.975293	0.00834336	HSD3B6, ATP2B4, CALML3, ATP1A2, PRKCA, ADCY2, CACNA1C, CALML4, ADCY8, AGTR1A, ADCY5, CACNA1G, CREB3L1, CREB3L2, CAMK1	608	102	8992	2.17492	0.923629	0.0569203	0.0465374
KEGG_PATHWAY	mmu04915:Estrogen signaling pathway	18	1.17035	0.00856516	NCOA1, GABBR2, MMP2, KRT23, CALML3, ADCY2, CALML4, KRT10, ADCY8, MMP9, EGFR, ADCY5, KRT17, KRT15, CREB3L1, CREB3L2, KRT14, KCNJ3	608	134	8992	1.98665	0.928698	0.0571632	0.046736
KEGG_PATHWAY	mmu04728:Dopaminergic synapse	18	1.17035	0.0092061	GRIA2, CALML3, PRKCA, CACNA1C, CALML4, GNG11, GRIN2B, ADCY5, PPP3CA, GRIN2A, PPP3CC, PPP2R2B, GNG4, GNG7, CREB3L1, CREB3L2, PPP1R1B, KCNJ3	608	135	8992	1.97193	0.941537	0.0601334	0.0491645
KEGG_PATHWAY	mmu05224:Breast cancer	19	1.23537	0.00993818	NCOA1, WNT10B, WNT10A, JAG1, GADD45B, WNT3A, LEF1, WNT5A, FZD9, FZD10, WNT9A, WNT16, FGF2, EGFR, FGF7, WNT11, HEY2, FGF20, WNT4	608	147	8992	1.91156	0.953406	0.0635629	0.0519684
KEGG_PATHWAY	mmu04371:Apelin signaling pathway	18	1.17035	0.0106027	EGR1, RYR2, MEF2C, JAG1, SPHK1, CALML3, ADCY2, CALML4, ADCY8, GNG11, AGTR1A, MYLK3, ADCY5, MAP1LC3A, MRAS, GNG4, GNG7, PPARGC1A	608	137	8992	1.94314	0.962085	0.0664291	0.0543117
KEGG_PATHWAY	mmu04750:Inflammatory mediator regulation of TRP channels	17	1.10533	0.0112689	PTGER4, IL1R1, PTGER2, CALML3, PRKCA, ADCY2, HTR2A, CALML4, IL1RAP, NGF, ADCY8, ADCY5, TRPV4, BDKRB2, F2RL1, PRKCQ, ASIC3	608	127	8992	1.97969	0.969168	0.069191	0.0565699
KEGG_PATHWAY	mmu05146:Amoebiasis	15	0.975293	0.0125358	SERPINB10, TGFB2, LAMA2, TGFB3, IL1R1, LAMC3, LAMA4, LAMA3, HSPB1, PRKCA, COL1A1, CD1D2, COL3A1, CD1D1, COL1A2	608	107	8992	2.07329	0.9792	0.0754603	0.0616956
KEGG_PATHWAY	mmu05143:African trypanosomiasis	8	0.520156	0.0142871	LAMA4, FAS, F2RL1, HBA-A2, HBB-BT, PRKCA, HBA-A1, HBB-BS	608	39	8992	3.03374	0.987939	0.0843489	0.0689628
KEGG_PATHWAY	mmu04014:Ras signaling pathway	26	1.69051	0.0155584	FLT3, CALML3, CALML4, FGF2, ETS2, EGFR, GRIN2A, FGF7, GNG4, GNG7, NTF3, FGF20, RAC3, PDGFRA, NTRK2, ANGPT1, PRKCA, NGF, GNG11, GRIN2B, EFNA1, ZAP70, EFNA3, MRAS, RASA4, FGFR4	608	235	8992	1.63628	0.991885	0.0901214	0.0736823
KEGG_PATHWAY	mmu04015:Rap1 signaling pathway	24	1.56047	0.0177284	PDGFRA, ANGPT1, MAGI2, CALML3, PRKCA, ADCY2, CALML4, NGF, ADCY8, SIPA1L2, GRIN2B, FGF2, RAP1GAP, EGFR, ADCY5, EFNA1, APBB1IP, FGF7, EFNA3, GRIN2A, MRAS, FGF20, RAC3, FGFR4	608	214	8992	1.65863	0.995878	0.0998022	0.0815972
KEGG_PATHWAY	mmu00230:Purine metabolism	17	1.10533	0.0181715	ENTPD4B, GUCY2E, ENTPD1, GUCY1A1, GUCY1B1, ENTPD3, PDE1A, NPR2, ADCY2, ADCY8, AK7, FHIT, PAPSS2, ADCY5, PDE4B, PDE3A, PDE7B	608	134	8992	1.87628	0.996411	0.0998022	0.0815972
KEGG_PATHWAY	mmu04725:Cholinergic synapse	15	0.975293	0.018205	CHRM1, PRKCA, ADCY2, CACNA1C, ADCY8, GNG11, ADCY5, SLC5A7, GNG4, GNG7, CREB3L1, CREB3L2, KCNQ5, KCNJ2, KCNJ3	608	112	8992	1.98073	0.996449	0.0998022	0.0815972
KEGG_PATHWAY	mmu04927:Cortisol synthesis and secretion	11	0.715215	0.0220521	HSD3B6, CREB3L1, CREB3L2, KCNA4, ADCY2, CACNA1C, ADCY8, KCNK2, AGTR1A, ADCY5, CACNA1G	608	72	8992	2.2595	0.998936	0.118772	0.0971067
KEGG_PATHWAY	mmu04380:Osteoclast differentiation	16	1.04031	0.0253058	TGFB2, STAT1, IL1R1, FHL2, NFATC2, NFATC1, TNFRSF11B, FOSL2, RELB, TGFBR2, NFKBIA, PPP3CA, PPP3CC, SOCS1, CTSK, BLNK	608	128	8992	1.84868	0.999618	0.133946	0.109513
KEGG_PATHWAY	mmu04918:Thyroid hormone synthesis	11	0.715215	0.0262144	TTR, FXYD2, CREB3L1, CREB3L2, GPX8, GPX7, ATP1A2, PRKCA, ADCY2, ADCY8, ADCY5	608	74	8992	2.19844	0.999713	0.134785	0.110199
KEGG_PATHWAY	mmu04550:Signaling pathways regulating pluripotency of stem cells	17	1.10533	0.0263423	WNT10B, WNT10A, HOXD1, WNT3A, WNT5A, FZD9, SMAD9, INHBA, FZD10, WNT9A, WNT16, KLF4, FGF2, WNT11, HOXA1, FGFR4, WNT4	608	140	8992	1.79586	0.999724	0.134785	0.110199
KEGG_PATHWAY	mmu05202:Transcriptional misregulation in cancer	24	1.56047	0.0285841	CEBPA, MEF2C, CDKN2C, BCL11B, GADD45B, HPGD, FLT3, IGFBP3, TMPRSS2, PAX3, WNT16, MMP9, MLF1, RUNX2, BAIAP3, RUNX1, TGFBR2, NR4A3, BCL6, TLX1, IL2RB, ERG, RXRG, RUNX1T1	608	224	8992	1.58459	0.999864	0.143858	0.117616
KEGG_PATHWAY	mmu04540:Gap junction	12	0.780234	0.0292898	PDGFRA, GUCY1A1, GUCY1B1, TUBB2A, PRKG2, ADRB1, PRKCA, ADCY2, HTR2A, ADCY8, EGFR, ADCY5	608	86	8992	2.06365	0.999891	0.145032	0.118577
KEGG_PATHWAY	mmu05166:Human T-cell leukemia virus 1 infection	26	1.69051	0.0307606	H2-T23, H2-T22, CRTC3, H2-DMA, ADCY2, ADCY8, ETS2, ADCY5, RELB, PPP3CA, ZFP36, PPP3CC, CREB3L1, CREB3L2, MSX1, EGR1, TGFB2, CDKN2C, TGFB3, IL1R1, NFATC2, NFATC1, NFATC4, TGFBR2, NFKBIA, IL2RB	608	250	8992	1.53811	0.999932	0.149897	0.122554
KEGG_PATHWAY	mmu04923:Regulation of lipolysis in adipocytes	9	0.585176	0.0331432	NPY, PTGER3, ADORA1, PRKG2, ADRB1, ADCY2, ADRB2, ADCY8, ADCY5	608	56	8992	2.37688	0.999968	0.158984	0.129983
KEGG_PATHWAY	mmu04658:Th1 and Th2 cell differentiation	12	0.780234	0.0339801	NFKBIA, ZAP70, PPP3CA, JAG1, PPP3CC, STAT1, H2-DMA, IL2RB, NFATC2, NFATC1, PRKCQ, RUNX3	608	88	8992	2.01675	0.999975	0.160491	0.131216
KEGG_PATHWAY	mmu04720:Long-term potentiation	10	0.650195	0.0351405	GRIA2, PPP3CA, GRIN2A, PPP3CC, CALML3, PRKCA, CACNA1C, CALML4, ADCY8, GRIN2B	608	67	8992	2.20738	0.999983	0.163456	0.13364
KEGG_PATHWAY	mmu05144:Malaria	9	0.585176	0.0363701	TGFB2, TGFB3, SDC2, HBA-A2, HBB-BT, HBA-A1, ACKR1, HBB-BS, THBS2	608	57	8992	2.33518	0.999989	0.166651	0.136252
KEGG_PATHWAY	mmu04611:Platelet activation	15	0.975293	0.039535	GUCY1A1, PTGIR, GUCY1B1, ITGA2, ADCY2, ADCY8, MYLK3, ADCY5, COL1A1, VAMP8, APBB1IP, COL3A1, COL1A2, TBXAS1, PRKG2	608	124	8992	1.78905	0.999996	0.178489	0.145931
KEGG_PATHWAY	mmu05418:Fluid shear stress and atherosclerosis	17	1.10533	0.0411535	MEF2C, GSTM2, GSTM1, SDC4, CAV2, IL1R1, CAV1, SDC2, MMP2, CALML3, GSTT1, CALML4, MMP9, GSTA3, TRPV4, RAC3, GSTM7	608	148	8992	1.69879	0.999998	0.183103	0.149703
KEGG_PATHWAY	mmu04935:Growth hormone synthesis, secretion and action	14	0.910273	0.0485237	STAT1, IGFBP3, PRKCA, ADCY2, CACNA1C, ADCY8, SSTR2, SSTR5, ADCY5, GHR, SOCS1, SST, CREB3L1, CREB3L2	608	116	8992	1.78494	1	0.212811	0.173992
KEGG_PATHWAY	mmu04961:Endocrine and other factor-regulated calcium reabsorption	9	0.585176	0.0513691	DNM3, KL, CALB1, FXYD2, BDKRB2, ATP2B4, ATP1A2, PRKCA, PTH1R	608	61	8992	2.18205	1	0.222117	0.181601
KEGG_PATHWAY	mmu00430:Taurine and hypotaurine metabolism	5	0.325098	0.0569432	GGT7, GADL1, FMO1, CDO1, FMO6	608	22	8992	3.36124	1	0.242799	0.19851
KEGG_PATHWAY	mmu04723:Retrograde endocannabinoid signaling	16	1.04031	0.0740553	GABRA2, GABRP, GRIA2, GABRA1, GABRB1, GABRA4, PRKCA, ADCY2, CACNA1C, ADCY8, GABRG3, GNG11, ADCY5, GNG4, GNG7, KCNJ3	608	148	8992	1.59886	1	0.308458	0.252192
KEGG_PATHWAY	mmu04625:C-type lectin receptor signaling pathway	13	0.845254	0.0743514	STAT1, NFATC2, NFATC1, CALML3, CALML4, LSP1, RELB, NFATC4, NFKBIA, PPP3CA, PPP3CC, MRAS, IL17D	608	112	8992	1.71664	1	0.308458	0.252192
KEGG_PATHWAY	mmu04933:AGE-RAGE signaling pathway in diabetic complications	12	0.780234	0.0776798	COL1A1, EGR1, TGFB2, COL3A1, COL1A2, TGFB3, STAT1, MMP2, NFATC1, PRKCA, AGTR1A, TGFBR2	608	101	8992	1.75717	1	0.317969	0.259968
KEGG_PATHWAY	mmu04912:GnRH signaling pathway	11	0.715215	0.0808678	EGR1, MMP14, MMP2, CALML3, PRKCA, ADCY2, CACNA1C, CALML4, ADCY8, EGFR, ADCY5	608	90	8992	1.8076	1	0.326663	0.267076

## Sheet: groupE12 5vsgroupE11 5_deg_down
Category	Term	Count	%	PValue	Genes	List Total	Pop Hits	Pop Total	Fold Enrichment	Bonferroni	Benjamini	FDR
KEGG_PATHWAY	mmu04060:Cytokine-cytokine receptor interaction	7	4.69799	0.0118503	IL18RAP, MPL, CSF2RB, CXCL13, BMPR1B, GDF6, ACVR2B	60	292	8992	3.59269	0.815994	1	1
KEGG_PATHWAY	mmu04020:Calcium signaling pathway	6	4.02685	0.0201916	RET, FGF17, FGF8, P2RX3, CHRNA7, VEGFD	60	240	8992	3.74667	0.944787	1	1
KEGG_PATHWAY	mmu05200:Pathways in cancer	9	6.04027	0.0245427	RET, FGF17, FGF8, FZD4, ZBTB16, PMAIP1, RARB, CSF2RB, VEGFD	60	543	8992	2.48398	0.970652	1	1
KEGG_PATHWAY	mmu04974:Protein digestion and absorption	4	2.68456	0.033713	CPA2, COL13A1, COL24A1, COL22A1	60	108	8992	5.55062	0.992325	1	1
KEGG_PATHWAY	mmu04550:Signaling pathways regulating pluripotency of stem cells	4	2.68456	0.0639144	FZD4, BMPR1B, DUSP9, ACVR2B	60	140	8992	4.2819	0.999916	1	1
KEGG_PATHWAY	mmu05226:Gastric cancer	4	2.68456	0.0752517	FGF17, FGF8, FZD4, RARB	60	150	8992	3.99644	0.999985	1	1
KEGG_PATHWAY	mmu04940:Type I diabetes mellitus	3	2.01342	0.0769797	H2-Q6, H2-Q7, GAD2	60	70	8992	6.42286	0.999989	1	1
KEGG_PATHWAY	mmu04390:Hippo signaling pathway	4	2.68456	0.0836852	CRB2, FZD4, BMPR1B, GDF6	60	157	8992	3.81826	0.999996	1	1

## Sheet: groupE12 5vsgroupE11 5_deg_up
Category	Term	Count	%	PValue	Genes	List Total	Pop Hits	Pop Total	Fold Enrichment	Bonferroni	Benjamini	FDR
KEGG_PATHWAY	mmu04974:Protein digestion and absorption	18	2.80811	8.46832e-09	CPA3, COL16A1, COL14A1, ELN, KCNJ13, COL11A2, COL12A1, SLC1A1, ATP1A2, COL1A1, SLC7A8, COL6A2, COL5A2, COL6A1, COL8A2, COL8A1, COL9A3, COL9A2	257	108	8992	5.83139	2.37959e-06	2.3796e-06	2.11708e-06
KEGG_PATHWAY	mmu05200:Pathways in cancer	39	6.08424	1.93393e-07	PTGER4, CEBPA, CDKN1A, LAMC3, PTGER2, LAMA3, PTGER3, CAMK2A, GSTT1, ADCY2, CALML4, ADCY8, ADCY5, SHH, FGF7, GNG4, HEY2, FGF20, CTNNA2, WNT10B, JAG1, GSTM1, LAMB3, GADD45B, WNT3A, PTCH2, FZD9, WNT7A, FOS, WNT9A, WNT16, MMP9, AGTR1A, BMP2, GSTA3, TRAF5, FGF18, FAS, FGFR3	257	543	8992	2.51297	5.43418e-05	2.71717e-05	2.41741e-05
KEGG_PATHWAY	mmu04080:Neuroactive ligand-receptor interaction	29	4.52418	4.63029e-06	PTGER4, PTGFR, GABRB1, CALCA, OXTR, CHRM1, THRA, NPY4R, PTGER2, PTGER3, GRIK3, GRIK1, ADRB1, NTS, ADRA1B, RXFP1, RXFP3, APELA, NPY, PENK, TAC1, GABRA4, AVPR1A, AGTR1A, ADRA2A, P2RX7, SST, F2RL1, AGTR2	257	386	8992	2.62866	0.00130027	0.000433704	0.000385858
KEGG_PATHWAY	mmu04512:ECM-receptor interaction	13	2.02808	6.58123e-06	LAMB3, LAMC3, LAMA3, TNC, THBS2, COL1A1, RELN, COL6A2, COL6A1, CHAD, COL9A3, COL9A2, CD44	257	88	8992	5.16873	0.00184762	0.000462332	0.000411327
KEGG_PATHWAY	mmu05217:Basal cell carcinoma	11	1.71607	9.92736e-06	WNT10B, SHH, BMP2, CDKN1A, GADD45B, WNT3A, PTCH2, FZD9, WNT7A, WNT9A, WNT16	257	63	8992	6.10907	0.00278572	0.000557918	0.000496368
KEGG_PATHWAY	mmu04024:cAMP signaling pathway	20	3.12012	1.56109e-05	RYR2, OXTR, CHRM1, PTGER2, CAMK2A, PTGER3, ADRB1, ATP1A2, ADCY2, FOS, CALML4, ADCY8, ADCY5, SST, NPY, CREB3L1, PPP1R1B, FXYD1, MYL9, CFTR	257	220	8992	3.18076	0.00437708	0.000632457	0.000562685
KEGG_PATHWAY	mmu04020:Calcium signaling pathway	21	3.27613	1.57552e-05	NTRK2, PTGFR, RYR2, OXTR, CHRM1, PDE1A, CAMK2A, PTGER3, ADRB1, ADCY2, CALML4, AVPR1A, NGF, ADCY8, ADRA1B, AGTR1A, P2RX7, FGF7, FGF18, FGF20, FGFR3	257	240	8992	3.06148	0.00441745	0.000632457	0.000562685
KEGG_PATHWAY	mmu04916:Melanogenesis	13	2.02808	2.48639e-05	WNT10B, WNT3A, CAMK2A, FZD9, WNT7A, ADCY2, CALML4, WNT9A, WNT16, ADCY8, ADCY5, DCT, CREB3L1	257	100	8992	4.54848	0.00696249	0.000830815	0.000739159
KEGG_PATHWAY	mmu04261:Adrenergic signaling in cardiomyocytes	16	2.4961	2.66097e-05	RYR2, TPM2, CAMK2A, TPM1, CACNA2D3, CACNA2D2, ADRB1, ATP1A2, ADCY2, CALML4, ADCY8, ADRA1B, AGTR1A, ADCY5, CREB3L1, AGTR2	257	152	8992	3.68298	0.00744955	0.000830815	0.000739159
KEGG_PATHWAY	mmu05165:Human papillomavirus infection	26	4.05616	3.53192e-05	PTGER4, H2-T23, CDKN1A, LAMC3, LAMA3, TNC, THBS2, RELN, CREB3L1, CHAD, HEY2, WNT10B, JAG1, LAMB3, WNT3A, FZD9, WNT7A, WNT9A, WNT16, COL1A1, COL6A2, COL6A1, FAS, COL9A3, COL9A2, ATP6V1B1	257	362	8992	2.51297	0.00987578	0.000992469	0.00088298
KEGG_PATHWAY	mmu05205:Proteoglycans in cancer	17	2.65211	0.000242133	WNT10B, CDKN1A, WNT3A, CAV1, CAMK2A, TWIST2, FZD9, WNT7A, WNT9A, WNT16, MMP9, DCN, COL1A1, SHH, FAS, FLNC, CD44	257	205	8992	2.90147	0.0657839	0.00618539	0.00550301
KEGG_PATHWAY	mmu05224:Breast cancer	14	2.18409	0.000277834	WNT10B, CDKN1A, JAG1, GADD45B, WNT3A, FZD9, WNT7A, FOS, WNT9A, WNT16, FGF7, HEY2, FGF18, FGF20	257	147	8992	3.33222	0.0751116	0.00650595	0.00578821
KEGG_PATHWAY	mmu04921:Oxytocin signaling pathway	14	2.18409	0.000410681	RYR2, MEF2C, OXTR, CDKN1A, CAMK2A, CACNA2D3, NFATC2, CACNA2D2, ADCY2, FOS, CALML4, ADCY8, ADCY5, MYL9	257	153	8992	3.20155	0.109013	0.00887704	0.00789772
KEGG_PATHWAY	mmu04151:PI3K-Akt signaling pathway	23	3.58814	0.000569424	NTRK2, NGFR, CDKN1A, CHRM1, LAMB3, LAMC3, LAMA3, TNC, NGF, THBS2, COL1A1, FGF7, RELN, GNG4, COL6A2, CREB3L1, COL6A1, CHAD, FGF18, FGF20, COL9A3, COL9A2, FGFR3	257	359	8992	2.24159	0.147902	0.0114292	0.0101683
KEGG_PATHWAY	mmu04934:Cushing syndrome	14	2.18409	0.000709116	WNT10B, CDKN1A, CDKN2C, WNT3A, CAMK2A, FZD9, WNT7A, ADCY2, WNT9A, WNT16, ADCY8, AGTR1A, ADCY5, CREB3L1	257	162	8992	3.02368	0.180722	0.0132841	0.0118186
KEGG_PATHWAY	mmu04923:Regulation of lipolysis in adipocytes	8	1.24805	0.00098371	NPY, PTGER3, PRKG2, ADRB1, ADCY2, ADCY8, MGLL, ADCY5	257	56	8992	4.99833	0.241611	0.0172764	0.0153705
KEGG_PATHWAY	mmu05226:Gastric cancer	13	2.02808	0.00116062	WNT10B, CDKN1A, GADD45B, WNT3A, FZD9, WNT7A, WNT9A, WNT16, FGF7, SHH, FGF18, FGF20, CTNNA2	257	150	8992	3.03232	0.278428	0.0184131	0.0163818
KEGG_PATHWAY	mmu04971:Gastric acid secretion	9	1.40406	0.00125511	SST, CAMK2A, SLC26A7, ATP1A2, ADCY2, CALML4, ADCY8, CFTR, ADCY5	257	75	8992	4.1986	0.297358	0.0184131	0.0163818
KEGG_PATHWAY	mmu04022:cGMP-PKG signaling pathway	14	2.18409	0.00130435	MEF2C, NFATC2, ADRB1, ATP1A2, ADCY2, CALML4, ADCY8, ADRA1B, AGTR1A, ADRA2A, ADCY5, CREB3L1, PRKG2, MYL9	257	173	8992	2.83143	0.307026	0.0184131	0.0163818
KEGG_PATHWAY	mmu04924:Renin secretion	9	1.40406	0.00136896	PTGER4, PTGER2, PDE1A, PRKG2, ADRB1, CALML4, AGTR1A, AQP1, ADCY5	257	76	8992	4.14335	0.31951	0.0184131	0.0163818
KEGG_PATHWAY	mmu05414:Dilated cardiomyopathy	10	1.56006	0.00137607	RYR2, TPM2, TPM1, LMNA, CACNA2D3, CACNA2D2, ADRB1, ADCY2, ADCY8, ADCY5	257	94	8992	3.72216	0.320869	0.0184131	0.0163818
KEGG_PATHWAY	mmu04510:Focal adhesion	15	2.34009	0.00178043	LAMB3, LAMC3, CAV1, LAMA3, TNC, THBS2, COL1A1, RELN, COL6A2, COL6A1, CHAD, COL9A3, COL9A2, FLNC, MYL9	257	201	8992	2.61107	0.393922	0.0227409	0.0202321
KEGG_PATHWAY	mmu05207:Chemical carcinogenesis - receptor activation	16	2.4961	0.0019086	JAG1, GSTM1, ADRB1, GSTT1, ADCY2, FOS, KLF4, ADCY8, ADCY5, FGF7, BCL6, GSTA3, CREB3L1, FGF18, FGF20, CYP1B1	257	225	8992	2.48806	0.4154	0.0233181	0.0207456
KEGG_PATHWAY	mmu04750:Inflammatory mediator regulation of TRP channels	11	1.71607	0.00330464	PTGER4, TRPV4, PTGER2, CAMK2A, F2RL1, ADCY2, CALML4, NGF, ADCY8, ASIC3, ADCY5	257	127	8992	3.03049	0.605502	0.0386918	0.0344233
KEGG_PATHWAY	mmu04926:Relaxin signaling pathway	11	1.71607	0.00369862	ACTA2, COL1A1, GNG4, CREB3L1, ADCY2, FOS, ADCY8, MMP9, RXFP1, ADCY5, RXFP3	257	129	8992	2.9835	0.646983	0.0415725	0.0369862
KEGG_PATHWAY	mmu05202:Transcriptional misregulation in cancer	15	2.34009	0.00477716	NGFR, CEBPA, CEBPB, MEF2C, CDKN1A, CDKN2C, GADD45B, TMPRSS2, WNT16, MMP9, NR4A3, MAF, BCL6, TLX1, ERG	257	224	8992	2.34297	0.739616	0.0504527	0.0448867
KEGG_PATHWAY	mmu04915:Estrogen signaling pathway	11	1.71607	0.00484777	KRT17, KRT15, CREB3L1, KRT14, ADCY2, CALML4, FOS, ADCY8, MMP9, ADCY5, HSPA1A	257	134	8992	2.87218	0.744756	0.0504527	0.0448867
KEGG_PATHWAY	mmu04371:Apelin signaling pathway	11	1.71607	0.00566148	ACTA2, RYR2, MEF2C, APELA, JAG1, GNG4, ADCY2, CALML4, ADCY8, AGTR1A, ADCY5	257	137	8992	2.80928	0.797172	0.056817	0.0505489
KEGG_PATHWAY	mmu04713:Circadian entrainment	9	1.40406	0.00669445	RYR2, GNG4, CAMK2A, PRKG2, ADCY2, CALML4, FOS, ADCY8, ADCY5	257	98	8992	3.21321	0.848545	0.0648669	0.0577108
KEGG_PATHWAY	mmu04970:Salivary secretion	8	1.24805	0.0104436	PRKG2, ADRB1, ATP1A2, ADCY2, CALML4, ADCY8, ADRA1B, ADCY5	257	85	8992	3.29302	0.947665	0.0978217	0.08703
KEGG_PATHWAY	mmu04928:Parathyroid hormone synthesis, secretion and action	9	1.40406	0.0117622	MEF2C, CDKN1A, MAFB, CREB3L1, ADCY2, FOS, ADCY8, PTHLH, ADCY5	257	108	8992	2.91569	0.96402	0.106619	0.0948567
KEGG_PATHWAY	mmu04724:Glutamatergic synapse	9	1.40406	0.0151587	GNG4, SLC1A1, GRIK3, SLC1A2, GRIK1, ADCY2, ADCY8, ADCY5, SHANK1	257	113	8992	2.78668	0.986325	0.130803	0.116373
KEGG_PATHWAY	mmu00982:Drug metabolism - cytochrome P450	7	1.09204	0.0153612	GSTM1, GSTA3, AOX2, AOX3, FMO1, GSTT1, ADH7	257	71	8992	3.44955	0.987093	0.130803	0.116373
KEGG_PATHWAY	mmu04657:IL-17 signaling pathway	8	1.24805	0.016573	CEBPB, TRAF5, FOS, IL17D, MMP9, S100A9, CXCL5, S100A8	257	93	8992	3.00975	0.990869	0.133057	0.118379
KEGG_PATHWAY	mmu01522:Endocrine resistance	8	1.24805	0.016573	CDKN1A, JAG1, CDKN2C, ADCY2, FOS, ADCY8, MMP9, ADCY5	257	93	8992	3.00975	0.990869	0.133057	0.118379
KEGG_PATHWAY	mmu00980:Metabolism of xenobiotics by cytochrome P450	7	1.09204	0.0174259	CBR2, GSTM1, GSTA3, CYP1B1, GSTT1, ADH7, CBR3	257	73	8992	3.35505	0.992844	0.136019	0.121013
KEGG_PATHWAY	mmu04010:MAPK signaling pathway	16	2.4961	0.0208267	NTRK2, NGFR, MEF2C, GADD45B, CACNA2D3, CACNA2D2, FOS, NGF, FGF7, DUSP10, FGF18, FGF20, FAS, FLNC, FGFR3, HSPA1A	257	294	8992	1.90413	0.997299	0.158171	0.140721
KEGG_PATHWAY	mmu04270:Vascular smooth muscle contraction	10	1.56006	0.0216839	ACTA2, CALCA, ADCY2, CALML4, AVPR1A, ADCY8, ADRA1B, MYL9, AGTR1A, ADCY5	257	144	8992	2.42974	0.997888	0.160347	0.142657
KEGG_PATHWAY	mmu04925:Aldosterone synthesis and secretion	8	1.24805	0.0261069	CREB3L1, CAMK2A, ATP1A2, ADCY2, CALML4, ADCY8, AGTR1A, ADCY5	257	102	8992	2.74418	0.999409	0.184026	0.163725
KEGG_PATHWAY	mmu00350:Tyrosine metabolism	5	0.780031	0.0262795	GOT1L1, DCT, AOX2, AOX3, ADH7	257	40	8992	4.37354	0.999438	0.184026	0.163725
KEGG_PATHWAY	mmu05225:Hepatocellular carcinoma	11	1.71607	0.0268508	WNT10B, CDKN1A, GSTM1, GADD45B, WNT3A, GSTA3, FZD9, WNT7A, GSTT1, WNT9A, WNT16	257	174	8992	2.21191	0.999523	0.184026	0.163725
KEGG_PATHWAY	mmu00534:Glycosaminoglycan biosynthesis - heparan sulfate / heparin	4	0.624025	0.029687	EXTL1, NDST3, HS3ST5, HS3ST1	257	24	8992	5.83139	0.99979	0.19862	0.176708
KEGG_PATHWAY	mmu05163:Human cytomegalovirus infection	14	2.18409	0.0312233	PTGER4, H2-T23, CDKN1A, PTGER2, PTGER3, NFATC2, ADCY2, CALML4, ADCY8, ADCY5, GNG4, CREB3L1, TRAF5, FAS	257	256	8992	1.91342	0.999865	0.204041	0.181531
KEGG_PATHWAY	mmu04390:Hippo signaling pathway	10	1.56006	0.0352298	WNT10B, BMP2, WNT3A, FZD9, TRP73, WNT7A, CTNNA2, WNT9A, WNT16, BMP6	257	157	8992	2.22856	0.999958	0.22223	0.197714
KEGG_PATHWAY	mmu04911:Insulin secretion	7	1.09204	0.0355885	RYR2, CREB3L1, CAMK2A, ATP1A2, ADCY2, ADCY8, ADCY5	257	86	8992	2.84789	0.999962	0.22223	0.197714
KEGG_PATHWAY	mmu04725:Cholinergic synapse	8	1.24805	0.0404695	CHRM1, GNG4, CREB3L1, CAMK2A, ADCY2, FOS, ADCY8, ADCY5	257	112	8992	2.49917	0.999991	0.246958	0.219713
KEGG_PATHWAY	mmu04668:TNF signaling pathway	8	1.24805	0.0421409	CEBPB, JAG1, CREB3L1, TRAF5, FAS, FOS, MMP9, CXCL5	257	113	8992	2.47705	0.999994	0.246958	0.219713
KEGG_PATHWAY	mmu04015:Rap1 signaling pathway	12	1.87207	0.042185	APBB1IP, NGFR, FGF7, FGF18, FGF20, ADCY2, CALML4, NGF, ADCY8, FGFR3, RAP1GAP, ADCY5	257	214	8992	1.96196	0.999995	0.246958	0.219713
KEGG_PATHWAY	mmu05032:Morphine addiction	7	1.09204	0.044957	GABRB1, GNG4, GABRA4, PDE1A, ADCY2, ADCY8, ADCY5	257	91	8992	2.69141	0.999998	0.25554	0.227348
KEGG_PATHWAY	mmu05031:Amphetamine addiction	6	0.936037	0.0462744	CREB3L1, CAMK2A, PPP1R1B, CALML4, FOS, ADCY5	257	69	8992	3.04246	0.999998	0.25554	0.227348
KEGG_PATHWAY	mmu04550:Signaling pathways regulating pluripotency of stem cells	9	1.40406	0.0463791	WNT10B, WNT3A, HOXD1, FZD9, WNT7A, WNT9A, WNT16, KLF4, FGFR3	257	140	8992	2.24925	0.999998	0.25554	0.227348
KEGG_PATHWAY	mmu04350:TGF-beta signaling pathway	7	1.09204	0.0534645	GREM2, BMP2, FST, NOG, FMOD, BMP6, DCN	257	95	8992	2.57809	1	0.288914	0.257041
KEGG_PATHWAY	mmu04310:Wnt signaling pathway	10	1.56006	0.0553508	WNT10B, WNT3A, CAMK2A, FZD9, NFATC2, WNT7A, RSPO3, WNT9A, LGR6, WNT16	257	171	8992	2.0461	1	0.293464	0.261089
KEGG_PATHWAY	mmu04918:Thyroid hormone synthesis	6	0.936037	0.0592907	TTR, CREB3L1, ATP1A2, ADCY2, ADCY8, ADCY5	257	74	8992	2.83689	1	0.308531	0.274494
KEGG_PATHWAY	mmu05418:Fluid shear stress and atherosclerosis	9	1.40406	0.0605168	MEF2C, GSTM1, GSTA3, TRPV4, CAV1, GSTT1, CALML4, FOS, MMP9	257	148	8992	2.12767	1	0.309186	0.275077
KEGG_PATHWAY	mmu04360:Axon guidance	10	1.56006	0.0735647	ROBO2, SEMA6B, EPHA5, SHH, ABLIM3, CAMK2A, NFATC2, SEMA4F, UNC5D, MYL9	257	181	8992	1.93306	1	0.369137	0.328414
KEGG_PATHWAY	mmu04614:Renin-angiotensin system	4	0.624025	0.0873133	CPA3, ENPEP, AGTR2, AGTR1A	257	37	8992	3.78252	1	0.430439	0.382953
KEGG_PATHWAY	mmu05143:African trypanosomiasis	4	0.624025	0.0986231	IL18, FAS, F2RL1, HBB-BS	257	39	8992	3.58855	1	0.477812	0.425099
